# Supplementary material for: A nanocompartment system contributes to defense against oxidative stress in Mycobacterium tuberculosis
Source: eLife journal article supplement (doi:10.7554/elife.74358), 2021-11-09
Supplement: supp [file elife_poa_e74358_Supplementary_file_1.xlsx]

## Sheet: key
N	Number of TA sites in the gene
TAs Hit	Number of TA sites in the gene with a transposon insertion
Sum Rd 1	Sum of the read counts in control
Sum Rd 2	Sum of the read counts in experimental condition
Delta Rd	Difference in sum the of read counts between experimental condition and control
log2 FC	Log2 fold-change of experiment condition over control
p-value	P-value calculated by the permutation test
p-adj	Adjusted p-value controlling for the FDR (Benjamini-Hochberg)

## Sheet: TnSeq H2O2 low pH
Gene	Name	Description	N	TAs Hit	Sum Rd 1	Sum Rd 2	Delta Rd	log2 FC	p-value	p-adj	included in Fig 3A
Rv0174	-	MCE-family protein Mce1F	31	26	70944.3	29141.4	-41802.8	-1.28	0	0
Rv1328	-	glycogen phosphorylase GlgP	45	41	9234.2	3546.6	-5687.7	-1.38	0	0
Rv1640c	-	lysyl-tRNA synthetase 2 LysX	65	54	216251	25741.7	-190509	-3.07	0	0
Rv1908c	-	catalase-peroxidase-peroxynitritase T KatG	39	28	1786.1	14.4	-1771.7	-6.95	0	0	*
Rv2222c	-	glutamine synthetase GlnA2	20	18	6681.1	879.7	-5801.4	-2.93	0	0
Rv2583c	-	GTP pyrophosphokinase RelA	36	22	16511.6	2170	-14341.7	-2.93	0	0
Rv2967c	-	pyruvate carboxylase Pca	63	45	14201	4060.6	-10140.4	-1.81	0	0
Rv3158	-	NADH dehydrogenase subunit N NuoN	32	28	38361.8	76370.7	38008.9	0.99	0	0
Rv3540c	-	lipid-transfer protein or keto acyl-CoA thiolase Ltp2	21	14	4988.2	601.7	-4386.6	-3.05	0	0
Rv3543c	-	acyl-CoA dehydrogenase FadE29	19	14	4650.1	372.3	-4277.8	-3.64	0	0
Rv0169	-	MCE-family protein Mce1A	39	35	97254	43429.8	-53824.2	-1.16	0.0001	0.0237
Rv0172	-	MCE-family protein Mce1D	33	28	63252	27598.8	-35653.1	-1.2	0.0001	0.0237
Rv0758	-	OmpR family two-component system sensor histidine kinase	18	12	143.9	6.4	-137.5	-4.48	0.0001	0.0237
Rv1086	-	short-chain Z-isoprenyl diphosphate synthase	15	11	6493.5	1598.2	-4895.3	-2.02	0.0001	0.0237
Rv1823	-	hypothetical protein	16	13	12603.6	879.1	-11724.5	-3.84	0.0001	0.0237
Rv3542c	-	hypothetical protein	10	9	11361	1127.7	-10233.3	-3.33	0.0001	0.0237
Rv3544c	-	acyl-CoA dehydrogenase FadE28	20	19	17294	5232.1	-12061.9	-1.72	0.0001	0.0237
Rv0012	-	membrane protein	16	13	16629	2486.9	-14142.1	-2.74	0.0002	0.0448
Rv0147	-	aldehyde dehydrogenase (NAD+)	26	24	121450	59254.4	-62195.7	-1.04	0.0003	0.0605
Rv2241	-	pyruvate dehydrogenase E1 component AceE	58	46	7275.2	3002.6	-4272.6	-1.28	0.0003	0.0605
Rv0176	-	MCE-associated membrane protein	15	14	35993.9	14686.8	-21307.1	-1.29	0.0004	0.0702
Rv3152	-	NADH dehydrogenase subunit H NuoH	27	24	17065	40813.7	23748.7	1.26	0.0004	0.0702
Rv3689	-	transmembrane protein	33	26	31202.9	59373.4	28170.6	0.93	0.0004	0.0702
Rv3151	-	NADH dehydrogenase subunit G NuoG	30	20	10577.2	22892.4	12315.2	1.11	0.0005	0.0807
Rv3455c	-	tRNA pseudouridine synthase A TruA	11	8	51.4	0	-51.4	-4.1	0.0005	0.0807
Rv1213	-	glucose-1-phosphate adenylyltransferase GlgC	31	28	37154.9	75309.8	38154.8	1.02	0.0008	0.1242
Rv0168	-	ABC transporter permease YrbE1B	14	14	34733.9	16422.9	-18311	-1.08	0.0009	0.1345
Rv2383c	-	phenyloxazoline synthase MbtB	50	31	71.6	287.8	216.2	2.01	0.0012	0.173
Rv0041	-	leucyl-tRNA synthetase LeuS	72	17	18.8	3.9	-14.9	-2.26	0.0013	0.1809
Rv0173	-	MCE-family lipoprotein LprK	16	14	46383	22170.5	-24212.5	-1.06	0.0014	0.1883
Rv1957	-	hypothetical protein	13	11	6112.6	1141.8	-4970.8	-2.42	0.0017	0.2213
Rv0554	-	peroxidase BpoC	14	12	97.9	290.4	192.5	1.57	0.0018	0.227	*
Rv0348	-	transcriptional regulator	18	10	100.8	984.1	883.3	3.29	0.002	0.2446
Rv1461	-	Fe-S cluster assembly protein SufB	59	6	8.9	0	-8.9	-1.58	0.0022	0.2537
Rv2937	-	doxorubicin resistance ABC transporter permease DrrB	23	18	15385.9	36622.8	21236.9	1.25	0.0022	0.2537
Rv0798c	-	antigen Cfp29	10	6	10654	1268	-9386	-3.07	0.0024	0.2595
Rv3245c	-	two-component system sensor histidine kinase MtrB	20	7	8	0	-8	-1.41	0.0025	0.2595
Rv0170	-	MCE-family protein Mce1B	18	15	45052.2	20263.2	-24789	-1.15	0.0026	0.2595
Rv0465c	-	transcriptional regulator	27	26	10882.7	4071.5	-6811.2	-1.42	0.0026	0.2595
Rv3194c	-	PDZ domain-containing protease	16	14	9410	19712.5	10302.5	1.07	0.0026	0.2595
Rv0178	-	MCE-associated membrane protein	11	9	28642.1	10702.2	-17939.8	-1.42	0.0027	0.2595
Rv0747	-	PE-PGRS family protein PE_PGRS10	17	15	14803.3	5048.6	-9754.7	-1.55	0.0027	0.2595
Rv2614c	-	threonyl-tRNA synthetase ThrS	28	14	15.9	3.9	-12	-2.01	0.003	0.2752
Rv3670	-	epoxide hydrolase EphE	15	9	84.3	1.6	-82.8	-5.74	0.003	0.2752
Rv1479	-	transcriptional regulator MoxR1	14	6	9	0	-9	-1.58	0.0032	0.287
Rv1058	-	fatty-acid-CoA ligase FadD14	29	23	42014.1	17986.5	-24027.6	-1.22	0.0033	0.2883
Rv2936	-	doxorubicin resistance ATP-binding protein DrrA	19	19	27490.2	63945.4	36455.2	1.22	0.0034	0.2883
Rv0157	-	NAD(P) transhydrogenase subunit beta PntB	14	13	3243.9	1059.6	-2184.3	-1.61	0.0035	0.2883
Rv3113	-	phosphatase	9	5	2203.9	5761.5	3557.7	1.39	0.0035	0.2883
Rv0541c	-	integral membrane protein	18	11	2508.9	130.4	-2378.5	-4.27	0.0037	0.2987
Rv1623c	-	integral membrane cytochrome D ubiquinol oxidase CydA	22	11	4067.7	519	-3548.7	-2.97	0.0038	0.3007
Rv2404c	-	GTP-binding protein LepA	30	26	19870.1	9627.2	-10242.9	-1.05	0.0041	0.3182
Rv3311	-	hypothetical protein	16	15	21994.6	7290.4	-14704.2	-1.59	0.0043	0.3274
Rv3136A	-	hypothetical protein	12	11	11395.3	3823.8	-7571.6	-1.58	0.0046	0.3438
Rv0708	-	50S ribosomal protein L16 RplP	10	4	8	0	-8	-1.42	0.0047	0.3449
Rv0472c	-	transcriptional regulator TetR-family	10	8	13487.7	4015.7	-9472	-1.75	0.0048	0.3459
Rv3002c	-	acetolactate synthase small subunit IlvN	4	4	19.8	163.6	143.7	3.04	0.0058	0.4104
Rv1825	-	hypothetical protein	11	10	11849.8	3748.9	-8101	-1.66	0.0059	0.4104
Rv1611	-	indole-3-glycerol phosphate synthase TrpC	12	5	16.1	0	-16.1	-2.42	0.006	0.4104
Rv3825c	-	polyketide synthase Pks2	121	105	107496	75538.6	-31957.9	-0.51	0.0063	0.4238
Rv0497	-	transmembrane protein	15	13	4819.7	13541.8	8722.1	1.49	0.0067	0.4361
Rv2083	-	hypothetical protein	6	5	8767.7	4049.8	-4717.9	-1.11	0.0067	0.4361
Rv2448c	-	valyl-tRNA synthase ValS	28	10	13	2.8	-10.3	-2.24	0.0069	0.4387
Rv0092	-	cation transporter P-type ATPase CtpA	30	24	14536.4	6169	-8367.3	-1.24	0.007	0.4387
Rv3326	-	transposase	20	7	11.1	53.2	42.1	2.26	0.0072	0.4387
Rv0827c	-	ArsR family transcriptional regulator KmtR	7	6	907.6	2585.9	1678.3	1.51	0.0074	0.4387
Rv1538c	-	L-asparaginase AnsA	14	13	11030.1	5042.9	-5987.1	-1.13	0.0074	0.4387
Rv3842c	-	glycerophosphoryl diester phosphodiesterase GlpQ1	11	10	151920	65783.6	-86136.6	-1.21	0.0074	0.4387
Rv3156	-	NADH dehydrogenase subunit L NuoL	35	27	19639.5	39211.4	19571.9	1	0.0075	0.4387
Rv3153	-	NADH dehydrogenase subunit I NuoI	23	18	24569.5	46232.2	21662.6	0.91	0.0079	0.4555
Rv2553c	-	membrane protein	18	10	3.9	78.5	74.5	4.32	0.0087	0.4946
Rv2822c	-	CRISPR type III-a/mtube-associated protein csm2	13	9	3180.1	7075.1	3895	1.15	0.009	0.4976
Rv3220c	-	two-component system sensor histidine kinase	22	18	220.1	1262.7	1042.7	2.52	0.009	0.4976
Rv1133c	-	5-methyltetrahydropteroyltriglutamate- homocysteine methyltransferase MetE	35	11	11.9	2.9	-9	-2.04	0.0092	0.5018
Rv0171	-	MCE-family protein Mce1C	25	24	58358.1	31799.4	-26558.7	-0.88	0.0095	0.5057
Rv2384	-	salicyl-AMP ligase MbtA	21	13	25.7	144.2	118.5	2.49	0.0096	0.5057
Rv3149	-	NADH dehydrogenase subunit E NuoE	9	7	7746.9	19341.3	11594.3	1.32	0.0098	0.5057
Rv0655	-	ribonucleotide-transport ABC transporter ATP-binding protein Mkl	15	12	20321.7	9284.6	-11037	-1.13	0.0099	0.5057
Rv0986	-	adhesion component transport ABC transporter ATP-binding protein	25	13	2531.7	5694.7	3163	1.17	0.0099	0.5057
Rv3754	-	prephenate dehydrogenase TyrA	14	6	4616.1	1175.4	-3440.6	-1.97	0.0101	0.5057
Rv1248c	-	2-oxoglutarate decarboxylase	46	13	13	3.7	-9.3	-1.82	0.0102	0.5057
Rv1964	-	ABC transporter permease YrbE3A	6	5	10504	17523.8	7019.8	0.74	0.0103	0.5057
Rv3824c	-	acyltransferase PapA1	46	32	42033.5	19371.4	-22662.1	-1.12	0.0104	0.5057
Rv0955	-	integral membrane protein	19	16	3958.1	993.2	-2964.9	-1.99	0.011	0.5285
Rv0635	-	(3R)-hydroxyacyl-ACP dehydratase subunit HadA	14	5	6	0	-6	-1	0.0112	0.5318
Rv3397c	-	phytoene synthase PhyA	18	16	13077.5	6655.6	-6421.9	-0.97	0.0126	0.5892
Rv1280c	-	periplasmic oligopeptide-binding lipoprotein OppA	26	23	28721.5	16894.1	-11827.4	-0.77	0.0127	0.5892
Rv3061c	-	acyl-CoA dehydrogenase FadE22	24	20	12890	23789.8	10899.8	0.88	0.0132	0.6031
Rv0524	-	glutamate-1-semialdehyde 2,1-aminomutase HemL	21	8	10.8	2.4	-8.5	-2.2	0.0133	0.6031
Rv2207	-	nicotinate-nucleotide-dimethylbenzimidazol phosphoribosyltransferase CobT	8	6	2189.5	485.3	-1704.2	-2.17	0.0141	0.6323
Rv0529	-	cytochrome C-type biogenesis protein CcsA	18	5	7	0	-7	-1.22	0.0143	0.6342
Rv1565c	-	hypothetical protein	46	39	3662.7	6737.1	3074.4	0.88	0.0145	0.6361
Rv2401	-	hypothetical protein	4	3	135.2	548.3	413.1	2.02	0.0147	0.6373
Rv1824	-	hypothetical protein	5	5	5991	125.9	-5865.1	-5.57	0.015	0.6373
Rv3852	-	histone-like protein Hns	4	4	8577.2	3663.3	-4913.9	-1.23	0.015	0.6373
Rv0061c	-	hypothetical protein	6	5	776.1	2288.4	1512.4	1.56	0.0152	0.639
Rv0950c	-	hypothetical protein	21	18	6564.1	13790.6	7226.5	1.07	0.0157	0.6466
Rv1202	-	succinyl-diaminopimelate desuccinylase DapE	17	5	11.9	0	-11.9	-1.99	0.0157	0.6466
Rv1017c	-	ribose-phosphate pyrophosphokinase PrsA	12	5	15.1	0	-15.1	-2.33	0.016	0.6523
Rv0073	-	glutamine-transport ABC transporter ATP-binding protein	15	15	13274.8	21925.8	8651.1	0.72	0.0171	0.6701
Rv1244	-	lipoprotein LpqZ	8	8	9762.7	17264	7501.3	0.82	0.0171	0.6701
Rv3147	-	NADH dehydrogenase subunit C NuoC	14	12	6375.6	12539.1	6163.4	0.98	0.0171	0.6701
Rv3154	-	NADH dehydrogenase subunit J NuoJ	10	9	6161.5	17998.8	11837.2	1.55	0.0172	0.6701
Rv2051c	-	polyprenol-monophosphomannose synthase Ppm1	33	19	5592.2	1529.9	-4062.3	-1.87	0.0173	0.6701
Rv2933	-	phenolpthiocerol synthesis type-I polyketide synthase PpsC	84	35	42.8	18.9	-23.9	-1.18	0.0175	0.6701
Rv0047c	-	hypothetical protein	7	5	29456.3	7452.3	-22003.9	-1.98	0.0176	0.6701
Rv2173	-	geranylgeranyl pyrophosphate synthetase IdsA2	19	15	11616.1	3037.6	-8578.5	-1.94	0.018	0.675
Rv1592c	-	triacylglycerol lipase	26	18	146.5	419.6	273.1	1.52	0.0181	0.675
Rv0563	-	protease transmembrane protein heat shock protein HtpX	11	8	142.6	886.4	743.8	2.64	0.0185	0.675
Rv1347c	-	lysine N-acetyltransferase MbtK	14	7	5	64.7	59.7	3.69	0.0185	0.675
Rv2198c	-	membrane protein MmpS3	15	5	5	0	-5	-0.74	0.0187	0.675
Rv3474	-	transposase	5	4	16.8	205.9	189	3.61	0.0188	0.675
Rv3041c	-	ABC transporter ATP-binding protein	9	8	4382.8	1415.4	-2967.4	-1.63	0.0189	0.675
Rv0581	-	antitoxin VapB26	4	4	4313.4	9680.6	5367.1	1.17	0.0191	0.6762
Rv1564c	-	maltooligosyltrehalose synthase TreX	49	37	48630.4	29517	-19113.4	-0.72	0.0193	0.6773
Rv1821	-	preprotein translocase ATPase subunit SecA2	39	33	23443.9	11502.5	-11941.4	-1.03	0.0204	0.708
Rv2115c	-	mycobacterial proteasome ATPase Mpa	28	9	9	1.2	-7.8	-2.93	0.0206	0.708
Rv3820c	-	acyltransferase PapA2	40	31	29863	18239.5	-11623.4	-0.71	0.0207	0.708
Rv1384	-	carbamoyl-phosphate synthase large chain CarB	46	16	15.9	5.3	-10.6	-1.59	0.0215	0.7265
Rv3193c	-	transmembrane protein	83	21	23.1	8.4	-14.7	-1.46	0.0216	0.7265
Rv2723	-	TerC family integral membrane protein	27	22	13346.4	20361.7	7015.3	0.61	0.022	0.7338
Rv0815c	-	thiosulfate sulfurtransferase CysA2	15	12	3883.3	6675.1	2791.7	0.78	0.0224	0.741
Rv0155	-	NAD(P) transhydrogenase subunit alpha PntAa	10	9	1686.5	219.6	-1466.9	-2.94	0.0226	0.7416
Rv1100	-	hypothetical protein	10	9	10977.2	5893.2	-5084	-0.9	0.0234	0.7527
Rv1353c	-	transcriptional regulator	13	10	3692.2	9482.9	5790.6	1.36	0.0234	0.7527
Rv0981	-	mycobacterial persistence regulator MRPA	11	10	10632.6	4774.1	-5858.5	-1.16	0.0235	0.7527
Rv2202c	-	adenosine kinase AdoK	19	6	22.8	1.3	-21.5	-4.12	0.0238	0.7564
Rv3371	-	diacylglycerol acyltransferase	20	13	10095.7	4501.2	-5594.4	-1.17	0.0246	0.7757
Rv1002c	-	protein O-mannosyltransferase	24	8	7.9	1.2	-6.7	-2.74	0.0251	0.7853
Rv2580c	-	histidyl-tRNA synthetase HisS	18	9	11	2.4	-8.7	-2.22	0.026	0.8072
Rv1071c	-	enoyl-CoA hydratase EchA9	12	12	7393.5	12851.4	5457.9	0.8	0.0275	0.8433
Rv0241c	-	3-hydroxyacyl-thioester dehydratase HtdX	16	14	1365.4	3151.6	1786.2	1.21	0.0279	0.8433
Rv3062	-	ATP-dependent DNA ligase LigB	19	16	24677.7	10744.5	-13933.2	-1.2	0.028	0.8433
Rv3150	-	NADH dehydrogenase subunit F NuoF	25	19	19225.1	29918.6	10693.5	0.64	0.028	0.8433
Rv3692	-	methanol dehydrogenase transcriptional regulator MoxR2	16	16	14947.6	27181.3	12233.7	0.86	0.0286	0.8479
Rv0504c	-	hypothetical protein	8	6	18.7	1.3	-17.4	-3.83	0.0288	0.8479
Rv0478	-	deoxyribose-phosphate aldolase DeoC	3	2	1834.4	3564.8	1730.3	0.96	0.029	0.8479
Rv2728c	-	alanine rich protein	11	10	10440.1	5543.5	-4896.7	-0.91	0.0291	0.8479
Rv3014c	-	DNA ligase LigA	13	6	9.1	1.3	-7.8	-2.79	0.0292	0.8479
Rv3781	-	O-antigen/lipopolysaccharide transport ABC transporter ATP-binding protein RfbE	14	3	0	5.3	5.3	0.81	0.0296	0.8517
Rv1420	-	excinuclease ABC UvrC	29	23	16512.8	7965.2	-8547.6	-1.05	0.0298	0.8517
Rv1566c	-	invasion-associated protein	10	10	3500.5	6738	3237.4	0.94	0.0303	0.8517
Rv0400c	-	acyl-CoA dehydrogenase FadE7	10	8	4928.4	1797.5	-3130.9	-1.46	0.0304	0.8517
Rv2703	-	RNA polymerase sigma factor SigA	21	3	6	0	-6	-0.99	0.0304	0.8517
Rv3663c	-	dipeptide-transport ABC transporter ATP-binding protein DppD	26	15	2372.8	4741.1	2368.3	1	0.0306	0.8517
Rv3273	-	transmembrane carbonic anhydrase	31	23	16271.3	25085.6	8814.3	0.62	0.0312	0.8594
Rv0803	-	phosphoribosylformylglycinamidine synthase II PurL	35	9	12.8	2.4	-10.4	-2.44	0.0313	0.8594
Rv1471	-	thioredoxin TrxB1	2	1	148	502.6	354.5	1.76	0.0321	0.8749
Rv2585c	-	peptide/nickel transporter substrate-binding protein	28	26	26571.5	42844.1	16272.5	0.69	0.0323	0.8749
Rv0946c	-	glucose-6-phosphate isomerase Pgi	19	10	13	3.8	-9.2	-1.77	0.0333	0.8869
Rv1755c	-	phospholipase C4 PlcD	19	5	446.2	1078.3	632.1	1.27	0.0333	0.8869
Rv3046c	-	hypothetical protein	2	1	1409.2	322.7	-1086.5	-2.13	0.0334	0.8869
Rv1794	-	hypothetical protein	22	7	2	10.5	8.5	2.4	0.0338	0.8911
Rv0363c	-	fructose-bisphosphate aldolase Fba	17	7	3	218.8	215.8	6.19	0.034	0.8911
Rv1682	-	DivIVA family protein	16	13	11685.8	5684	-6001.8	-1.04	0.0347	0.9035
Rv1795	-	ESX-5 secretion system protein EccD5	23	6	8	1.6	-6.4	-2.34	0.0359	0.9087
Rv1782	-	ESX-5 secretion system protein EccB5	20	4	16.9	1.3	-15.6	-3.69	0.0361	0.9087
Rv0951	-	succinyl-CoA synthetase beta chain SucC	16	4	5	0	-5	-0.73	0.0362	0.9087
Rv2185c	-	hypothetical protein	14	12	19282.1	11683	-7599.1	-0.72	0.0362	0.9087
Rv2581c	-	hydroxyacylglutathione hydrolase	7	4	114	9.5	-104.6	-3.59	0.0363	0.9087
Rv3137	-	histidinol-phosphatase	8	6	7	1.2	-5.8	-2.56	0.0363	0.9087
Rv0806c	-	UDP-glucose-4-epimerase CpsY	42	29	3926.4	1929.9	-1996.4	-1.02	0.0365	0.9087
Rv3138	-	pyruvate formate lyase activating protein PflA	21	21	21777	12084.8	-9692.2	-0.85	0.0367	0.9087
Rv3112	-	molybdenum cofactor biosynthesis protein D1 MoaD1	7	2	264.4	1078.9	814.6	2.03	0.0375	0.9198
Rv3421c	-	universal bacterial protein YeaZ	10	8	8179.4	3334.3	-4845.2	-1.29	0.0378	0.9198
Rv0753c	-	methylmalonate-semialdehyde dehydrogenase MmsA	18	17	14460.8	23402.5	8941.7	0.69	0.0382	0.9198
Rv2093c	-	sec-independent protein translocase transmembrane protein TatC	12	4	8	0	-8	-1.42	0.0382	0.9198
Rv2376c	-	antigen CFP2	2	2	1428.3	3389.8	1961.5	1.25	0.0384	0.9198
Rv3047c	-	hypothetical protein	5	4	4802.6	8654.6	3852	0.85	0.0386	0.9198
Rv0811c	-	folate-binding protein YgfZ	17	8	4	47.6	43.6	3.56	0.0389	0.9198
Rv2190c	-	hypothetical protein	19	16	22396.6	40171.3	17774.7	0.84	0.0392	0.9198
Rv2347c	-	ESAT-6 like protein EsxP	3	3	2055.3	893.9	-1161.4	-1.2	0.0392	0.9198
Rv3419c	-	O-sialoglycoprotein endopeptidase Gcp	18	15	9752.1	2437.8	-7314.3	-2	0.04	0.9332
Rv1235	-	sugar-binding lipoprotein LpqY	30	18	15182.8	26552.1	11369.3	0.81	0.0406	0.9417
Rv1307	-	ATP synthase delta chain AtpH	20	7	7	1.2	-5.8	-2.57	0.0409	0.9433
Rv2669	-	N-acetyltransferase	8	6	756.5	1842.7	1086.2	1.28	0.0416	0.9446
Rv3145	-	NADH dehydrogenase subunit A NuoA	12	10	27170	49257.8	22087.8	0.86	0.0416	0.9446
Rv2577	-	hypothetical protein	41	33	36297.9	21958.3	-14339.7	-0.73	0.0421	0.9446
Rv0019c	-	FHA domain-containing protein FhaB	13	13	13868.5	6823.3	-7045.2	-1.02	0.0422	0.9446
Rv0058	-	replicative DNA helicase DnaB	39	8	7.9	1.6	-6.3	-2.33	0.0422	0.9446
Rv0069c	-	l-serine dehydratase SdaA	12	10	5961.2	12634.5	6673.4	1.08	0.0427	0.9446
Rv3295	-	transcriptional regulator TetR-family	12	11	48942.9	24596.3	-24346.6	-0.99	0.0427	0.9446
Rv0118c	-	oxalyl-CoA decarboxylase OxcA	26	23	9418.8	14867.4	5448.6	0.66	0.043	0.9446
Rv0283	-	ESX-3 secretion system protein EccB3	24	7	10	2.8	-7.2	-1.85	0.0432	0.9446
Rv0643c	-	methoxy mycolic acid synthase 3 MmaA3	22	20	53380.1	30568.5	-22811.6	-0.8	0.0433	0.9446
Rv3830c	-	transcriptional regulator	12	10	3428.6	5919.8	2491.2	0.79	0.0442	0.9553
Rv0629c	-	exonuclease V alpha chain RecD	16	14	3254	7359	4104.9	1.18	0.0444	0.9553
Rv3723	-	transmembrane protein	10	9	36539.1	17539.1	-19000	-1.06	0.0445	0.9553
Rv1181	-	polyketide beta-ketoacyl synthase Pks4	96	69	54626.2	41477.8	-13148.4	-0.4	0.0449	0.958
Rv0462	-	dihydrolipoamide dehydrogenase LpdC	27	5	5.9	0	-5.9	-0.97	0.0451	0.958	*
Rv2716	-	phenazine biosynthesis protein PhzF	11	8	5775.3	25539.2	19763.8	2.14	0.0454	0.9586
Rv2564	-	glutamine-transport ABC transporter ATP-binding protein GlnQ	15	10	75.1	687.3	612.2	3.19	0.0456	0.9586
Rv2049c	-	hypothetical protein	1	1	1927.2	152.8	-1774.5	-3.66	0.0464	0.9606
Rv3079c	-	hypothetical protein	18	13	26860.5	16068.1	-10792.4	-0.74	0.0464	0.9606
Rv3922c	-	hemolysin	11	7	552.2	1284.1	731.8	1.22	0.0466	0.9606
Rv1622c	-	integral membrane cytochrome D ubiquinol oxidase CydB	22	14	5365.5	1148.9	-4216.6	-2.22	0.0468	0.9606
Rv2593c	-	holliday junction DNA helicase RuvA	6	4	0	11	11	1.88	0.0469	0.9606
Rv0736	-	anti-sigma factor RslA	9	5	64.6	341	276.4	2.4	0.0473	0.9606
Rv0408	-	phosphate acetyltransferase Pta	44	36	20667.7	33444.8	12777.1	0.69	0.0474	0.9606
Rv0239	-	antitoxin VapB24	2	2	2399.6	1090.5	-1309	-1.14	0.0476	0.9606
Rv3805c	-	arabinofuranosyltransferase AftB	41	18	1761.3	9.5	-1751.9	-7.54	0.048	0.9638
Rv0822c	-	hypothetical protein	29	26	43447.8	60859.5	17411.7	0.49	0.0483	0.965
Rv2982c	-	glycerol-3-phosphate dehydrogenase GpdA2	13	10	8122.5	13479.3	5356.8	0.73	0.0492	0.9782
Rv2381c	-	mycobactin polyketide synthetase MbtD	43	23	34.7	177.8	143	2.36	0.0505	0.9982
Rv3590c	-	PE-PGRS family protein PE_PGRS58	23	21	3736.4	7039.9	3303.6	0.91	0.0507	0.9982
Rv0831c	-	hypothetical protein	19	19	23762.9	33412.3	9649.4	0.49	0.0515	1
Rv3180c	-	alanine rich protein	6	6	2733.5	5964.9	3231.4	1.13	0.0516	1
Rv2318	-	periplasmic sugar-binding lipoprotein UspC	31	21	16058.9	8432.2	-7626.8	-0.93	0.0522	1
Rv3614c	-	ESX-1 secretion-associated protein EspD	9	8	33806.1	13075.4	-20730.7	-1.37	0.053	1
Rv3541c	-	hypothetical protein	9	6	3243.8	369	-2874.8	-3.14	0.0534	1
Rv2604c	-	glutamine amidotransferase SnoP	4	3	743.4	2654.6	1911.2	1.84	0.0544	1
Rv0974c	-	acetyl-/propionyl-CoA carboxylase beta subunit AccD2	20	12	2649.9	5035.9	2386	0.93	0.0545	1
Rv1664	-	polyketide synthase Pks9	47	33	10829	15946.2	5117.2	0.56	0.0549	1
Rv3373	-	enoyl-CoA hydratase EchA18	2	2	630.8	1402	771.2	1.15	0.0566	1
Rv1926c	-	immunogenic protein MPT63	8	8	5993.9	12400.4	6406.5	1.05	0.057	1
Rv1238	-	sugar-transport ABC transporter ATP-binding protein	26	20	12526.5	19953.4	7426.9	0.67	0.0579	1
Rv3211	-	ATP-dependent RNA helicase RhlE	24	9	5	79.5	74.5	3.99	0.058	1
Rv3146	-	NADH dehydrogenase subunit B NuoB	9	8	10485.8	24343.5	13857.7	1.22	0.0587	1
Rv1186c	-	hypothetical protein	18	11	10715.3	4116.8	-6598.5	-1.38	0.0606	1
Rv0037c	-	integral membrane protein	20	18	79195.8	48456	-30739.8	-0.71	0.0609	1
Rv0310c	-	hypothetical protein	12	10	1994.3	4480.1	2485.8	1.17	0.0609	1
Rv3502c	-	3-oxoacyl-[acyl-carrier protein] reductase	15	14	25926.9	15313.5	-10613.4	-0.76	0.0612	1
Rv0615	-	membrane protein	5	5	4420.1	9196.2	4776.1	1.06	0.0614	1
Rv1070c	-	enoyl-CoA hydratase EchA8	9	7	2287.8	4615.8	2328	1.01	0.0614	1
Rv1281c	-	oligopeptide-transport ABC transporter ATP-binding protein OppD	28	20	17432.8	10864.9	-6567.9	-0.68	0.0619	1
Rv2514c	-	hypothetical protein	8	4	1160.6	3027.9	1867.3	1.38	0.0638	1
Rv2513	-	hypothetical protein	9	8	5618.8	14419.3	8800.5	1.36	0.0639	1
Rv0669c	-	hydrolase	37	31	49074.3	35118.3	-13956	-0.48	0.0644	1
Rv3210c	-	hypothetical protein	11	9	16461.3	6523.3	-9938.1	-1.34	0.0644	1
Rv1633	-	excinuclease ABC UvrB	38	34	21887.5	15706.4	-6181.1	-0.48	0.0645	1
Rv3625c	-	cell cycle protein MesJ	8	1	272.5	72.4	-200.1	-1.91	0.0646	1
Rv2038c	-	cellobiose transporter ATP-binding protein	18	15	5366.7	9405.4	4038.6	0.81	0.065	1
Rv3575c	-	transcriptional regulator	20	19	36501	21799.2	-14701.8	-0.74	0.0655	1
Rv3557c	-	transcriptional regulator	13	9	5565	2388.2	-3176.8	-1.22	0.0656	1
Rv1454c	-	quinone reductase Qor	17	15	25429.8	36629.7	11199.9	0.53	0.0671	1
Rv1916	-	isocitrate lyase AceAb	17	14	24093.3	15525.5	-8567.8	-0.63	0.0672	1
Rv0545c	-	inorganic phosphate transporter integral membrane protein PitA	14	13	4313.1	1966.1	-2347	-1.13	0.0673	1
Rv3023c	-	transposase	16	8	529.1	1171.2	642	1.15	0.0674	1
Rv1083	-	hypothetical protein	4	4	2878.1	466.5	-2411.6	-2.63	0.0676	1
Rv1343c	-	lipoprotein LprD	12	1	1075.7	127	-948.6	-3.08	0.0677	1
Rv0370c	-	oxidoreductase	21	17	12420.7	7093.3	-5327.4	-0.81	0.0678	1
Rv2873A	-	prevent-host-death family protein	1	1	27.6	490.8	463.2	4.15	0.0689	1
Rv2941	-	fatty-acid-AMP ligase FadD28	47	11	11.9	257.4	245.5	4.44	0.0689	1
Rv0833	-	PE-PGRS family protein PE_PGRS13	12	9	2588.8	815	-1773.9	-1.67	0.0696	1
Rv0926c	-	dihydrodipicolinate reductase	21	21	10687	16482.2	5795.2	0.63	0.0696	1
Rv1291c	-	secreted protein	3	3	942.3	3045.1	2102.8	1.69	0.0696	1
Rv2727c	-	tRNA delta(2)-isopentenylpyrophosphate transferase MiaA	14	6	18	2.9	-15.1	-2.64	0.0698	1
Rv1056	-	hypothetical protein	23	23	23265.3	34217.7	10952.4	0.56	0.0714	1
Rv1106c	-	3-beta-hydroxysteroid dehydrogenase	18	17	28738.8	19460.1	-9278.7	-0.56	0.0715	1
Rv1287	-	Rrf2 family protein	13	12	1330.1	2940.7	1610.7	1.14	0.0723	1
Rv2685	-	arsenic-transport integral membrane protein ArsB1	15	13	6347.2	10089.6	3742.3	0.67	0.0724	1
Rv2040c	-	sugar-transport ABC transporter permease	18	15	7669.1	11563.3	3894.2	0.59	0.0725	1
Rv3545c	-	cytochrome P450 125 Cyp125	24	16	21444.8	12558.9	-8885.9	-0.77	0.073	1
Rv0799c	-	dyp-type peroxidase	16	13	4820.2	2258.7	-2561.6	-1.09	0.0732	1	*
Rv0020c	-	FHA domain-containing protein FhaA	52	20	9041.4	3604.6	-5436.8	-1.33	0.0747	1
Rv0668	-	DNA-directed RNA polymerase RpoC	52	15	7048.4	3424.2	-3624.2	-1.04	0.075	1
Rv0392c	-	NADH dehydrogenase NdhA	16	13	5529.5	2420.9	-3108.6	-1.19	0.0752	1
Rv0494	-	transcriptional regulator GntR-family	8	8	3448.3	6767	3318.7	0.97	0.0752	1
Rv1227c	-	transmembrane protein	6	5	8988.4	3634.6	-5353.8	-1.31	0.0752	1
Rv2609c	-	membrane protein	13	8	16333.2	5773.4	-10559.9	-1.5	0.0753	1
Rv3481c	-	membrane protein	8	7	7952.2	3731.1	-4221.1	-1.09	0.0753	1
Rv3254	-	hypothetical protein	20	17	19414.1	26392.7	6978.6	0.44	0.0756	1
Rv1713	-	GTP-binding protein EngA	12	4	4	0	-4	-0.41	0.0765	1
Rv1087	-	PE-PGRS family protein PE_PGRS21	22	21	19543	11140.8	-8402.2	-0.81	0.077	1
Rv1299	-	peptide chain release factor 1 PrfA	14	5	5.9	1.2	-4.7	-2.32	0.0772	1
Rv3464	-	dTDP-glucose 4,6-dehydratase RmlB	19	6	6.9	1.2	-5.7	-2.55	0.0773	1
Rv2018	-	hypothetical protein	14	8	816.3	2154.6	1338.3	1.4	0.0776	1
Rv2138	-	lipoprotein LppL	19	4	4	0	-4	-0.41	0.0778	1
Rv3438	-	hypothetical protein	10	10	8119.4	13290.8	5171.4	0.71	0.0778	1
Rv2633c	-	hypothetical protein	13	12	8382.8	4803.9	-3578.9	-0.8	0.0781	1
Rv1462	-	Fe-S cluster assembly protein SufD	14	4	4	0	-4	-0.41	0.0783	1
Rv3325	-	transposase	5	5	499	1261.1	762.1	1.34	0.0794	1
Rv3302c	-	glycerol-3-phosphate dehydrogenase GlpD2	28	9	8	2.9	-5.1	-1.47	0.0797	1
Rv0839	-	hypothetical protein	15	13	21069.1	13658.9	-7410.2	-0.63	0.08	1
Rv3130c	-	triacylglycerol synthase (diacylglycerol acyltransferase) Tgs1	27	20	19780.3	13393.5	-6386.8	-0.56	0.0801	1
Rv3906c	-	hypothetical protein	8	7	3533.6	7849.7	4316.1	1.15	0.0805	1
Rv1933c	-	acyl-CoA dehydrogenase FadE18	10	10	13109.8	5550.7	-7559.1	-1.24	0.0808	1
Rv0682	-	30S ribosomal protein S12 RpsL	8	3	4	0	-4	-0.41	0.0813	1
Rv2999	-	lipoprotein LppY	12	9	2347.5	4486.4	2138.9	0.93	0.0822	1
Rv0355c	-	PPE family protein PPE8	172	147	182179	211276	29097.3	0.21	0.0823	1
Rv2715	-	hydrolase	19	17	11061.8	17268.6	6206.9	0.64	0.0827	1
Rv1641	-	initiation factor if-3 InfC	12	6	6	1.3	-4.7	-2.19	0.0831	1
Rv1627c	-	nonspecific lipid-transfer protein	19	15	15438.4	9251.2	-6187.2	-0.74	0.0832	1
Rv2052c	-	hypothetical protein	21	18	29876	17772.3	-12103.8	-0.75	0.0835	1
Rv3496c	-	MCE-family protein Mce4D	28	23	50218.3	33243.6	-16974.7	-0.6	0.0837	1
Rv0994	-	molybdopterin biosynthesis protein MoeA1	14	10	2533.4	4321.8	1788.4	0.77	0.0847	1
Rv1301	-	Sua5/YciO/YrdC/YwlC family protein	11	4	4	0	-4	-0.42	0.0851	1
Rv0225	-	glycosyltransferase	20	7	7	1.3	-5.7	-2.41	0.0856	1
Rv0199	-	membrane protein	12	11	38169.1	13153.5	-25015.6	-1.54	0.0861	1
Rv3244c	-	lipoprotein LpqB	21	11	16	6.3	-9.7	-1.34	0.0861	1
Rv2288	-	hypothetical protein	5	5	13020.5	5860.7	-7159.9	-1.15	0.0865	1
Rv3539	-	PPE family protein PPE63	32	28	24545.8	16656.7	-7889.2	-0.56	0.0865	1
Rv0132c	-	F420-dependent glucose-6-phosphate dehydrogenase Fgd2	15	15	27593.3	17081.3	-10512	-0.69	0.0868	1
Rv3001c	-	ketol-acid reductoisomerase IlvC	14	6	6	1.2	-4.8	-2.34	0.087	1
Rv2995c	-	3-isopropylmalate dehydrogenase LeuB	10	6	5.9	1.2	-4.8	-2.33	0.0875	1
Rv1621c	-	thiol reductant ABC exporter subunit CydD	20	13	3402.2	264.5	-3137.7	-3.69	0.0884	1
Rv0540	-	hypothetical protein	11	8	8410.9	4075.3	-4335.6	-1.05	0.089	1
Rv0530	-	hypothetical protein	18	14	31351.4	21724.7	-9626.7	-0.53	0.0891	1
Rv0290	-	ESX-3 secretion system protein EccD3	19	6	2	12.9	10.9	2.69	0.0893	1
Rv1695	-	inorganic polyphosphate/ATP-NAD kinase PpnK	8	4	5	0	-5	-0.73	0.0895	1
Rv0316	-	muconolactone delta-isomerase	8	5	4153.1	9226.4	5073.3	1.15	0.0896	1
Rv2231c	-	histidinol-phosphate aminotransferase CobC	16	12	6003.1	2852.7	-3150.4	-1.07	0.0896	1
Rv1797	-	ESX-5 secretion system protein EccE5	15	6	2	7.4	5.4	1.9	0.0899	1
Rv2338c	-	molybdopterin biosynthesis protein MoeW	37	16	2419	4590.6	2171.6	0.92	0.0899	1
Rv0001	-	chromosomal replication initiator protein DnaA	31	6	6	1.2	-4.8	-2.34	0.0904	1
Rv0534c	-	1,4-dihydroxy-2-naphthoate octaprenyltransferase MenA	11	4	3.9	0	-3.9	-0.4	0.0904	1
Rv1588c	-	13E12 repeat family protein	11	5	39.1	6.6	-32.5	-2.57	0.0909	1
Rv0900	-	membrane protein	2	2	583.1	1188.5	605.3	1.03	0.0912	1
Rv1553	-	fumarate reductase FrdB	14	12	23462.3	12388.3	-11074	-0.92	0.0918	1
Rv0094c	-	hypothetical protein	14	13	2389.7	4659.4	2269.7	0.96	0.0924	1
Rv2016	-	hypothetical protein	7	7	3486.3	6027	2540.7	0.79	0.0933	1
Rv1204c	-	hypothetical protein	16	16	20566.9	28678.3	8111.4	0.48	0.0935	1
Rv2194	-	ubiquinol-cytochrome C reductase QcrC	12	4	1	5.3	4.2	2.37	0.0935	1
Rv0891c	-	transcriptional regulator	26	22	13450	19316.8	5866.8	0.52	0.0946	1
Rv1348	-	iron-regulated transporter IrtA	38	15	477	103.9	-373.1	-2.2	0.0948	1
Rv2737A	-	cysteine rich protein	3	1	0	264.3	264.3	6.46	0.0949	1
Rv2409c	-	hypothetical protein	20	18	19688.6	11952.7	-7735.9	-0.72	0.0957	1
Rv2242	-	hypothetical protein	17	6	4	89.9	85.8	4.47	0.0963	1
Rv1007c	-	methionyl-tRNA synthetase MetS	31	7	5.9	1.6	-4.4	-1.92	0.0969	1
Rv2512c	-	transposase	16	6	801.3	1746.2	945	1.12	0.097	1
Rv2217	-	lipoate biosynthesis protein B LipB	12	3	253.4	826	572.6	1.7	0.0973	1
Rv2427c	-	gamma-glutamyl phosphate reductase ProA	16	14	11978.7	7939.2	-4039.5	-0.59	0.0976	1
Rv2457c	-	ATP-dependent Clp protease ATP-binding subunit ClpX	19	4	1	5.3	4.2	2.37	0.0976	1
Rv3840	-	transcriptional regulator	19	12	16907.9	10166.8	-6741.1	-0.73	0.0976	1
Rv0850	-	transposase	10	8	9518.9	5716	-3802.9	-0.74	0.0978	1
Rv2304c	-	hypothetical protein	1	1	64.7	884.9	820.3	3.77	0.098	1
Rv3272	-	hypothetical protein	19	16	27999.9	40814.6	12814.8	0.54	0.0982	1
Rv0466	-	hypothetical protein	8	7	11516.5	7759.9	-3756.7	-0.57	0.0986	1
Rv0801	-	hypothetical protein	2	1	2307.2	4217.3	1910.1	0.87	0.0994	1
Rv3632	-	membrane protein	11	10	10639.6	20065.4	9425.8	0.92	0.0999	1
Rv0051	-	transmembrane protein	34	29	19505.8	30961.9	11456.1	0.67	0.1	1
Rv3243c	-	hypothetical protein	4	4	2521.1	1008.5	-1512.7	-1.32	0.1	1
Rv1379	-	pyrimidine operon regulatory protein PyrR	7	1	0	7.2	7.2	1.27	0.1003	1
Rv1846c	-	transcriptional regulator BlaI	3	3	593.8	1385.9	792.1	1.22	0.1003	1
Rv3182	-	hypothetical protein	1	1	188.4	414	225.7	1.14	0.1005	1
Rv3497c	-	MCE-family protein Mce4C	17	14	28717.4	20492.2	-8225.1	-0.49	0.1005	1
Rv0879c	-	transmembrane protein	3	2	819.5	3286.8	2467.3	2	0.1006	1
Rv1241	-	antitoxin VapB33	1	1	80.9	296.2	215.4	1.87	0.1007	1
Rv3460c	-	30S ribosomal protein S13 RpsM	7	1	0	40.8	40.8	3.77	0.1007	1
Rv0017c	-	cell division protein RodA	27	21	3068.3	1414.4	-1653.9	-1.12	0.1013	1
Rv1786	-	oxidoreductase	1	1	4985.3	5986.3	1001	0.26	0.1015	1
Rv3765c	-	two-component system transcriptional regulator TcrX	14	13	16058.5	22296.8	6238.4	0.47	0.1017	1
Rv2292c	-	hypothetical protein	3	3	3055.3	1668.2	-1387.1	-0.87	0.1019	1
Rv1991c	-	toxin MazF6	6	6	5865.5	9319	3453.5	0.67	0.1026	1
Rv1006	-	hypothetical protein	42	38	10766.2	15378.7	4612.6	0.51	0.1028	1
Rv2046	-	lipoprotein LppI	10	10	17646.3	12252.4	-5393.9	-0.53	0.1031	1
Rv1116	-	hypothetical protein	3	3	5470.6	2231.9	-3238.7	-1.29	0.1034	1
Rv3640c	-	transposase	18	16	4946.2	7943.3	2997.1	0.68	0.1034	1
Rv1661	-	polyketide synthase Pks7	82	52	19557.3	31468.7	11911.4	0.69	0.1035	1
Rv0385	-	oxidoreductase	20	18	47716.5	65221.7	17505.1	0.45	0.1038	1
Rv0257	-	hypothetical protein	3	3	1446	3088.3	1642.3	1.09	0.1046	1
Rv3923c	-	ribonuclease P protein component RnpA	7	4	91.3	1.3	-89.9	-6.12	0.1048	1
Rv1034c	-	transposase	2	2	252.8	707.2	454.4	1.48	0.105	1
Rv0252	-	nitrite reductase [NAD(P)H] large subunit NirB	41	36	20587.4	28372.9	7785.5	0.46	0.1052	1
Rv3551	-	coA-transferase	15	10	5406	1678	-3728	-1.69	0.1054	1
Rv0314c	-	membrane protein	7	6	34187.4	19269.6	-14917.8	-0.83	0.1056	1
Rv3873	-	PPE family protein PPE68	15	15	31838.6	17611.8	-14226.8	-0.85	0.106	1
Rv2346c	-	ESAT-6 like protein EsxO	3	3	1792	666.5	-1125.4	-1.43	0.1063	1
Rv0503c	-	cyclopropane mycolic acid synthase 2 CmaA2	20	20	107529	66933.8	-40595.1	-0.68	0.1071	1
Rv1209	-	DivIVA family protein	5	5	13297.9	19452.1	6154.2	0.55	0.1078	1
Rv1735Ac	-	hypothetical protein	4	4	6876.9	3021.3	-3855.5	-1.19	0.1078	1
Rv0609A	-	hypothetical protein	2	2	2124.7	1116.6	-1008.1	-0.93	0.1085	1
Rv3587c	-	membrane protein	18	9	21.9	219.4	197.6	3.33	0.1098	1
Rv0630c	-	exonuclease V beta chain RecB	34	27	15122.5	20795.5	5673	0.46	0.1103	1
Rv3157	-	NADH dehydrogenase subunit M NuoK	33	22	12707.6	19627	6919.4	0.63	0.1103	1
Rv3841	-	bacterioferritin BfrB	6	6	76030.9	36407.5	-39623.4	-1.06	0.1104	1
Rv0593	-	MCE-family lipoprotein LprL	19	15	8530.4	12362.2	3831.7	0.54	0.1106	1
Rv1488	-	exported protein	16	14	27133.8	37319.5	10185.7	0.46	0.1107	1
Rv3006	-	lipoprotein LppZ	17	6	5	542.1	537.1	6.77	0.1109	1
Rv0183	-	lysophospholipase	16	14	58046.7	41714.4	-16332.3	-0.48	0.1113	1
Rv1093	-	serine hydroxymethyltransferase 1 GlyA1	14	4	6	1.2	-4.8	-2.34	0.1117	1
Rv2876	-	transmembrane protein	2	2	205.9	1042.1	836.2	2.34	0.1117	1
Rv0165c	-	transcriptional regulator Mce1R	6	5	12273.6	7000.9	-5272.7	-0.81	0.1121	1
Rv3548c	-	oxidoreductase	9	7	4554.1	7221.1	2667	0.67	0.1124	1
Rv3395A	-	membrane protein	11	10	12617.3	18372.8	5755.4	0.54	0.1131	1
Rv3771c	-	hypothetical protein	5	4	7724	4132	-3592	-0.9	0.1137	1
Rv2938	-	ABC transporter efflux protein DrrB	26	23	37557.1	57646	20088.8	0.62	0.114	1
Rv2141c	-	hypothetical protein	21	18	28424.6	20117.6	-8307	-0.5	0.115	1
Rv2163c	-	penicillin-binding membrane protein PbpB	29	8	8.1	2.6	-5.4	-1.62	0.1157	1
Rv3537	-	3-oxosteroid 1-dehydrogenase	41	25	13965.3	8856.6	-5108.8	-0.66	0.1158	1
Rv1272c	-	ABC transporter membrane protein	31	27	24081.5	15652	-8429.5	-0.62	0.117	1
Rv3743c	-	cation transporter P-type ATPase CtpJ	37	28	24750.9	33972.3	9221.4	0.46	0.1178	1
Rv2077A	-	hypothetical protein	7	6	6855.8	11728.7	4872.9	0.77	0.1184	1
Rv2214c	-	short-chain dehydrogenase EphD	31	31	42151.4	31205.4	-10946.1	-0.43	0.1186	1
Rv0961	-	membrane protein	7	6	1896.6	3548.8	1652.2	0.9	0.119	1
Rv2666	-	transposase	12	11	3003.1	5212.9	2209.8	0.8	0.1191	1
Rv2259	-	s-nitrosomycothiol reductase MscR	14	8	10	39	29	1.96	0.1197	1
Rv2330c	-	lipoprotein LppP	7	6	1178.6	2987.2	1808.6	1.34	0.1199	1
Rv1115	-	exported protein	18	11	16264.9	11293.7	-4971.2	-0.53	0.1209	1
Rv3642c	-	hypothetical protein	3	3	1646.7	3581.5	1934.8	1.12	0.1215	1
Rv2573	-	2-dehydropantoate 2-reductase	6	5	5490.4	10097.3	4606.8	0.88	0.1221	1
Rv0204c	-	transmembrane protein	19	17	11005.4	7475.1	-3530.2	-0.56	0.1222	1
Rv0814c	-	hypothetical protein	3	3	265	1025.4	760.4	1.95	0.1223	1
Rv0878c	-	PPE family protein PPE13	19	19	25789.3	37145.5	11356.2	0.53	0.1224	1
Rv0126	-	trehalose synthase TreS	30	11	8.9	3.9	-5	-1.17	0.1227	1
Rv2165c	-	ribosomal RNA small subunit methyltransferase H	23	15	2502.4	934.1	-1568.3	-1.42	0.1233	1
Rv0789c	-	hypothetical protein	7	6	3303.6	5669.6	2366	0.78	0.1241	1
Rv1560	-	antitoxin VapB11	2	2	31.4	424.6	393.2	3.76	0.1241	1
Rv0646c	-	lipase/esterase LipG	10	8	24975.5	14338.8	-10636.7	-0.8	0.1245	1
Rv1889c	-	hypothetical protein	3	2	118.8	906.3	787.5	2.93	0.1248	1
Rv1020	-	transcription-repair coupling factor Mfd	40	37	55866.4	41118.4	-14748	-0.44	0.125	1
Rv0660c	-	antitoxin MazE2	2	2	2007.6	798.4	-1209.3	-1.33	0.1255	1
Rv3919c	-	glucose-inhibited division protein B Gid	14	12	10820.1	6016.2	-4803.9	-0.85	0.1257	1
Rv1027c	-	potassium-transporting transcriptional regulator KdpE	11	8	5713.3	2675.3	-3038	-1.09	0.1259	1
Rv2303c	-	antibiotic-resistance protein	19	15	22238.8	30890.6	8651.8	0.47	0.1263	1
Rv0483	-	lipoprotein LprQ	30	27	38310.8	27656.5	-10654.3	-0.47	0.1272	1
Rv3433c	-	hypothetical protein	10	8	4098.7	2128.5	-1970.2	-0.95	0.1287	1
Rv3501c	-	ABC transporter permease YrbE4A	9	7	7475.4	3741.5	-3733.9	-1	0.1287	1
Rv0143c	-	CIC family chloride channel protein	28	25	34269.1	24369.2	-9899.9	-0.49	0.1289	1
Rv1536	-	isoleucyl-tRNA synthetase IleS	79	26	20.9	11.8	-9.1	-0.82	0.1294	1
Rv3526	-	3-ketosteroid-9-alpha-hydroxylase oxygenase component KshA	19	17	10090.3	6179.7	-3910.6	-0.71	0.1308	1
Rv3109	-	molybdenum cofactor biosynthesis protein A1 MoaA1	41	19	4156.9	6206.3	2049.4	0.58	0.1309	1
Rv0220	-	esterase LipC	24	22	14359.9	9071.3	-5288.6	-0.66	0.1311	1
Rv2474c	-	hypothetical protein	14	11	1147.7	502.5	-645.2	-1.19	0.1319	1
Rv3667	-	acetyl-CoA synthetase Acs	40	35	52883.6	40533.4	-12350.3	-0.38	0.1324	1
Rv3208	-	transcriptional regulator TetR-family	10	7	863.7	162.4	-701.3	-2.41	0.1325	1
Rv1517	-	hypothetical protein	15	9	3568.5	6227.2	2658.7	0.8	0.1328	1
Rv0886	-	NADPH:adrenodoxin oxidoreductase FprB	26	22	26394.7	19105.2	-7289.5	-0.47	0.1329	1
Rv2203	-	membrane protein	15	13	13460.9	8835.8	-4625.2	-0.61	0.1332	1
Rv0095c	-	hypothetical protein	10	6	3690.3	1438.3	-2252	-1.36	0.1334	1
Rv3003c	-	acetolactate synthase IlvB	15	5	8	2.9	-5.1	-1.47	0.1338	1
Rv3708c	-	aspartate-semialdehyde dehydrogenase Asd	11	5	6	1.3	-4.7	-2.19	0.1346	1
Rv2477c	-	ChvD family ATP-binding cassette protein	27	8	6.9	2.8	-4.1	-1.32	0.1351	1
Rv2805	-	hypothetical protein	3	3	1102.8	2546.6	1443.8	1.21	0.1354	1
Rv0470c	-	mycolic acid synthase PcaA	12	9	34.5	142.6	108.1	2.05	0.1363	1
Rv1411c	-	lipoprotein LprG	9	8	3203.7	1647.1	-1556.6	-0.96	0.1364	1
Rv2681	-	ribonuclease D	20	13	619.5	1530.4	911	1.3	0.1367	1
Rv0014c	-	transmembrane serine/threonine-protein kinase B PknB	24	5	6.1	1.3	-4.8	-2.21	0.137	1
Rv1430	-	PE family protein PE16	40	36	28741.9	37871.3	9129.4	0.4	0.137	1
Rv0932c	-	periplasmic phosphate-binding lipoprotein PstS2	25	22	30139.4	42800.1	12660.7	0.51	0.1371	1
Rv2023c	-	hypothetical protein	2	2	1650.4	2888.2	1237.8	0.81	0.1371	1
Rv1674c	-	transcriptional regulator	9	7	12684.3	5923.4	-6760.8	-1.1	0.1372	1
Rv1617	-	pyruvate kinase PykA	14	7	182.5	3.1	-179.4	-5.86	0.1374	1
Rv3579c	-	RNA methyltransferase	13	3	5	0	-5	-0.74	0.1381	1
Rv2295	-	hypothetical protein	12	9	16989.4	9630	-7359.3	-0.82	0.1385	1
Rv2367c	-	metalloprotein, YbeY/UPF0054family	9	3	1638.7	2820.2	1181.5	0.78	0.1387	1
Rv3887c	-	ESX-2 secretion system protein EccD2	32	22	31789.7	20827.6	-10962.1	-0.61	0.1391	1
Rv3463	-	hypothetical protein	22	17	18460.8	12204.6	-6256.3	-0.6	0.1393	1
Rv0339c	-	transcriptional regulator	30	22	12711.6	18420.4	5708.8	0.54	0.1394	1
Rv3229c	-	stearoyl-CoA 9-desaturase	25	23	12392	17389.3	4997.3	0.49	0.1398	1
Rv1072	-	transmembrane protein	18	15	1803	5051.3	3248.4	1.49	0.1403	1
Rv1947	-	hypothetical protein	6	5	11380.2	5148.2	-6232	-1.14	0.1403	1
Rv3115	-	transposase	16	6	712.2	1624.4	912.2	1.19	0.1408	1
Rv3236c	-	CPA2 family monovalent cation:H+ antiporter-2	15	13	21055.1	10572.6	-10482.4	-0.99	0.1408	1
Rv3340	-	O-acetylhomoserine sulfhydrylase MetC	16	10	7619	3728.8	-3890.1	-1.03	0.1408	1
Rv3274c	-	acyl-CoA dehydrogenase FadE25	19	9	7	2.5	-4.5	-1.49	0.1413	1
Rv1608c	-	peroxidoxin BcpB	8	6	4954.4	3022.8	-1931.6	-0.71	0.1414	1
Rv3777	-	oxidoreductase	14	13	6676.9	2996.7	-3680.2	-1.16	0.1418	1
Rv2560	-	proline and glycine rich transmembrane protein	25	24	41652	30846.9	-10805	-0.43	0.142	1
Rv1196	-	PPE family protein PPE18	11	9	10207.2	16797.8	6590.7	0.72	0.1421	1
Rv2420c	-	iojap-like ribosome-associated protein	5	2	7	147.9	140.9	4.39	0.1421	1
Rv1769	-	hypothetical protein	23	17	26832	19671.5	-7160.5	-0.45	0.1429	1
Rv2878c	-	soluble secreted antigen MPT53	7	6	3682.8	6769.7	3086.9	0.88	0.1429	1
Rv2760c	-	antitoxin VapB42	3	3	5279.7	2154.4	-3125.4	-1.29	0.1443	1
Rv0611c	-	hypothetical protein	12	10	3518.4	7145.3	3626.9	1.02	0.1445	1
Rv1270c	-	lipoprotein LprA	11	11	8432.5	5303.8	-3128.7	-0.67	0.1445	1
Rv1849	-	urease beta subunit UreB	6	4	1611	3161	1550	0.97	0.1451	1
Rv0889c	-	citrate synthase II CitA	13	12	9265.3	13365.2	4099.9	0.53	0.1458	1
Rv3030	-	3-demethylubiquinone-9 3-methyltransferase	11	5	682.4	84.1	-598.4	-3.02	0.1459	1
Rv3264c	-	mannose-1-phosphate guanylyltransferase ManB	17	6	7	1341.4	1334.4	7.59	0.146	1
Rv0502	-	hypothetical protein	19	15	22029.4	13924.4	-8105	-0.66	0.1465	1
Rv0148	-	oxidoreductase	16	15	26554.1	18346.3	-8207.8	-0.53	0.1467	1
Rv0057	-	hypothetical protein	15	13	3278.5	5793.9	2515.3	0.82	0.147	1
Rv0005	-	DNA gyrase subunit B GyrB	39	9	7	2.9	-4.1	-1.28	0.1473	1
Rv2009	-	antitoxin VapB15	3	2	5660.8	2077.1	-3583.7	-1.45	0.1478	1
Rv0591	-	MCE-family protein Mce2C	22	19	23742.9	15006.6	-8736.3	-0.66	0.1482	1
Rv2887	-	transcriptional regulator	8	7	873.8	1885	1011.2	1.11	0.1488	1
Rv1925	-	acyl-CoA ligase FadD31	40	37	189688	150176	-39511.6	-0.34	0.1493	1
Rv0361	-	membrane protein	8	5	2	25.7	23.7	3.68	0.1496	1
Rv3307	-	purine nucleoside phosphorylase DeoD	11	11	6349.3	9599	3249.7	0.6	0.1496	1
Rv1810	-	hypothetical protein	13	12	34055	22097.9	-11957.1	-0.62	0.1501	1
Rv0751c	-	3-hydroxyisobutyrate dehydrogenase MmsB	7	6	16575.5	7738.4	-8837	-1.1	0.1516	1
Rv0679c	-	threonine rich protein	6	5	3563.1	5532.8	1969.7	0.63	0.1517	1
Rv3190A	-	hypothetical protein	8	7	10031.5	14616.6	4585.1	0.54	0.1521	1
Rv0640	-	50S ribosomal protein L11 RplK	6	3	3.9	32.8	28.9	3.06	0.1522	1
Rv0177	-	MCE-associated membrane protein	12	10	13936.7	7819.2	-6117.5	-0.83	0.1523	1
Rv3348	-	transposase	5	5	221	898.8	677.8	2.02	0.1525	1
Rv3523	-	lipid carrier protein or keto acyl-CoA thiolase Ltp3	20	19	10917.6	15345.8	4428.1	0.49	0.1528	1
Rv1265	-	hypothetical protein	12	5	252.6	565.5	312.9	1.16	0.1529	1
Rv1638	-	excinuclease ABC UvrA	39	36	9886.9	6373.9	-3513	-0.63	0.1533	1
Rv0870c	-	integral membrane protein	6	6	5030.7	3259.7	-1771	-0.63	0.1537	1
Rv0192	-	hypothetical protein	14	13	27551.3	36931.3	9380	0.42	0.1539	1
Rv2212	-	adenylate cyclase	10	9	14158.5	8237.1	-5921.4	-0.78	0.1544	1
Rv2684	-	arsenic-transport integral membrane protein ArsA	20	19	2112.8	3029.4	916.7	0.52	0.1548	1
Rv0145	-	s-adenosylmethionine-dependent methyltransferase	15	13	9545.7	13299.2	3753.5	0.48	0.1551	1
Rv2687c	-	antibiotic-transport ABC transporter	12	11	5793.4	9711.9	3918.5	0.75	0.1552	1
Rv1130	-	2-methylcitrate dehydratase PrpD	27	21	31162.4	19988.3	-11174	-0.64	0.1558	1
Rv1591	-	transmembrane protein	9	8	12211.6	18253.7	6042.1	0.58	0.156	1
Rv0945	-	oxidoreductase	8	6	9889.6	4112.3	-5777.3	-1.27	0.1561	1
Rv3057c	-	short-chain alcohol dehydrogenase/reductase	19	16	17091.3	22928	5836.7	0.42	0.1561	1
Rv0749	-	toxin VapC31	5	5	4458.9	6639.1	2180.2	0.57	0.1563	1
Rv3569c	-	4,5-9,10-diseco-3-hydroxy-5,9, 17-trioxoandrosta-1(10),2-diene-4-oate hydrolase HsaD	16	12	31446.9	5619.8	-25827.1	-2.48	0.1577	1
Rv0547c	-	oxidoreductase	10	10	25261.7	14839.6	-10422.1	-0.77	0.1579	1
Rv1951c	-	hypothetical protein	5	3	4836.8	1965.4	-2871.4	-1.3	0.1579	1
Rv2991	-	hypothetical protein	6	5	29569.2	14508.1	-15061.1	-1.03	0.158	1
Rv2672	-	secreted protease	19	18	9590.3	6409.6	-3180.7	-0.58	0.1582	1
Rv3693	-	membrane protein	11	10	6281.4	10117.6	3836.2	0.69	0.1584	1
Rv2866	-	toxin RelG	5	5	6742.7	4513.4	-2229.3	-0.58	0.1585	1
Rv0695	-	creatinine amidohydrolase, mycofactocin system protein	12	9	2591.6	5598.7	3007.1	1.11	0.1591	1
Rv0023	-	transcriptional regulator	12	5	68.8	2.5	-66.3	-4.78	0.1592	1
Rv1839c	-	antitoxin VapB13	3	3	1203.8	2507.8	1304	1.06	0.1604	1
Rv1802	-	PPE family protein PPE30	22	21	41780.7	52627.9	10847.1	0.33	0.1609	1
Rv3291c	-	transcriptional regulator LrpA	12	7	3041.7	5113.2	2071.5	0.75	0.1614	1
Rv1421	-	nucleotide-binding protein	20	19	8590.9	12145.9	3555	0.5	0.1621	1
Rv2455c	-	oxidoreductase	37	12	13	6.4	-6.5	-1.01	0.1624	1
Rv1366	-	hypothetical protein	19	17	23079.6	16832.7	-6246.9	-0.46	0.1625	1
Rv2087	-	transposase	5	3	470.1	936.6	466.5	0.99	0.1638	1
Rv1910c	-	exported protein	13	13	32884.9	23181.7	-9703.2	-0.5	0.1639	1
Rv1780	-	hypothetical protein	14	14	12627.7	6359.9	-6267.8	-0.99	0.164	1
Rv2869c	-	metalloprotease RseP	21	19	687.2	1264.1	576.9	0.88	0.1643	1
Rv2555c	-	alanyl-tRNA synthetase AlaS	43	14	13.9	6.3	-7.6	-1.14	0.1646	1
Rv2934	-	phenolpthiocerol synthesis type-I polyketide synthase PpsD	68	31	215.8	512.7	296.9	1.25	0.1648	1
Rv1243c	-	PE-PGRS family protein PE_PGRS23	19	17	16102.4	21627.2	5524.8	0.43	0.165	1
Rv0421c	-	hypothetical protein	10	6	6217.5	2813.2	-3404.3	-1.14	0.1651	1
Rv1512	-	nucleotide-sugar epimerase EpiA	13	9	321.7	139.9	-181.7	-1.2	0.1657	1
Rv1440	-	preprotein translocase subunit SecG	6	1	502.1	285.8	-216.2	-0.81	0.1661	1
Rv1601	-	imidazole glycerol phosphate dehydratase HisB	15	5	4.9	1.3	-3.6	-1.9	0.1666	1
Rv2316	-	sugar-transport ABC transporter integral membrane protein UspA	14	8	20717.3	13260.6	-7456.7	-0.64	0.1669	1
Rv0561c	-	oxidoreductase	18	5	8.9	46	37.1	2.37	0.1671	1
Rv2178c	-	3-deoxy-7-phosphoheptulonate synthase AroG	16	5	5	1.3	-3.7	-1.94	0.1673	1
Rv0018c	-	phosphoserine/threonine phosphatase PstP	25	15	18253.4	8070	-10183.5	-1.18	0.1675	1
Rv2378c	-	lysine-N-oxygenase MbtG	10	6	314.7	1066	751.3	1.76	0.1682	1
Rv2478c	-	single-strand DNA-binding protein	5	5	10210.6	6981.6	-3229	-0.55	0.1684	1
Rv2913c	-	deacetylase	31	25	7450.2	10645.5	3195.2	0.51	0.1686	1
Rv2484c	-	diacylglycerol acyltransferase	22	21	13092.3	18274.7	5182.4	0.48	0.1689	1
Rv0353	-	heat shock protein transcriptional repressor HspR	6	5	4693.1	2610.9	-2082.2	-0.85	0.169	1
Rv2062c	-	cobalamin biosynthesis protein CobN	50	42	44843.1	34657.6	-10185.5	-0.37	0.169	1
Rv2140c	-	hypothetical protein	11	11	766.7	286.5	-480.2	-1.42	0.169	1
Rv3637	-	transposase	6	6	7229.3	4359.8	-2869.5	-0.73	0.1699	1
Rv0360c	-	hypothetical protein	9	9	13097.4	5511.9	-7585.5	-1.25	0.1701	1
Rv3021c	-	PPE family protein	27	11	8883.2	13161.4	4278.2	0.57	0.1704	1
Rv1261c	-	deazaflavin-dependent nitroreductase	11	11	4050	6003.9	1953.9	0.57	0.1709	1
Rv2461c	-	ATP-dependent Clp protease proteolytic subunit 1 ClpP1	10	3	18.9	3.5	-15.3	-2.41	0.171	1
Rv0592	-	MCE-family protein Mce2D	29	20	19953.4	11134.4	-8819.1	-0.84	0.1712	1
Rv0311	-	hypothetical protein	17	15	18006.9	11830.7	-6176.2	-0.61	0.1715	1
Rv2910c	-	hypothetical protein	10	7	17633.3	3768.8	-13864.6	-2.23	0.1717	1
Rv1245c	-	oxidoreductase	15	14	17290	25148.7	7858.7	0.54	0.1721	1
Rv2567	-	alanine and leucine rich protein	40	30	13451.6	9809.9	-3641.7	-0.46	0.1723	1
Rv2732c	-	transmembrane protein	6	5	4567.3	2236.8	-2330.5	-1.03	0.1723	1
Rv0127	-	maltokinase Mak	31	11	1321.5	3364	2042.5	1.35	0.173	1
Rv1052	-	hypothetical protein	7	7	3896.6	6648.7	2752	0.77	0.1733	1
Rv1998c	-	hypothetical protein	19	14	18284.1	11540.4	-6743.7	-0.66	0.1734	1
Rv0330c	-	hypothetical protein	9	8	10769.9	16904.7	6134.8	0.65	0.174	1
Rv1099c	-	fructose 1,6-bisphosphatase GlpX	13	10	3282.4	6026.4	2743.9	0.88	0.1743	1
Rv1236	-	sugar-transport ABC transporter integral membrane protein SugA	19	15	19531	31032.9	11501.9	0.67	0.1743	1
Rv2890c	-	30S ribosomal protein S2 RpsB	10	2	3	0	-3	0.02	0.175	1
Rv2898c	-	endonuclease	4	3	63	262	199	2.06	0.1755	1
Rv1546	-	hypothetical protein	6	5	14959.9	20738.6	5778.7	0.47	0.1756	1
Rv0381c	-	hypothetical protein	17	15	34047.3	20139.2	-13908.1	-0.76	0.1759	1
Rv3280	-	propionyl-CoA carboxylase beta chain 5 AccD5	32	8	7.9	3.9	-4	-1.01	0.1759	1
Rv1635c	-	polyprenol phosphomannose-dependent ManLAM-capping mannosyltransferase	32	31	78576.6	61281.2	-17295.4	-0.36	0.1769	1
Rv0748	-	antitoxin VapB31	3	3	8032.3	2896.6	-5135.7	-1.47	0.177	1
Rv3468c	-	dTDP-glucose 4,6-dehydratase	14	9	7567.6	4238	-3329.6	-0.84	0.1771	1
Rv0111	-	transmembrane acyltransferase	42	35	30220.2	39831.9	9611.8	0.4	0.1772	1
Rv0215c	-	acyl-CoA dehydrogenase FadE3	18	16	25582.3	16291.4	-9290.8	-0.65	0.1772	1
Rv3192	-	alanine and proline rich protein	4	4	318.2	897.8	579.6	1.5	0.1773	1
Rv2344c	-	deoxyguanosine triphosphate triphosphohydrolase Dgt	26	24	8960	5780.9	-3179.1	-0.63	0.1774	1
Rv2500c	-	acyl-CoA dehydrogenase FadE19	29	16	2863.4	4861.5	1998.1	0.76	0.1777	1
Rv1590	-	hypothetical protein	3	3	3546.5	5447.5	1901	0.62	0.1782	1
Rv3292	-	hypothetical protein	20	17	18455.2	26738.3	8283.1	0.53	0.1782	1
Rv1551	-	glycerol-3-phosphate O-acyltransferase PlsB1	33	27	42726.2	30899.6	-11826.6	-0.47	0.1786	1
Rv0098	-	fatty-acyl-CoA thioesterase type III FcoT	11	9	4544.8	2617.7	-1927.1	-0.8	0.1789	1
Rv1396c	-	PE-PGRS family protein PE_PGRS25	12	11	7831.9	5067.5	-2764.4	-0.63	0.1798	1
Rv1167c	-	transcriptional regulator	9	4	4226.7	1990.9	-2235.9	-1.09	0.1799	1
Rv0821c	-	phosphate-transport system transcriptional regulator PhoY2	6	5	13978.9	30485.5	16506.6	1.12	0.1805	1
Rv1063c	-	hypothetical protein	15	12	21154.5	14383.4	-6771.1	-0.56	0.1806	1
Rv1632c	-	hypothetical protein	12	12	25197.6	17938.6	-7259	-0.49	0.1806	1
Rv2808	-	hypothetical protein	10	8	1427.9	2784	1356.1	0.96	0.1815	1
Rv1033c	-	two-component system transcriptional regulator TrcR	15	14	14677.9	9725.1	-4952.8	-0.59	0.1817	1
Rv3706c	-	proline rich protein	10	9	15137.4	21582.3	6444.9	0.51	0.1817	1
Rv2976c	-	uracil DNA glycosylase Ung	8	7	8114	3877.5	-4236.4	-1.07	0.182	1
Rv1303	-	hypothetical protein	4	2	3	214.1	211.1	6.16	0.1824	1
Rv0501	-	UDP-glucose 4-epimerase GalE2	26	20	15112.1	9390.9	-5721.2	-0.69	0.1827	1
Rv0200	-	transmembrane protein	7	6	9088.3	3798.5	-5289.9	-1.26	0.1833	1
Rv0780	-	phosphoribosylaminoimidazole-succinocarboxamide synthase PurC	26	5	4	9.5	5.4	1.23	0.1833	1
Rv0787A	-	phosphoribosylformylglycinamidine synthase	2	2	3	0	-3	-0.01	0.1835	1
Rv3102c	-	cell division ATP-binding protein FtsE	9	5	168.7	380.1	211.4	1.17	0.1839	1
Rv2537c	-	3-dehydroquinate dehydratase AroD	7	2	55.3	191.5	136.2	1.79	0.184	1
Rv2105	-	transposase	6	6	1291.1	2968.4	1677.4	1.2	0.185	1
Rv2274A	-	antitoxin MazE8	4	4	5188.7	2220.6	-2968.1	-1.22	0.1851	1
Rv0076c	-	membrane protein	3	3	6478.8	4405.4	-2073.5	-0.56	0.1854	1
Rv0265c	-	iron complex transporter substrate-binding protein	9	9	15901.1	9328.5	-6572.6	-0.77	0.1854	1
Rv0531	-	membrane protein	4	4	14.7	199.6	184.9	3.76	0.1854	1
Rv2782c	-	zinc protease PepR	13	12	3849.7	2354.2	-1495.5	-0.71	0.1854	1
Rv1013	-	polyketide synthase Pks16	22	22	29977.9	22390.9	-7587	-0.42	0.1855	1
Rv0511	-	uroporphyrin-III C-methyltransferase HemD	19	10	10	5.1	-4.9	-0.97	0.1856	1
Rv2418c	-	hypothetical protein	21	6	4	113.4	109.4	4.84	0.1864	1
Rv3529c	-	hypothetical protein	26	18	10817.5	7267.6	-3549.8	-0.57	0.1864	1
Rv1334	-	hydrolase	12	12	53280.3	40034.3	-13246	-0.41	0.1866	1
Rv2267c	-	hypothetical protein	37	29	34731.9	25793.4	-8938.5	-0.43	0.1869	1
Rv3119	-	molybdenum cofactor biosynthesis protein E1 MoaE1	12	12	7443.6	10226.4	2782.8	0.46	0.1873	1
Rv1336	-	cysteine synthase B CysM	19	17	126476	99986.2	-26490	-0.34	0.1877	1
Rv3381c	-	transposase	4	2	110.6	260.4	149.8	1.24	0.1878	1
Rv3259	-	hypothetical protein	2	2	1485.5	863	-622.5	-0.78	0.1881	1
Rv0356c	-	hypothetical protein	9	7	7984	3866.7	-4117.4	-1.05	0.1883	1
Rv0596c	-	antitoxin VapB4	6	3	1086.9	217.4	-869.5	-2.32	0.1883	1
Rv1380	-	aspartate carbamoyltransferase PyrB	13	7	3.9	12.9	8.9	1.71	0.1883	1
Rv3719	-	hypothetical protein	37	32	40264.4	30674.2	-9590.2	-0.39	0.189	1
Rv0796	-	transposase	23	7	10.9	23.2	12.3	1.09	0.1894	1
Rv0742	-	PE-PGRS family protein PE_PGRS8	5	3	3673.1	2135.7	-1537.4	-0.78	0.1895	1
Rv1080c	-	transcription elongation factor GreA	9	4	1620.8	465.2	-1155.6	-1.8	0.1896	1
Rv1616	-	hypothetical protein	12	11	11459.3	16332.6	4873.3	0.51	0.1898	1
Rv2724c	-	acyl-CoA dehydrogenase FadE20	25	22	25383.5	18640.7	-6742.8	-0.45	0.1916	1
Rv3256c	-	hypothetical protein	10	8	1239.4	713.4	-526	-0.8	0.1919	1
Rv0567	-	methyltransferase	20	19	33041.8	22463.5	-10578.3	-0.56	0.1921	1
Rv1697	-	hypothetical protein	18	9	188.9	696.5	507.6	1.88	0.1921	1
Rv0378	-	glycine rich protein	3	3	2874.9	463.4	-2411.5	-2.63	0.1923	1
Rv0521	-	methyltransferase	5	4	8305.5	4924.7	-3380.8	-0.75	0.1928	1
Rv2379c	-	peptide synthetase MbtF	63	37	124.7	211.2	86.5	0.76	0.1928	1
Rv2642	-	transcriptional regulator ArsR-family	4	4	1591.2	2713.8	1122.5	0.77	0.193	1
Rv0234c	-	succinate-semialdehyde dehydrogenase [NADP] dependent GabD1	23	17	9042.2	6165.1	-2877.1	-0.55	0.1932	1
Rv1296	-	homoserine kinase ThrB	16	5	10	108.2	98.2	3.44	0.1932	1
Rv1320c	-	adenylate cyclase	29	27	28977.5	22041.5	-6936.1	-0.39	0.1934	1
Rv1693	-	hypothetical protein	1	1	2967	1161.4	-1805.6	-1.35	0.194	1
Rv1709	-	segregation and condensation protein ScpA	11	10	9198	14126.1	4928.1	0.62	0.1944	1
Rv3838c	-	prephenate dehydratase PheA	17	5	654.5	1475	820.4	1.17	0.1946	1
Rv3582c	-	4-diphosphocytidyl-2-C-methyl-D-erythritol synthase IspD	9	6	11.9	291.1	279.1	4.61	0.195	1
Rv2571c	-	transmembrane alanine and valine and leucine rich protein	10	8	8722.7	12971.9	4249.1	0.57	0.1952	1
Rv2832c	-	sn-glycerol-3-phosphate transport ABC transporter ATP-binding protein UgpC	10	6	1417	3456.8	2039.8	1.29	0.1956	1
Rv0896	-	citrate synthase I GltA2	29	11	31.8	357.7	326	3.49	0.1957	1
Rv2547	-	antitoxin VapB19	2	2	2740.8	4956.3	2215.5	0.85	0.1957	1
Rv1154c	-	hypothetical protein	16	15	17061.9	23368.8	6306.9	0.45	0.1961	1
Rv0357c	-	adenylosuccinate synthetase PurA	24	5	6	1.2	-4.8	-2.34	0.1968	1
Rv0770	-	dehydrogenase/reductase	10	8	8435	5083	-3352	-0.73	0.1971	1
Rv3221A	-	anti-sigma factor RshA	3	1	71	164.9	93.9	1.22	0.1973	1
Rv0657c	-	antitoxin VapB6	1	1	3020.9	651.7	-2369.2	-2.21	0.1982	1
Rv2471	-	alpha-glucosidase AglA	17	15	26278.3	18319.5	-7958.8	-0.52	0.1985	1
Rv2408	-	PE family protein PE24	18	17	35024	24224.8	-10799.2	-0.53	0.1987	1
Rv1434	-	hypothetical protein	1	1	2057.6	99	-1958.6	-4.38	0.1988	1
Rv2223c	-	exported protease	29	26	50967.9	39947.6	-11020.4	-0.35	0.1989	1
Rv0309	-	exported protein	12	10	6752.4	9652.7	2900.3	0.52	0.199	1
Rv3849	-	ESX-1 secretion-associated regulator EspR	8	7	913.2	2033.6	1120.4	1.15	0.1991	1
Rv0590A	-	ABC transporter substrate-binding protein	7	5	3095.1	4410.5	1315.4	0.51	0.1993	1
Rv2247	-	propionyl-CoA carboxylase beta chain 6 AccD6	14	8	4019.5	719.1	-3300.4	-2.48	0.1993	1
Rv0861c	-	DNA helicase Ercc3	27	25	10995.2	7235.3	-3759.9	-0.6	0.1998	1
Rv1567c	-	membrane protein	9	7	24441.4	34132.7	9691.4	0.48	0.1998	1
Rv0167	-	ABC transporter permease YrbE1A	7	7	6155.9	3234.7	-2921.2	-0.93	0.2	1
Rv0826	-	hypothetical protein	22	22	63290	51568.5	-11721.5	-0.3	0.2001	1
Rv2388c	-	oxygen-independent coproporphyrinogen III oxidase HemN	20	16	27670.2	19098	-8572.2	-0.53	0.2001	1
Rv1410c	-	MFS drug efflux transporter P55	30	24	21803.4	13653.7	-8149.7	-0.68	0.2015	1
Rv0532	-	PE-PGRS family protein PE_PGRS6	21	18	15408.4	10786.8	-4621.6	-0.51	0.2016	1
Rv3800c	-	polyketide synthase Pks13	57	17	10	18.3	8.3	0.87	0.2016	1
Rv1465	-	nitrogen fixation protein	8	5	6	67.9	61.9	3.51	0.2018	1
Rv3270	-	metal cation-transporter P-type ATPase CtpC	17	7	156.6	325.7	169.1	1.06	0.2025	1
Rv3139	-	acyl-CoA dehydrogenase FadE24	23	21	11965.4	5671.3	-6294.1	-1.08	0.2027	1
Rv3316	-	succinate dehydrogenase [cytochrome B-556 subunit] SdhC	1	1	8.8	44.5	35.7	2.34	0.2035	1
Rv2628	-	hypothetical protein	9	7	7872.1	4388.2	-3483.9	-0.84	0.2038	1
Rv0213c	-	methyltransferase	31	27	32239.8	23932.5	-8307.3	-0.43	0.204	1
Rv0763c	-	ferredoxin	2	1	276.1	473.2	197.1	0.78	0.2041	1
Rv0382c	-	orotate phosphoribosyltransferase PyrE	12	3	3	0	-3	0	0.2044	1
Rv2109c	-	proteasome alpha subunit PrcA	18	3	4	0	-4	-0.41	0.2047	1
Rv3216	-	hypothetical protein	6	6	10743.7	15652.1	4908.4	0.54	0.2048	1
Rv0820	-	phosphate-transport ABC transporter ATP-binding protein PhoT	13	13	335777	252776	-83000.8	-0.41	0.2052	1
Rv2307c	-	hypothetical protein	21	19	20712.6	26810.3	6097.8	0.37	0.2053	1
Rv2110c	-	proteasome beta subunit PrcB	18	3	3.9	0	-3.9	-0.4	0.2057	1
Rv2156c	-	phospho-N-acetylmuramoyl- pentappeptidetransferase MurX	12	3	1	3.7	2.7	1.91	0.2058	1
Rv1042c	-	transposase	6	6	1144.6	2332.5	1187.8	1.03	0.2062	1
Rv2089c	-	dipeptidase PepE	21	18	9149	6113.2	-3035.8	-0.58	0.2062	1
Rv3601c	-	aspartate 1-decarboxylase PanD	7	3	7	0	-7	-1.23	0.2063	1
Rv0998	-	hypothetical protein	13	3	3	0	-3	-0.01	0.2067	1
Rv1214c	-	PE family protein PE14	5	5	4447	2573.9	-1873.2	-0.79	0.2068	1
Rv2966c	-	methyltransferase	7	7	1089.5	265.4	-824.1	-2.04	0.2075	1
Rv3170	-	flavin-containing monoamine oxidase AofH	17	10	4505.7	10265.4	5759.7	1.19	0.2078	1
Rv3860	-	hypothetical protein	11	11	20851.9	13548.3	-7303.6	-0.62	0.208	1
Rv0074	-	hypothetical protein	19	17	23101.4	15883.5	-7218	-0.54	0.2082	1
Rv2369c	-	hypothetical protein	3	3	1927.5	4312	2384.4	1.16	0.2088	1
Rv1857	-	molybdenum-transport ABC transporter molybdate-binding lipoprotein ModA	6	6	9462.6	6979.7	-2482.9	-0.44	0.2089	1
Rv2158c	-	UDP-N-acetylmuramoylalanyl-D-glutamate-2, 6-diaminopimelate ligase MurE	12	5	45.3	425.1	379.7	3.23	0.209	1
Rv2166c	-	protein MraZ	8	3	1	3.8	2.8	1.91	0.21	1
Rv3857Ac	-	hypothetical protein	6	2	624.3	1522.6	898.3	1.29	0.2105	1
Rv0130	-	3-hydroxyl-thioester dehydratase	4	4	2791.6	4711.2	1919.7	0.76	0.2106	1
Rv2525c	-	tat pathway signal sequence	13	13	20053.9	27205.4	7151.5	0.44	0.2108	1
Rv3081	-	hypothetical protein	18	14	11240.5	7783.9	-3456.7	-0.53	0.2108	1
Rv1507c	-	hypothetical protein	29	8	8359	4631	-3728	-0.85	0.2111	1
Rv2469c	-	hypothetical protein	10	10	18403.3	12315.9	-6087.4	-0.58	0.2114	1
Rv2319c	-	universal stress protein	17	16	13141	20576.1	7435	0.65	0.2116	1
Rv1087A	-	short-chain Z-isoprenyl diphosphate synthase	8	7	6632.4	9964.9	3332.5	0.59	0.2122	1
Rv2363	-	amidase AmiA2	18	13	1660.8	2648.8	988	0.67	0.2122	1
Rv2807	-	hypothetical protein	12	11	17979.3	10261.9	-7717.4	-0.81	0.2123	1
Rv2838c	-	ribosome-binding factor a RbfA	8	4	24.1	229.9	205.8	3.26	0.2126	1
Rv0818	-	transcriptional regulator	11	11	18924.4	30333	11408.6	0.68	0.2128	1
Rv2789c	-	acyl-CoA dehydrogenase FadE21	16	11	6624.9	10622	3997.1	0.68	0.213	1
Rv3387	-	transposase	6	5	5577.7	10292.5	4714.8	0.88	0.2134	1
Rv0390	-	hypothetical protein	8	7	11003.1	8030.2	-2972.9	-0.45	0.2136	1
Rv2095c	-	proteasome accessory factor C PafC	15	14	19514	13121.1	-6392.9	-0.57	0.2139	1
Rv0587	-	ABC transporter permease YrbE2A	13	11	11523.2	6751.9	-4771.4	-0.77	0.2152	1
Rv1078	-	proline rich antigen Pra	18	4	30.9	120.1	89.2	1.96	0.2154	1
Rv2882c	-	ribosome recycling factor Frr	16	4	1	3.7	2.7	1.86	0.2169	1
Rv0423c	-	thiamine biosynthesis protein ThiC	22	5	67.3	337.7	270.4	2.33	0.2171	1
Rv2091c	-	membrane protein	19	18	3515.6	2290.4	-1225.2	-0.62	0.2172	1
Rv2310	-	excisionase	3	2	2782.4	1550.9	-1231.4	-0.84	0.2175	1
Rv1819c	-	drug-transport transmembrane ABC transporter ATP-binding protein BacA	33	30	51368.2	38581.4	-12786.8	-0.41	0.2176	1
Rv2810c	-	transposase	13	9	17504.1	8190.2	-9313.9	-1.1	0.2178	1
Rv3087	-	diacylglycerol acyltransferase	14	14	10455.4	14321.8	3866.4	0.45	0.2179	1
Rv3135	-	PPE family protein PPE50	10	7	5000.5	3146.4	-1854.1	-0.67	0.2187	1
Rv1458c	-	antibiotic transporter ATP-binding protein	14	5	8.1	1.6	-6.5	-2.36	0.2188	1
Rv1515c	-	hypothetical protein	18	12	6514.6	8672.3	2157.7	0.41	0.2195	1
Rv2210c	-	branched-chain-amino-acid aminotransferase IlvE	22	4	1	3.7	2.7	1.86	0.2195	1
Rv1871c	-	deazaflavin-dependent nitroreductase	10	9	20693.5	11398.7	-9294.9	-0.86	0.2197	1
Rv0129c	-	6-O-acylglucoside esterase/glucoside 6-O-acyltransferase FbpC	27	22	3589.4	5214.7	1625.2	0.54	0.22	1
Rv2605c	-	acyl-CoA thioesterase II TesB2	9	9	3547.6	5270.1	1722.6	0.57	0.2202	1
Rv3895c	-	ESX-2 secretion system protein EccB2	16	15	14416.5	18880.6	4464.1	0.39	0.2206	1
Rv2997	-	oxidoreductase	17	11	6878	11358.6	4480.6	0.72	0.2212	1
Rv1135A	-	acetyl-CoA acetyltransferase	6	5	6034.3	3330.7	-2703.6	-0.86	0.2213	1
Rv0186	-	beta-glucosidase BglS	34	28	20361.6	26635.7	6274.1	0.39	0.2214	1
Rv0701	-	50S ribosomal protein L3 RplC	16	4	1	3.8	2.8	1.91	0.2216	1
Rv3391	-	multifunctional enzyme with acyl-CoA-reductase activity AcrA1	35	26	27918.7	35230.9	7312.2	0.34	0.2216	1
Rv3684	-	cysteine synthase A	16	14	18945.7	12399.4	-6546.3	-0.61	0.2217	1
Rv3222c	-	hypothetical protein	7	4	6.1	1.2	-4.9	-2.36	0.2228	1
Rv0918	-	hypothetical protein	8	7	5444.6	3296.3	-2148.3	-0.72	0.2235	1
Rv3015c	-	5-methyltetrahydropteroyltriglutamate- homocysteine methyltransferase	9	7	2950.6	5447.4	2496.8	0.88	0.2242	1
Rv2563	-	glutamine-transport ABC transporter transmembrane protein	10	3	7	25.9	18.9	1.89	0.2244	1
Rv3449	-	membrane-anchored mycosin MycP4	18	16	12364	17337.6	4973.6	0.49	0.2245	1
Rv3634c	-	UDP-glucose 4-epimerase GalE1	21	7	18.7	218	199.3	3.54	0.225	1
Rv1792A	-	ESAT-6-like protein EsxM	2	2	2499.1	1337.1	-1162.1	-0.9	0.2256	1
Rv1710	-	segregation and condensation protein ScpB	15	12	6604.8	8880.4	2275.6	0.43	0.2257	1
Rv3024c	-	tRNA (5-methylaminomethyl-2-thiouridylate)-methyltransferase TrmU	13	11	575.6	3370.1	2794.5	2.55	0.2258	1
Rv2877c	-	integral membrane protein	20	17	46077.8	28090.6	-17987.2	-0.71	0.2259	1
Rv1988	-	23S rRNA methyltransferase Erm	7	6	4471.1	7240.6	2769.5	0.7	0.226	1
Rv1911c	-	lipoprotein LppC	9	9	18147.3	11794.3	-6353	-0.62	0.2265	1
Rv3916c	-	hypothetical protein	14	12	1644	2772.1	1128.1	0.75	0.2266	1
Rv3038c	-	methyltransferase	14	7	271	767.4	496.3	1.5	0.227	1
Rv2576c	-	membrane protein	11	10	10819.3	15895	5075.8	0.55	0.2275	1
Rv3609c	-	GTP cyclohydrolase I FolE	14	5	936.2	2880.4	1944.2	1.62	0.2279	1
Rv2859c	-	glutamine amidotransferase	18	16	12110.3	15915.1	3804.8	0.39	0.2281	1
Rv2060	-	zinc/manganese transporter permease	5	5	396.9	1450.2	1053.3	1.87	0.2315	1
Rv0734	-	methionine aminopeptidase MapA	10	9	6023.2	2806	-3217.2	-1.1	0.2319	1
Rv0277c	-	toxin VapC25	6	5	7440.1	4384.3	-3055.8	-0.76	0.232	1
Rv3171c	-	non-heme haloperoxidase Hpx	14	13	9354.8	13907.7	4552.9	0.57	0.232	1	*
Rv3322c	-	methyltransferase	6	3	4116.4	1434.2	-2682.2	-1.52	0.232	1
Rv2296	-	haloalkane dehalogenase	17	14	48344	38595.9	-9748.1	-0.32	0.2326	1
Rv1111c	-	hypothetical protein	24	18	15850.3	22231.6	6381.3	0.49	0.2327	1
Rv2619c	-	hypothetical protein	2	2	3848.5	2068.7	-1779.8	-0.9	0.2333	1
Rv3201c	-	DNA helicase II/ATP-dependent DNA helicase PcrA	48	43	27182	20944.2	-6237.8	-0.38	0.2338	1
Rv1132	-	hypothetical protein	27	20	22666	17194.8	-5471.2	-0.4	0.2346	1
Rv2236c	-	cobalamin biosynthesis transmembrane protein CobD	12	9	12992.5	5486.7	-7505.8	-1.24	0.2349	1
Rv2784c	-	lipoprotein LppU	6	6	5478.5	2437.6	-3040.9	-1.17	0.2353	1
Rv3772	-	histidinol-phosphate aminotransferase HisC2	18	14	6981.2	9692.3	2711	0.47	0.2362	1
Rv1455	-	hypothetical protein	13	10	30974.1	15603.4	-15370.6	-0.99	0.2364	1
Rv2400c	-	sulfate-binding lipoprotein SubI	19	7	5.9	2.4	-3.6	-1.33	0.2369	1
Rv1237	-	sugar-transport ABC transporter integral membrane protein SugB	13	11	11849.8	18661.3	6811.5	0.66	0.2371	1
Rv3724B	-	cutinase Cut5b	14	11	9728.4	13111.5	3383.1	0.43	0.2372	1
Rv3036c	-	secreted protein	17	15	51192.6	37670.8	-13521.8	-0.44	0.2375	1
Rv1423	-	transcriptional regulator WhiA	12	9	62.5	1244.7	1182.2	4.32	0.2382	1
Rv1958c	-	hypothetical protein	11	8	25703.9	13921.9	-11782.1	-0.88	0.2388	1
Rv3507	-	PE-PGRS family protein PE_PGRS53	45	32	23023.9	16699.1	-6324.8	-0.46	0.2388	1
Rv2271	-	hypothetical protein	6	6	10150.9	5688.7	-4462.2	-0.84	0.2389	1
Rv2984	-	polyphosphate kinase PPK	32	7	6	2.4	-3.6	-1.33	0.2392	1
Rv0634c	-	hydroxyacylglutathione hydrolase	13	11	3690.4	4918.2	1227.8	0.41	0.2393	1
Rv1259	-	uracil DNA glycosylase UdgB	13	8	6148	3356	-2792.1	-0.87	0.2395	1
Rv0240	-	toxin VapC24	9	9	4396.4	7460.7	3064.3	0.76	0.2397	1
Rv1166	-	lipoprotein LpqW	24	12	16.9	384	367.1	4.51	0.2399	1
Rv1941	-	oxidoreductase	4	3	2664.2	6158.4	3494.2	1.21	0.2399	1
Rv3862c	-	transcriptional regulator WhiB-like WhiB6	14	9	17257.9	11295.5	-5962.3	-0.61	0.24	1
Rv1599	-	histidinol dehydrogenase HisD	16	8	8.9	4.7	-4.2	-0.91	0.2402	1
Rv1135c	-	PPE family protein PPE16	25	21	17560.8	23060	5499.2	0.39	0.2406	1
Rv0410c	-	serine/threonine-protein kinase PknG	31	13	10	5.4	-4.6	-0.89	0.2407	1
Rv3209	-	threonine and proline rich protein	9	9	16269.6	11693.5	-4576.1	-0.48	0.2408	1
Rv0760c	-	steroid delta-isomerase	6	5	2922.8	4382.1	1459.3	0.58	0.2411	1
Rv0762c	-	hypothetical protein	13	11	15579.7	9792.4	-5787.3	-0.67	0.2412	1
Rv3168	-	aminoglycoside phosphotransferase	19	11	2165.9	3651.2	1485.3	0.75	0.2413	1
Rv1399c	-	lipase LipH	16	12	6621.4	9835.2	3213.7	0.57	0.2414	1
Rv0623	-	antitoxin VapB30	3	2	5599.9	2377.5	-3222.3	-1.24	0.2418	1
Rv3704c	-	cysteine ligase GshA	17	16	18576.2	27625.6	9049.4	0.57	0.2418	1
Rv0282	-	ESX-3 secretion system protein EccA3	24	9	191.3	2702.8	2511.6	3.82	0.2426	1
Rv0235c	-	transmembrane protein	27	21	12862.8	16649.3	3786.5	0.37	0.243	1
Rv1615	-	membrane protein	10	8	9338.6	14553.1	5214.4	0.64	0.2435	1
Rv0346c	-	l-asparagine permease AnsP2	29	23	50615.4	63862.4	13247	0.34	0.2446	1
Rv0812	-	amino acid aminotransferase	17	12	129	1080.5	951.5	3.07	0.2453	1
Rv2096c	-	proteasome accessory factor B PafB	15	14	7652.1	4990.1	-2662	-0.62	0.2455	1
Rv1092c	-	pantothenate kinase CoaA	19	7	3	6.3	3.3	1.08	0.2456	1
Rv2189c	-	hypothetical protein	11	7	11055.8	6546.1	-4509.7	-0.76	0.2458	1
Rv2452c	-	hypothetical protein	8	6	4461.3	2231.3	-2230	-1	0.2459	1
Rv1110	-	LYTB2 protein	14	8	5.9	2.5	-3.4	-1.25	0.246	1
Rv1845c	-	ensor-transducer protein BlaR	15	11	322.6	23.2	-299.4	-3.8	0.2461	1
Rv3564	-	acyl-CoA dehydrogenase FadE33	8	6	3242	1473.7	-1768.3	-1.14	0.2462	1
Rv2622	-	methyltransferase	8	7	16408.6	7936.2	-8472.4	-1.05	0.2465	1
Rv3412	-	hypothetical protein	8	8	979.1	1389.3	410.2	0.5	0.2471	1
Rv1620c	-	thiol reductant ABC exporter subunit CydC	19	11	661.6	175.5	-486.1	-1.91	0.2472	1
Rv0322	-	UDP-glucose 6-dehydrogenase UdgA	24	16	10120.7	6200.2	-3920.6	-0.71	0.2475	1
Rv2820c	-	CRISPR type III-a/mtube-associated ramp protein csm4	20	18	26486.3	14866.6	-11619.7	-0.83	0.2477	1
Rv0535	-	5'-methylthioadenosine phosphorylase Pnp	9	8	12962.5	7332.3	-5630.2	-0.82	0.2485	1
Rv3188	-	hypothetical protein	7	5	7172.3	4693.8	-2478.4	-0.61	0.2492	1
Rv0731c	-	s-adenosylmethionine-dependent methyltransferase	10	9	10301.2	14943.6	4642.3	0.54	0.2502	1
Rv2294	-	cystathionine beta-lyase	22	20	31843	38665.1	6822.1	0.28	0.2509	1
Rv0881	-	methyltransferase	15	14	12573.5	9071.2	-3502.3	-0.47	0.2515	1
Rv3586	-	DNA integrity scanning protein disA	16	13	7846.2	4307.1	-3539.1	-0.87	0.2518	1
Rv0893c	-	s-adenosylmethionine-dependent methyltransferase	24	14	4771.5	2732.3	-2039.1	-0.8	0.2519	1
Rv2718c	-	transcriptional regulator NrdR	8	8	5107.2	7751.5	2644.4	0.6	0.2521	1
Rv1676	-	hypothetical protein	10	5	3251.1	4961.8	1710.7	0.61	0.2528	1
Rv3124	-	transcriptional regulator MoaR1	30	18	16481.1	11138	-5343.1	-0.57	0.2529	1
Rv2181	-	alpha-1,2-mannosyltransferase	21	19	64815.6	47896.6	-16919	-0.44	0.253	1
Rv1668c	-	ABC macrolide transporter ATP-binding protein	14	13	8361.4	5544.3	-2817.1	-0.59	0.2531	1
Rv1514c	-	hypothetical protein	18	14	13568	7401.4	-6166.6	-0.87	0.2533	1
Rv1834	-	hydrolase	13	11	16833.6	12521	-4312.6	-0.43	0.2537	1
Rv3483c	-	exported protein	14	13	24750.5	31398.5	6648.1	0.34	0.254	1
Rv1731	-	succinate-semialdehyde dehydrogenase GabD2	25	19	15266.9	11841.1	-3425.8	-0.37	0.2542	1
Rv0384c	-	endopeptidase ATP binding protein chain B ClpB	25	12	11	5.9	-5.1	-0.9	0.2543	1
Rv2641	-	cadmium-induced protein CadI	9	7	12810.8	17752.2	4941.4	0.47	0.2547	1
Rv1161	-	respiratory nitrate reductase alpha chain NarG	75	67	50104.5	59840	9735.5	0.26	0.2551	1
Rv1554	-	fumarate reductase FrdC	10	9	7836.1	9780.8	1944.7	0.32	0.256	1
Rv0280	-	PPE family protein PPE3	26	24	23458.9	29744.7	6285.8	0.34	0.2561	1
Rv2276	-	cytochrome P450 121 Cyp121	18	12	6053.2	3826.7	-2226.5	-0.66	0.2561	1
Rv3802c	-	membrane protein	26	7	2762.1	1509.2	-1253	-0.87	0.2561	1
Rv3848	-	transmembrane protein	7	5	39.7	134.1	94.4	1.76	0.2562	1
Rv1813c	-	hypothetical protein	9	9	5314.3	7066.2	1751.9	0.41	0.2565	1
Rv0372c	-	xanthine dehydrogenase accessory factor	6	6	767.3	2265.4	1498.1	1.56	0.258	1
Rv1683	-	bifunctional enzyme long-chain acyl-CoA synthase and lipase	41	27	37534.6	27420.3	-10114.3	-0.45	0.2584	1
Rv1879	-	hypothetical protein	20	17	13502.9	17237.5	3734.6	0.35	0.2584	1
Rv2746c	-	PGP synthase PgsA3	14	2	8	2.8	-5.2	-1.53	0.2587	1
Rv2623	-	universal stress protein	9	9	1955.1	3162.6	1207.5	0.69	0.2594	1
Rv1994c	-	ArsR family transcriptional regulator CmtR	7	4	1977.2	3248.8	1271.6	0.72	0.2597	1
Rv3037c	-	SAM-dependent 3-O-methyltransferase	15	12	22975.9	17122.6	-5853.3	-0.42	0.2597	1
Rv2534c	-	elongation factor P Efp	11	4	5	1.3	-3.7	-1.93	0.2598	1
Rv1717	-	hypothetical protein	4	4	2924.9	4156.9	1231.9	0.51	0.2602	1
Rv3508	-	PE-PGRS family protein PE_PGRS54	41	29	21487.1	15607.6	-5879.4	-0.46	0.2608	1
Rv3516	-	enoyl-CoA hydratase EchA19	9	8	4966.3	3407.6	-1558.7	-0.54	0.2617	1
Rv1067c	-	PE-PGRS family protein PE_PGRS19	15	10	9392.1	5226	-4166.1	-0.85	0.2624	1
Rv2931	-	phenolpthiocerol synthesis type-I polyketide synthase PpsA	81	24	20.9	41.4	20.5	0.99	0.2625	1
Rv1742	-	hypothetical protein	14	13	12414.9	15992.4	3577.5	0.37	0.2629	1
Rv1773c	-	transcriptional regulator	11	8	4019.5	6240.3	2220.8	0.63	0.2641	1
Rv0864	-	molybdenum cofactor biosynthesis protein C2 MoaC2	11	8	12560.4	8434.9	-4125.5	-0.57	0.2645	1
Rv3521	-	hypothetical protein	15	13	30649	25012.7	-5636.3	-0.29	0.2647	1
Rv2575	-	glycine rich membrane protein	20	18	18740.3	12884.5	-5855.8	-0.54	0.2648	1
Rv2693c	-	integral membrane protein	12	11	15078.7	10298.2	-4780.5	-0.55	0.265	1
Rv1805c	-	hypothetical protein	6	3	225.1	555.4	330.3	1.3	0.2654	1
Rv3320c	-	toxin VapC44	6	2	479	256.2	-222.7	-0.9	0.2663	1
Rv1686c	-	ABC transporter efflux protein DrrB	13	9	3475	5942.9	2467.9	0.77	0.2668	1
Rv2476c	-	NAD-dependent glutamate dehydrogenase Gdh	64	56	18349.1	14772.3	-3576.8	-0.31	0.2671	1
Rv2064	-	precorrin-3B synthase CobK	10	8	4170.8	6497.1	2326.3	0.64	0.268	1
Rv0929	-	phosphate-transport ABC transporter integral membrane protein PstC2	17	12	128794	93221.3	-35572.5	-0.47	0.2682	1
Rv0905	-	enoyl-CoA hydratase EchA6	10	7	5048.7	8111.8	3063.1	0.68	0.2684	1
Rv0672	-	acyl-CoA dehydrogenase FadE8	27	23	15811.2	20569.6	4758.4	0.38	0.2686	1
Rv2543	-	lipoprotein LppA	14	9	7977	11471.5	3494.5	0.52	0.2686	1
Rv1502	-	hypothetical protein	33	13	3549	1579.5	-1969.5	-1.17	0.2689	1
Rv0757	-	OmpR family two-component system response regulator	12	5	4.9	1.2	-3.7	-2.05	0.2692	1
Rv3227	-	3-phosphoshikimate 1-carboxyvinyltransferase AroA	8	4	5.9	1.3	-4.5	-2.16	0.2695	1
Rv0085	-	hydrogenase HycP	4	4	1962.7	877.4	-1085.4	-1.16	0.2697	1
Rv2769c	-	PE family protein PE27	16	15	28868.1	21774.5	-7093.6	-0.41	0.27	1
Rv2940c	-	mycocerosic acid synthase membrane-associated Mas	82	38	32	50.2	18.2	0.65	0.2701	1
Rv3200c	-	NAD+ diphosphatase	17	17	4188	2792.7	-1395.3	-0.58	0.2701	1
Rv3075c	-	citrate lyase subunit beta	17	13	11084.4	15501.4	4417	0.48	0.2704	1
Rv3262	-	F420 biosynthesis protein FbiB	13	7	21	11.8	-9.2	-0.83	0.2706	1
Rv0691A	-	mycofactocin protein	4	3	1102.3	2359.7	1257.4	1.1	0.271	1
Rv1931c	-	transcriptional regulator	5	4	1442.5	873.9	-568.6	-0.72	0.2717	1
Rv3448	-	ESX-4 secretion system protein EccD4	28	22	12328.1	18692.7	6364.6	0.6	0.2717	1
Rv3159c	-	PPE family protein PPE53	27	20	18526.3	25206.6	6680.2	0.44	0.2725	1
Rv2266	-	cytochrome P450 124 Cyp124	17	17	37109.9	22094.1	-15015.9	-0.75	0.2732	1
Rv2365c	-	cytidine deaminase	2	2	854	1637.4	783.4	0.94	0.2733	1
Rv3766	-	hypothetical protein	16	15	6076.8	7976	1899.2	0.39	0.2735	1
Rv2070c	-	precorrin-6A reductase CobK	16	10	6774.3	8910.7	2136.4	0.4	0.2737	1
Rv0967	-	copper-sensing transcriptional repressor CsoR	1	1	603.8	1344.8	741	1.16	0.2743	1
Rv1793	-	ESAT-6 like protein EsxN	6	6	2193	1202.1	-990.9	-0.87	0.2746	1
Rv2144c	-	transmembrane protein	4	3	3801.5	7353.8	3552.2	0.95	0.2747	1
Rv3155	-	NADH dehydrogenase subunit K NuoK	6	3	1650.3	3812.2	2161.9	1.21	0.2749	1
Rv2186c	-	hypothetical protein	8	4	731.6	83.7	-647.9	-3.13	0.2751	1
Rv0162c	-	zinc-type alcohol dehydrogenase AdhE1	17	15	11723.4	15228.5	3505.1	0.38	0.2755	1
Rv3248c	-	adenosylhomocysteinase SahH	23	5	4.9	1.2	-3.7	-2.06	0.2762	1
Rv1041c	-	transposase	18	17	6534.8	8364.9	1830.1	0.36	0.2765	1
Rv3101c	-	cell division protein FtsX	19	12	1671.1	792.4	-878.7	-1.08	0.2769	1
Rv3107c	-	alkyldihydroxyacetonephosphate synthase AgpS	22	19	13910.7	17800.1	3889.4	0.36	0.2769	1
Rv0460	-	hydrophobic protein	3	3	763	1229	466	0.69	0.2775	1
Rv0038	-	transcriptional regulator	7	7	2912.2	1776	-1136.2	-0.71	0.2781	1
Rv1859	-	molybdenum-transport ABC transporter ATP-binding protein ModC	16	13	20485.6	15414.7	-5070.9	-0.41	0.2785	1
Rv0565c	-	monooxygenase	36	34	36372.6	44447	8074.3	0.29	0.2798	1
Rv0308	-	integral membrane protein	15	13	6054.5	8196	2141.5	0.44	0.28	1
Rv1315	-	UDP-N-acetylglucosamine 1-carboxyvinyltransferase MurA	17	6	9	4.3	-4.7	-1.05	0.2802	1
Rv0195	-	two-component system transcriptional regulator, LuxR-family	6	6	5507.7	7858.9	2351.2	0.51	0.2811	1
Rv1662	-	polyketide synthase Pks8	67	43	23441.3	18157.9	-5283.4	-0.37	0.2812	1
Rv0725c	-	hypothetical protein	15	11	8208	5043.1	-3164.9	-0.7	0.2817	1
Rv3562	-	acyl-CoA dehydrogenase FadE31	10	8	3766.9	2323.3	-1443.6	-0.7	0.282	1
Rv0420c	-	transmembrane protein	9	8	7429.1	4511.5	-2917.6	-0.72	0.2822	1
Rv1405c	-	methyltransferase	12	11	37224.7	28028	-9196.6	-0.41	0.2823	1
Rv3424c	-	hypothetical protein	11	8	1933.5	2980.4	1046.9	0.62	0.2824	1
Rv2195	-	Rieske iron-sulfur protein QcrA	22	3	14.2	81.9	67.7	2.53	0.2829	1
Rv3823c	-	membrane transporter MmpL8	83	56	252250	212742	-39508.3	-0.25	0.2829	1
Rv2438c	-	glutamine-dependent NAD(+) synthetase NadE	39	7	20	10.2	-9.8	-0.97	0.2836	1
Rv1680	-	hypothetical protein	16	10	10147.6	6191.4	-3956.3	-0.71	0.2837	1
Rv1284	-	beta-carbonic anhydrase	7	5	7637	4409.7	-3227.3	-0.79	0.2839	1
Rv0907	-	beta-lactamase	43	35	21160.6	16995.1	-4165.5	-0.32	0.2843	1
Rv1692	-	HAD hydrolase, family IIA	12	10	4612.2	2667.8	-1944.4	-0.79	0.2846	1
Rv1767	-	alkylhydroperoxidase AhpD family core domain-containing protein	8	7	12164.2	6854.6	-5309.6	-0.83	0.2849	1	*
Rv2788	-	DtxR family Mn-dependent transcriptional regulator	7	7	897.8	1499.8	602	0.74	0.2849	1
Rv0088	-	polyketide cyclase/dehydrase	14	10	8088.6	4637.8	-3450.8	-0.8	0.2857	1
Rv0919	-	N-acetyltransferase	10	9	19871.1	14966.3	-4904.7	-0.41	0.2863	1
Rv2413c	-	DNA polymerase III delta subunit	14	6	122.5	545.3	422.9	2.15	0.2867	1
Rv1663	-	polyketide synthase Pks17	19	15	17914.1	10859.2	-7054.9	-0.72	0.2869	1
Rv1638A	-	hypothetical protein	5	2	2053	654.8	-1398.2	-1.65	0.2874	1
Rv3305c	-	N-acyl-L-amino acid amidohydrolase AmiA1	19	13	6578.1	9509.9	2931.8	0.53	0.2875	1
Rv1884c	-	resuscitation-promoting factor RpfC	6	5	8220.6	4202.9	-4017.7	-0.97	0.2882	1
Rv2507	-	proline rich membrane protein	20	7	364.4	1086.9	722.5	1.58	0.2884	1
Rv2800	-	hydrolase	20	17	22661.6	15104.2	-7557.4	-0.59	0.2889	1
Rv0300	-	antitoxin VapB2	5	5	11134.2	15223.7	4089.5	0.45	0.2895	1
Rv0218	-	transmembrane protein	19	17	15792.1	20247.1	4454.9	0.36	0.2896	1
Rv1716	-	arylformamidase	12	11	7155.4	9277.7	2122.3	0.37	0.2897	1
Rv3687c	-	anti-anti-sigma factor RsfB	5	3	1805	2770.2	965.2	0.62	0.2897	1
Rv0184	-	hypothetical protein	11	9	12622.5	7349.6	-5272.9	-0.78	0.2901	1
Rv3362c	-	ATP/GTP-binding protein	6	5	11610.5	7712.6	-3897.9	-0.59	0.2903	1
Rv0097	-	oxidoreductase	26	21	20621.8	27407.9	6786.1	0.41	0.2907	1
Rv2981c	-	d-alanine ligase DdlA	14	3	3.9	1.3	-2.6	-1.59	0.2907	1
Rv1701	-	tyrosine recombinase xerD	15	9	2839.1	1189.6	-1649.5	-1.25	0.2909	1
Rv2263	-	oxidoreductase	13	11	37653.5	28658.1	-8995.3	-0.39	0.2914	1
Rv1974	-	membrane protein	9	9	10859.5	14490.5	3631	0.42	0.2918	1
Rv0661c	-	toxin VapC7	5	5	5620.7	9302.9	3682.2	0.73	0.2922	1
Rv3285	-	acetyl-/propionyl-coenzyme A carboxylase AccA3	26	5	3.9	1.6	-2.4	-1.33	0.2929	1
Rv2190Ac	-	hypothetical protein	3	3	3795.7	2043	-1752.7	-0.89	0.2935	1
Rv3691	-	hypothetical protein	16	11	6137.4	8886	2748.6	0.53	0.2936	1
Rv1969	-	MCE-family protein Mce3D	13	12	10293.8	15375.3	5081.5	0.58	0.2938	1
Rv3250c	-	rubredoxin RubB	3	3	1025.7	2561.2	1535.5	1.32	0.2939	1
Rv2798c	-	hypothetical protein	3	3	742.8	1458.7	715.9	0.97	0.2947	1
Rv3018c	-	PPE family protein PPE46	28	14	14610.6	20398.1	5787.5	0.48	0.2949	1
Rv0828c	-	deaminase	10	10	27710.6	21421	-6289.7	-0.37	0.2951	1
Rv3790	-	decaprenylphosphoryl-beta-D-ribose 2'-oxidase	26	5	2047.9	395.2	-1652.7	-2.37	0.2953	1
Rv1708	-	chromosome partitioning protein	19	7	187.2	7	-180.2	-4.75	0.2956	1
Rv1144Ac	-	hypothetical protein	4	4	1192	1829.4	637.4	0.62	0.2962	1
Rv1169c	-	PE family protein lipase LipX	3	2	3557.3	5353.9	1796.6	0.59	0.2966	1
Rv2558	-	hypothetical protein	7	7	11583.9	15586	4002.1	0.43	0.2966	1
Rv1326c	-	1,4-alpha-glucan-branching enzyme GlgB	42	12	11	6.7	-4.3	-0.71	0.2967	1
Rv0198c	-	zinc metalloprotease Zmp1	42	35	24448.9	19631.7	-4817.1	-0.32	0.2968	1
Rv2551c	-	leader peptidase (prepilin peptidase)/N-methyltransferase	2	1	1042.3	2308.9	1266.6	1.15	0.2968	1
Rv1178	-	succinyldiaminopimelate transaminase	21	17	1676.9	2337.7	660.8	0.48	0.297	1
Rv3076	-	hypothetical protein	5	5	1079.6	2149.5	1070	0.99	0.297	1
Rv2787	-	alanine rich protein	26	21	21195.9	27477.3	6281.3	0.37	0.2973	1
Rv2904c	-	50S ribosomal protein L19 RplS	4	4	145.1	26.9	-118.2	-2.43	0.2973	1
Rv3339c	-	isocitrate dehydrogenase Icd1	31	26	26440.6	32424.9	5984.3	0.29	0.2975	1
Rv0662c	-	antitoxin VapB7	1	1	858	1452.5	594.6	0.76	0.2978	1
Rv1377c	-	transferase	13	11	5957.6	8593.2	2635.6	0.53	0.2982	1
Rv1893	-	hypothetical protein	1	1	298.4	692.7	394.3	1.21	0.2984	1
Rv1799	-	lipoprotein LppT	2	1	478.9	1330.6	851.6	1.47	0.2986	1
Rv2922A	-	acylphosphatase AcyP	1	1	78.7	167.8	89.1	1.09	0.2986	1
Rv0510	-	porphobilinogen deaminase HemC	13	5	3.9	1.3	-2.6	-1.59	0.299	1
Rv3550	-	enoyl-CoA hydratase EchA20	7	5	6212.6	3298.1	-2914.5	-0.91	0.299	1
Rv0624	-	toxin VapC30	7	7	6663.2	4124.4	-2538.8	-0.69	0.2991	1
Rv0067c	-	transcriptional regulator TetR-family	12	11	4664.9	3121.7	-1543.2	-0.58	0.2992	1
Rv2826c	-	hypothetical protein	11	10	10437.4	13452	3014.6	0.37	0.2993	1
Rv1745c	-	isopentenyl-diphosphate delta-isomerase Idi	13	10	3567.3	2180	-1387.4	-0.71	0.3001	1
Rv3729	-	transferase	28	21	39762.2	30794.9	-8967.3	-0.37	0.3002	1
Rv3378c	-	diterpene synthase	43	14	7827.1	5408.6	-2418.6	-0.53	0.3005	1
Rv2696c	-	alanine and glycine and valine rich protein	10	9	7779.2	13607.7	5828.5	0.81	0.3008	1
Rv0175	-	MCE-associated membrane protein	9	7	8758	4943.1	-3815	-0.83	0.3012	1
Rv0659c	-	toxin MazF2	4	4	3435	5569.7	2134.7	0.7	0.3012	1
Rv2648	-	transposase	6	6	1796.2	2809.7	1013.5	0.65	0.3012	1
Rv2322c	-	ornithine aminotransferase RocD1	11	7	3030.4	4510.9	1480.5	0.57	0.3013	1
Rv0603	-	exported protein	2	1	1528.5	940.5	-588	-0.7	0.3016	1
Rv3677c	-	hydrolase	11	10	1291.7	2466.6	1174.9	0.93	0.3019	1
Rv3730c	-	DNA ligase LigD	21	20	22705.8	17173.1	-5532.7	-0.4	0.3019	1
Rv0739	-	hypothetical protein	18	16	14342.5	18670.9	4328.4	0.38	0.3021	1
Rv2621c	-	transcriptional regulator	5	4	2884.8	1602.1	-1282.7	-0.85	0.3027	1
Rv2996c	-	d-3-phosphoglycerate dehydrogenase SerA1	12	3	4	1.6	-2.4	-1.34	0.3028	1
Rv2903c	-	signal peptidase I LepB	12	4	4	1.6	-2.4	-1.35	0.3036	1
Rv3088	-	triacylglycerol synthase Tgs4	13	10	12321.2	17960.6	5639.4	0.54	0.3036	1
Rv0555	-	bifunctional menaquinone biosynthesis protein MenD	15	4	4	1.2	-2.8	-1.76	0.3043	1
Rv0328	-	transcriptional regulator TetR/AcrR-family	11	9	1062.9	1668.8	605.8	0.65	0.3046	1
Rv3363c	-	hypothetical protein	8	6	4923.5	2855	-2068.5	-0.79	0.305	1
Rv1747	-	transmembrane ABC transporter ATP-binding protein	34	31	94510.8	76635.5	-17875.3	-0.3	0.3051	1
Rv0743c	-	hypothetical protein	9	9	22944.9	17103.3	-5841.6	-0.42	0.306	1
Rv0773c	-	bifunctional acylase GgtA	20	15	7593.1	11317	3723.9	0.58	0.3062	1
Rv2103c	-	toxin VapC37	6	5	13494.9	8871.8	-4623	-0.61	0.3062	1
Rv0764c	-	cytochrome P450 51 Cyp51	19	16	19522	13473.2	-6048.8	-0.54	0.3064	1
Rv2179c	-	hypothetical protein	7	5	13.7	35.4	21.7	1.37	0.3064	1
Rv0684	-	elongation factor G FusA1	34	7	7	2.6	-4.4	-1.42	0.3065	1
Rv3417c	-	chaperonin 1 GroEL1	21	13	1797.4	980	-817.4	-0.88	0.3072	1
Rv0192A	-	secreted protein	3	3	3285.4	4942	1656.6	0.59	0.3075	1
Rv1293	-	diaminopimelate decarboxylase LysA	27	10	4	7.5	3.5	0.9	0.308	1
Rv2161c	-	hypothetical protein	8	8	26163	17166.6	-8996.4	-0.61	0.3088	1
Rv0857	-	hypothetical protein	9	9	9487.1	6313.4	-3173.7	-0.59	0.3089	1
Rv2824c	-	CRISPR-associated endoribonuclease cas6	17	14	30392.7	24815.7	-5577	-0.29	0.309	1
Rv3422c	-	ATPase	8	4	376.3	224.7	-151.6	-0.74	0.3096	1
Rv2993c	-	2-hydroxyhepta-2,4-diene-1,7-dioate isomerase	9	6	2826.4	1531.6	-1294.8	-0.88	0.31	1
Rv2261c	-	apolipoprotein N-acyltransferase	5	5	7901.1	5114.6	-2786.5	-0.63	0.3103	1
Rv2721c	-	alanine and glycine rich transmembrane protein	28	24	101701	78463.8	-23237.5	-0.37	0.3107	1
Rv0418	-	lipoprotein aminopeptidase LpqL	28	24	15747.3	11991.7	-3755.6	-0.39	0.3117	1
Rv1179c	-	hypothetical protein	41	32	34170.6	27927	-6243.5	-0.29	0.3117	1
Rv3727	-	oxidoreductase	42	40	58619.1	49425.2	-9193.9	-0.25	0.3119	1
Rv0741	-	transposase	4	4	2542.8	4213.3	1670.5	0.73	0.3121	1
Rv3660c	-	helicase/secretion neighborhood CpaE-like protein Ssd	6	5	1337	2407.3	1070.4	0.85	0.3121	1
Rv0968	-	hypothetical protein	6	5	10325.7	6339.3	-3986.3	-0.7	0.3123	1
Rv1984A	-	hypothetical protein	3	3	10299.9	7097.2	-3202.7	-0.54	0.3124	1
Rv2964B	-	hypothetical protein	8	8	12761.1	7762.8	-4998.3	-0.72	0.3124	1
Rv2274c	-	toxin MazF8	8	6	5445.1	3302.8	-2142.3	-0.72	0.3131	1
Rv3519	-	hypothetical protein	11	10	6909.9	4787.1	-2122.8	-0.53	0.3134	1
Rv1544	-	ketoacyl reductase	11	10	19422	26567.1	7145.1	0.45	0.3137	1
Rv2424c	-	transposase	7	7	5313.6	6904.9	1591.3	0.38	0.3154	1
Rv3255c	-	mannose-6-phosphate isomerase ManA	21	9	10.1	5.4	-4.7	-0.9	0.3154	1
Rv0916c	-	PE family protein PE7	5	4	4048.3	5900.4	1852.1	0.54	0.3162	1
Rv0113	-	sedoheptulose-7-phosphate isomerase GmhA	12	5	465.2	1016.1	550.9	1.13	0.3163	1
Rv1792	-	ESAT-6-like protein EsxK	3	3	1318.7	530.7	-787.9	-1.31	0.3163	1
Rv2901c	-	hypothetical protein	9	8	1649.2	2519.3	870.2	0.61	0.3164	1
Rv3676	-	transcriptional regulator Crp	5	5	4649.8	3255.2	-1394.6	-0.51	0.3174	1
Rv1300	-	HemK protein	14	4	3.9	1.2	-2.8	-1.74	0.3175	1
Rv2663	-	hypothetical protein	11	10	29395.7	23081.1	-6314.6	-0.35	0.3181	1
Rv0368c	-	hypothetical protein	17	15	15892	20350.8	4458.8	0.36	0.3182	1
Rv3514	-	PE-PGRS family protein PE_PGRS57	34	21	15427.6	11065.5	-4362.1	-0.48	0.3183	1
Rv2518c	-	l,d-transpeptidase LdtB	21	5	4	1.3	-2.7	-1.61	0.3185	1
Rv2047c	-	hypothetical protein	33	29	11501.3	14336	2834.7	0.32	0.3186	1
Rv2918c	-	[protein-PII] uridylyltransferase GlnD	27	22	13839.6	9643.4	-4196.2	-0.52	0.3197	1
Rv3275c	-	phosphoribosylaminoimidazole carboxylase catalytic subunit PurE	7	3	3	45.6	42.6	3.94	0.3197	1
Rv3442c	-	30S ribosomal protein S9 RpsI	6	4	4	1.3	-2.7	-1.6	0.3201	1
Rv3712	-	ligase	12	5	4	1.2	-2.8	-1.76	0.3201	1
Rv1841c	-	hypothetical protein	13	11	12064.5	16224.4	4159.9	0.43	0.3204	1
Rv2237	-	hypothetical protein	18	12	20280.1	15253.5	-5026.5	-0.41	0.3205	1
Rv1828	-	hypothetical protein	14	4	4	1.2	-2.8	-1.75	0.3207	1
Rv2804c	-	hypothetical protein	7	7	3019.3	5099.1	2079.7	0.76	0.321	1
Rv0187	-	O-methyltransferase	7	4	2891	4423	1532	0.61	0.3213	1
Rv3125c	-	PPE family protein PPE49	22	20	18876	24419.6	5543.6	0.37	0.3214	1
Rv1251c	-	hypothetical protein	61	43	32116.6	38996.8	6880.2	0.28	0.3216	1
Rv0072	-	glutamine-transport ABC transporter transmembrane protein	16	12	51205.6	37090.1	-14115.5	-0.47	0.322	1
Rv2168c	-	transposase	4	4	4350.9	2819.5	-1531.4	-0.63	0.3225	1
Rv3683	-	hypothetical protein	15	14	20652.3	14649.8	-6002.5	-0.5	0.3225	1
Rv1896c	-	hypothetical protein	24	19	17804.2	23058.6	5254.3	0.37	0.3227	1
Rv3167c	-	transcriptional regulator TetR-family	9	9	2995.4	5513.9	2518.4	0.88	0.3234	1
Rv3143	-	two-component system response regulator	4	3	3831.1	5688.9	1857.8	0.57	0.3236	1
Rv1630	-	30S ribosomal protein S1 RpsA	17	5	4	1.3	-2.7	-1.6	0.3239	1
Rv2611c	-	phosphatidylinositol mannoside acyltransferase	15	4	2	5	3	1.3	0.324	1
Rv3701c	-	hypothetical protein	16	8	1910.6	685.6	-1224.9	-1.48	0.3241	1
Rv1806	-	PE family protein PE20	6	3	633.4	1142.5	509.1	0.85	0.3243	1
Rv2701c	-	inositol-1-monophosphatase SuhB	12	11	13591.6	17394.2	3802.7	0.36	0.3246	1
Rv2289	-	CDP-diacylglycerol pyrophosphatase Cdh	23	18	34845.6	27656.3	-7189.3	-0.33	0.3247	1
Rv1325c	-	PE-PGRS family protein PE_PGRS24	10	8	1037.3	1514.2	476.9	0.55	0.3248	1
Rv2594c	-	crossover junction endodeoxyribonuclease RuvC	6	4	6.9	2.6	-4.3	-1.4	0.3248	1
Rv2402	-	hypothetical protein	28	23	46063.5	34875.5	-11187.9	-0.4	0.3253	1
Rv0317c	-	glycerophosphoryl diester phosphodiesterase GlpQ2	13	12	20782	15336.2	-5445.8	-0.44	0.3256	1
Rv2254c	-	membrane protein	8	6	5722.1	3579.9	-2142.2	-0.68	0.3257	1
Rv3025c	-	cysteine desulfurase LscS	18	7	198.1	18.9	-179.2	-3.39	0.3261	1
Rv3091	-	hypothetical protein	15	15	21350.6	16113	-5237.6	-0.41	0.3261	1
Rv0936	-	phosphate-transport ABC transporter integral membrane protein PstA2	20	18	22400.1	17639.5	-4760.6	-0.34	0.3265	1
Rv3098c	-	hypothetical protein	9	7	10354.5	6786.7	-3567.9	-0.61	0.3267	1
Rv1329c	-	ATP-dependent DNA helicase DinG	24	18	17437.2	22687.3	5250.1	0.38	0.3268	1
Rv1310	-	ATP synthase beta chain AtpD	19	5	3.9	1.3	-2.6	-1.59	0.3269	1
Rv1510	-	membrane protein	22	22	25601.1	40688.2	15087.1	0.67	0.3276	1
Rv2862A	-	antitoxin VapB23	1	1	587.4	339.9	-247.6	-0.79	0.3276	1
Rv0569	-	hypothetical protein	4	4	10540.6	5803.6	-4737	-0.86	0.3279	1
Rv1098c	-	fumarase Fum	12	4	2	5.4	3.4	1.46	0.3279	1
Rv0112	-	GDP-mannose 4,6-dehydratase Gca	31	16	5049.7	7231.4	2181.7	0.52	0.3282	1
Rv3786c	-	hypothetical protein	20	18	35135.3	26968.5	-8166.8	-0.38	0.3283	1
Rv1446c	-	OXPP cycle protein OpcA	14	11	5429.8	3220.8	-2209	-0.75	0.3284	1
Rv0024	-	secreted protein	12	11	27116.2	11455.1	-15661.1	-1.24	0.3285	1
Rv2929	-	hypothetical protein	8	7	2597.4	3933.6	1336.2	0.6	0.3287	1
Rv1556	-	regulatory protein	13	11	20910.5	13808	-7102.5	-0.6	0.3288	1
Rv2454c	-	oxidoreductase	15	4	2	5.5	3.5	1.44	0.329	1
Rv0723	-	50S ribosomal protein L15 RplO	3	3	193.9	641.4	447.6	1.73	0.3299	1
Rv3050c	-	transcriptional regulator AsnC-family	8	4	5164.1	2989.3	-2174.8	-0.79	0.3301	1
Rv2697c	-	deoxyuridine 5'-triphosphate nucleotidohydrolase Dut	5	3	5	1.2	-3.8	-2.09	0.3302	1
Rv3028c	-	electron transfer flavoprotein alpha subunit FixB	13	5	4	1.3	-2.7	-1.62	0.3307	1
Rv2624c	-	universal stress protein	11	10	3479.6	4997.2	1517.6	0.52	0.3308	1
Rv2205c	-	glycerate kinase	12	12	18629.1	12923.2	-5705.9	-0.53	0.3309	1
Rv0349	-	hypothetical protein	8	8	19977.1	24118.3	4141.2	0.27	0.331	1
Rv0851c	-	oxidoreductase	9	7	3552.4	4692	1139.6	0.4	0.3311	1
Rv3315c	-	cytidine deaminase Cdd	11	9	4109.8	6179.2	2069.5	0.59	0.3313	1
Rv2155c	-	UDP-N-acetylmuramoylalanyl-D-glutamate ligase MurD	20	7	9	5	-4	-0.85	0.3318	1
Rv1981c	-	ribonucleoside-diphosphate reductase NrdF1	24	20	53771.8	62729.4	8957.6	0.22	0.332	1
Rv3476c	-	MFS transporter, MHS family, alpha-ketoglutarate permease	33	29	32640.8	25414.7	-7226.1	-0.36	0.332	1
Rv0584	-	exported protein	62	54	82015.5	69626.9	-12388.6	-0.24	0.3329	1
Rv2738c	-	hypothetical protein	4	4	4194.4	6696.5	2502.1	0.67	0.3329	1
Rv0066c	-	isocitrate dehydrogenase Icd2	38	18	285.8	132.1	-153.7	-1.11	0.333	1
Rv3095	-	transcriptional regulator	8	8	10431.6	7044.3	-3387.3	-0.57	0.3331	1
Rv0154c	-	acyl-CoA dehydrogenase FadE2	12	12	13989.6	9865.5	-4124.1	-0.5	0.3332	1
Rv3224	-	citronellol/citronellal dehydrogenase	16	14	43665.7	51809.2	8143.5	0.25	0.3332	1
Rv2678c	-	uroporphyrinogen decarboxylase HemE	15	4	2	4.7	2.7	1.25	0.3343	1
Rv1158c	-	alanine and proline rich protein	11	4	4	11.4	7.4	1.51	0.3349	1
Rv1431	-	hypothetical protein	25	21	25649.6	20133	-5516.6	-0.35	0.3352	1
Rv3622c	-	PE family protein PE32	10	8	4320.4	3114.3	-1206.1	-0.47	0.3353	1
Rv2264c	-	proline rich protein	31	29	48065.2	38052.9	-10012.3	-0.34	0.336	1
Rv2354	-	transposase	6	6	3993.1	6719	2725.9	0.75	0.3362	1
Rv1407	-	protein Fmu	21	17	6559	4941.8	-1617.2	-0.41	0.3364	1
Rv3221c	-	biotinylated protein	3	1	403.9	685.6	281.7	0.76	0.3366	1
Rv0920c	-	transposase	22	19	7530.2	9968.3	2438	0.4	0.3368	1
Rv2512A	-	hypothetical protein	7	6	10597.2	7228.9	-3368.3	-0.55	0.3368	1
Rv2884	-	transcriptional regulator	14	11	13044.6	9856.2	-3188.3	-0.4	0.3372	1
Rv2739c	-	alanine rich transferase	6	5	244.1	518.1	274.1	1.09	0.3374	1
Rv0319	-	pyrrolidone-carboxylate peptidase Pcp	8	7	4580.9	7588	3007.1	0.73	0.3376	1
Rv2625c	-	transmembrane alanine and leucine rich protein	20	16	8982.9	11747.8	2764.9	0.39	0.3387	1
Rv0344c	-	lipoprotein LpqJ	12	12	18002.8	13233.4	-4769.4	-0.44	0.3388	1
Rv3917c	-	chromosome partitioning protein ParB	16	6	7	3.9	-3	-0.82	0.3396	1
Rv3621c	-	PPE family protein PPE65	16	16	33323.3	26843.8	-6479.5	-0.31	0.3397	1
Rv1125	-	hypothetical protein	23	19	5197.3	6713.3	1516	0.37	0.3399	1
Rv0795	-	transposase	5	5	1229.2	2031.3	802.1	0.72	0.3403	1
Rv3416	-	transcriptional regulator WhiB-like WhiB3	6	6	3883.8	5090.6	1206.7	0.39	0.3403	1
Rv2127	-	l-asparagine permease AnsP1	26	26	43017.6	52727	9709.4	0.29	0.3404	1
Rv2320c	-	cationic amino acid transport integral membrane protein RocE	29	23	16901.6	20184.8	3283.2	0.26	0.3405	1
Rv2438A	-	hypothetical protein	5	3	2016.4	556.6	-1459.9	-1.86	0.3407	1
Rv2714	-	alanine and leucine rich protein	17	17	20268.7	16094.2	-4174.4	-0.33	0.3408	1
Rv2011c	-	hypothetical protein	6	6	3448.8	2451.8	-997	-0.49	0.3411	1
Rv2528c	-	restriction system protein Mrr	10	9	14104.9	8533.8	-5571.1	-0.72	0.3414	1
Rv3357	-	antitoxin RelJ	3	3	951.9	1880	928.2	0.98	0.3414	1
Rv0688	-	oxidoreductase	19	17	22975	17669.9	-5305.1	-0.38	0.3416	1
Rv2858c	-	aldehyde dehydrogenase (NAD+)	14	9	6838.1	3624.8	-3213.3	-0.92	0.3416	1
Rv3584	-	lipoprotein LpqE	10	9	17686.5	10552.1	-7134.3	-0.75	0.3417	1
Rv2086	-	transposase	12	12	6814.3	9011.2	2197	0.4	0.3419	1
Rv1194c	-	hypothetical protein	18	17	9290.6	6595	-2695.6	-0.49	0.3423	1
Rv1587c	-	13E12 repeat family protein	15	12	7216.6	9187.3	1970.7	0.35	0.3425	1
Rv3000	-	ABC transporter permease	8	7	7220.7	5062.8	-2157.9	-0.51	0.3425	1
Rv3821	-	integral membrane protein	23	20	102350	78244.9	-24105.4	-0.39	0.3427	1
Rv0247c	-	succinate dehydrogenase [iron-sulfur subunit]	12	8	622.7	38.7	-584	-4.01	0.343	1
Rv2949c	-	chorismate-pyruvate lyase	22	10	12196.1	3999.7	-8196.4	-1.61	0.3433	1
Rv1297	-	transcription termination factor Rho	22	7	3	6.3	3.4	1.09	0.3435	1
Rv0793	-	monooxygenase	9	9	9818.5	6615.7	-3202.9	-0.57	0.3436	1
Rv3310	-	acid phosphatase SapM	20	20	16185.1	12403.7	-3781.4	-0.38	0.3437	1
Rv0395	-	hypothetical protein	8	8	7895.6	10671.3	2775.7	0.43	0.3439	1
Rv1290A	-	hypothetical protein	7	6	2534.8	3891.2	1356.4	0.62	0.3446	1
Rv1010	-	ribosomal RNA small subunit methyltransferase A	12	9	146.2	87.5	-58.6	-0.74	0.3447	1
Rv0016c	-	penicillin-binding protein PbpA	37	18	1677.6	715.1	-962.5	-1.23	0.3451	1
Rv0676c	-	transmembrane transporter MmpL5	32	30	37161.1	45063.8	7902.7	0.28	0.3454	1
Rv1210	-	DNA-3-methyladenine glycosylase I TagA	11	9	67846.4	50369.2	-17477.1	-0.43	0.3457	1
Rv1860	-	alanine and proline rich secreted protein Apa	16	14	5363.6	3555.5	-1808.1	-0.59	0.3458	1
Rv3560c	-	acyl-CoA dehydrogenase FadE30	15	10	9191.3	14633	5441.7	0.67	0.346	1
Rv2211c	-	aminomethyltransferase GcvT	19	10	2696.5	4761.3	2064.8	0.82	0.3461	1
Rv2004c	-	hypothetical protein	26	20	9716.5	7213	-2503.5	-0.43	0.3463	1
Rv3662c	-	hypothetical protein	5	3	249.3	685.5	436.2	1.46	0.3463	1
Rv1480	-	hypothetical protein	6	2	468.4	52.3	-416.1	-3.16	0.3466	1
Rv3114	-	hypothetical protein	8	5	3913	2661.3	-1251.7	-0.56	0.3467	1
Rv3409c	-	cholesterol oxidase ChoD (cholesterol-O2 oxidoreductase)	26	22	54480.4	41831.5	-12648.8	-0.38	0.3467	1
Rv1263	-	amidase AmiB2	22	21	22898.4	17625	-5273.4	-0.38	0.3475	1
Rv1530	-	alcohol dehydrogenase Adh	25	21	3930.6	5810.3	1879.7	0.56	0.3481	1
Rv0050	-	bifunctional penicillin-binding protein 1A/1B PonA1	37	27	9439.3	6903	-2536.3	-0.45	0.3482	1
Rv0419	-	lipoprotein peptidase LpqM	23	19	25218.3	19689.1	-5529.2	-0.36	0.3482	1
Rv1712	-	cytidylate kinase Cmk	13	5	1728.1	3223.6	1495.5	0.9	0.3484	1
Rv0625c	-	TVP38/TMEM64 family membrane protein	10	8	13614.3	8579	-5035.3	-0.67	0.3487	1
Rv3811	-	hypothetical protein	28	26	26346.6	21761.9	-4584.8	-0.28	0.3489	1
Rv0313	-	hypothetical protein	5	5	6191.9	4240.6	-1951.4	-0.55	0.3493	1
Rv3494c	-	MCE-family protein Mce4F	26	20	35578.8	29109	-6469.8	-0.29	0.3493	1
Rv0590	-	MCE-family protein Mce2B	11	8	2275.3	3396.1	1120.8	0.58	0.3495	1
Rv2928	-	thioesterase TesA	28	6	2289.1	3545.8	1256.7	0.63	0.3501	1
Rv0971c	-	enoyl-CoA hydratase EchA7	7	7	7267.7	10525.7	3257.9	0.53	0.3512	1
Rv2761c	-	type I restriction/modification system specificity determinant HsdS	26	18	18620.5	13660.3	-4960.2	-0.45	0.3514	1
Rv3818	-	N-acetylmuramic acid hydroxylase	34	26	16964.1	21893.9	4929.8	0.37	0.3514	1
Rv2690c	-	integral membrane protein	32	12	16.1	60.3	44.2	1.91	0.3515	1
Rv3066	-	transcriptional regulator DeoR-family	10	9	3823.3	2514.4	-1308.9	-0.6	0.3522	1
Rv2634c	-	PE-PGRS family protein PE_PGRS46	33	28	33508	27075.5	-6432.5	-0.31	0.3525	1
Rv1435c	-	proline and glycine and valine rich secreted protein	16	10	7220.4	9556	2335.6	0.4	0.353	1
Rv1203c	-	hypothetical protein	8	6	5661.9	8002.6	2340.8	0.5	0.3534	1
Rv3202c	-	ATP-dependent DNA helicase	29	24	21893.7	17121.6	-4772.2	-0.35	0.3535	1
Rv0696	-	mycofactocin system glycosyltransferase	27	22	15811.9	12266.3	-3545.5	-0.37	0.3536	1
Rv3166c	-	hypothetical protein	15	13	12341.3	8985.6	-3355.7	-0.46	0.3542	1
Rv1838c	-	toxin VapC13	10	10	20353.7	26381.1	6027.3	0.37	0.3543	1
Rv2375	-	hypothetical protein	9	9	15016	19481.7	4465.6	0.38	0.3544	1
Rv2774c	-	hypothetical protein	3	3	3628	2416.2	-1211.8	-0.59	0.3554	1
Rv0039c	-	transmembrane protein	4	4	7627.3	5755.1	-1872.2	-0.41	0.3568	1
Rv0084	-	formate hydrogenlyase HycD	9	8	1805.5	3996.6	2191.1	1.15	0.3568	1
Rv0636	-	(3R)-hydroxyacyl-ACP dehydratase subunit HadB	8	3	138.1	9.9	-128.2	-3.81	0.3568	1
Rv0890c	-	transcriptional regulator LuxR-family	48	44	78374.5	60172.9	-18201.5	-0.38	0.3571	1
Rv2014	-	transposase	4	4	3790.3	5031.6	1241.3	0.41	0.3571	1
Rv2389c	-	esuscitation-promoting factor RpfD	10	10	28781	22737.9	-6043.1	-0.34	0.3572	1
Rv1469	-	cation transporter P-type ATPase CtpD	21	17	15426.8	11774.9	-3652	-0.39	0.3574	1
Rv3735	-	hypothetical protein	10	10	11591	15906.9	4315.9	0.46	0.3579	1
Rv1829	-	hypothetical protein	10	8	5043.8	2856.6	-2187.2	-0.82	0.3582	1
Rv1172c	-	PE family protein PE12	16	13	15734.4	12123.8	-3610.6	-0.38	0.3584	1
Rv3680	-	anion transporter ATPase	21	14	314.2	100.6	-213.7	-1.64	0.3585	1
Rv0115	-	d-alpha-d-heptose-7-phosphate kinase HddA	19	17	14940.6	11907.8	-3032.7	-0.33	0.3586	1
Rv1495	-	toxin MazF4	6	6	5342.6	2890.3	-2452.3	-0.89	0.3588	1
Rv1363c	-	membrane protein	7	7	4954.7	7346.5	2391.8	0.57	0.359	1
Rv2467	-	aminopeptidase PepN	39	33	4596.2	3584.3	-1011.9	-0.36	0.359	1
Rv2950c	-	fatty-acid-AMP ligase FadD29	45	35	29703.7	24400	-5303.7	-0.28	0.3591	1
Rv1698	-	outer membrane protein MctB	14	8	4927.6	3092	-1835.6	-0.67	0.3593	1
Rv3205c	-	hypothetical protein	15	10	2918.1	5356.8	2438.7	0.88	0.3593	1
Rv2813	-	hypothetical protein	11	9	4395.1	7128.6	2733.5	0.7	0.3594	1
Rv3172c	-	hypothetical protein	18	13	23345.7	17837	-5508.8	-0.39	0.3595	1
Rv3148	-	NADH dehydrogenase subunit D NuoD	22	15	7462.7	10394.3	2931.6	0.48	0.3596	1
Rv1402	-	primosomal protein N' PriA	28	9	10	6.3	-3.7	-0.67	0.3598	1
Rv3470c	-	acetolactate synthase large subunit IlvB2	21	18	11692.3	14936.4	3244.1	0.35	0.3601	1
Rv3386	-	transposase	12	11	11979.7	17542.6	5562.9	0.55	0.3603	1
Rv3666B	-	hypothetical protein	5	4	1779.7	2447.4	667.7	0.46	0.3606	1
Rv3223c	-	RNA polymerase sigma factor SigH	15	14	4141.9	2780	-1361.9	-0.58	0.3609	1
Rv0379	-	preprotein translocase subunit SecE2	4	4	3050.9	1793.8	-1257	-0.77	0.3612	1
Rv2067c	-	hypothetical protein	34	24	30586	22851	-7735	-0.42	0.3619	1
Rv2032	-	hypothetical protein	19	17	11220.8	7605.1	-3615.7	-0.56	0.3621	1
Rv1050	-	oxidoreductase	12	10	11037.1	13848.2	2811.1	0.33	0.3622	1
Rv3400	-	beta-phosphoglucomutase family hydrolase	11	10	7840	11806.5	3966.4	0.59	0.3623	1
Rv3191c	-	transposase	19	17	23765.4	19137.9	-4627.5	-0.31	0.3628	1
Rv0922	-	transposase	18	15	41900.5	33652.6	-8247.9	-0.32	0.3636	1
Rv3226c	-	hypothetical protein	6	6	24510.7	15221.5	-9289.2	-0.69	0.3638	1
Rv1699	-	CTP synthase PyrG	37	7	38.2	208.5	170.2	2.45	0.3639	1
Rv0642c	-	methoxy mycolic acid synthase 4 MmaA4	18	17	17736.7	24462.9	6726.2	0.46	0.364	1
Rv2892c	-	PPE family protein PPE45	21	18	43764.8	33107.2	-10657.5	-0.4	0.3642	1
Rv1568	-	adenosylmethionine-8-amino-7-oxononanoate aminotransferase BioA	16	14	23180.2	18222.8	-4957.4	-0.35	0.3644	1
Rv2742c	-	arginine rich protein	15	14	32206.6	25561	-6645.7	-0.33	0.3645	1
Rv2865	-	antitoxin RelF	2	2	2456.2	1574.4	-881.8	-0.64	0.3645	1
Rv0089	-	methyltransferase	10	7	11900.5	8185.2	-3715.3	-0.54	0.3646	1
Rv2631	-	hypothetical protein	22	19	20517.7	14745.1	-5772.6	-0.48	0.3648	1
Rv3350c	-	PPE family protein PPE56	132	106	175590	157017	-18572.8	-0.16	0.365	1
Rv0744Ac	-	mycolyltransferase II	1	1	1404.6	848.2	-556.3	-0.73	0.3655	1
Rv0217c	-	esterase LipW	21	17	14157.5	11359.2	-2798.3	-0.32	0.3661	1
Rv1288	-	mycolyltransferase II	34	33	43725.6	50014	6288.4	0.19	0.3661	1
Rv1018c	-	UDP-N-acetylglucosamine pyrophosphorylase GlmU	24	11	9.9	6.4	-3.4	-0.62	0.3662	1
Rv3613c	-	hypothetical protein	1	1	88.2	167.7	79.5	0.93	0.3666	1
Rv1031	-	potassium-transporting P-type ATPase C chain KdpC	10	10	5400.4	7687.7	2287.3	0.51	0.367	1
Rv0544c	-	transmembrane protein	6	5	3203.7	2141	-1062.7	-0.58	0.368	1
Rv1956	-	antitoxin HigA	8	7	11819.1	8408.7	-3410.4	-0.49	0.3683	1
Rv0025	-	hypothetical protein	7	7	4741.6	6337.2	1595.6	0.42	0.3696	1
Rv1126c	-	hypothetical protein	10	7	261.8	983.5	721.7	1.91	0.3697	1
Rv3898c	-	hypothetical protein	6	6	9414.4	7481.5	-1932.9	-0.33	0.3699	1
Rv2953	-	trans-acting enoyl reductase	26	22	32989.6	25386.2	-7603.4	-0.38	0.37	1
Rv0468	-	3-hydroxybutyryl-CoA dehydrogenase FadB	13	12	2974.4	2183.1	-791.3	-0.45	0.3701	1
Rv0969	-	metal cation transporter P-type ATPase CtpV	21	18	15773.7	19399	3625.3	0.3	0.3703	1
Rv2114	-	hypothetical protein	15	14	19336.2	23213.3	3877.1	0.26	0.3706	1
Rv1373	-	glycolipid sulfotransferase	19	19	35217.6	41671.3	6453.7	0.24	0.3709	1
Rv3875	-	early secretory antigenic target EsxA	9	7	9788.8	7277.3	-2511.4	-0.43	0.371	1
Rv1848	-	urease gamma subunit UreA	2	2	3192.7	1769.5	-1423.1	-0.85	0.3719	1
Rv0375c	-	carbon-monoxide dehydrogenase medium subunit	8	7	4448.7	2582.7	-1866	-0.78	0.372	1
Rv2955c	-	FkbM family methyltransferase	20	17	24699.4	18856	-5843.4	-0.39	0.372	1
Rv0284	-	ESX-3 secretion system protein EccC3	61	21	23.9	16.8	-7.1	-0.51	0.3722	1
Rv0080	-	hypothetical protein	4	3	1899.9	2836.9	937	0.58	0.3723	1
Rv1323	-	acetyl-CoA acetyltransferase FadA4	15	13	4452.6	6192.4	1739.7	0.48	0.3726	1
Rv0434	-	hypothetical protein	14	10	14731.1	18867.2	4136.1	0.36	0.3727	1
Rv1905c	-	d-amino acid oxidase Aao	18	16	34381.5	27533.8	-6847.6	-0.32	0.3731	1
Rv1752	-	hypothetical protein	5	5	3341.2	5877.4	2536.2	0.81	0.3733	1
Rv3784	-	dTDP-glucose 4,6-dehydratase	31	30	50314.7	42973.8	-7340.9	-0.23	0.3734	1
Rv0930	-	phosphate-transport ABC transporter integral membrane protein PstA1	16	14	226970	180254	-46715.3	-0.33	0.3736	1
Rv3304	-	hypothetical protein	11	8	2774.5	5476.6	2702	0.98	0.3736	1
Rv0960	-	toxin VapC9	7	6	3732.7	5698.9	1966.2	0.61	0.3739	1
Rv2219A	-	membrane protein	3	3	3478.9	1989.5	-1489.4	-0.81	0.3742	1
Rv0813c	-	fatty acid-binding protein-like protein	13	13	13259.1	10451.8	-2807.4	-0.34	0.3743	1
Rv0343	-	isoniazid inducible protein IniC	13	10	14637.2	10800.4	-3836.9	-0.44	0.3746	1
Rv1660	-	chalcone synthase Pks10	11	10	12936.4	9073.8	-3862.6	-0.51	0.3748	1
Rv3160c	-	transcriptional regulator TetR-family	8	8	223.1	375.3	152.2	0.75	0.3756	1
Rv3247c	-	thymidylate kinase Tmk	10	3	1658.8	3914.1	2255.3	1.24	0.3758	1
Rv1658	-	argininosuccinate synthase ArgG	18	9	8	5	-3	-0.68	0.3765	1
Rv3353c	-	oxidoreductase	6	6	1881.6	3434.5	1552.9	0.87	0.3765	1
Rv3910	-	integral membrane protein MviN	56	28	31589.4	22310.2	-9279.2	-0.5	0.3765	1
Rv1009	-	resuscitation-promoting factor RpfB	12	11	4026.5	6607.2	2580.7	0.71	0.3772	1
Rv0376c	-	xanthine dehydrogenase accessory factor	21	16	18306.4	14624.3	-3682.1	-0.32	0.3775	1
Rv1863c	-	integral membrane protein	10	9	30657	22367.6	-8289.4	-0.45	0.3775	1
Rv3764c	-	OmpR family two-component system sensor histidine kinase	16	11	9856.1	5208.1	-4648	-0.92	0.3776	1
Rv1706A	-	hypothetical protein	2	2	5207.4	1572	-3635.4	-1.73	0.3781	1
Rv3751	-	integrase	5	3	1264.7	638.5	-626.3	-0.99	0.3781	1
Rv2776c	-	oxidoreductase	14	11	22158.7	11520.4	-10638.3	-0.94	0.3784	1
Rv3574	-	transcriptional regulator KstR	12	8	4678.9	2124.2	-2554.6	-1.14	0.3794	1
Rv1030	-	potassium-transporting P-type ATPase B chain KdpB	15	13	5580.9	7280.3	1699.4	0.38	0.3795	1
Rv0464c	-	alkylhydroperoxidase AhpD family core domain-containing protein	15	11	22151.6	17447	-4704.6	-0.34	0.3802	1	*
Rv1578c	-	prophage PhiRv1 protein	4	3	901.3	1678.8	777.4	0.9	0.3803	1
Rv0151c	-	PE family protein PE1	44	41	64110.7	73232.7	9122	0.19	0.3804	1
Rv2708c	-	hypothetical protein	7	6	10227.7	7497.8	-2730	-0.45	0.3805	1
Rv1075c	-	exported protein	18	17	20007.3	25210.6	5203.2	0.33	0.3806	1
Rv0191	-	integral membrane protein	19	18	37178.8	30878	-6300.8	-0.27	0.3808	1
Rv1703c	-	catechol-O-methyltransferase	16	14	38414.2	29892.9	-8521.3	-0.36	0.3808	1
Rv3232c	-	polyphosphate kinase Ppk2	24	22	49054.8	55985.4	6930.6	0.19	0.381	1
Rv0790c	-	hypothetical protein	21	16	42519.9	33410.4	-9109.5	-0.35	0.3812	1
Rv3077	-	hydrolase	37	33	61912.2	47955.1	-13957.1	-0.37	0.3814	1
Rv0691c	-	mycofactocin system transcriptional regulator	9	7	2343.7	3124.4	780.7	0.41	0.3815	1
Rv2361c	-	long-chain (C50) Z-isoprenyl diphosphate synthase	19	4	2	4.2	2.2	1.08	0.3816	1
Rv0783c	-	multidrug resistance integral membrane efflux protein EmrB	27	17	18219.7	13883.6	-4336.1	-0.39	0.3818	1
Rv3894c	-	ESX-2 secretion system protein EccC2	49	45	55143.5	45993.9	-9149.5	-0.26	0.3827	1
Rv0081	-	ArsR family transcriptional regulator	5	5	5372.3	7284.6	1912.3	0.44	0.3829	1
Rv2013	-	transposase	2	2	1718.9	609.8	-1109.1	-1.49	0.3838	1
Rv1211	-	hypothetical protein	5	4	46938	30158.6	-16779.4	-0.64	0.3839	1
Rv2989	-	transcriptional regulator	9	8	927.6	1443.3	515.7	0.64	0.3839	1
Rv2468A	-	hypothetical protein	3	3	12656.6	8571.4	-4085.3	-0.56	0.384	1
Rv2968c	-	integral membrane protein	11	4	423.8	34	-389.8	-3.64	0.3841	1
Rv1628c	-	hypothetical protein	7	5	16793	11193.9	-5599	-0.59	0.3846	1
Rv2041c	-	sugar-binding lipoprotein	25	22	16538.8	13165.4	-3373.3	-0.33	0.385	1
Rv2048c	-	polyketide synthase Pks12	150	106	44074.3	50896.5	6822.2	0.21	0.3854	1
Rv1349	-	iron-regulated transporter IrtB	20	10	41.4	10.4	-31	-2	0.3856	1
Rv0312	-	proline and threonine rich protein	22	15	3586.4	5030.8	1444.4	0.49	0.3858	1
Rv0206c	-	transmembrane transporter MmpL3	34	9	631.1	258.7	-372.4	-1.29	0.3868	1
Rv0934	-	periplasmic phosphate-binding lipoprotein PstS1	22	20	26528.3	45992.1	19463.9	0.79	0.3868	1
Rv2225	-	3-methyl-2-oxobutanoate hydroxymethyltransferase PanB	15	4	2	4.3	2.3	1.12	0.3868	1
Rv3585	-	DNA repair protein RadA	22	19	32457.4	25685.1	-6772.3	-0.34	0.3869	1
Rv1508A	-	hypothetical protein	15	11	13439.9	10047.9	-3391.9	-0.42	0.3872	1
Rv3761c	-	acyl-CoA dehydrogenase FadE36	17	16	17411.3	13813.4	-3598	-0.33	0.3873	1
Rv0631c	-	exonuclease V gamma chain RecC	19	14	16999.7	11942.3	-5057.4	-0.51	0.3874	1
Rv1921c	-	lipoprotein LppF	23	20	52082.8	43787.2	-8295.6	-0.25	0.3875	1
Rv2066	-	CobI-COBJ fusion protein	22	21	39866.3	31866.9	-7999.3	-0.32	0.3879	1
Rv0577	-	antigen Cfp30B	14	13	18004.5	23556.6	5552.2	0.39	0.3883	1
Rv1085c	-	hemolysin-like protein	11	10	28502.9	22269.9	-6233	-0.36	0.3886	1
Rv1804c	-	hypothetical protein	10	9	9589.2	12934.3	3345.1	0.43	0.3886	1
Rv0558	-	ubiquinone/menaquinone biosynthesis methyltransferase MenH	14	5	2	3.8	1.8	0.94	0.3888	1
Rv2883c	-	uridylate kinase PyrH	10	4	2	3.9	1.9	0.98	0.3888	1
Rv0838	-	lipoprotein LpqR	7	7	5284	3607	-1677	-0.55	0.3891	1
Rv1294	-	homoserine dehydrogenase ThrA	24	5	5	2.5	-2.5	-0.99	0.3891	1
Rv2535c	-	cytoplasmic peptidase PepQ	19	12	240.7	74.1	-166.5	-1.7	0.3892	1
Rv2000	-	hypothetical protein	36	34	66984.7	57911.8	-9073	-0.21	0.3895	1
Rv2133c	-	hypothetical protein	9	9	10723.2	7963.1	-2760.2	-0.43	0.3898	1
Rv3136	-	PPE family protein PPE51	21	21	3427.9	2509.9	-918	-0.45	0.3899	1
Rv2442c	-	50S ribosomal protein L21 RplU	4	1	3	0	-3	0.02	0.3906	1
Rv2502c	-	acetyl-/propionyl-CoA carboxylase beta subunit AccD1	29	22	18881.4	23793.8	4912.4	0.33	0.391	1
Rv2380c	-	peptide synthetase MbtE	79	43	321.4	445.5	124.1	0.47	0.3915	1
Rv2610c	-	GDP-mannose-dependent alpha-(1-2)-phosphatidylinositol mannosyltransferase PimA	16	5	2	3.9	2	1.01	0.3915	1
Rv0491	-	two-component system sensory transduction protein RegX3	10	8	17082.8	10770.8	-6312	-0.67	0.3918	1
Rv2411c	-	hypothetical protein	24	24	47674.3	37310.6	-10363.7	-0.35	0.392	1
Rv0500B	-	hypothetical protein	2	2	193.3	431	237.8	1.16	0.3921	1
Rv2387	-	hypothetical protein	25	24	47452.8	40603	-6849.8	-0.22	0.3921	1
Rv2588c	-	preprotein translocase subunit YajC	2	2	4333.4	6344.6	2011.2	0.55	0.3923	1
Rv0099	-	fatty-acid-CoA ligase FadD10	32	24	18925.3	13677	-5248.2	-0.47	0.3928	1
Rv1267c	-	transcriptional regulator EmbR	20	15	28432.1	22539.5	-5892.6	-0.34	0.3928	1
Rv3808c	-	UDP-galactofuranosyl transferase GlfT2	35	10	7	10.5	3.5	0.58	0.3929	1
Rv1904	-	anti-anti-sigma factor	10	9	40776.1	28552.8	-12223.3	-0.51	0.3934	1
Rv2265	-	integral membrane protein	17	17	16181.1	19423.2	3242.1	0.26	0.3936	1
Rv1772	-	hypothetical protein	5	4	2279.8	1394.9	-884.9	-0.71	0.3938	1
Rv3794	-	integral membrane indolylacetylinositol arabinosyltransferase EmbA	53	22	4528.4	2112.5	-2415.9	-1.1	0.3939	1
Rv0045c	-	hydrolase	7	5	11129.4	5668	-5461.3	-0.97	0.3945	1
Rv2250c	-	transcriptional regulator	12	10	15782.4	11314	-4468.4	-0.48	0.3948	1
Rv3776	-	hypothetical protein	27	24	17419.4	24276.2	6856.8	0.48	0.3951	1
Rv1572c	-	hypothetical protein	1	1	1	24.9	23.9	4.64	0.3952	1
Rv1298	-	50S ribosomal protein L31 RpmE	7	5	665.2	163.1	-502.1	-2.03	0.3955	1
Rv2121c	-	ATP phosphoribosyltransferase HisG	9	5	2	3.9	2	0.99	0.3962	1
Rv3565	-	aspartate aminotransferase AspB	21	15	9699.4	6051.5	-3647.8	-0.68	0.3962	1
Rv3309c	-	uracil phosphoribosyltransferase Upp	14	12	19992.6	23990.7	3998.1	0.26	0.3964	1
Rv3580c	-	cysteinyl-tRNA synthetase CysS1	30	8	1509.3	570.5	-938.8	-1.4	0.3964	1
Rv0281	-	s-adenosylmethionine-dependent methyltransferase	14	13	15493.9	18875.5	3381.5	0.28	0.397	1
Rv3435c	-	transmembrane protein	10	10	5886.2	8090.2	2204	0.46	0.397	1
Rv3447c	-	ESX-4 secretion system protein EccC4	52	37	23641.9	28926.7	5284.9	0.29	0.3973	1
Rv1463	-	ABC transporter ATP-binding protein	12	5	2	3.7	1.7	0.89	0.3978	1
Rv1762c	-	hypothetical protein	10	9	9531.5	13664.1	4132.6	0.52	0.3979	1
Rv0351	-	protein GrpE	9	3	136.2	308.3	172.1	1.18	0.3981	1
Rv0678	-	hypothetical protein	5	4	2905	3759.5	854.5	0.37	0.3984	1
Rv0608	-	antitoxin VapB28	2	1	223.5	303.1	79.6	0.44	0.3985	1
Rv1826	-	glycine cleavage system H protein GcvH	9	1	3	0	-3	0	0.399	1
Rv0362	-	Mg2+ transport transmembrane protein MgtE	16	14	30777.1	24886.5	-5890.6	-0.31	0.3997	1
Rv2377c	-	protein MbtH	2	1	0	14.7	14.7	2.29	0.3997	1
Rv1239c	-	magnesium and cobalt transporter CorA	25	20	20084.6	16976.7	-3107.9	-0.24	0.3998	1
Rv3709c	-	aspartokinase Ask	16	7	2438.4	1310.3	-1128.1	-0.9	0.4	1
Rv1028A	-	potassium-transporting membrane protein KdpF	3	1	508.9	791.9	283	0.64	0.4007	1
Rv0229Ac	-	antitoxin	2	1	29.4	54	24.5	0.87	0.4009	1
Rv0579	-	hypothetical protein	15	12	12173.6	15059.8	2886.2	0.31	0.4009	1
Rv0650	-	glucokinase	6	6	11144.1	8631.5	-2512.7	-0.37	0.4009	1
Rv2806	-	membrane protein	8	7	18815	9357.6	-9457.4	-1.01	0.4009	1
Rv1711	-	pseudouridine synthase	10	5	2	4.2	2.2	1.1	0.4013	1
Rv0482	-	UDP-N-acetylenolpyruvoylglucosamine reductase MurB	14	4	7839.5	3749.7	-4089.7	-1.06	0.4014	1
Rv0238	-	transcriptional regulator TetR-family	13	8	3488	2066.9	-1421.1	-0.75	0.4017	1
Rv0386	-	transcriptional regulator LuxR/UhpA-family	44	37	56003.2	47167.1	-8836.1	-0.25	0.4017	1
Rv2780	-	secreted L-alanine dehydrogenase Ald	25	20	7121.8	9211.2	2089.4	0.37	0.4017	1
Rv2741	-	PE-PGRS family protein PE_PGRS47	24	21	36177.3	28910.3	-7267	-0.32	0.4026	1
Rv1094	-	acyl carrier protein desaturase DesA2	13	4	105.4	475.8	370.4	2.17	0.4029	1
Rv3801c	-	fatty-acid-AMP ligase FadD32	28	10	9.1	5.3	-3.8	-0.79	0.4035	1
Rv0979A	-	50S ribosomal protein L32 RpmF	2	1	83.8	325.2	241.4	1.96	0.4038	1
Rv3694c	-	transmembrane protein	19	17	32124.2	38269.9	6145.6	0.25	0.4038	1
Rv3401	-	trehalose-6P phosphatase	39	37	49393.3	40702.7	-8690.6	-0.28	0.4041	1
Rv1114	-	toxin VapC32	3	3	5855.1	3890.1	-1965	-0.59	0.4049	1
Rv2924c	-	formamidopyrimidine-DNA glycosylase Fpg	14	14	32385.2	25696.7	-6688.5	-0.33	0.405	1
Rv3059	-	cytochrome P450 136 Cyp136	24	21	30254.8	25229.2	-5025.6	-0.26	0.4052	1
Rv3420c	-	ribosomal-protein-alanine acetyltransferase RimI	7	7	3125.2	1937.4	-1187.8	-0.69	0.4056	1
Rv3639c	-	hypothetical protein	12	10	6064	3360.2	-2703.8	-0.85	0.4058	1
Rv0125	-	serine protease PepA	10	10	5471.9	3736.3	-1735.6	-0.55	0.4062	1
Rv3118	-	hypothetical protein	3	3	4663.3	7122.6	2459.3	0.61	0.4065	1
Rv3173c	-	transcriptional regulator TetR/AcrR-family	7	4	2418.5	1518.4	-900.1	-0.67	0.4065	1
Rv3372	-	trehalose-6-phosphate phosphatase OtsB2	10	5	6309	3566.9	-2742.2	-0.82	0.4065	1
Rv3598c	-	lysyl-tRNA synthetase 1 LysS	31	6	4847	2159.1	-2688	-1.17	0.4068	1
Rv2239c	-	hypothetical protein	5	1	1547.4	643.2	-904.1	-1.27	0.407	1
Rv1498c	-	methyltransferase	16	14	21751.6	25966.5	4214.9	0.26	0.4071	1
Rv3775	-	lipase LipE	29	25	48274.5	40314.4	-7960.1	-0.26	0.4072	1
Rv0153c	-	phosphotyrosine protein phosphatase PtpB	11	10	5810	4004	-1806	-0.54	0.4076	1
Rv3010c	-	6-phosphofructokinase PfkA	12	11	8725.5	6475.8	-2249.7	-0.43	0.4076	1
Rv1980c	-	immunogenic protein MPT64	19	16	40022.6	46757.9	6735.4	0.22	0.4081	1
Rv1726	-	oxidoreductase	16	14	34343.4	23665.1	-10678.3	-0.54	0.4082	1
Rv2875	-	immunogenic protein MPT70	12	11	15058.2	18645.8	3587.6	0.31	0.4082	1
Rv3879c	-	ESX-1 secretion-associated protein EspK	38	32	44607.3	37370.9	-7236.3	-0.26	0.4082	1
Rv0306	-	cob(II)yrinic acid a,c-diamide reductase	8	7	9528.2	6988.3	-2539.8	-0.45	0.4085	1
Rv0836c	-	hypothetical protein	9	8	8820.5	11604.3	2783.8	0.4	0.4087	1
Rv0791c	-	hypothetical protein	13	12	10236.8	7742.4	-2494.4	-0.4	0.4088	1
Rv2532c	-	N utilization substance protein NusB	5	5	8322.6	5278.2	-3044.4	-0.66	0.4088	1
Rv2998	-	hypothetical protein	5	4	4843.7	3276.3	-1567.4	-0.56	0.4088	1
Rv3570c	-	oxidoreductase	27	20	3992.4	5081.8	1089.4	0.35	0.4091	1
Rv0562	-	polyprenyl-diphosphate synthase GrcC1	15	4	2347.5	861.4	-1486	-1.45	0.4094	1
Rv3778c	-	cysteine desulfurase	22	14	4763.3	7894.7	3131.4	0.73	0.4097	1
Rv2935	-	phenolpthiocerol synthesis type-I polyketide synthase PpsE	68	26	45.7	27.2	-18.5	-0.75	0.4098	1
Rv2829c	-	toxin VapC22	4	4	1943.6	2865.3	921.7	0.56	0.4099	1
Rv3616c	-	ESX-1 secretion-associated protein EspA	20	14	20427.5	14921.2	-5506.3	-0.45	0.4102	1
Rv3738c	-	PPE family protein PPE66	26	21	37202	29679.4	-7522.6	-0.33	0.4102	1
Rv1419	-	lectin	6	5	4596.7	2861.9	-1734.8	-0.68	0.4105	1
Rv1679	-	acyl-CoA dehydrogenase FadE16	11	9	5322.3	6995.2	1672.9	0.39	0.4107	1
Rv3682	-	bifunctional membrane-associated penicillin-binding protein 1A/1B PonA2	39	21	7209.5	4171.6	-3037.9	-0.79	0.4107	1
Rv3833	-	transcriptional regulator	9	8	5379	7801.3	2422.3	0.54	0.4108	1
Rv1388	-	integration host factor MihF	7	1	2	0	-2	0.57	0.4112	1
Rv2061c	-	hypothetical protein	6	6	11673.2	8880.3	-2792.9	-0.39	0.4112	1
Rv0136	-	cytochrome P450 138 Cyp138	23	21	34231.2	27712.9	-6518.2	-0.3	0.4126	1
Rv3500c	-	ABC transporter permease YrbE4B	20	17	46976.9	38992.9	-7983.9	-0.27	0.4128	1
Rv2680	-	hypothetical protein	11	6	452.6	277.9	-174.7	-0.7	0.4129	1
Rv1053c	-	hypothetical protein	6	5	2287	4066.3	1779.3	0.83	0.413	1
Rv2277c	-	glycerolphosphodiesterase	12	10	5824.1	3499.8	-2324.3	-0.73	0.4132	1
Rv3869	-	ESX-1 secretion system protein EccB1	29	24	48231.9	41064.2	-7167.7	-0.23	0.4133	1
Rv2922c	-	chromosome partition protein Smc	41	32	14068.5	11516.8	-2551.7	-0.29	0.4138	1
Rv3105c	-	peptide chain release factor 2 PrfB	18	7	4233.7	2356.1	-1877.6	-0.85	0.414	1
Rv1533	-	hypothetical protein	11	9	9001.9	5372.8	-3629.1	-0.74	0.4142	1
Rv0458	-	aldehyde dehydrogenase (NAD+)	23	21	43587.7	35060.8	-8526.9	-0.31	0.4143	1
Rv0318c	-	ZIP family zinc transporter	8	8	8558.1	6747	-1811.1	-0.34	0.4144	1
Rv0044c	-	oxidoreductase	20	16	13295.3	16574.7	3279.4	0.32	0.4145	1
Rv1485	-	ferrochelatase HemZ	25	11	11	6.8	-4.2	-0.69	0.4145	1
Rv3655c	-	hypothetical protein	6	6	3240.4	4261.9	1021.5	0.4	0.4145	1
Rv2272	-	transmembrane protein	4	3	4043.2	2071.8	-1971.4	-0.96	0.4146	1
Rv2342	-	hypothetical protein	3	3	1708.9	1085.4	-623.5	-0.65	0.4146	1
Rv0667	-	DNA-directed RNA polymerase RpoB	39	6	3	4.7	1.7	0.66	0.4147	1
Rv1532c	-	hypothetical protein	5	4	2170.3	3163.4	993.1	0.54	0.4149	1
Rv3679	-	anion transporter ATPase	14	7	245.2	59.7	-185.5	-2.04	0.4149	1
Rv0079	-	hypothetical protein	14	12	15258	11397.9	-3860.1	-0.42	0.416	1
Rv3213c	-	chromosome partitioning protein	12	11	6270.4	4639.7	-1630.7	-0.43	0.416	1
Rv3235	-	alanine and arginine and proline rich protein	6	5	4605.9	7113.7	2507.8	0.63	0.4161	1
Rv0407	-	F420-dependent glucose-6-phosphate dehydrogenase Fgd1	20	17	2100	2780.9	680.9	0.41	0.4163	1
Rv2134c	-	hypothetical protein	8	8	4829.4	3493.4	-1336	-0.47	0.4164	1
Rv3518c	-	cytochrome P450 monooxygenase 142 Cyp142	16	13	8819.8	11714.9	2895.1	0.41	0.417	1
Rv0294	-	trans-aconitate methyltransferase Tam	14	12	17086	12135.1	-4950.9	-0.49	0.4171	1
Rv3628	-	inorganic pyrophosphatase Ppa	7	4	8284.8	3934.3	-4350.6	-1.07	0.4174	1
Rv1394c	-	cytochrome P450 132 Cyp132	19	17	21634.6	26487	4852.4	0.29	0.4175	1
Rv2362c	-	DNA repair protein RecO	11	7	470.2	793.7	323.5	0.76	0.4175	1
Rv2137c	-	hypothetical protein	6	6	2615.1	3935.8	1320.7	0.59	0.4176	1
Rv0606	-	transposase	9	6	8501.9	6358.1	-2143.7	-0.42	0.4179	1
Rv2706c	-	hypothetical protein	2	2	3210.7	1500.3	-1710.4	-1.1	0.4183	1
Rv3872	-	PE family protein PE35	4	4	9771.8	6646.3	-3125.5	-0.56	0.4188	1
Rv1414	-	hypothetical protein	4	4	1135.6	1637.8	502.2	0.53	0.419	1
Rv1433	-	exported protein	18	16	29334.7	33043.8	3709.1	0.17	0.4193	1
Rv3870	-	ESX-1 secretion system protein EccCa1	37	31	61547.2	53435.8	-8111.4	-0.2	0.4193	1
Rv2074	-	pyridoxamine 5'-phosphate oxidase	6	5	3144.8	5922.8	2778	0.91	0.4194	1
Rv2743c	-	alanine rich transmembrane protein	12	9	20147.2	16238.6	-3908.7	-0.31	0.4199	1
Rv2853	-	PE-PGRS family protein PE_PGRS48	34	30	35635.7	31375.8	-4259.9	-0.18	0.42	1
Rv1765c	-	hypothetical protein	7	6	1784.9	2911.1	1126.2	0.71	0.421	1
Rv2597	-	membrane protein	8	8	30227.5	24778.5	-5449	-0.29	0.4211	1
Rv3346c	-	transmembrane protein	3	3	11890.9	6712.8	-5178	-0.82	0.4212	1
Rv3257c	-	phosphomannomutase PmmA	24	7	7	4.3	-2.6	-0.68	0.4214	1
Rv3885c	-	ESX-2 secretion system protein EccE2	28	22	23721.2	18516.9	-5204.3	-0.36	0.4215	1
Rv2323c	-	hypothetical protein	22	19	28594.2	20743.6	-7850.6	-0.46	0.4218	1
Rv2171	-	lipoprotein LppM	9	8	3192.9	3985.3	792.4	0.32	0.422	1
Rv0750	-	hypothetical protein	5	4	1342.4	1866.8	524.4	0.48	0.4223	1
Rv2630	-	hypothetical protein	10	8	3252.4	4125.4	873	0.34	0.4224	1
Rv3312c	-	hypothetical protein	20	19	29747.3	23571.3	-6175.9	-0.34	0.4225	1
Rv1583c	-	prophage PhiRv1 protein	5	4	3569.7	2277.3	-1292.4	-0.65	0.4228	1
Rv3093c	-	oxidoreductase	17	14	10016.9	7473.6	-2543.4	-0.42	0.4232	1
Rv0278c	-	PE-PGRS family protein PE_PGRS3	26	22	18898.8	14471.8	-4427	-0.39	0.4242	1
Rv0830	-	s-adenosylmethionine-dependent methyltransferase	21	20	29379.5	34108	4728.5	0.22	0.4243	1
Rv0765c	-	oxidoreductase	12	10	6211.3	8359.1	2147.9	0.43	0.4245	1
Rv0078A	-	hypothetical protein	10	8	8472.9	5868.6	-2604.3	-0.53	0.4249	1
Rv0237	-	lipoprotein LpqI	13	8	3065.7	4984	1918.3	0.7	0.4251	1
Rv0457c	-	prolyl oligopeptidase	38	27	29217.7	22581.9	-6635.8	-0.37	0.4258	1
Rv1255c	-	transcriptional regulator	10	9	6596.7	5064.1	-1532.6	-0.38	0.4261	1
Rv1800	-	PPE family protein PPE28	40	36	72900	63076.8	-9823.1	-0.21	0.4262	1
Rv2671	-	bifunctional enzyme riboflavin biosynthesis protein RibD	13	12	15180.3	11779.6	-3400.7	-0.37	0.4265	1
Rv1877	-	drug:H+ antiporter-2 (14 Spanner) (DHA2) family drug resistance MFS transporter	34	33	52195.1	57086.3	4891.2	0.13	0.4268	1
Rv2656c	-	prophage PhiRv2 protein	5	5	7422.1	5850.8	-1571.2	-0.34	0.4268	1
Rv0083	-	oxidoreductase	23	22	18744.5	23007.6	4263.1	0.3	0.4271	1
Rv0102	-	membrane protein	42	8	8	5.3	-2.8	-0.61	0.4273	1
Rv0989c	-	polyprenyl-diphosphate synthase GrcC2	18	15	19720.8	23778.2	4057.4	0.27	0.4278	1
Rv1498A	-	hypothetical protein	3	3	8127.2	6336	-1791.2	-0.36	0.4279	1
Rv1397c	-	toxin VapC10	6	4	2068.9	2708.9	640.1	0.39	0.4285	1
Rv3911	-	sigma-70 family RNA polymerase sigma factor SigM	10	9	7548.8	5873.2	-1675.6	-0.36	0.4285	1
Rv0059	-	hypothetical protein	19	17	33953.2	39711.4	5758.2	0.23	0.4287	1
Rv0364	-	membrane-associated protein	13	5	1270.7	333.5	-937.2	-1.93	0.4287	1
Rv1649	-	phenylalanyl-tRNA synthetase alpha chain PheS	13	7	3	5.1	2.1	0.76	0.429	1
Rv1091	-	PE-PGRS family protein PE_PGRS22	27	21	22275	17919.9	-4355.2	-0.31	0.4292	1
Rv2002	-	3-alpha-(or 20-beta)-hydroxysteroid dehydrogenase FabG3	11	10	11806.7	9765.5	-2041.2	-0.27	0.4297	1
Rv0892	-	monooxygenase	43	32	11668.8	14072.6	2403.8	0.27	0.4299	1
Rv2180c	-	integral membrane protein	12	12	11256.7	13577.1	2320.4	0.27	0.4299	1
Rv1185c	-	fatty-acid-AMP ligase FadD21	32	24	22586.6	19221.1	-3365.5	-0.23	0.43	1
Rv2042c	-	hypothetical protein	15	13	15957.3	11556.8	-4400.5	-0.47	0.4302	1
Rv3867	-	ESX-1 secretion-associated protein EspH	8	8	13060.3	10031.1	-3029.2	-0.38	0.4303	1
Rv2530A	-	antitoxin VapB39	5	5	3545	2560	-985	-0.47	0.4308	1
Rv0049	-	hypothetical protein	8	8	4629.8	6718.4	2088.5	0.54	0.4309	1
Rv2828c	-	hypothetical protein	5	4	705.9	312.7	-393.2	-1.17	0.431	1
Rv2309Xc	-	hypothetical protein	7	6	3895	2168.2	-1726.9	-0.85	0.4312	1
Rv2395A	-	acid and phagosome regulated protein A AprA	2	2	3001.3	1403.9	-1597.4	-1.1	0.4313	1
Rv1677	-	lipoprotein DsbF	12	8	3659.5	4966.4	1307	0.44	0.4314	1
Rv0324	-	transcriptional regulator ArsR-family	12	9	260.9	513.2	252.3	0.98	0.4319	1
Rv3406	-	taurine dioxygenase	20	19	18035.3	22115	4079.6	0.29	0.4319	1
Rv1257c	-	glycolate oxidase subunit GlcD	16	11	9553.7	7728.5	-1825.2	-0.31	0.432	1
Rv2541	-	alanine rich protein	4	3	4079.2	2222.9	-1856.4	-0.88	0.4323	1
Rv2057c	-	50S ribosomal protein L33 RpmG1	4	4	8421.7	12207.5	3785.8	0.54	0.4328	1
Rv2208	-	cobalamin 5'-phosphate synthase CobS	10	10	6314.2	7865.9	1551.7	0.32	0.433	1
Rv3043c	-	cytochrome C oxidase polypeptide I CtaD	26	11	26.6	76.6	50	1.53	0.4335	1
Rv3753c	-	hypothetical protein	7	6	10452.2	6909.6	-3542.6	-0.6	0.4337	1
Rv2550c	-	antitoxin VapB20	9	4	1167.3	1738.6	571.3	0.57	0.4342	1
Rv3395c	-	hypothetical protein	8	6	2792.1	3751	958.9	0.43	0.4342	1
Rv0261c	-	integral membrane nitrite extrusion protein NarK3	25	18	17493.4	13939.2	-3554.2	-0.33	0.435	1
Rv2836c	-	DNA repair protein RecO	24	21	8468.4	10652.7	2184.3	0.33	0.4351	1
Rv0516c	-	anti-anti-sigma factor	9	9	14236.1	10354.7	-3881.4	-0.46	0.4359	1
Rv1774	-	oxidoreductase	30	26	24786.6	31084.6	6298	0.33	0.4361	1
Rv1506c	-	hypothetical protein	20	10	5586.5	4200.7	-1385.8	-0.41	0.4364	1
Rv0649	-	malonyl CoA-acyl carrier protein transacylase FabD2	4	4	1410.1	2551.9	1141.7	0.86	0.4367	1
Rv3051c	-	ribonucleoside-diphosphate reductase NrdE	55	9	6	14.7	8.7	1.3	0.4367	1
Rv2771c	-	hypothetical protein	8	7	18334	13788.9	-4545.1	-0.41	0.4368	1
Rv3563	-	acyl-CoA dehydrogenase FadE32	14	12	8981	11178.5	2197.5	0.32	0.4371	1
Rv0365c	-	hypothetical protein	20	16	29845.9	24002.2	-5843.6	-0.31	0.4372	1
Rv1563c	-	maltooligosyltrehalose synthase TreY	36	22	4150.6	3101	-1049.7	-0.42	0.4372	1
Rv1140	-	membrane protein	11	7	2531	4255.8	1724.8	0.75	0.4373	1
Rv1962A	-	antitoxin VapB35	4	2	545.6	915	369.4	0.75	0.4373	1
Rv2176	-	transmembrane serine/threonine-protein kinase L PknL	24	20	10814.2	13001.7	2187.5	0.27	0.4373	1
Rv1221	-	RNA polymerase sigma factor SigE	18	6	3918.6	1427.8	-2490.8	-1.46	0.4379	1
Rv1944c	-	hypothetical protein	8	7	14402	10657	-3745	-0.43	0.4379	1
Rv2019	-	hypothetical protein	7	7	19275.7	15669.5	-3606.2	-0.3	0.4389	1
Rv3297	-	endonuclease VIII Nei	10	9	8063.4	5971.5	-2091.9	-0.43	0.4389	1
Rv1496	-	LAO/AO transporter ATPase	10	10	10220.6	6824.2	-3396.4	-0.58	0.4393	1
Rv0258c	-	hypothetical protein	8	6	1928.6	3590.6	1662	0.9	0.4396	1
Rv3488	-	hypothetical protein	9	6	466.1	719	252.9	0.63	0.4396	1
Rv1442	-	biotin sulfoxide reductase BisC	38	34	31689.7	36448.6	4758.9	0.2	0.4397	1
Rv0841	-	transmembrane protein	3	2	942.9	1272.2	329.3	0.43	0.4398	1
Rv3884c	-	ESX-2 secretion system protein EccA2	34	30	18991.3	22221.4	3230	0.23	0.4399	1
Rv1066	-	hypothetical protein	5	5	1133.5	689.2	-444.3	-0.72	0.4403	1
Rv0480c	-	hydrolase	16	12	20095.5	16297.3	-3798.3	-0.3	0.4406	1
Rv0654	-	oxidoreductase	27	27	69864.8	56630.2	-13234.7	-0.3	0.4408	1
Rv3431c	-	transposase	10	8	6860.1	9683.9	2823.8	0.5	0.4408	1
Rv0181c	-	hypothetical protein	16	13	92506.5	51174.1	-41332.3	-0.85	0.4409	1
Rv1759c	-	PE-PGRS family protein Wag22	26	21	29100	19713.4	-9386.6	-0.56	0.4409	1
Rv2871	-	antitoxin VapB43	7	4	5593.5	2733.6	-2859.9	-1.03	0.4411	1
Rv0604	-	lipoprotein LpqO	7	6	10276.6	7469.8	-2806.7	-0.46	0.4415	1
Rv0456B	-	antitoxin MazE1	13	13	14028.6	16817.1	2788.5	0.26	0.4417	1
Rv0601c	-	two-component system sensor histidine kinase	4	3	5027.4	3290.8	-1736.6	-0.61	0.4417	1
Rv1147	-	hypothetical protein	11	9	25046.6	17887.1	-7159.5	-0.49	0.4417	1
Rv3008	-	hypothetical protein	19	14	34375.8	28238.7	-6137	-0.28	0.4422	1
Rv3549c	-	oxidoreductase	13	9	2827	3795.9	968.9	0.43	0.4423	1
Rv0486	-	glycosyltransferase MshA	13	5	1587.5	545.9	-1041.6	-1.54	0.4425	1
Rv3450c	-	ESX-4 secretion system protein EccB4	16	13	25047.6	19466.9	-5580.6	-0.36	0.4429	1
Rv3212	-	alanine and valine rich protein	21	7	298.1	1018	719.9	1.77	0.4434	1
Rv1260	-	oxidoreductase	28	20	8229.7	10843.3	2613.6	0.4	0.4436	1
Rv3525c	-	siderophore-binding protein	16	15	24160.4	18781.9	-5378.6	-0.36	0.4439	1
Rv3612c	-	hypothetical protein	3	3	2466.1	1797	-669.1	-0.46	0.4442	1
Rv0253	-	nitrite reductase [NAD(P)H] small subunit NirD	7	6	8705.9	6653.2	-2052.7	-0.39	0.4447	1
Rv1279	-	dehydrogenase FAD flavoprotein gmc oxidoreductase	30	26	39555.5	32780.2	-6775.2	-0.27	0.4448	1
Rv2682c	-	1-deoxy-D-xylulose-5-phosphate synthase Dxs1	25	9	7	4.3	-2.7	-0.69	0.445	1
Rv2538c	-	3-dehydroquinate synthase AroB	10	2	2	0	-2	0.57	0.4451	1
Rv0874c	-	hypothetical protein	9	9	23741.3	17410.8	-6330.5	-0.45	0.4453	1
Rv0060	-	hypothetical protein	24	6	2831.5	4875.3	2043.8	0.78	0.4458	1
Rv0104	-	hypothetical protein	27	22	32692.2	39054	6361.8	0.26	0.4459	1
Rv1195	-	PE family protein PE13	6	6	13761.5	9993.1	-3768.4	-0.46	0.4461	1
Rv3286c	-	RNA polymerase sigma factor SigF	12	10	6252.7	4515.8	-1736.9	-0.47	0.4463	1
Rv2460c	-	ATP-dependent Clp protease proteolytic subunit 2 ClpP2	10	2	2	0	-2	0.62	0.4468	1
Rv2601	-	spermidine synthase SpeE	26	23	35397.9	30790.9	-4606.9	-0.2	0.447	1
Rv1118c	-	hypothetical protein	12	11	22837.6	17532.8	-5304.8	-0.38	0.4476	1
Rv0703	-	50S ribosomal protein L23 RplW	5	2	2	0	-2	0.6	0.4483	1
Rv2795c	-	hypothetical protein	17	14	2908.8	1784.6	-1124.2	-0.7	0.4484	1
Rv3822	-	membrane-associated acyltransferase	35	26	39436	33748.9	-5687.1	-0.22	0.4484	1
Rv3490	-	trehalose-6P synthase	31	7	1362.3	652.9	-709.4	-1.06	0.4488	1
Rv0620	-	galactokinase GalK	9	8	3339.1	2094.4	-1244.7	-0.67	0.4493	1
Rv1790	-	PPE family protein PPE27	21	19	32996.4	27191.6	-5804.8	-0.28	0.4496	1
Rv3748	-	hypothetical protein	8	7	10946.2	8979.3	-1966.9	-0.29	0.4496	1
Rv3858c	-	NADH-dependent glutamate synthase small subunit GltD	12	2	2	0	-2	0.62	0.4496	1
Rv3403c	-	hypothetical protein	26	25	49313.7	42120.5	-7193.2	-0.23	0.4501	1
Rv0716	-	50S ribosomal protein L5 RplE	4	2	2	0	-2	0.62	0.4504	1
Rv1636	-	iron-regulated universal stress protein family protein	10	2	2	0	-2	0.6	0.4504	1
Rv2092c	-	ATP dependent DNA helicase HelY	40	36	90448.6	77969	-12479.5	-0.21	0.4504	1
Rv2397c	-	sulfate-transport ABC transporter ATP-binding protein CysA1	15	5	59.6	203.3	143.7	1.77	0.4508	1
Rv2757c	-	toxin VapC21	8	6	1747.8	2633.7	885.9	0.59	0.451	1
Rv3067	-	hypothetical protein	8	8	20669.8	15584	-5085.8	-0.41	0.451	1
Rv2269c	-	hypothetical protein	11	7	1795.3	2675.3	879.9	0.58	0.4513	1
Rv2766c	-	oxidoreductase	6	6	9764.3	11664.6	1900.3	0.26	0.4513	1
Rv3815c	-	1-acylglycerol-3-phosphate O-acyltransferase	13	13	16067	20812	4745	0.37	0.4515	1
Rv1390	-	DNA-directed RNA polymerase omega chain RpoZ	7	2	2	0	-2	0.56	0.4517	1
Rv1076	-	lipase LipU	22	11	10972.1	14524	3551.9	0.4	0.4522	1
Rv1721c	-	antitoxin VapB12	3	2	1534.8	2251.4	716.5	0.55	0.4522	1
Rv1555	-	fumarate reductase FrdD	5	5	9307.7	7390.2	-1917.4	-0.33	0.4528	1
Rv2373c	-	chaperone DnaJ2	10	2	2	0	-2	0.6	0.4528	1
Rv1671	-	membrane protein	16	9	11388.6	9106.4	-2282.2	-0.32	0.4533	1
Rv1508c	-	membrane protein	43	41	90870.6	80191.1	-10679.5	-0.18	0.4535	1
Rv0928	-	periplasmic phosphate-binding lipoprotein PstS3	22	20	256949	210819	-46130	-0.29	0.4537	1
Rv0266c	-	5-oxoprolinase OplA	42	37	59251.1	51826.7	-7424.3	-0.19	0.4539	1
Rv0285	-	PE family protein PE5	5	2	3	0	-3	0.02	0.4539	1
Rv3342	-	methyltransferase	9	7	12540	8281.7	-4258.3	-0.6	0.454	1
Rv1439c	-	hypothetical protein	7	7	9735.2	7851.6	-1883.7	-0.31	0.4542	1
Rv1523	-	methyltransferase	21	18	22706.9	26500.1	3793.1	0.22	0.4543	1
Rv2582	-	peptidyl-prolyl cis-trans isomerase B PpiB	19	8	1838.6	724.3	-1114.3	-1.34	0.4544	1
Rv3393	-	nucleoside hydrolase LunH	11	10	26446.2	19653.1	-6793.1	-0.43	0.4559	1
Rv2184c	-	arsenite-transporting ATPase	18	14	22518.8	18053.2	-4465.6	-0.32	0.456	1
Rv1684	-	hypothetical protein	5	2	2	0	-2	0.57	0.4561	1
Rv0656c	-	toxin VapC6	4	4	23227.9	8706.4	-14521.5	-1.42	0.4562	1
Rv1372	-	hypothetical protein	18	11	9346.9	6125.1	-3221.9	-0.61	0.4563	1
Rv2965c	-	phosphopantetheine adenylyltransferase KdtB	4	2	1	2.4	1.4	1.24	0.4564	1
Rv2508c	-	UMF1 family MFS transporter	17	16	19025.6	15057.4	-3968.2	-0.34	0.4566	1
Rv3797	-	acyl-CoA dehydrogenase FadE35	21	20	15395.7	12844	-2551.7	-0.26	0.4568	1
Rv2566	-	hypothetical protein	52	48	37221.8	41939.4	4717.6	0.17	0.4577	1
Rv3052c	-	protein NrdI	14	2	1	2.5	1.5	1.3	0.4577	1
Rv3053c	-	NRDEF glutaredoxin electron transport component NrdH	9	2	2	0	-2	0.62	0.4579	1
Rv2809	-	hypothetical protein	8	7	8282.9	6342.4	-1940.5	-0.39	0.458	1
Rv1025	-	hypothetical protein	7	2	0	2.6	2.6	-0.19	0.4581	1
Rv1625c	-	adenylyl cyclase Cya	32	28	57524.2	49128.1	-8396.1	-0.23	0.4582	1
Rv1073	-	hypothetical protein	19	17	16996.4	14301.9	-2694.5	-0.25	0.4583	1
Rv0440	-	chaperonin 2 GroEL2	13	2	2	0	-2	0.59	0.4584	1
Rv2401A	-	membrane protein	3	2	7772.4	11733.4	3961.1	0.59	0.4585	1
Rv2149c	-	hypothetical protein	7	6	4744.3	6284.8	1540.5	0.41	0.4588	1
Rv3303c	-	NAD(P)H quinone reductase LpdA	22	16	2484.9	3596	1111.1	0.53	0.4589	1
Rv3099c	-	hypothetical protein	6	5	8040.2	9557	1516.8	0.25	0.4592	1
Rv3430c	-	transposase	18	18	28260.2	33484.9	5224.7	0.24	0.4594	1
Rv0720	-	50S ribosomal protein L18 RplR	4	2	2	0	-2	0.62	0.4596	1
Rv1274	-	lipoprotein LprB	4	2	2	0	-2	0.58	0.4597	1
Rv0301	-	toxin VapC2	7	7	19298.6	15814.7	-3483.9	-0.29	0.4603	1
Rv0398c	-	secreted protein	5	4	1426.9	2013.5	586.6	0.5	0.4611	1
Rv0860	-	fatty oxidation protein FadB	27	10	10	22.6	12.6	1.18	0.4613	1
Rv1950c	-	hypothetical protein	6	6	8803.4	11303.9	2500.5	0.36	0.4613	1
Rv2919c	-	nitrogen regulatory protein P-II GlnB	5	3	3404.2	1933.9	-1470.2	-0.82	0.4614	1
Rv0645c	-	methoxy mycolic acid synthase 1 MmaA1	20	20	99853.7	110136	10282	0.14	0.4616	1
Rv1878	-	glutamine synthetase GlnA3	28	25	23596.8	28343.9	4747	0.26	0.4616	1
Rv1404	-	transcriptional regulator	9	6	3187.4	1727	-1460.4	-0.88	0.4618	1
Rv3013	-	hypothetical protein	7	6	14310.8	10452.1	-3858.7	-0.45	0.4618	1
Rv1127c	-	pyruvate, phosphate dikinase PpdK	19	13	3484.4	4671.5	1187.1	0.42	0.462	1
Rv2908c	-	hypothetical protein	6	2	2	0	-2	0.56	0.462	1
Rv2590	-	fatty-acid-CoA ligase FadD9	62	58	114554	103572	-10981.9	-0.15	0.4626	1
Rv0415	-	glycine oxidase ThiO	12	2	2	0	-2	0.62	0.4628	1
Rv2063A	-	toxin MazF7	4	4	18102.1	12570.6	-5531.5	-0.53	0.463	1
Rv1233c	-	hypothetical protein	18	10	12701.1	9093.9	-3607.2	-0.48	0.4631	1
Rv1576c	-	prophage PhiRv1 protein	9	4	762.2	1288.5	526.3	0.76	0.4631	1
Rv3239c	-	drug:H+ antiporter-2 (14 Spanner) (DHA2) family drug resistance MFS transporter	56	53	101044	90760.1	-10283.6	-0.15	0.4632	1
Rv0208c	-	methyltransferase	12	5	506.5	177.4	-329	-1.51	0.4633	1
Rv0412c	-	membrane protein	23	9	5	7.7	2.7	0.63	0.4633	1
Rv1068c	-	PE-PGRS family protein PE_PGRS20	13	10	2865.2	3640	774.7	0.35	0.4633	1
Rv1753c	-	PPE family protein PPE24	66	40	27302.4	21184.6	-6117.8	-0.37	0.4636	1
Rv1381	-	dihydroorotase PyrC	11	2	2.9	0	-2.9	0.03	0.4637	1
Rv1036c	-	transposase	5	4	1886.2	2516.2	630.1	0.42	0.4643	1
Rv1659	-	argininosuccinate lyase ArgH	8	2	2	0	-2	0.59	0.4643	1
Rv0429c	-	polypeptide deformylase Def	9	2	2	0	-2	0.59	0.4644	1
Rv1145	-	transmembrane transporter MmpL13a	11	9	6156	8113.4	1957.4	0.4	0.4644	1
Rv1183	-	transmembrane transporter MmpL10	53	37	131570	117602	-13967.8	-0.16	0.4652	1
Rv2443	-	C4-dicarboxylate-transport transmembrane protein DctA	22	17	34142.3	28809.5	-5332.8	-0.25	0.4652	1
Rv1406	-	methionyl-tRNA formyltransferase Fmt	9	4	3.9	1.6	-2.3	-1.31	0.4655	1
Rv2315c	-	protein TldD	33	30	18068.8	23520.7	5451.8	0.38	0.4655	1
Rv3234c	-	triacylglycerol synthase Tgs3	18	16	29739.5	23801	-5938.5	-0.32	0.4656	1
Rv0602c	-	two-component system transcriptional regulator TcrA	11	10	10021.2	7050.6	-2970.7	-0.51	0.4658	1
Rv3327	-	transposase	24	20	15881.6	19907.9	4026.3	0.33	0.4658	1
Rv1039c	-	PPE family protein PPE15	24	22	34589	40126.8	5537.7	0.21	0.4659	1
Rv0939	-	bifunctional enzyme 2-hydroxyhepta-2,4-diene-1,7-dioate isomerase	32	24	19719.5	16625.3	-3094.1	-0.25	0.4661	1
Rv1385	-	orotidine 5'-phosphate decarboxylase PyrF	7	3	228.2	449.6	221.4	0.98	0.4664	1
Rv3503c	-	ferredoxin FdxD	7	7	6678.8	9176.8	2498	0.46	0.4664	1
Rv3510c	-	hypothetical protein	17	15	15961.6	19059.2	3097.6	0.26	0.4665	1
Rv2234	-	phosphotyrosine protein phosphatase PtpA	7	7	11024.3	7853.7	-3170.6	-0.49	0.4666	1
Rv1483	-	3-oxoacyl-[acyl-carrier-protein] reductase FabG	13	3	1	2.9	1.9	1.51	0.4667	1
Rv0867c	-	resuscitation-promoting factor RpfA	12	12	22810.1	29789.9	6979.8	0.39	0.4668	1
Rv0396	-	hypothetical protein	6	5	2929.1	4267.5	1338.5	0.54	0.4669	1
Rv2228c	-	multifunctional RNASE H/alpha-ribazole phosphatase/acid phosphatase	17	8	418.3	55.5	-362.8	-2.91	0.4671	1
Rv3742c	-	oxidoreductase	7	6	17322.9	14568.8	-2754.1	-0.25	0.4673	1
Rv1739c	-	sulfate-transport ABC transporter transmembrane protein	41	34	33936.4	29262.3	-4674.1	-0.21	0.4675	1
Rv3083	-	oxidoreductase	26	24	26045.7	30425.1	4379.4	0.22	0.4682	1
Rv1059	-	dihydrodipicolinate reductase	10	6	1747.8	2376.2	628.3	0.44	0.4685	1
Rv2317	-	sugar-transport ABC transporter integral membrane protein UspB	14	9	6958.7	5143	-1815.6	-0.44	0.4686	1
Rv2713	-	soluble pyridine nucleotide transhydrogenase SthA	22	22	41577.5	47405.4	5827.9	0.19	0.4693	1
Rv2794c	-	phosphopantetheinyl transferase PptT	8	4	2	5.6	3.6	1.48	0.4694	1
Rv3398c	-	e,e-farnesyl diphosphate synthase	15	12	5033.2	3301.8	-1731.4	-0.61	0.47	1
Rv0137c	-	peptide methionine sulfoxide reductase MsrA	11	8	8183.5	5964.4	-2219.1	-0.46	0.4702	1
Rv1470	-	thioredoxin TrxA	5	5	6126.8	4283.1	-1843.7	-0.52	0.4707	1
Rv0450c	-	transmembrane transporter MmpL4	84	56	17386.6	12903	-4483.6	-0.43	0.4712	1
Rv3920c	-	spoIIIJ-associated protein	4	3	4	31.5	27.4	2.97	0.4713	1
Rv3445c	-	ESAT-6 like protein EsxU	3	2	3661.5	5558.7	1897.3	0.6	0.4714	1
Rv1886c	-	secreted antigen 85-B FbpB	25	24	52087.8	59498.1	7410.2	0.19	0.4716	1
Rv0909	-	hypothetical protein	3	3	234.5	87	-147.5	-1.43	0.4717	1
Rv3615c	-	ESX-1 secretion-associated protein EspC	8	5	2786.6	1989.1	-797.5	-0.49	0.4719	1
Rv1593c	-	hypothetical protein	12	11	9198.3	11939.4	2741	0.38	0.472	1
Rv1345	-	fatty acyl-AMP ligase MbtM	23	21	2610.8	3470.7	859.9	0.41	0.4725	1
Rv0028	-	hypothetical protein	5	3	5621.8	4283.5	-1338.3	-0.39	0.4729	1
Rv0321	-	deoxycytidine triphosphate deaminase Dcd	6	5	9393.4	7593.3	-1800.1	-0.31	0.4729	1
Rv1165	-	GTP-binding protein TypA/BipA	16	14	16141.6	13476.1	-2665.4	-0.26	0.4729	1
Rv1424c	-	membrane protein	19	15	12595.7	15830.4	3234.7	0.33	0.4732	1
Rv3469c	-	4-hydroxy-2-oxovalerate aldolase MhpE	14	10	14934.3	11813.3	-3121	-0.34	0.4734	1
Rv0675	-	enoyl-CoA hydratase EchA5	5	5	880.4	477.9	-402.6	-0.88	0.4739	1
Rv0334	-	glucose-1-phosphate thymidylyltransferase RmlA	19	5	5	2.5	-2.5	-1	0.4741	1
Rv1352	-	hypothetical protein	6	6	9408.5	6793.8	-2614.7	-0.47	0.4741	1
Rv0685	-	iron-regulated elongation factor TU Tuf	12	5	95.3	262.1	166.8	1.46	0.4743	1
Rv3641c	-	cell filamentation protein Fic	12	10	15667.4	13177.8	-2489.6	-0.25	0.4743	1
Rv2025c	-	cation diffusion facilitator family transporter	10	9	26072	12664.2	-13407.8	-1.04	0.4744	1
Rv2749	-	hypothetical protein	3	3	4077.4	2834.9	-1242.5	-0.52	0.4744	1
Rv2311	-	hypothetical protein	7	7	24011.5	20575.7	-3435.8	-0.22	0.4745	1
Rv3834c	-	seryl-tRNA synthetase SerS	22	11	271.7	850.1	578.4	1.65	0.4745	1
Rv3085	-	oxidoreductase	4	4	1345.4	966.3	-379.1	-0.48	0.4747	1
Rv3678A	-	hypothetical protein	5	5	2211.7	1357.4	-854.3	-0.7	0.4747	1
Rv1386	-	PE family protein PE15	6	6	12662.8	17671.1	5008.3	0.48	0.475	1
Rv0568	-	cytochrome P450 135B1 Cyp135B1	12	11	12389.3	10046	-2343.3	-0.3	0.4753	1
Rv3019c	-	secreted ESAT-6 like protein EsxR	9	7	14856.5	11773.6	-3082.9	-0.34	0.4754	1
Rv0413	-	mutator protein MutT3	8	7	20453.8	27832.4	7378.5	0.44	0.4755	1
Rv0853c	-	pyruvate or indole-3-pyruvate decarboxylase Pdc	26	24	39751.5	32060.7	-7690.8	-0.31	0.4758	1
Rv1090	-	cellulase CelA2b	8	8	20541.7	16925.5	-3616.1	-0.28	0.4758	1
Rv3296	-	ATP-dependent helicase Lhr	56	48	64486.5	56383.3	-8103.2	-0.19	0.4759	1
Rv1997	-	metal cation transporter P-type ATPase CtpF	29	26	36699.7	30846.2	-5853.5	-0.25	0.4763	1
Rv3269	-	hypothetical protein	5	3	3	15.5	12.5	2.37	0.4763	1
Rv3736	-	transcriptional regulator	19	18	31515.2	24658	-6857.2	-0.35	0.4765	1
Rv3657c	-	alanine rich membrane protein	4	4	1721	704.3	-1016.7	-1.29	0.4766	1
Rv0965c	-	hypothetical protein	6	5	2723.4	3552.4	829.1	0.38	0.4772	1
Rv1212c	-	glycosyltransferase GlgA	32	27	111831	81310.4	-30520.4	-0.46	0.4781	1
Rv3007c	-	oxidoreductase	9	9	13933.3	17190	3256.7	0.3	0.4781	1
Rv1000c	-	hypothetical protein	8	7	17328.8	21937.5	4608.7	0.34	0.4784	1
Rv2885c	-	transposase	18	13	14267.3	11568.6	-2698.7	-0.3	0.4785	1
Rv0769	-	3-oxoacyl-[acyl-carrier protein] reductase	17	12	9318.3	7181.5	-2136.9	-0.38	0.4786	1
Rv0680c	-	transmembrane protein	3	3	4006.7	5651.5	1644.7	0.5	0.4792	1
Rv1494	-	antitoxin MazE4	8	5	961.9	1609.6	647.6	0.74	0.4792	1
Rv1917c	-	PPE family protein PPE34	121	87	75485.3	67220.9	-8264.4	-0.17	0.4795	1
Rv3471c	-	hypothetical protein	5	4	6617	4821.4	-1795.6	-0.46	0.4795	1
Rv0259c	-	hypothetical protein	8	7	4713	3101.9	-1611.1	-0.6	0.48	1
Rv3755c	-	hypothetical protein	10	7	4920.3	3385.3	-1535	-0.54	0.4801	1
Rv2574	-	hypothetical protein	8	8	7686.8	6106.8	-1580	-0.33	0.4802	1
Rv1230c	-	membrane protein	20	16	16891.7	19503.5	2611.8	0.21	0.4804	1
Rv0437c	-	phosphatidylserine decarboxylase Psd	8	5	914.6	31	-883.6	-4.88	0.4808	1
Rv2562	-	hypothetical protein	9	8	10870.1	13311.5	2441.4	0.29	0.4808	1
Rv3644c	-	DNA polymerase III delta subunit	20	4	2330.8	4618.5	2287.7	0.99	0.481	1
Rv3336c	-	tryptophanyl-tRNA synthetase TrpS	20	6	10050.9	7244.9	-2806	-0.47	0.4814	1
Rv0404	-	fatty-acid-AMP ligase FadD30	87	39	17944.6	13892.8	-4051.7	-0.37	0.4816	1
Rv0953c	-	oxidoreductase	12	11	6312	7737.6	1425.6	0.29	0.4818	1
Rv1313c	-	transposase	16	10	2117.7	1493.3	-624.5	-0.5	0.482	1
Rv0626	-	antitoxin VapB5	4	2	970.5	1252.4	281.9	0.37	0.4829	1
Rv1777	-	cytochrome P450 144 Cyp144	28	23	30125.4	24405.7	-5719.7	-0.3	0.4831	1
Rv3288c	-	protein UsfY	11	11	18805.2	14579.2	-4226	-0.37	0.4831	1
Rv3284	-	cysteine desulfuration protein SufE	6	4	219.4	20.4	-199	-3.43	0.4832	1
Rv1979c	-	permease	38	34	69036.6	78856.3	9819.7	0.19	0.4835	1
Rv0671	-	lipoprotein LpqP	13	13	15592.1	12213.3	-3378.8	-0.35	0.4836	1
Rv2970c	-	lipase/esterase LipN	16	15	35704.8	29379.8	-6325	-0.28	0.4836	1
Rv3314c	-	thymidine phosphorylase DeoA	10	10	12107.4	8742.2	-3365.2	-0.47	0.4837	1
Rv3814c	-	1-acylglycerol-3-phosphate O-acyltransferase	13	11	17509	24384.4	6875.4	0.48	0.484	1
Rv2357c	-	glycyl-tRNA synthetase GlyS	31	8	32	19.4	-12.6	-0.72	0.4841	1
Rv0219	-	transmembrane protein	11	9	8152.1	15402.6	7250.6	0.92	0.4844	1
Rv0186Ac	-	metallothionein MymT	4	4	2127	2850.4	723.4	0.42	0.4859	1
Rv1509	-	hypothetical protein	21	14	15460.9	11624.2	-3836.7	-0.41	0.4859	1
Rv0077c	-	oxidoreductase	15	13	10901.7	8221.4	-2680.3	-0.41	0.4868	1
Rv1516c	-	sugar transferase	11	10	7819.4	5908.2	-1911.2	-0.4	0.487	1
Rv1613	-	tryptophan synthase alpha subunit TrpA	19	5	5	2.4	-2.6	-1.07	0.4872	1
Rv2246	-	3-oxoacyl-[acyl-carrier-protein] synthase 2 KasB	19	7	4	25.8	21.8	2.68	0.4872	1
Rv3901c	-	membrane protein	12	11	28655.8	33470.8	4815.1	0.22	0.4874	1
Rv2521	-	bacterioferritin comigratory protein Bcp	11	9	10813.3	14118.7	3305.4	0.38	0.4876	1
Rv3457c	-	DNA-directed RNA polymerase alpha chain RpoA	16	6	1409.8	894.3	-515.5	-0.66	0.4877	1
Rv0244c	-	acyl-CoA dehydrogenase FadE5	23	17	86.7	121	34.3	0.48	0.4878	1
Rv3141	-	NADPH quinone oxidoreductase FadB4	16	11	8580	13430.4	4850.5	0.65	0.4879	1
Rv2637	-	transmembrane protein	10	6	6237.5	8685.7	2448.2	0.48	0.4885	1
Rv0530Ac	-	hypothetical protein	3	3	2439.1	1357.4	-1081.7	-0.85	0.4886	1
Rv2006	-	trehalose-6-phosphate phosphatase OtsB1	82	58	32477.4	35808.6	3331.2	0.14	0.489	1
Rv2839c	-	translation initiation factor IF-2 InfB	31	11	11	25.1	14.1	1.19	0.4892	1
Rv1501	-	hypothetical protein	34	21	15763.1	12591.9	-3171.2	-0.32	0.4893	1
Rv3238c	-	integral membrane protein	21	21	43221.5	36408.6	-6812.9	-0.25	0.4894	1
Rv1754c	-	hypothetical protein	40	36	34500.1	39297	4796.9	0.19	0.4896	1
Rv0556	-	transmembrane protein	13	5	2.9	5.6	2.7	0.94	0.4905	1
Rv3402c	-	hypothetical protein	30	25	37781.9	44546	6764	0.24	0.4908	1
Rv1038c	-	ESAT-6 like protein EsxJ	3	3	2181.3	3122.4	941	0.52	0.4911	1
Rv3803c	-	secreted MPT51/MPB51 antigen protein FbpD	19	19	16021.1	13177.6	-2843.5	-0.28	0.4912	1
Rv2647	-	hypothetical protein	6	4	950.2	1466.7	516.5	0.63	0.4913	1
Rv0991c	-	serine rich protein	3	3	19046	14660.4	-4385.7	-0.38	0.4915	1
Rv2835c	-	sn-glycerol-3-phosphate transport ABC transporter integral membrane protein UgpA	16	10	8331.4	10768.9	2437.6	0.37	0.4915	1
Rv1016c	-	lipoprotein LpqT	6	5	10454.4	8036.6	-2417.8	-0.38	0.4925	1
Rv3283	-	thiosulfate sulfurtransferase SseA	19	6	5	2.5	-2.5	-1.01	0.4931	1
Rv2754c	-	thymidylate synthase ThyX	9	3	4	6.8	2.8	0.76	0.4934	1
Rv3816c	-	1-acylglycerol-3-phosphate O-acyltransferase	13	11	10547.7	7532	-3015.7	-0.49	0.4934	1
Rv1818c	-	PE-PGRS family protein PE_PGRS33	15	12	11900.2	9910.9	-1989.3	-0.26	0.4937	1
Rv2504c	-	succinyl-CoA:3-ketoacid-CoA transferase alpha subunit ScoA	13	10	13225.5	16578.4	3352.9	0.33	0.4938	1
Rv2659c	-	prophage PhiRv2 integrase	21	20	37293.5	30197.7	-7095.8	-0.3	0.4938	1
Rv3914	-	thioredoxin TrxC	7	3	193.9	359.1	165.2	0.89	0.494	1
Rv1156	-	hypothetical protein	12	12	7595.4	11073.4	3478	0.54	0.4943	1
Rv2926c	-	hypothetical protein	6	4	678.2	1212.9	534.6	0.84	0.4947	1
Rv0737	-	transcriptional regulator	5	3	1012	1418	406	0.49	0.4952	1
Rv3364c	-	hypothetical protein	3	2	2531.2	1677.6	-853.6	-0.59	0.4954	1
Rv2428	-	alkyl hydroperoxide reductase AhpC	10	8	3343.3	2147.1	-1196.2	-0.64	0.4964	1	*
Rv2183c	-	hypothetical protein	6	5	5700.3	4141.5	-1558.7	-0.46	0.4967	1
Rv0958	-	magnesium chelatase	16	13	18351.4	15624.4	-2726.9	-0.23	0.4968	1
Rv1522c	-	transmembrane transporter MmpL12	53	39	46961.5	42791.9	-4169.6	-0.13	0.4968	1
Rv2298	-	hypothetical protein	17	16	20056.8	23421.7	3364.9	0.22	0.4968	1
Rv1319c	-	adenylate cyclase	28	28	40959.3	34691.8	-6267.5	-0.24	0.4969	1
Rv2814c	-	transposase	23	13	1395.2	1997.4	602.2	0.52	0.4969	1
Rv0495c	-	hypothetical protein	13	7	1704.6	3482.4	1777.8	1.03	0.497	1
Rv1321	-	hypothetical protein	12	11	9880.7	12056.1	2175.4	0.29	0.4972	1
Rv2356c	-	PPE family protein PPE40	31	21	20129.1	25633.5	5504.4	0.35	0.4972	1
Rv1702c	-	hypothetical protein	24	20	30387	25915.7	-4471.3	-0.23	0.4974	1
Rv3456c	-	50S ribosomal protein L17 RplQ	12	4	341.3	1078.8	737.5	1.66	0.4974	1
Rv2737c	-	protein RecA	29	29	2751.9	2189.5	-562.4	-0.33	0.4976	1
Rv0915c	-	PPE family protein PPE14	19	16	27975.8	23539.6	-4436.2	-0.25	0.4979	1
Rv1513	-	FkbM family methyltransferase	7	7	3312.4	4250.5	938.1	0.36	0.4985	1
Rv0894	-	transcriptional regulator LuxR-family	18	10	7264.8	9456.9	2192.1	0.38	0.4989	1
Rv1585c	-	prophage PhiRv1 protein	8	7	2712.7	2007.1	-705.6	-0.43	0.4992	1
Rv1822	-	CDP-diacylglycerol-glycerol-3-phosphate 3-phosphatidyltransferase PgsA2	17	4	1597.7	1089	-508.7	-0.55	0.4992	1
Rv3553	-	oxidoreductase	12	10	9983.5	8126.1	-1857.5	-0.3	0.4994	1
Rv1360	-	oxidoreductase	14	12	30676	24145.5	-6530.5	-0.35	0.4996	1
Rv1333	-	hydrolase	13	9	22516.4	18883.9	-3632.6	-0.25	0.4997	1
Rv2736c	-	regulatory protein RecX	6	5	2155.7	1316.9	-838.8	-0.71	0.5	1
Rv3882c	-	ESX-1 secretion system protein EccE1	22	19	64265.9	54360.4	-9905.4	-0.24	0.5002	1
Rv2482c	-	glycerol-3-phosphate acyltransferase PlsB2	41	31	35984.6	30927.3	-5057.3	-0.22	0.5005	1
Rv0119	-	fatty-acid-CoA ligase FadD7	13	8	349.1	235.5	-113.6	-0.57	0.5007	1
Rv3331	-	sugar-transport ABC transporter integral membrane protein SugI	23	22	5805.1	7076.9	1271.8	0.29	0.5008	1
Rv3439c	-	alanine and proline rich protein	12	10	19275.4	16048.9	-3226.6	-0.26	0.5009	1
Rv1318c	-	adenylate cyclase	18	17	28353.5	35005.9	6652.4	0.3	0.5015	1
Rv0614	-	galactose-1-phosphate uridylyltransferase	14	13	9865.8	11636.9	1771.1	0.24	0.502	1
Rv2332	-	malate dehydrogenase Mez	29	25	24564.8	27492.9	2928	0.16	0.5023	1
Rv2914c	-	transmembrane serine/threonine-protein kinase I PknI	28	24	37448.7	31113.2	-6335.5	-0.27	0.5027	1
Rv1137c	-	hypothetical protein	2	2	1517.7	2381.3	863.6	0.65	0.5033	1
Rv2258c	-	transcriptional regulator	15	13	22393	17430.7	-4962.3	-0.36	0.5035	1
Rv3451	-	cutinase Cut3	18	16	25753.4	20922.3	-4831.1	-0.3	0.504	1
Rv1869c	-	oxidoreductase	26	23	33824.9	38875.4	5050.5	0.2	0.5045	1
Rv3033	-	hypothetical protein	4	3	5095.8	3820.7	-1275.1	-0.42	0.5045	1
Rv3770B	-	transposase	4	3	452.9	1181.8	728.9	1.38	0.5051	1
Rv0277Ac	-	antitoxin	4	3	4592	3307.9	-1284.1	-0.47	0.5052	1
Rv0514	-	transmembrane protein	2	1	3096.8	4174.9	1078.2	0.43	0.5055	1
Rv0229c	-	toxin	7	7	14223.5	10235	-3988.5	-0.47	0.5056	1
Rv3096	-	hypothetical protein	15	14	24572.8	31673.5	7100.7	0.37	0.506	1
Rv0007	-	membrane protein	10	7	1286	818.8	-467.2	-0.65	0.5063	1
Rv3627c	-	d-alanyl-d-alanine carboxypeptidase	13	6	924.1	2183.1	1258.9	1.24	0.5063	1
Rv2125	-	hypothetical protein	11	10	11959	9945.9	-2013.1	-0.27	0.5065	1
Rv2082	-	hypothetical protein	38	34	69123.9	60526.1	-8597.8	-0.19	0.5066	1
Rv2905	-	alanine rich lipoprotein LppW	16	13	24129.5	20132.5	-3996.9	-0.26	0.5068	1
Rv3098B	-	toxin	1	1	630.6	814.2	183.6	0.37	0.5068	1
Rv2860c	-	glutamine synthetase GlnA4	31	25	17885.6	14635.5	-3250.1	-0.29	0.5069	1
Rv2479c	-	transposase	23	15	4729.6	6255	1525.4	0.4	0.5072	1
Rv0026	-	hypothetical protein	14	10	17192.4	14649.8	-2542.6	-0.23	0.5078	1
Rv3853	-	RNase E activity regulator RraA	11	7	6301.3	8398.4	2097.1	0.41	0.5079	1
Rv0254c	-	adenosylcobinamide kinase/adenosylcobinamide-phosphate guanylyltransferase CobU	6	5	10563.9	8584	-1979.8	-0.3	0.508	1
Rv0505c	-	phosphoserine phosphatase SerB1	22	9	2529.8	1850.1	-679.6	-0.45	0.5081	1
Rv2302	-	hypothetical protein	5	5	10410.5	8424.5	-1986	-0.31	0.5082	1
Rv3110	-	pterin-4-alpha-carbinolamine dehydratase MoaB1	9	6	6974.2	4620.9	-2353.3	-0.59	0.5084	1
Rv1733c	-	transmembrane protein	5	5	1583.4	2264.5	681.1	0.52	0.5087	1
Rv3850	-	hypothetical protein	6	6	4008.4	3205.2	-803.2	-0.32	0.5099	1
Rv1489	-	hypothetical protein	7	7	22961.5	18107.7	-4853.7	-0.34	0.5101	1
Rv0452	-	transcriptional regulator	10	8	9714.3	12362.7	2648.4	0.35	0.5102	1
Rv2039c	-	sugar-transport ABC transporter permease	16	13	10947.2	14644.7	3697.5	0.42	0.5103	1
Rv2262c	-	apolipoprotein N-acyltransferase	14	13	21358.5	15579.5	-5779.1	-0.46	0.5108	1
Rv0210	-	hypothetical protein	13	11	15197.7	18278.1	3080.3	0.27	0.511	1
Rv1808	-	PPE family protein PPE32	29	28	70785.6	62702.6	-8083	-0.17	0.511	1
Rv0487	-	hypothetical protein	10	10	6555.4	7665.1	1109.7	0.23	0.5114	1
Rv2142A	-	antitoxin ParD2	3	3	1982.8	1401	-581.8	-0.5	0.5118	1
Rv0131c	-	acyl-CoA dehydrogenase FadE1	18	18	19005.1	15340.3	-3664.9	-0.31	0.5119	1
Rv1766	-	hypothetical protein	3	3	2185.5	1458.1	-727.4	-0.58	0.5121	1
Rv0427c	-	exodeoxyribonuclease III protein XthA	13	11	9350.6	6571	-2779.6	-0.51	0.5123	1
Rv0485	-	transcriptional regulator	23	20	18933	16190.4	-2742.6	-0.23	0.5123	1
Rv1304	-	ATP synthase A chain AtpB	12	4	242.8	527.5	284.7	1.12	0.5124	1
Rv2947c	-	polyketide synthase Pks15	22	21	44841.2	38460.5	-6380.7	-0.22	0.5124	1
Rv0746	-	PE-PGRS family protein PE_PGRS9	16	11	5503.1	4071.9	-1431.2	-0.43	0.5129	1
Rv2238c	-	peroxiredoxin AhpE	4	3	1821.3	1183.4	-638	-0.62	0.513	1
Rv2309c	-	integrase	8	7	11006.9	13434.7	2427.8	0.29	0.513	1
Rv0336	-	13E12 repeat family protein	18	14	7331	9257.4	1926.5	0.34	0.5132	1
Rv3498c	-	MCE-family protein Mce4B	12	8	4922.7	6269.9	1347.2	0.35	0.5133	1
Rv0846c	-	oxidoreductase	31	23	17252.3	20254.8	3002.5	0.23	0.514	1
Rv2586c	-	protein-export membrane protein SecF	19	6	9910.1	6071	-3839	-0.71	0.514	1
Rv2279	-	transposase	23	13	7185.3	4081.6	-3103.6	-0.82	0.5144	1
Rv1369c	-	transposase	23	15	3844.9	4927.7	1082.7	0.36	0.5145	1
Rv0597c	-	ATPase	13	11	9220.4	7412.3	-1808.1	-0.31	0.5149	1
Rv2065	-	precorrin-8X methylmutase CobH	8	7	8621.6	10317.5	1695.8	0.26	0.5151	1
Rv2410c	-	hypothetical protein	11	9	8577.5	6739.6	-1838	-0.35	0.5155	1
Rv0559c	-	secreted protein	7	7	15493.6	11131.1	-4362.6	-0.48	0.5156	1
Rv0397A	-	hypothetical protein	8	7	4152.6	5733.5	1580.9	0.47	0.5158	1
Rv0599c	-	antitoxin VapB27	6	4	2155.8	1221	-934.9	-0.82	0.5159	1
Rv2920c	-	ammonium-transport integral membrane protein Amt	21	15	15084	12004.8	-3079.2	-0.33	0.5174	1
Rv1738	-	hypothetical protein	3	3	2611.3	3832.3	1221	0.55	0.5182	1
Rv2921c	-	cell division protein FtsY	13	6	6	4.1	-1.9	-0.56	0.5186	1
Rv2439c	-	glutamate 5-kinase ProB	11	7	5.9	3.7	-2.2	-0.68	0.5191	1
Rv2475c	-	YbgC/YbaW family acyl-CoA thioester hydrolase	8	6	9852.4	7441.1	-2411.3	-0.4	0.5198	1
Rv3714c	-	hypothetical protein	11	10	20039.3	15789.7	-4249.6	-0.34	0.5201	1
Rv3874	-	ESAT-6-like protein EsxB	7	5	2950.3	3948.6	998.3	0.42	0.5201	1
Rv1529	-	fatty-acid-AMP ligase FadD24	37	28	23969.9	19922.7	-4047.2	-0.27	0.5213	1
Rv1550	-	fatty-acid-CoA ligase FadD11	28	27	50883.2	45166.8	-5716.3	-0.17	0.5213	1
Rv0196	-	transcriptional regulator	7	7	5664	4499.4	-1164.6	-0.33	0.5215	1
Rv0721	-	30S ribosomal protein S5 RpsE	13	6	9	5.5	-3.5	-0.71	0.5216	1
Rv1982c	-	toxin VapC36	5	5	5517.7	7848.8	2331.1	0.51	0.5217	1
Rv0528	-	cytochrome C biogenesis protein	16	6	6	3.7	-2.4	-0.72	0.5224	1
Rv0537c	-	membrane protein	19	17	27948.1	23486.5	-4461.6	-0.25	0.5227	1
Rv0245	-	oxidoreductase	4	4	238.6	329.2	90.6	0.46	0.523	1
Rv3382c	-	LYTB1 protein	13	12	20831.8	16434.2	-4397.7	-0.34	0.5237	1
Rv3429	-	PPE family protein PPE59	21	18	12848.7	14665.5	1816.8	0.19	0.5237	1
Rv0546c	-	lactoylglutathione lyase	8	7	3728	2743.1	-984.9	-0.44	0.5238	1
Rv2499c	-	oxidase regulatory protein	6	4	508.1	734.4	226.3	0.53	0.5241	1
Rv3196	-	bacteriocin biosynthesis cyclodehydratase domain-containing protein	9	9	10618.3	8462.6	-2155.7	-0.33	0.5243	1
Rv3499c	-	MCE-family protein Mce4A	35	32	64733.5	55254	-9479.5	-0.23	0.5244	1
Rv0474	-	transcriptional regulator	8	8	18480.1	14008.1	-4472	-0.4	0.525	1
Rv2843	-	transmembrane alanine rich protein	7	3	45	18.9	-26.1	-1.25	0.525	1
Rv1764	-	transposase	23	14	9217.2	11415	2197.8	0.31	0.5255	1
Rv2088	-	transmembrane serine/threonine-protein kinase J PknJ	30	24	19450.7	22773.2	3322.5	0.23	0.5257	1
Rv2306B	-	membrane protein	6	4	2007.2	2885	877.8	0.52	0.5259	1
Rv1290c	-	hypothetical protein	34	33	38812.8	43634	4821.2	0.17	0.5261	1
Rv3792	-	arabinofuranosyltransferase AftA	38	17	1700.3	2769.6	1069.3	0.7	0.5269	1
Rv1722	-	carboxylase	23	21	41372.1	36077.5	-5294.6	-0.2	0.5271	1
Rv0029	-	hypothetical protein	18	16	17581.7	24622	7040.3	0.49	0.5272	1
Rv2793c	-	tRNA pseudouridine synthase B TruB	10	3	2077.4	2988	910.5	0.52	0.5273	1
Rv3351c	-	oxidoreductase	12	11	18091.5	20701.3	2609.8	0.19	0.5274	1
Rv3724A	-	cutinase Cut5a	8	8	9603.7	7206.6	-2397.1	-0.41	0.5278	1
Rv3367	-	PE-PGRS family protein PE_PGRS51	25	22	22005.5	18920.1	-3085.4	-0.22	0.5282	1
Rv0326	-	hypothetical protein	9	8	11414.7	8770.3	-2644.4	-0.38	0.529	1
Rv0613c	-	hypothetical protein	16	14	16691.8	20419.8	3728	0.29	0.5293	1
Rv1088	-	PE family protein PE9	6	5	4316.8	6728.4	2411.7	0.64	0.5296	1
Rv3799c	-	propionyl-CoA carboxylase beta chain 4 AccD4	19	8	7.9	5.5	-2.4	-0.52	0.53	1
Rv1650	-	phenylalanyl-tRNA synthetase beta chain PheT	37	13	10	7.6	-2.4	-0.4	0.5313	1
Rv2328	-	PE family protein PE23	13	9	7058.4	5648.9	-1409.5	-0.32	0.5313	1
Rv2841c	-	N utilization substance protein NusA	14	3	168.2	338.2	169.9	1.01	0.5318	1
Rv1500	-	glycosyltransferase	37	15	22958.6	18372.5	-4586.1	-0.32	0.5319	1
Rv3722c	-	hypothetical protein	32	12	3266.1	2100.9	-1165.2	-0.64	0.532	1
Rv1854c	-	NADH dehydrogenase Ndh	19	6	2051.7	880.7	-1171	-1.22	0.5321	1
Rv1639c	-	hypothetical protein	18	14	18366.9	23105.8	4739	0.33	0.5322	1
Rv0043c	-	transcriptional regulator GntR-family	10	8	1866.7	1387.8	-478.9	-0.43	0.5324	1
Rv1651c	-	PE-PGRS family protein PE_PGRS30	54	49	52285.9	46520.1	-5765.8	-0.17	0.5331	1
Rv0694	-	l-lactate dehydrogenase LldD1	18	11	3177.2	2443.4	-733.8	-0.38	0.5334	1
Rv3214	-	phosphoglycerate mutase Gpm2	12	10	7405.6	9173.1	1767.5	0.31	0.5338	1
Rv2283	-	hypothetical protein	4	4	1751.7	2382.2	630.5	0.44	0.5339	1
Rv0445c	-	RNA polymerase sigma factor SigK	10	10	16577.9	13800.1	-2777.7	-0.26	0.535	1
Rv3835	-	cell division protein, Z-ring complex Ib	19	18	24731.8	31635.1	6903.2	0.36	0.5352	1
Rv2765	-	carboxymethylenebutenolidase	15	14	13780.3	10871.7	-2908.6	-0.34	0.5357	1
Rv1346	-	acyl-CoA dehydrogenase MbtN	15	13	9545.6	11389.7	1844.1	0.25	0.5365	1
Rv0966c	-	hypothetical protein	9	9	9593	7818	-1775	-0.3	0.5372	1
Rv2536	-	transmembrane protein	9	6	6739.9	8056.5	1316.6	0.26	0.5374	1
Rv0141c	-	hypothetical protein	9	5	3390.6	4330.8	940.2	0.35	0.5376	1
Rv3082c	-	virulence-regulating transcriptional regulator VirS	19	14	11561.8	9502.8	-2059.1	-0.28	0.5377	1
Rv1694	-	2'-O-methyltransferase TlyA	11	8	6639.5	4927.9	-1711.6	-0.43	0.5383	1
Rv1928c	-	oxidoreductase	18	17	38831.7	32875.4	-5956.3	-0.24	0.5387	1
Rv2257c	-	hypothetical protein	8	6	5.9	9.3	3.4	0.66	0.5392	1
Rv0542c	-	O-succinylbenzoic acid-CoA ligase MenE	14	4	6	4.1	-1.9	-0.55	0.5393	1
Rv0433	-	carboxylate-amine ligase	24	19	25837.9	30213.6	4375.7	0.23	0.5395	1
Rv0992c	-	5-formyltetrahydrofolate cyclo-ligase	6	6	20428.9	15849.7	-4579.2	-0.37	0.5396	1
Rv0943c	-	oxidoreductase	17	15	19800	22488.8	2688.8	0.18	0.5397	1
Rv1273c	-	ABC transporter membrane protein	32	29	19226.8	16584.7	-2642.1	-0.21	0.5397	1
Rv2683	-	hypothetical protein	10	9	2208.2	2921.4	713.2	0.4	0.5397	1
Rv1526c	-	glycosyltransferase	19	16	14087.3	16506.7	2419.4	0.23	0.5402	1
Rv2868c	-	GcpE protein	13	8	52.5	276.2	223.7	2.39	0.5405	1
Rv1751	-	oxidoreductase	19	15	13449	11211.7	-2237.3	-0.26	0.5407	1
Rv2386A	-	hypothetical protein	4	4	4209.1	2722.1	-1486.9	-0.63	0.5409	1
Rv1164	-	respiratory nitrate reductase gamma chain NarI	19	19	24911.8	28869.8	3958	0.21	0.5415	1
Rv2405	-	hypothetical protein	10	10	8328.1	10687.8	2359.7	0.36	0.5415	1
Rv2545	-	antitoxin VapB18	11	10	16167.5	20228	4060.5	0.32	0.542	1
Rv1851	-	urease accessory protein UreF	2	2	3483	4248.6	765.6	0.29	0.5421	1
Rv1443c	-	hypothetical protein	2	2	543.1	721.7	178.6	0.41	0.5422	1
Rv2101	-	helicase HelZ	29	25	57867.7	51952.7	-5915	-0.16	0.5422	1
Rv0840c	-	proline iminopeptidase Pip	8	6	13996.3	12199.6	-1796.7	-0.2	0.5423	1
Rv0940c	-	oxidoreductase	15	11	6236.3	4745.3	-1491	-0.39	0.5425	1
Rv1542c	-	hemoglobin GlbN	8	8	3146.5	3958.8	812.3	0.33	0.5425	1
Rv1253	-	cold shock DeaD-box protein A DeaD	35	24	20060.9	16026.7	-4034.3	-0.32	0.5427	1
Rv0134	-	epoxide hydrolase EphF	12	10	21092.8	18091	-3001.8	-0.22	0.5429	1
Rv1368	-	lipoprotein LprF	8	7	21658.7	18325.6	-3333.1	-0.24	0.5429	1
Rv3104c	-	mechanosensitive small conductance ion channel protein MscS	12	11	16347.2	13145.2	-3202	-0.31	0.5429	1
Rv1707	-	SulP family sulfate permease	21	19	34099.5	29225.7	-4873.8	-0.22	0.543	1
Rv3161c	-	oxidoreductase	24	20	19344	15755.8	-3588.2	-0.3	0.5435	1
Rv3123	-	hypothetical protein	4	3	2096.8	3081	984.3	0.56	0.5437	1
Rv1175c	-	NADPH dependent 2,4-dienoyl-CoA reductase FadH	27	24	29369.2	25021.4	-4347.7	-0.23	0.5438	1
Rv1647	-	adenylate cyclase	12	11	18518.4	15790.6	-2727.8	-0.23	0.5441	1
Rv2299c	-	chaperone HtpG	28	25	25802.2	23018.5	-2783.7	-0.16	0.5441	1
Rv0858c	-	n-succinyldiaminopimelate aminotransferase DapC	20	16	7958.4	6807.5	-1150.9	-0.23	0.5442	1
Rv2366c	-	transmembrane protein	23	21	19274	9615.2	-9658.7	-1	0.5444	1
Rv2446c	-	integral membrane protein	7	7	14110.6	10480.1	-3630.5	-0.43	0.5444	1
Rv0036c	-	hypothetical protein	4	4	4571.6	5479.6	908.1	0.26	0.5447	1
Rv1357c	-	hypothetical protein	13	13	5010.3	6002.4	992.1	0.26	0.5447	1
Rv1082	-	mycothiol conjugate amidase Mca	13	12	13676.2	11289.7	-2386.5	-0.28	0.5449	1
Rv3084	-	acetyl-hydrolase/esterase LipR	14	14	12447.7	10886.9	-1560.8	-0.19	0.5451	1
Rv1395	-	transcriptional regulator	18	14	10522.7	12645.4	2122.6	0.27	0.5456	1
Rv2674	-	peptide methionine sulfoxide reductase MsrB	9	8	10902.3	7623.9	-3278.4	-0.52	0.5461	1
Rv1803c	-	PE-PGRS family protein PE_PGRS32	34	30	42348.7	47327.7	4979	0.16	0.5462	1
Rv1335	-	sulfur carrier protein CysO	5	5	19326	25567.3	6241.3	0.4	0.5463	1
Rv2768c	-	PPE family protein PPE43	19	16	28303	22061.2	-6241.8	-0.36	0.5466	1
Rv0157A	-	hypothetical protein	5	4	2912.2	2202.4	-709.8	-0.4	0.5469	1
Rv2372c	-	ribosomal RNA small subunit methyltransferase E	6	6	13700.2	11063.4	-2636.8	-0.31	0.5471	1
Rv1191	-	hypothetical protein	9	8	20969.6	16263.5	-4706.1	-0.37	0.5475	1
Rv0022c	-	transcriptional regulator WhiB-like WhiB5	8	7	19957.4	17393.6	-2563.8	-0.2	0.5481	1
Rv2893	-	oxidoreductase	11	9	9208.3	10970.1	1761.8	0.25	0.5484	1
Rv2565	-	hypothetical protein	26	20	30880.1	35713.5	4833.4	0.21	0.5485	1
Rv2729c	-	integral membrane protein	12	12	14694.6	12671	-2023.6	-0.21	0.5485	1
Rv3060c	-	transcriptional regulator GntR-family	25	19	18405	21707.5	3302.5	0.24	0.5485	1
Rv1249c	-	membrane protein	12	11	22684.3	17723.1	-4961.2	-0.36	0.5488	1
Rv2129c	-	oxidoreductase	13	11	18700.5	22748.8	4048.2	0.28	0.5492	1
Rv1383	-	carbamoyl-phosphate synthase small chain CarA	13	6	6	3.9	-2.1	-0.61	0.5497	1
Rv3868	-	ESX-1 secretion system protein EccA1	31	20	28645.3	25390.9	-3254.4	-0.17	0.5497	1
Rv3725	-	oxidoreductase	15	14	27165.8	30744.3	3578.6	0.18	0.5499	1
Rv1850	-	urease alpha subunit UreC	19	17	16474.5	18978.6	2504.1	0.2	0.55	1
Rv1107c	-	exodeoxyribonuclease VII small subunit XseB	2	2	1849.1	1345.6	-503.6	-0.46	0.5501	1
Rv3700c	-	hypothetical protein	12	11	11962.4	9883.1	-2079.3	-0.28	0.5503	1
Rv0634A	-	hypothetical protein	6	6	891.5	1440.5	549	0.69	0.5512	1
Rv2353c	-	PPE family protein PPE39	24	12	9783.1	7597.9	-2185.1	-0.36	0.5515	1
Rv1054	-	integrase	5	4	2976.5	3871.2	894.6	0.38	0.5518	1
Rv2251	-	flavoprotein	10	9	5401.9	3774.9	-1627.1	-0.52	0.5518	1
Rv2886c	-	resolvase	21	20	20989.6	18001.3	-2988.3	-0.22	0.5522	1
Rv0970	-	integral membrane protein	12	9	6582.9	8536.3	1953.5	0.37	0.5523	1
Rv3027c	-	N-acetyltransferase	22	18	17555.2	20726.6	3171.4	0.24	0.5528	1
Rv3749Ac	-	toxin	6	6	6090.4	5297.3	-793.1	-0.2	0.5537	1
Rv1688	-	3-methyladenine DNA glycosylase Mpg	9	9	12712	10132.9	-2579.1	-0.33	0.554	1
Rv1524	-	glycosyltransferase	14	11	5972.5	4563.7	-1408.7	-0.39	0.5542	1
Rv0523c	-	deazaflavin-dependent nitroreductase	9	8	8875.9	5963.5	-2912.4	-0.57	0.5546	1
Rv1732c	-	hypothetical protein	8	7	2302.3	2790.6	488.3	0.28	0.5548	1
Rv1705c	-	PPE family protein PPE22	27	21	36352.9	32043.8	-4309.1	-0.18	0.555	1
Rv0588	-	ABC transporter permease YrbE2B	16	12	11031.6	13571.5	2539.9	0.3	0.5552	1
Rv3162c	-	integral membrane protein	6	5	2429.1	3610.1	1181	0.57	0.5552	1
Rv0347	-	membrane protein	18	6	1448	2090	642	0.53	0.5555	1
Rv2398c	-	sulfate-transport ABC transporter integral membrane protein CysW	18	3	368.9	861.2	492.3	1.22	0.5559	1
Rv1116A	-	hypothetical protein	6	5	21521.6	14869.4	-6652.3	-0.53	0.556	1
Rv1602	-	amidotransferase HisH	11	3	32.3	72.8	40.5	1.17	0.5571	1
Rv2515c	-	hypothetical protein	21	16	7179.4	8399	1219.6	0.23	0.5571	1
Rv1182	-	polyketide synthase associated protein PapA3	40	27	21038.8	18413	-2625.8	-0.19	0.5575	1
Rv3876	-	ESX-1 secretion-associated protein EspI	25	22	28837.2	32585.7	3748.6	0.18	0.5578	1
Rv3196A	-	hypothetical protein	2	2	5209.7	4084.1	-1125.5	-0.35	0.5582	1
Rv1844c	-	6-phosphogluconate dehydrogenase Gnd1	16	15	41020.1	36395.6	-4624.5	-0.17	0.5584	1
Rv1367c	-	hypothetical protein	17	12	16561.3	19070	2508.7	0.2	0.5586	1
Rv0436c	-	CDP-diacylglycerol-serine O-phosphatidyltransferase PssA	17	13	142.4	93.2	-49.2	-0.61	0.5587	1
Rv2055c	-	30S ribosomal protein S18 RpsR2	4	2	6254	4268.9	-1985.1	-0.55	0.5587	1
Rv1948c	-	hypothetical protein	16	14	4466.9	3388	-1078.9	-0.4	0.5588	1
Rv0160c	-	PE family protein PE4	42	36	64730.7	57233.9	-7496.9	-0.18	0.5591	1
Rv1148c	-	hypothetical protein	23	18	15857.1	19169.4	3312.3	0.27	0.5595	1
Rv1571	-	hypothetical protein	3	2	42.5	8.9	-33.6	-2.25	0.5597	1
Rv3478	-	PE family protein PPE60	19	14	12715	10694.7	-2020.3	-0.25	0.5601	1
Rv0002	-	DNA polymerase III DnaN	31	11	5.9	8.3	2.3	0.48	0.5603	1
Rv1427c	-	long-chain-fatty-acid-CoA ligase FadD12	20	18	17173.7	14756.3	-2417.4	-0.22	0.5603	1
Rv0508	-	hypothetical protein	9	8	8325.7	6401.8	-1923.9	-0.38	0.5605	1
Rv2570	-	hypothetical protein	3	3	1723.9	2368.1	644.2	0.46	0.5605	1
Rv3185	-	transposase	23	15	4415.1	5803.6	1388.5	0.39	0.5607	1
Rv2172c	-	hypothetical protein	17	4	4	5.9	1.9	0.57	0.561	1
Rv3473c	-	peroxidase BpoA	9	6	2925.6	4642.6	1717	0.67	0.561	1	*
Rv1403c	-	methyltransferase	16	13	17606.4	14601.7	-3004.7	-0.27	0.5611	1
Rv2831	-	enoyl-CoA hydratase EchA16	7	7	6459	4752.3	-1706.7	-0.44	0.5614	1
Rv3552	-	coA-transferase	12	7	2882.6	1977.3	-905.3	-0.54	0.5614	1
Rv3720	-	cyclopropane-fatty-acyl-phospholipid synthase	30	26	40036.1	33106.9	-6929.2	-0.27	0.5614	1
Rv0431	-	hypothetical protein	10	7	1304.1	424.7	-879.5	-1.62	0.562	1
Rv1820	-	acetolactate synthase IlvG	20	18	29184.9	25198.2	-3986.7	-0.21	0.5622	1
Rv2393	-	ferrochelatase Che1	8	4	1687.3	1044.8	-642.4	-0.69	0.5627	1
Rv2331A	-	hypothetical protein	6	6	6312.9	7558.2	1245.3	0.26	0.5629	1
Rv0925c	-	manganese transporter	17	17	15229.6	19682.3	4452.7	0.37	0.563	1
Rv2899c	-	formate dehydrogenase accessory protein FdhD	14	12	4218.3	3191.8	-1026.5	-0.4	0.5633	1
Rv2819c	-	CRISPR type III-a/mtube-associated ramp protein csm5	23	18	10431.9	12419.6	1987.7	0.25	0.5637	1
Rv0276	-	hypothetical protein	17	14	10342.8	12047.4	1704.5	0.22	0.5638	1
Rv2748c	-	cell division transmembrane protein FtsK	30	13	2229.9	1452.8	-777.1	-0.62	0.5639	1
Rv2734	-	hypothetical protein	23	15	18367.7	15315.7	-3052	-0.26	0.5644	1
Rv0575c	-	oxidoreductase	14	14	19272.2	16416.4	-2855.8	-0.23	0.5646	1
Rv3328c	-	alternative RNA polymerase sigma factor SigJ	10	7	9766.1	8430.2	-1335.9	-0.21	0.5648	1
Rv2107	-	PE family protein PE22	10	9	7709.9	6153.8	-1556.1	-0.33	0.5654	1
Rv2850c	-	magnesium chelatase	17	14	10616.8	12392.9	1776	0.22	0.5654	1
Rv3354	-	hypothetical protein	8	8	7276.3	9270.1	1993.8	0.35	0.5654	1
Rv1001	-	arginine deiminase ArcA	21	19	27224.9	23309.5	-3915.4	-0.22	0.566	1
Rv2030c	-	erythromycin esterase	34	30	63532.7	30977.6	-32555	-1.04	0.566	1
Rv2462c	-	trigger factor protein Tig	19	18	12064.2	13836.9	1772.7	0.2	0.5662	1
Rv2417c	-	DegV family EDD domain-containing protein	12	12	11722.8	9314.2	-2408.6	-0.33	0.5663	1
Rv2337c	-	hypothetical protein	10	7	4756	5746.9	991	0.27	0.5664	1
Rv2425c	-	hypothetical protein	18	17	28904.7	24643.4	-4261.3	-0.23	0.5667	1
Rv0784	-	hypothetical protein	10	8	1805.7	2371.8	566.1	0.39	0.5672	1
Rv1730c	-	penicillin-binding protein	30	12	6883.3	8844.5	1961.1	0.36	0.5674	1
Rv0354c	-	PPE family protein PPE7	10	8	17100.6	20354.4	3253.8	0.25	0.5677	1
Rv0869c	-	molybdenum cofactor biosynthesis protein A2 MoaA2	14	12	13453.3	10988.4	-2465	-0.29	0.5677	1
Rv0585c	-	integral membrane protein	41	30	31250.9	26262.1	-4988.9	-0.25	0.568	1
Rv3513c	-	fatty-acid-CoA ligase FadD18	14	14	26274.3	21653.2	-4621	-0.28	0.568	1
[truncated: 2,037 more rows]
