# Supplementary material for: A nanocompartment system contributes to defense against oxidative stress in Mycobacterium tuberculosis
Source: eLife. 2021 Nov 9;10:e74358. doi: 10.7554/eLife.74358 (PMC8635971; doi:10.7554/eLife.74358)
Supplement: Supplementary file 1. [file elife-74358-supp1.xlsx]

## Sheet: Key
N	Number of TA sites in the gene
TAs Hit	Number of TA sites in the gene with a transposon insertion
Sum Rd 1	Sum of the read counts in control
Sum Rd 2	Sum of the read counts in experimental condition
Delta Rd	Difference in sum the of read counts between experimental condition and control
log2 FC	Log2 fold-change of experiment condition over control
p-value	P-value calculated by the permutation test
p-adj	Adjusted p-value controlling for the FDR (Benjamini-Hochberg)

## Sheet: TnSeq H2O2 low pH
Gene	Name	Description	N	TAs Hit	Sum Rd 1	Sum Rd 2	Delta Rd	log2 FC	p-value	p-adj	included in Fig 3A
RVBD_0001	-	chromosomal replication initiator protein DnaA	31	6	6	1.2	-4.8	-2.34	0.0904	1
RVBD_0002	-	DNA polymerase III DnaN	31	11	5.9	8.3	2.3	0.48	0.5603	1
RVBD_0003	-	DNA replication and repair protein RecF	35	24	1753.9	1556.4	-197.5	-0.17	0.7842	1
RVBD_0004	-	hypothetical protein	7	3	33.3	14.2	-19.1	-1.23	0.6063	1
RVBD_0005	-	DNA gyrase subunit B GyrB	39	9	7	2.9	-4.1	-1.28	0.1473	1
RVBD_0006	-	DNA gyrase subunit A GyrA	45	17	184.4	109.4	-75	-0.75	0.6853	1
RVBD_0007	-	membrane protein	10	7	1286	818.8	-467.2	-0.65	0.5063	1
RVBD_0008c	-	membrane protein	4	4	1273.9	1235.7	-38.1	-0.04	0.9926	1
RVBD_0009	-	iron-regulated peptidyl-prolyl cis-trans isomerase A PpiA	7	7	4592.5	4311.3	-281.2	-0.09	0.8732	1
RVBD_0010c	-	membrane protein	10	8	5737.9	5727.4	-10.5	0	0.9976	1
RVBD_0011c	-	cell division protein, PG complex	3	0	0	0	0	0	1	1
RVBD_0012	-	membrane protein	16	13	16629	2486.9	-14142.1	-2.74	0.0002	0.0448
RVBD_0013	-	anthranilate synthase component II TrpG	15	7	560.5	732.1	171.7	0.39	0.8211	1
RVBD_0014c	-	transmembrane serine/threonine-protein kinase B PknB	24	5	6.1	1.3	-4.8	-2.21	0.137	1
RVBD_0015c	-	transmembrane serine/threonine-protein kinase A PknA	16	6	318.2	354.6	36.4	0.16	0.9887	1
RVBD_0016c	-	penicillin-binding protein PbpA	37	18	1677.6	715.1	-962.5	-1.23	0.3451	1
RVBD_0017c	-	cell division protein RodA	27	21	3068.3	1414.4	-1653.9	-1.12	0.1013	1
RVBD_0018c	-	phosphoserine/threonine phosphatase PstP	25	15	18253.4	8070	-10183.5	-1.18	0.1675	1
RVBD_0019c	-	FHA domain-containing protein FhaB	13	13	13868.5	6823.3	-7045.2	-1.02	0.0422	0.9446
RVBD_0020c	-	FHA domain-containing protein FhaA	52	20	9041.4	3604.6	-5436.8	-1.33	0.0747	1
RVBD_0021c	-	nitronate monooxygenase	22	20	33904.9	33645.3	-259.5	-0.01	0.972	1
RVBD_0022c	-	transcriptional regulator WhiB-like WhiB5	8	7	19957.4	17393.6	-2563.8	-0.2	0.5481	1
RVBD_0023	-	transcriptional regulator	12	5	68.8	2.5	-66.3	-4.78	0.1592	1
RVBD_0024	-	secreted protein	12	11	27116.2	11455.1	-15661.1	-1.24	0.3285	1
RVBD_0025	-	hypothetical protein	7	7	4741.6	6337.2	1595.6	0.42	0.3696	1
RVBD_0026	-	hypothetical protein	14	10	17192.4	14649.8	-2542.6	-0.23	0.5078	1
RVBD_0027	-	hypothetical protein	5	4	2061.1	2245.8	184.7	0.12	0.7987	1
RVBD_0028	-	hypothetical protein	5	3	5621.8	4283.5	-1338.3	-0.39	0.4729	1
RVBD_0029	-	hypothetical protein	18	16	17581.7	24622	7040.3	0.49	0.5272	1
RVBD_0030	-	hypothetical protein	5	5	1256.7	914	-342.7	-0.46	0.6589	1
RVBD_0031	-	transposase	1	0	0	0	0	0	1	1
RVBD_0032	-	8-amino-7-oxononanoate synthase BioF2	57	39	45065.8	50795.7	5729.9	0.17	0.6213	1
RVBD_0033	-	acyl carrier protein AcpA	3	3	2607.8	2455.5	-152.2	-0.09	0.9132	1
RVBD_0034	-	hypothetical protein	5	5	3790	4084.5	294.5	0.11	0.8647	1
RVBD_0035	-	fatty-acid-CoA ligase FadD34	25	21	29656.6	26869.1	-2787.5	-0.14	0.6304	1
RVBD_0036c	-	hypothetical protein	4	4	4571.6	5479.6	908.1	0.26	0.5447	1
RVBD_0037c	-	integral membrane protein	20	18	79195.8	48456	-30739.8	-0.71	0.0609	1
RVBD_0038	-	transcriptional regulator	7	7	2912.2	1776	-1136.2	-0.71	0.2781	1
RVBD_0039c	-	transmembrane protein	4	4	7627.3	5755.1	-1872.2	-0.41	0.3568	1
RVBD_0040c	-	secreted proline rich protein Mtc28	9	7	5619.2	4356	-1263.2	-0.37	0.7554	1
RVBD_0041	-	leucyl-tRNA synthetase LeuS	72	17	18.8	3.9	-14.9	-2.26	0.0013	0.1809
RVBD_0042c	-	transcriptional regulator MarR-family	5	5	2719.6	2594.3	-125.3	-0.07	0.9201	1
RVBD_0043c	-	transcriptional regulator GntR-family	10	8	1866.7	1387.8	-478.9	-0.43	0.5324	1
RVBD_0044c	-	oxidoreductase	20	16	13295.3	16574.7	3279.4	0.32	0.4145	1
RVBD_0045c	-	hydrolase	7	5	11129.4	5668	-5461.3	-0.97	0.3945	1
RVBD_0046c	-	myo-inositol-1-phosphate synthase Ino1	16	1	2	0	-2	0.56	1	1
RVBD_0047c	-	hypothetical protein	7	5	29456.3	7452.3	-22003.9	-1.98	0.0176	0.6701
RVBD_0048c	-	membrane protein	16	16	50410.1	48715.7	-1694.4	-0.05	0.9376	1
RVBD_0049	-	hypothetical protein	8	8	4629.8	6718.4	2088.5	0.54	0.4309	1
RVBD_0050	-	bifunctional penicillin-binding protein 1A/1B PonA1	37	27	9439.3	6903	-2536.3	-0.45	0.3482	1
RVBD_0051	-	transmembrane protein	34	29	19505.8	30961.9	11456.1	0.67	0.1	1
RVBD_0052	-	hypothetical protein	7	7	9864.6	10017.4	152.8	0.02	0.9613	1
RVBD_0053	-	30S ribosomal protein S6 RpsF	7	0	0	0	0	0	1	1
RVBD_0054	-	single-strand DNA-binding protein Ssb	5	2	1	1.2	0.2	0.28	1	1
RVBD_0055	-	30S ribosomal protein S18 RpsR1	4	1	1606.7	1323.4	-283.3	-0.28	0.7015	1
RVBD_0056	-	50S ribosomal protein L9 RplI	7	4	25.6	13.1	-12.5	-0.96	0.6537	1
RVBD_0057	-	hypothetical protein	15	13	3278.5	5793.9	2515.3	0.82	0.147	1
RVBD_0058	-	replicative DNA helicase DnaB	39	8	7.9	1.6	-6.3	-2.33	0.0422	0.9446
RVBD_0059	-	hypothetical protein	19	17	33953.2	39711.4	5758.2	0.23	0.4287	1
RVBD_0060	-	hypothetical protein	24	6	2831.5	4875.3	2043.8	0.78	0.4458	1
RVBD_0061c	-	hypothetical protein	6	5	776.1	2288.4	1512.4	1.56	0.0152	0.639
RVBD_0062	-	cellulase CelA1	23	21	32544.8	35187.5	2642.8	0.11	0.7538	1
RVBD_0063	-	oxidoreductase	23	21	25744.1	25911.2	167.1	0.01	0.971	1
RVBD_0064	-	transmembrane protein	68	54	32210.8	29652	-2558.8	-0.12	0.6396	1
RVBD_0064A	-	antitoxin VapB1	5	5	12413.7	15175.3	2761.7	0.29	0.6584	1
RVBD_0065	-	toxin VapC1	8	7	3552.9	4379.3	826.4	0.3	0.6349	1
RVBD_0066c	-	isocitrate dehydrogenase Icd2	38	18	285.8	132.1	-153.7	-1.11	0.333	1
RVBD_0067c	-	transcriptional regulator TetR-family	12	11	4664.9	3121.7	-1543.2	-0.58	0.2992	1
RVBD_0068	-	oxidoreductase	12	8	14923.2	14856.6	-66.5	-0.01	0.991	1
RVBD_0069c	-	l-serine dehydratase SdaA	12	10	5961.2	12634.5	6673.4	1.08	0.0427	0.9446
RVBD_0070c	-	serine hydroxymethyltransferase GlyA2	18	15	19442.6	17970.1	-1472.6	-0.11	0.8216	1
RVBD_0071	-	RNA-directed DNA polymerase	9	7	3970.8	4653.8	683	0.23	0.7227	1
RVBD_0072	-	glutamine-transport ABC transporter transmembrane protein	16	12	51205.6	37090.1	-14115.5	-0.47	0.322	1
RVBD_0073	-	glutamine-transport ABC transporter ATP-binding protein	15	15	13274.8	21925.8	8651.1	0.72	0.0171	0.6701
RVBD_0074	-	hypothetical protein	19	17	23101.4	15883.5	-7218	-0.54	0.2082	1
RVBD_0075	-	cystathionine beta-lyase	24	21	25337	22314.5	-3022.5	-0.18	0.5928	1
RVBD_0076c	-	membrane protein	3	3	6478.8	4405.4	-2073.5	-0.56	0.1854	1
RVBD_0077c	-	oxidoreductase	15	13	10901.7	8221.4	-2680.3	-0.41	0.4868	1
RVBD_0078	-	transcriptional regulator	9	6	1319.2	782.4	-536.8	-0.75	0.6282	1
RVBD_0078A	-	hypothetical protein	10	8	8472.9	5868.6	-2604.3	-0.53	0.4249	1
RVBD_0078B	-	hypothetical protein	2	2	2160.7	3118.6	958	0.53	0.6217	1
RVBD_0079	-	hypothetical protein	14	12	15258	11397.9	-3860.1	-0.42	0.416	1
RVBD_0080	-	hypothetical protein	4	3	1899.9	2836.9	937	0.58	0.3723	1
RVBD_0081	-	ArsR family transcriptional regulator	5	5	5372.3	7284.6	1912.3	0.44	0.3829	1
RVBD_0082	-	oxidoreductase	7	6	1819.7	1510.1	-309.6	-0.27	0.7334	1
RVBD_0083	-	oxidoreductase	23	22	18744.5	23007.6	4263.1	0.3	0.4271	1
RVBD_0084	-	formate hydrogenlyase HycD	9	8	1805.5	3996.6	2191.1	1.15	0.3568	1
RVBD_0085	-	hydrogenase HycP	4	4	1962.7	877.4	-1085.4	-1.16	0.2697	1
RVBD_0086	-	hydrogenase HycQ	15	11	9414.8	8676.7	-738.1	-0.12	0.8596	1
RVBD_0087	-	formate hydrogenase HycE	25	18	5660.5	5827.2	166.7	0.04	0.9268	1
RVBD_0088	-	polyketide cyclase/dehydrase	14	10	8088.6	4637.8	-3450.8	-0.8	0.2857	1
RVBD_0089	-	methyltransferase	10	7	11900.5	8185.2	-3715.3	-0.54	0.3646	1
RVBD_0090	-	membrane protein	12	12	14986.1	16012.1	1026	0.1	0.8137	1
RVBD_0091	-	bifunctional MTA/SAH nucleosidase Mtn	11	7	17352.7	15774.8	-1577.9	-0.14	0.7903	1
RVBD_0092	-	cation transporter P-type ATPase CtpA	30	24	14536.4	6169	-8367.3	-1.24	0.007	0.4387
RVBD_0093c	-	membrane protein	9	8	3915.6	3475.7	-439.9	-0.17	0.8473	1
RVBD_0094c	-	hypothetical protein	14	13	2389.7	4659.4	2269.7	0.96	0.0924	1
RVBD_0095c	-	hypothetical protein	10	6	3690.3	1438.3	-2252	-1.36	0.1334	1
RVBD_0096	-	PPE family protein PPE1	34	31	35789.2	36082.7	293.5	0.01	0.9778	1
RVBD_0097	-	oxidoreductase	26	21	20621.8	27407.9	6786.1	0.41	0.2907	1
RVBD_0098	-	fatty-acyl-CoA thioesterase type III FcoT	11	9	4544.8	2617.7	-1927.1	-0.8	0.1789	1
RVBD_0099	-	fatty-acid-CoA ligase FadD10	32	24	18925.3	13677	-5248.2	-0.47	0.3928	1
RVBD_0100	-	hypothetical protein	3	2	2792.9	3415.7	622.8	0.29	0.7728	1
RVBD_0101	-	peptide synthetase Nrp	122	99	82607.6	85139.9	2532.3	0.04	0.796	1
RVBD_0102	-	membrane protein	42	8	8	5.3	-2.8	-0.61	0.4273	1
RVBD_0103c	-	cation-transporter P-type ATPase CtpB	31	23	37600.6	36090.3	-1510.3	-0.06	0.8904	1
RVBD_0104	-	hypothetical protein	27	22	32692.2	39054	6361.8	0.26	0.4459	1
RVBD_0105c	-	50S ribosomal protein L28 RpmB1	5	3	4222.4	3569.8	-652.6	-0.24	0.5713	1
RVBD_0106	-	hypothetical protein	12	10	11343.2	12292.8	949.6	0.12	0.8205	1
RVBD_0107c	-	cation-transporter P-type ATPase CtpI	66	52	48353	46201	-2152	-0.07	0.7855	1
RVBD_0108c	-	hypothetical protein	2	2	3449.9	5746	2296.1	0.74	0.6086	1
RVBD_0109	-	PE-PGRS family protein PE_PGRS1	27	25	9186.4	7983.1	-1203.3	-0.2	0.6044	1
RVBD_0110	-	integral membrane protein	14	14	41028.1	37122.6	-3905.5	-0.14	0.6665	1
RVBD_0111	-	transmembrane acyltransferase	42	35	30220.2	39831.9	9611.8	0.4	0.1772	1
RVBD_0112	-	GDP-mannose 4,6-dehydratase Gca	31	16	5049.7	7231.4	2181.7	0.52	0.3282	1
RVBD_0113	-	sedoheptulose-7-phosphate isomerase GmhA	12	5	465.2	1016.1	550.9	1.13	0.3163	1
RVBD_0114	-	d-alpha,beta-d-heptose-1,7-biphosphate phosphatase GmhB	9	8	9390.9	10426.1	1035.1	0.15	0.7775	1
RVBD_0115	-	d-alpha-d-heptose-7-phosphate kinase HddA	19	17	14940.6	11907.8	-3032.7	-0.33	0.3586	1
RVBD_0116c	-	l,d-transpeptidase LdtA	18	17	22558.7	21223.8	-1334.9	-0.09	0.8294	1
RVBD_0117	-	oxidative stress response regulatory protein OxyS	17	15	7734.7	9122.9	1388.3	0.24	0.5807	1
RVBD_0118c	-	oxalyl-CoA decarboxylase OxcA	26	23	9418.8	14867.4	5448.6	0.66	0.043	0.9446
RVBD_0119	-	fatty-acid-CoA ligase FadD7	13	8	349.1	235.5	-113.6	-0.57	0.5007	1
RVBD_0120c	-	elongation factor G FusA2	28	20	14534	13879.5	-654.5	-0.07	0.8848	1
RVBD_0121c	-	hypothetical protein	10	6	6695	5892.5	-802.5	-0.18	0.7546	1
RVBD_0122	-	hypothetical protein	9	7	1382.9	953.3	-429.6	-0.54	0.7277	1
RVBD_0123	-	hypothetical protein	8	8	950.1	1352.9	402.8	0.51	0.6014	1
RVBD_0124	-	PE-PGRS family protein PE_PGRS2	13	11	7665.4	8813.1	1147.7	0.2	0.75	1
RVBD_0125	-	serine protease PepA	10	10	5471.9	3736.3	-1735.6	-0.55	0.4062	1
RVBD_0126	-	trehalose synthase TreS	30	11	8.9	3.9	-5	-1.17	0.1227	1
RVBD_0127	-	maltokinase Mak	31	11	1321.5	3364	2042.5	1.35	0.173	1
RVBD_0128	-	transmembrane protein	19	16	32546.2	32253	-293.2	-0.01	0.9742	1
RVBD_0129c	-	6-O-acylglucoside esterase/glucoside 6-O-acyltransferase FbpC	27	22	3589.4	5214.7	1625.2	0.54	0.22	1
RVBD_0130	-	3-hydroxyl-thioester dehydratase	4	4	2791.6	4711.2	1919.7	0.76	0.2106	1
RVBD_0131c	-	acyl-CoA dehydrogenase FadE1	18	18	19005.1	15340.3	-3664.9	-0.31	0.5119	1
RVBD_0132c	-	F420-dependent glucose-6-phosphate dehydrogenase Fgd2	15	15	27593.3	17081.3	-10512	-0.69	0.0868	1
RVBD_0133	-	N-acetyltransferase	7	7	16901.5	19435.2	2533.7	0.2	0.6642	1
RVBD_0134	-	epoxide hydrolase EphF	12	10	21092.8	18091	-3001.8	-0.22	0.5429	1
RVBD_0135c	-	transcriptional regulator	12	11	3318.1	2667	-651.1	-0.32	0.8125	1
RVBD_0136	-	cytochrome P450 138 Cyp138	23	21	34231.2	27712.9	-6518.2	-0.3	0.4126	1
RVBD_0137c	-	peptide methionine sulfoxide reductase MsrA	11	8	8183.5	5964.4	-2219.1	-0.46	0.4702	1
RVBD_0138	-	hypothetical protein	6	6	22866.6	20005.2	-2861.3	-0.19	0.6295	1
RVBD_0139	-	oxidoreductase	12	11	24040.7	23762.4	-278.2	-0.02	0.9633	1
RVBD_0140	-	hypothetical protein	15	14	13206	11341.9	-1864	-0.22	0.6055	1
RVBD_0141c	-	hypothetical protein	9	5	3390.6	4330.8	940.2	0.35	0.5376	1
RVBD_0142	-	hypothetical protein	6	6	36422.8	5499.4	-30923.4	-2.73	0.7019	1
RVBD_0143c	-	CIC family chloride channel protein	28	25	34269.1	24369.2	-9899.9	-0.49	0.1289	1
RVBD_0144	-	transcriptional regulator TetR-family	14	12	29002.5	25640.7	-3361.8	-0.18	0.748	1
RVBD_0145	-	s-adenosylmethionine-dependent methyltransferase	15	13	9545.7	13299.2	3753.5	0.48	0.1551	1
RVBD_0146	-	s-adenosylmethionine-dependent methyltransferase	16	14	27558.1	27794.3	236.2	0.01	0.9786	1
RVBD_0147	-	aldehyde dehydrogenase (NAD+)	26	24	121450	59254.4	-62195.7	-1.04	0.0003	0.0605
RVBD_0148	-	oxidoreductase	16	15	26554.1	18346.3	-8207.8	-0.53	0.1467	1
RVBD_0149	-	NADPH2:quinone reductase	21	18	25094.4	26964.4	1870	0.1	0.7279	1
RVBD_0150c	-	hypothetical protein	5	4	597.9	658.1	60.2	0.14	0.9323	1
RVBD_0151c	-	PE family protein PE1	44	41	64110.7	73232.7	9122	0.19	0.3804	1
RVBD_0152c	-	PE family protein PE2	40	36	66808.2	66507.9	-300.3	-0.01	0.9707	1
RVBD_0153c	-	phosphotyrosine protein phosphatase PtpB	11	10	5810	4004	-1806	-0.54	0.4076	1
RVBD_0154c	-	acyl-CoA dehydrogenase FadE2	12	12	13989.6	9865.5	-4124.1	-0.5	0.3332	1
RVBD_0155	-	NAD(P) transhydrogenase subunit alpha PntAa	10	9	1686.5	219.6	-1466.9	-2.94	0.0226	0.7416
RVBD_0156	-	NAD(P) transhydrogenase subunit alpha PntAb	1	1	140	96.4	-43.6	-0.54	0.6004	1
RVBD_0157	-	NAD(P) transhydrogenase subunit beta PntB	14	13	3243.9	1059.6	-2184.3	-1.61	0.0035	0.2883
RVBD_0157A	-	hypothetical protein	5	4	2912.2	2202.4	-709.8	-0.4	0.5469	1
RVBD_0158	-	transcriptional regulator TetR-family	16	15	30251.7	28411.8	-1839.9	-0.09	0.7541	1
RVBD_0159c	-	PE family protein PE3	50	47	106355	97053.2	-9302.1	-0.13	0.5995	1
RVBD_0160c	-	PE family protein PE4	42	36	64730.7	57233.9	-7496.9	-0.18	0.5591	1
RVBD_0161	-	oxidoreductase	19	17	8754.5	10016.2	1261.7	0.19	0.6641	1
RVBD_0162c	-	zinc-type alcohol dehydrogenase AdhE1	17	15	11723.4	15228.5	3505.1	0.38	0.2755	1
RVBD_0163	-	acyl-CoA thioester hydrolase	10	9	9865.9	10126.8	260.8	0.04	0.9169	1
RVBD_0164	-	hypothetical protein	8	3	9178.3	8085.4	-1092.9	-0.18	0.7639	1
RVBD_0165c	-	transcriptional regulator Mce1R	6	5	12273.6	7000.9	-5272.7	-0.81	0.1121	1
RVBD_0166	-	fatty-acid-CoA ligase FadD5	27	22	29736.5	29196.8	-539.7	-0.03	0.9313	1
RVBD_0167	-	ABC transporter permease YrbE1A	7	7	6155.9	3234.7	-2921.2	-0.93	0.2	1
RVBD_0168	-	ABC transporter permease YrbE1B	14	14	34733.9	16422.9	-18311	-1.08	0.0009	0.1345
RVBD_0169	-	MCE-family protein Mce1A	39	35	97254	43429.8	-53824.2	-1.16	0.0001	0.0237
RVBD_0170	-	MCE-family protein Mce1B	18	15	45052.2	20263.2	-24789	-1.15	0.0026	0.2595
RVBD_0171	-	MCE-family protein Mce1C	25	24	58358.1	31799.4	-26558.7	-0.88	0.0095	0.5057
RVBD_0172	-	MCE-family protein Mce1D	33	28	63252	27598.8	-35653.1	-1.2	0.0001	0.0237
RVBD_0173	-	MCE-family lipoprotein LprK	16	14	46383	22170.5	-24212.5	-1.06	0.0014	0.1883
RVBD_0174	-	MCE-family protein Mce1F	31	26	70944.3	29141.4	-41802.8	-1.28	0	0
RVBD_0175	-	MCE-associated membrane protein	9	7	8758	4943.1	-3815	-0.83	0.3012	1
RVBD_0176	-	MCE-associated membrane protein	15	14	35993.9	14686.8	-21307.1	-1.29	0.0004	0.0702
RVBD_0177	-	MCE-associated membrane protein	12	10	13936.7	7819.2	-6117.5	-0.83	0.1523	1
RVBD_0178	-	MCE-associated membrane protein	11	9	28642.1	10702.2	-17939.8	-1.42	0.0027	0.2595
RVBD_0179c	-	lipoprotein LprO	23	19	27806.7	27909.9	103.3	0.01	0.9888	1
RVBD_0180c	-	YhgE/Pip domain-containing protein	29	8	433.7	311.8	-121.9	-0.48	0.8967	1
RVBD_0181c	-	hypothetical protein	16	13	92506.5	51174.1	-41332.3	-0.85	0.4409	1
RVBD_0182c	-	alternative RNA polymerase sigma factor SigG	21	16	21566.8	22044.4	477.6	0.03	0.9244	1
RVBD_0183	-	lysophospholipase	16	14	58046.7	41714.4	-16332.3	-0.48	0.1113	1
RVBD_0184	-	hypothetical protein	11	9	12622.5	7349.6	-5272.9	-0.78	0.2901	1
RVBD_0185	-	hypothetical protein	10	5	6859.2	6207.8	-651.4	-0.14	0.8889	1
RVBD_0186	-	beta-glucosidase BglS	34	28	20361.6	26635.7	6274.1	0.39	0.2214	1
RVBD_0186Ac	-	metallothionein MymT	4	4	2127	2850.4	723.4	0.42	0.4859	1
RVBD_0187	-	O-methyltransferase	7	4	2891	4423	1532	0.61	0.3213	1
RVBD_0188	-	transmembrane protein	10	6	5555	6621.7	1066.7	0.25	0.6327	1
RVBD_0189c	-	dihydroxy-acid dehydratase IlvD	23	5	3	2.6	-0.3	-0.18	1	1
RVBD_0190	-	hypothetical protein	3	3	965.5	1062.9	97.5	0.14	0.8152	1
RVBD_0191	-	integral membrane protein	19	18	37178.8	30878	-6300.8	-0.27	0.3808	1
RVBD_0192	-	hypothetical protein	14	13	27551.3	36931.3	9380	0.42	0.1539	1
RVBD_0192A	-	secreted protein	3	3	3285.4	4942	1656.6	0.59	0.3075	1
RVBD_0193c	-	hypothetical protein	35	31	43522.1	42560.7	-961.4	-0.03	0.8791	1
RVBD_0194	-	transmembrane multidrug efflux pump	55	49	101842	99128.8	-2713.5	-0.04	0.8576	1
RVBD_0195	-	two-component system transcriptional regulator, LuxR-family	6	6	5507.7	7858.9	2351.2	0.51	0.2811	1
RVBD_0196	-	transcriptional regulator	7	7	5664	4499.4	-1164.6	-0.33	0.5215	1
RVBD_0197	-	oxidoreductase	31	29	23626.7	21918	-1708.7	-0.11	0.6864	1
RVBD_0198c	-	zinc metalloprotease Zmp1	42	35	24448.9	19631.7	-4817.1	-0.32	0.2968	1
RVBD_0199	-	membrane protein	12	11	38169.1	13153.5	-25015.6	-1.54	0.0861	1
RVBD_0200	-	transmembrane protein	7	6	9088.3	3798.5	-5289.9	-1.26	0.1833	1
RVBD_0201c	-	hypothetical protein	8	7	5363.1	6638.7	1275.6	0.31	0.6153	1
RVBD_0202c	-	transmembrane transporter MmpL11	39	35	29860.4	32276.4	2415.9	0.11	0.6365	1
RVBD_0203	-	exported protein	3	3	1279.9	1160.9	-119.1	-0.14	0.8498	1
RVBD_0204c	-	transmembrane protein	19	17	11005.4	7475.1	-3530.2	-0.56	0.1222	1
RVBD_0205	-	membrane protein	12	10	10447.7	10817.9	370.2	0.05	0.9291	1
RVBD_0206c	-	transmembrane transporter MmpL3	34	9	631.1	258.7	-372.4	-1.29	0.3868	1
RVBD_0207c	-	hypothetical protein	9	7	6820	6909.9	89.9	0.02	0.9797	1
RVBD_0208c	-	methyltransferase	12	5	506.5	177.4	-329	-1.51	0.4633	1
RVBD_0209	-	hypothetical protein	15	12	8457.7	8824.2	366.5	0.06	0.8893	1
RVBD_0210	-	hypothetical protein	13	11	15197.7	18278.1	3080.3	0.27	0.511	1
RVBD_0211	-	iron-regulated phosphoenolpyruvate carboxykinase PckA	24	13	1080.3	1287.2	206.9	0.25	0.6927	1
RVBD_0212c	-	transcriptional regulator AsnC-family	6	5	9121.5	8547.5	-573.9	-0.09	0.8414	1
RVBD_0213c	-	methyltransferase	31	27	32239.8	23932.5	-8307.3	-0.43	0.204	1
RVBD_0214	-	fatty-acid-CoA ligase FadD4	34	30	37001.9	35725.5	-1276.4	-0.05	0.8568	1
RVBD_0215c	-	acyl-CoA dehydrogenase FadE3	18	16	25582.3	16291.4	-9290.8	-0.65	0.1772	1
RVBD_0216	-	double hotdog hydratase	23	16	17153.6	13923.8	-3229.7	-0.3	0.6834	1
RVBD_0217c	-	esterase LipW	21	17	14157.5	11359.2	-2798.3	-0.32	0.3661	1
RVBD_0218	-	transmembrane protein	19	17	15792.1	20247.1	4454.9	0.36	0.2896	1
RVBD_0219	-	transmembrane protein	11	9	8152.1	15402.6	7250.6	0.92	0.4844	1
RVBD_0220	-	esterase LipC	24	22	14359.9	9071.3	-5288.6	-0.66	0.1311	1
RVBD_0221	-	diacylglycerol acyltransferase	28	21	23607.5	24711.3	1103.7	0.07	0.8473	1
RVBD_0222	-	enoyl-CoA hydratase EchA1	8	7	4657	4308.7	-348.3	-0.11	0.8541	1
RVBD_0223c	-	aldehyde dehydrogenase (NAD+)	25	19	17409.4	16211.8	-1197.6	-0.1	0.7543	1
RVBD_0224c	-	methyltransferase	15	5	3	2.4	-0.6	-0.34	1	1
RVBD_0225	-	glycosyltransferase	20	7	7	1.3	-5.7	-2.41	0.0856	1
RVBD_0226c	-	transmembrane protein	29	10	3583.8	3420.5	-163.3	-0.07	0.8689	1
RVBD_0227c	-	membrane protein	23	4	4	2.6	-1.3	-0.6	0.6946	1
RVBD_0228	-	membrane acyltransferase	14	4	407.4	87.9	-319.5	-2.21	0.8371	1
RVBD_0229Ac	-	antitoxin	2	1	29.4	54	24.5	0.87	0.4009	1
RVBD_0229c	-	toxin	7	7	14223.5	10235	-3988.5	-0.47	0.5056	1
RVBD_0230c	-	phosphotriesterase Php	16	14	27697.9	23597.7	-4100.2	-0.23	0.5697	1
RVBD_0231	-	acyl-CoA dehydrogenase FadE4	36	36	58164.4	63459.9	5295.5	0.13	0.6247	1
RVBD_0232	-	transcriptional regulator TetR/AcrR-family	9	9	20201.4	17285.5	-2915.9	-0.22	0.6937	1
RVBD_0233	-	ribonucleoside-diphosphate reductase NrdB	11	11	15907.7	17802.7	1894.9	0.16	0.7849	1
RVBD_0234c	-	succinate-semialdehyde dehydrogenase [NADP] dependent GabD1	23	17	9042.2	6165.1	-2877.1	-0.55	0.1932	1
RVBD_0235c	-	transmembrane protein	27	21	12862.8	16649.3	3786.5	0.37	0.243	1
RVBD_0236A	-	decaprenol phosphoarabinose-dependent alpha-1,3-branching arabinosyltransferase	3	1	1	0	-1	1.62	1	1
RVBD_0236c	-	arabinofuranosyltransferase AftD	39	16	12.9	10.8	-2.1	-0.26	0.6991	1
RVBD_0237	-	lipoprotein LpqI	13	8	3065.7	4984	1918.3	0.7	0.4251	1
RVBD_0238	-	transcriptional regulator TetR-family	13	8	3488	2066.9	-1421.1	-0.75	0.4017	1
RVBD_0239	-	antitoxin VapB24	2	2	2399.6	1090.5	-1309	-1.14	0.0476	0.9606
RVBD_0240	-	toxin VapC24	9	9	4396.4	7460.7	3064.3	0.76	0.2397	1
RVBD_0241c	-	3-hydroxyacyl-thioester dehydratase HtdX	16	14	1365.4	3151.6	1786.2	1.21	0.0279	0.8433
RVBD_0242c	-	3-oxoacyl-[acyl-carrier protein] reductase FabG4	11	8	563.6	620.1	56.5	0.14	0.8406	1
RVBD_0243	-	acetyl-CoA acyltransferase FadA2	20	15	2084.1	1816.5	-267.6	-0.2	0.7838	1
RVBD_0244c	-	acyl-CoA dehydrogenase FadE5	23	17	86.7	121	34.3	0.48	0.4878	1
RVBD_0245	-	oxidoreductase	4	4	238.6	329.2	90.6	0.46	0.523	1
RVBD_0246	-	integral membrane protein	33	26	18828.6	20401.2	1572.6	0.12	0.7543	1
RVBD_0247c	-	succinate dehydrogenase [iron-sulfur subunit]	12	8	622.7	38.7	-584	-4.01	0.343	1
RVBD_0248c	-	succinate dehydrogenase [iron-sulfur subunit] SdhA_1	39	27	163.8	184.5	20.7	0.17	0.8197	1
RVBD_0249c	-	succinate dehydrogenase [membrane anchor subunit]	23	15	130.1	133.9	3.8	0.04	0.949	1
RVBD_0250c	-	hypothetical protein	4	4	1201.6	1153	-48.6	-0.06	0.9418	1
RVBD_0251c	-	heat shock protein Hsp	5	5	3657.8	4332	674.2	0.24	0.7325	1
RVBD_0252	-	nitrite reductase [NAD(P)H] large subunit NirB	41	36	20587.4	28372.9	7785.5	0.46	0.1052	1
RVBD_0253	-	nitrite reductase [NAD(P)H] small subunit NirD	7	6	8705.9	6653.2	-2052.7	-0.39	0.4447	1
RVBD_0254c	-	adenosylcobinamide kinase/adenosylcobinamide-phosphate guanylyltransferase CobU	6	5	10563.9	8584	-1979.8	-0.3	0.508	1
RVBD_0255c	-	cobyric acid synthase CobQ1	15	14	14152.2	14293.2	140.9	0.01	0.978	1
RVBD_0256c	-	PPE family protein PPE2	32	28	54436.9	36462.3	-17974.6	-0.58	0.7355	1
RVBD_0257	-	hypothetical protein	3	3	1446	3088.3	1642.3	1.09	0.1046	1
RVBD_0258c	-	hypothetical protein	8	6	1928.6	3590.6	1662	0.9	0.4396	1
RVBD_0259c	-	hypothetical protein	8	7	4713	3101.9	-1611.1	-0.6	0.48	1
RVBD_0260c	-	transcriptional regulator	22	16	9798.6	9392.3	-406.3	-0.06	0.891	1
RVBD_0261c	-	integral membrane nitrite extrusion protein NarK3	25	18	17493.4	13939.2	-3554.2	-0.33	0.435	1
RVBD_0262c	-	aminoglycoside 2'-N-acetyltransferase Aac	7	6	4100.2	4128.7	28.5	0.01	0.9916	1
RVBD_0263c	-	allophanate hydrolase	16	14	5071	5373.5	302.5	0.08	0.8771	1
RVBD_0264c	-	hypothetical protein	10	8	8920.2	7980.6	-939.5	-0.16	0.7515	1
RVBD_0265c	-	iron complex transporter substrate-binding protein	9	9	15901.1	9328.5	-6572.6	-0.77	0.1854	1
RVBD_0266c	-	5-oxoprolinase OplA	42	37	59251.1	51826.7	-7424.3	-0.19	0.4539	1
RVBD_0267	-	integral membrane nitrite extrusion protein NarU	15	13	19892.6	21214.8	1322.3	0.09	0.7517	1
RVBD_0268c	-	prevent-host-death family protein	13	13	26765	27612.4	847.4	0.04	0.8858	1
RVBD_0269c	-	DNA polymerase LigD	11	10	14154.3	12647.8	-1506.5	-0.16	0.6871	1
RVBD_0270	-	fatty-acid-CoA ligase FadD2	25	24	15625.6	13872.1	-1753.5	-0.17	0.7513	1
RVBD_0271c	-	acyl-CoA dehydrogenase FadE6	34	29	38796.9	37480.3	-1316.6	-0.05	0.85	1
RVBD_0272c	-	hypothetical protein	16	12	12026	14424.9	2398.9	0.26	0.5882	1
RVBD_0273c	-	transcriptional regulator	17	14	12266.6	12782	515.4	0.06	0.8614	1
RVBD_0274	-	glyoxalase/bleomycin resistance protein/dioxygenase	8	7	4679.8	4339.5	-340.2	-0.11	0.8391	1
RVBD_0275c	-	transcriptional regulator TetR-family	9	6	3052.2	2882.1	-170.1	-0.08	0.8848	1
RVBD_0276	-	hypothetical protein	17	14	10342.8	12047.4	1704.5	0.22	0.5638	1
RVBD_0277Ac	-	antitoxin	4	3	4592	3307.9	-1284.1	-0.47	0.5052	1
RVBD_0277c	-	toxin VapC25	6	5	7440.1	4384.3	-3055.8	-0.76	0.232	1
RVBD_0278c	-	PE-PGRS family protein PE_PGRS3	26	22	18898.8	14471.8	-4427	-0.39	0.4242	1
RVBD_0279c	-	PE-PGRS family protein PE_PGRS4	19	16	9559.2	8863	-696.2	-0.11	0.7653	1
RVBD_0280	-	PPE family protein PPE3	26	24	23458.9	29744.7	6285.8	0.34	0.2561	1
RVBD_0281	-	s-adenosylmethionine-dependent methyltransferase	14	13	15493.9	18875.5	3381.5	0.28	0.397	1
RVBD_0282	-	ESX-3 secretion system protein EccA3	24	9	191.3	2702.8	2511.6	3.82	0.2426	1
RVBD_0283	-	ESX-3 secretion system protein EccB3	24	7	10	2.8	-7.2	-1.85	0.0432	0.9446
RVBD_0284	-	ESX-3 secretion system protein EccC3	61	21	23.9	16.8	-7.1	-0.51	0.3722	1
RVBD_0285	-	PE family protein PE5	5	2	3	0	-3	0.02	0.4539	1
RVBD_0286	-	PPE family protein PPE4	31	12	15.9	17.8	2	0.17	0.8246	1
RVBD_0287	-	ESAT-6 like protein EsxG	5	2	11.1	2.9	-8.3	-1.95	0.6617	1
RVBD_0288	-	antigen 7 EsxH	7	2	1	1.3	0.3	0.37	1	1
RVBD_0289	-	ESX-3 secretion-associated protein EspG3	13	1	0	1.2	1.2	-1.34	1	1
RVBD_0290	-	ESX-3 secretion system protein EccD3	19	6	2	12.9	10.9	2.69	0.0893	1
RVBD_0291	-	membrane-anchored mycosin MycP3	13	8	6	6.7	0.7	0.16	0.8622	1
RVBD_0292	-	ESX-3 secretion system protein EccE3	17	7	334.6	460.4	125.8	0.46	0.8613	1
RVBD_0293c	-	hypothetical protein	27	22	21305.4	18529.4	-2776	-0.2	0.5854	1
RVBD_0294	-	trans-aconitate methyltransferase Tam	14	12	17086	12135.1	-4950.9	-0.49	0.4171	1
RVBD_0295c	-	trehalose sulfotransferase	10	7	6209.7	4745.7	-1464	-0.39	0.6283	1
RVBD_0296c	-	sulfatase	42	33	31905	33579	1674	0.07	0.8585	1
RVBD_0297	-	PE-PGRS family protein PE_PGRS5	14	13	15000.9	15887.2	886.3	0.08	0.8688	1
RVBD_0298	-	antitoxin	5	4	4880.1	5785.9	905.9	0.25	0.6018	1
RVBD_0299	-	toxin	2	2	3135.3	4103.6	968.3	0.39	0.7778	1
RVBD_0300	-	antitoxin VapB2	5	5	11134.2	15223.7	4089.5	0.45	0.2895	1
RVBD_0301	-	toxin VapC2	7	7	19298.6	15814.7	-3483.9	-0.29	0.4603	1
RVBD_0302	-	transcriptional regulator TetR/AcrR-family	8	8	12016.7	12696	679.4	0.08	0.8389	1
RVBD_0303	-	light-dependent protochlorophyllide reductase	12	12	19767.7	20370.2	602.6	0.04	0.8961	1
RVBD_0304c	-	PPE family protein PPE5	136	118	90140.1	95584.2	5444.1	0.08	0.6241	1
RVBD_0305c	-	PPE family protein PPE6	60	50	43061.7	44652.7	1591	0.05	0.8133	1
RVBD_0306	-	cob(II)yrinic acid a,c-diamide reductase	8	7	9528.2	6988.3	-2539.8	-0.45	0.4085	1
RVBD_0307c	-	hypothetical protein	9	8	4584.8	5096.7	512	0.15	0.8415	1
RVBD_0308	-	integral membrane protein	15	13	6054.5	8196	2141.5	0.44	0.28	1
RVBD_0309	-	exported protein	12	10	6752.4	9652.7	2900.3	0.52	0.199	1
RVBD_0310c	-	hypothetical protein	12	10	1994.3	4480.1	2485.8	1.17	0.0609	1
RVBD_0311	-	hypothetical protein	17	15	18006.9	11830.7	-6176.2	-0.61	0.1715	1
RVBD_0312	-	proline and threonine rich protein	22	15	3586.4	5030.8	1444.4	0.49	0.3858	1
RVBD_0313	-	hypothetical protein	5	5	6191.9	4240.6	-1951.4	-0.55	0.3493	1
RVBD_0314c	-	membrane protein	7	6	34187.4	19269.6	-14917.8	-0.83	0.1056	1
RVBD_0315	-	beta-1,3-glucanase	10	10	13342.6	14462.6	1120	0.12	0.8185	1
RVBD_0316	-	muconolactone delta-isomerase	8	5	4153.1	9226.4	5073.3	1.15	0.0896	1
RVBD_0317c	-	glycerophosphoryl diester phosphodiesterase GlpQ2	13	12	20782	15336.2	-5445.8	-0.44	0.3256	1
RVBD_0318c	-	ZIP family zinc transporter	8	8	8558.1	6747	-1811.1	-0.34	0.4144	1
RVBD_0319	-	pyrrolidone-carboxylate peptidase Pcp	8	7	4580.9	7588	3007.1	0.73	0.3376	1
RVBD_0320	-	exported protein NLP/P60 family member	16	13	20839.8	20113.4	-726.4	-0.05	0.8921	1
RVBD_0321	-	deoxycytidine triphosphate deaminase Dcd	6	5	9393.4	7593.3	-1800.1	-0.31	0.4729	1
RVBD_0322	-	UDP-glucose 6-dehydrogenase UdgA	24	16	10120.7	6200.2	-3920.6	-0.71	0.2475	1
RVBD_0323c	-	hypothetical protein	12	10	7455	6940.8	-514.2	-0.1	0.906	1
RVBD_0324	-	transcriptional regulator ArsR-family	12	9	260.9	513.2	252.3	0.98	0.4319	1
RVBD_0325	-	hypothetical protein	6	6	14331	14338.6	7.6	0	0.9978	1
RVBD_0326	-	hypothetical protein	9	8	11414.7	8770.3	-2644.4	-0.38	0.529	1
RVBD_0327c	-	cytochrome P450 135A1 Cyp135A1	24	15	11882.9	12494.5	611.5	0.07	0.848	1
RVBD_0328	-	transcriptional regulator TetR/AcrR-family	11	9	1062.9	1668.8	605.8	0.65	0.3046	1
RVBD_0329c	-	hypothetical protein	9	7	6597.4	7778.4	1181	0.24	0.7354	1
RVBD_0330c	-	hypothetical protein	9	8	10769.9	16904.7	6134.8	0.65	0.174	1
RVBD_0331	-	oxidoreductase	18	16	15717.3	17083.2	1365.9	0.12	0.7527	1
RVBD_0332	-	hypothetical protein	12	12	16888.1	19044.9	2156.8	0.17	0.6895	1
RVBD_0333	-	hypothetical protein	4	3	2298.5	1932.1	-366.4	-0.25	0.7511	1
RVBD_0334	-	glucose-1-phosphate thymidylyltransferase RmlA	19	5	5	2.5	-2.5	-1	0.4741	1
RVBD_0335c	-	PE family protein PE6	2	1	0	1.6	1.6	-0.93	1	1
RVBD_0336	-	13E12 repeat family protein	18	14	7331	9257.4	1926.5	0.34	0.5132	1
RVBD_0337c	-	aspartate aminotransferase AspC	22	5	5.1	3.5	-1.5	-0.51	0.7596	1
RVBD_0338c	-	oxidoreductase	37	8	6	5.1	-0.9	-0.24	0.7439	1
RVBD_0339c	-	transcriptional regulator	30	22	12711.6	18420.4	5708.8	0.54	0.1394	1
RVBD_0340	-	hypothetical protein	5	4	2140.5	2946.4	805.9	0.46	0.6917	1
RVBD_0341	-	isoniazid inducible protein IniB	19	15	15496.8	12781.8	-2714.9	-0.28	0.6014	1
RVBD_0342	-	isoniazid inducible protein IniA	27	25	36700.3	34299.4	-2400.9	-0.1	0.7223	1
RVBD_0343	-	isoniazid inducible protein IniC	13	10	14637.2	10800.4	-3836.9	-0.44	0.3746	1
RVBD_0344c	-	lipoprotein LpqJ	12	12	18002.8	13233.4	-4769.4	-0.44	0.3388	1
RVBD_0345	-	hypothetical protein	7	7	9139.2	9836	696.8	0.11	0.8252	1
RVBD_0346c	-	l-asparagine permease AnsP2	29	23	50615.4	63862.4	13247	0.34	0.2446	1
RVBD_0347	-	membrane protein	18	6	1448	2090	642	0.53	0.5555	1
RVBD_0348	-	transcriptional regulator	18	10	100.8	984.1	883.3	3.29	0.002	0.2446
RVBD_0349	-	hypothetical protein	8	8	19977.1	24118.3	4141.2	0.27	0.331	1
RVBD_0350	-	chaperone DnaK	17	4	2	3.5	1.5	0.81	0.6032	1
RVBD_0351	-	protein GrpE	9	3	136.2	308.3	172.1	1.18	0.3981	1
RVBD_0352	-	chaperone DnaJ1	14	6	5581	3664.4	-1916.6	-0.61	0.7674	1
RVBD_0353	-	heat shock protein transcriptional repressor HspR	6	5	4693.1	2610.9	-2082.2	-0.85	0.169	1
RVBD_0354c	-	PPE family protein PPE7	10	8	17100.6	20354.4	3253.8	0.25	0.5677	1
RVBD_0355c	-	PPE family protein PPE8	172	147	182179	211276	29097.3	0.21	0.0823	1
RVBD_0356c	-	hypothetical protein	9	7	7984	3866.7	-4117.4	-1.05	0.1883	1
RVBD_0357c	-	adenylosuccinate synthetase PurA	24	5	6	1.2	-4.8	-2.34	0.1968	1
RVBD_0358	-	hypothetical protein	14	7	220.1	157	-63.1	-0.49	0.6609	1
RVBD_0359	-	integral membrane protein	11	11	18296.2	16716.9	-1579.4	-0.13	0.8402	1
RVBD_0360c	-	hypothetical protein	9	9	13097.4	5511.9	-7585.5	-1.25	0.1701	1
RVBD_0361	-	membrane protein	8	5	2	25.7	23.7	3.68	0.1496	1
RVBD_0362	-	Mg2+ transport transmembrane protein MgtE	16	14	30777.1	24886.5	-5890.6	-0.31	0.3997	1
RVBD_0363c	-	fructose-bisphosphate aldolase Fba	17	7	3	218.8	215.8	6.19	0.034	0.8911
RVBD_0364	-	membrane-associated protein	13	5	1270.7	333.5	-937.2	-1.93	0.4287	1
RVBD_0365c	-	hypothetical protein	20	16	29845.9	24002.2	-5843.6	-0.31	0.4372	1
RVBD_0366c	-	hypothetical protein	6	6	7884.4	7596	-288.4	-0.05	0.9118	1
RVBD_0367c	-	hypothetical protein	2	2	345.5	216.9	-128.7	-0.67	0.7623	1
RVBD_0368c	-	hypothetical protein	17	15	15892	20350.8	4458.8	0.36	0.3182	1
RVBD_0369c	-	membrane oxidoreductase	7	5	2741.7	2546.2	-195.5	-0.11	0.893	1
RVBD_0370c	-	oxidoreductase	21	17	12420.7	7093.3	-5327.4	-0.81	0.0678	1
RVBD_0371c	-	hypothetical protein	7	2	436.8	410.2	-26.6	-0.09	0.9388	1
RVBD_0372c	-	xanthine dehydrogenase accessory factor	6	6	767.3	2265.4	1498.1	1.56	0.258	1
RVBD_0373c	-	carbon-monoxide dehydrogenase large subunit	38	31	23249.5	23135	-114.4	-0.01	0.9814	1
RVBD_0374c	-	carbon-monoxide dehydrogenase small subunit	6	6	2628.6	3047.8	419.2	0.21	0.8084	1
RVBD_0375c	-	carbon-monoxide dehydrogenase medium subunit	8	7	4448.7	2582.7	-1866	-0.78	0.372	1
RVBD_0376c	-	xanthine dehydrogenase accessory factor	21	16	18306.4	14624.3	-3682.1	-0.32	0.3775	1
RVBD_0377	-	transcriptional regulator LysR-family	10	8	5739.1	5897.9	158.8	0.04	0.9316	1
RVBD_0378	-	glycine rich protein	3	3	2874.9	463.4	-2411.5	-2.63	0.1923	1
RVBD_0379	-	preprotein translocase subunit SecE2	4	4	3050.9	1793.8	-1257	-0.77	0.3612	1
RVBD_0380c	-	methyltransferase	10	8	2054.5	2187.5	133	0.09	0.9331	1
RVBD_0381c	-	hypothetical protein	17	15	34047.3	20139.2	-13908.1	-0.76	0.1759	1
RVBD_0382c	-	orotate phosphoribosyltransferase PyrE	12	3	3	0	-3	0	0.2044	1
RVBD_0383c	-	secreted protein	9	3	1801.5	980.6	-820.9	-0.88	0.6729	1
RVBD_0384c	-	endopeptidase ATP binding protein chain B ClpB	25	12	11	5.9	-5.1	-0.9	0.2543	1
RVBD_0385	-	oxidoreductase	20	18	47716.5	65221.7	17505.1	0.45	0.1038	1
RVBD_0386	-	transcriptional regulator LuxR/UhpA-family	44	37	56003.2	47167.1	-8836.1	-0.25	0.4017	1
RVBD_0387c	-	PPE family protein	26	25	27253.1	26450	-803.1	-0.04	0.8789	1
RVBD_0389	-	phosphoribosylglycinamide formyltransferase 2 PurT	9	8	7042.3	8656.4	1614.1	0.3	0.5841	1
RVBD_0390	-	hypothetical protein	8	7	11003.1	8030.2	-2972.9	-0.45	0.2136	1
RVBD_0391	-	O-succinylhomoserine sulfhydrylase MetZ	22	17	11935.1	11318.6	-616.5	-0.08	0.8626	1
RVBD_0392c	-	NADH dehydrogenase NdhA	16	13	5529.5	2420.9	-3108.6	-1.19	0.0752	1
RVBD_0393	-	13E12 repeat family protein	10	9	23684.7	21012.1	-2672.6	-0.17	0.6682	1
RVBD_0394c	-	secreted protein	10	10	9798.7	11191.4	1392.7	0.19	0.5685	1
RVBD_0395	-	hypothetical protein	8	8	7895.6	10671.3	2775.7	0.43	0.3439	1
RVBD_0396	-	hypothetical protein	6	5	2929.1	4267.5	1338.5	0.54	0.4669	1
RVBD_0397	-	13E12 repeat family protein	4	4	4844.2	4822.5	-21.7	-0.01	0.994	1
RVBD_0397A	-	hypothetical protein	8	7	4152.6	5733.5	1580.9	0.47	0.5158	1
RVBD_0398c	-	secreted protein	5	4	1426.9	2013.5	586.6	0.5	0.4611	1
RVBD_0399c	-	lipoprotein LpqK	24	20	14355.4	13773.4	-582	-0.06	0.9005	1
RVBD_0400c	-	acyl-CoA dehydrogenase FadE7	10	8	4928.4	1797.5	-3130.9	-1.46	0.0304	0.8517
RVBD_0401	-	transmembrane protein	3	1	1808.2	2008.1	199.9	0.15	0.6907	1
RVBD_0402c	-	transmembrane transporter MmpL1	55	44	70440.5	69924.5	-516	-0.01	0.9613	1
RVBD_0403c	-	membrane protein MmpS1	8	8	5922.9	5952	29.1	0.01	0.9893	1
RVBD_0404	-	fatty-acid-AMP ligase FadD30	87	39	17944.6	13892.8	-4051.7	-0.37	0.4816	1
RVBD_0405	-	polyketide synthase Pks6	124	53	42686.5	45741.2	3054.7	0.1	0.7756	1
RVBD_0406c	-	beta-lactamase like protein	14	12	3060.2	2932.9	-127.3	-0.06	0.9357	1
RVBD_0407	-	F420-dependent glucose-6-phosphate dehydrogenase Fgd1	20	17	2100	2780.9	680.9	0.41	0.4163	1
RVBD_0408	-	phosphate acetyltransferase Pta	44	36	20667.7	33444.8	12777.1	0.69	0.0474	0.9606
RVBD_0409	-	acetate kinase AckA	17	13	8576.8	9086.9	510.1	0.08	0.8498	1
RVBD_0410c	-	serine/threonine-protein kinase PknG	31	13	10	5.4	-4.6	-0.89	0.2407	1
RVBD_0411c	-	glutamine-binding lipoprotein GlnH	9	3	2	4.7	2.7	1.25	1	1
RVBD_0412c	-	membrane protein	23	9	5	7.7	2.7	0.63	0.4633	1
RVBD_0413	-	mutator protein MutT3	8	7	20453.8	27832.4	7378.5	0.44	0.4755	1
RVBD_0414c	-	thiamine-phosphate pyrophosphorylase ThiE	10	4	399.5	661.7	262.3	0.73	0.5871	1
RVBD_0415	-	glycine oxidase ThiO	12	2	2	0	-2	0.62	0.4628	1
RVBD_0416	-	thiamine biosynthesis protein ThiS	4	0	0	0	0	0	1	1
RVBD_0417	-	thiamine biosynthesis protein ThiG	16	6	3.9	4.2	0.3	0.09	1	1
RVBD_0418	-	lipoprotein aminopeptidase LpqL	28	24	15747.3	11991.7	-3755.6	-0.39	0.3117	1
RVBD_0419	-	lipoprotein peptidase LpqM	23	19	25218.3	19689.1	-5529.2	-0.36	0.3482	1
RVBD_0420c	-	transmembrane protein	9	8	7429.1	4511.5	-2917.6	-0.72	0.2822	1
RVBD_0421c	-	hypothetical protein	10	6	6217.5	2813.2	-3404.3	-1.14	0.1651	1
RVBD_0422c	-	phosphomethylpyrimidine kinase ThiD	14	3	2	2.4	0.3	0.22	1	1
RVBD_0423c	-	thiamine biosynthesis protein ThiC	22	5	67.3	337.7	270.4	2.33	0.2171	1
RVBD_0424c	-	hypothetical protein	8	7	18181.8	17039	-1142.8	-0.09	0.8775	1
RVBD_0425c	-	HAD ATPase, P-type, family IC CtpH	40	33	57668.9	53979.7	-3689.2	-0.1	0.7765	1
RVBD_0426c	-	transmembrane protein	2	2	14567.5	13605.8	-961.7	-0.1	0.8534	1
RVBD_0427c	-	exodeoxyribonuclease III protein XthA	13	11	9350.6	6571	-2779.6	-0.51	0.5123	1
RVBD_0428c	-	N-acetyltransferase	17	12	6890	7661.6	771.5	0.15	0.6705	1
RVBD_0429c	-	polypeptide deformylase Def	9	2	2	0	-2	0.59	0.4644	1
RVBD_0430	-	hypothetical protein	3	0	0	0	0	0	1	1
RVBD_0431	-	hypothetical protein	10	7	1304.1	424.7	-879.5	-1.62	0.562	1
RVBD_0432	-	periplasmic superoxide dismutase [Cu-Zn] SodC	13	13	14539.1	14284.4	-254.6	-0.03	0.9564	1	*
RVBD_0433	-	carboxylate-amine ligase	24	19	25837.9	30213.6	4375.7	0.23	0.5395	1
RVBD_0434	-	hypothetical protein	14	10	14731.1	18867.2	4136.1	0.36	0.3727	1
RVBD_0435c	-	transitional endoplasmic reticulum ATPase	23	20	33937.9	32623.6	-1314.3	-0.06	0.8534	1
RVBD_0436c	-	CDP-diacylglycerol-serine O-phosphatidyltransferase PssA	17	13	142.4	93.2	-49.2	-0.61	0.5587	1
RVBD_0437c	-	phosphatidylserine decarboxylase Psd	8	5	914.6	31	-883.6	-4.88	0.4808	1
RVBD_0438c	-	molybdopterin biosynthesis protein MoeA2	14	12	8537	5881.3	-2655.7	-0.54	0.6115	1
RVBD_0439c	-	oxidoreductase	19	18	18772.4	18394.3	-378.1	-0.03	0.9248	1
RVBD_0440	-	chaperonin 2 GroEL2	13	2	2	0	-2	0.59	0.4584	1
RVBD_0441c	-	hypothetical protein	9	8	4425.8	3887.2	-538.6	-0.19	0.744	1
RVBD_0442c	-	PPE family protein PPE10	24	19	16021.3	16266.3	245	0.02	0.9659	1
RVBD_0443	-	hypothetical protein	15	11	17436.4	17485.7	49.3	0	0.9939	1
RVBD_0444c	-	anti-sigma factor RskA	9	8	3620.9	4112.3	491.4	0.18	0.7399	1
RVBD_0445c	-	RNA polymerase sigma factor SigK	10	10	16577.9	13800.1	-2777.7	-0.26	0.535	1
RVBD_0446c	-	transmembrane protein	17	16	18980.4	20929.2	1948.8	0.14	0.6723	1
RVBD_0447c	-	cyclopropane-fatty-acyl-phospholipid synthase UfaA1	27	24	39675.6	37402.4	-2273.1	-0.09	0.7961	1
RVBD_0448c	-	hypothetical protein	16	15	21581.3	20499.6	-1081.8	-0.07	0.7948	1
RVBD_0449c	-	hypothetical protein	23	23	32288.5	28913.5	-3375	-0.16	0.604	1
RVBD_0450c	-	transmembrane transporter MmpL4	84	56	17386.6	12903	-4483.6	-0.43	0.4712	1
RVBD_0451c	-	membrane protein MmpS4	15	5	2283.8	1537.8	-746	-0.57	0.6463	1
RVBD_0452	-	transcriptional regulator	10	8	9714.3	12362.7	2648.4	0.35	0.5102	1
RVBD_0453	-	PPE family protein PPE11	23	21	26317.8	26966	648.1	0.04	0.9009	1
RVBD_0454	-	hypothetical protein	7	6	9050.4	9526.3	476	0.07	0.8525	1
RVBD_0455c	-	hypothetical protein	11	3	2	1.2	-0.8	-0.75	1	1
RVBD_0456A	-	toxin MazF1	5	5	6892	8181.2	1289.2	0.25	0.7159	1
RVBD_0456B	-	antitoxin MazE1	13	13	14028.6	16817.1	2788.5	0.26	0.4417	1
RVBD_0456c	-	enoyl-CoA hydratase EchA2	11	10	10947	10091.3	-855.7	-0.12	0.7971	1
RVBD_0457c	-	prolyl oligopeptidase	38	27	29217.7	22581.9	-6635.8	-0.37	0.4258	1
RVBD_0458	-	aldehyde dehydrogenase (NAD+)	23	21	43587.7	35060.8	-8526.9	-0.31	0.4143	1
RVBD_0459	-	hypothetical protein	6	5	3356.9	2977.7	-379.2	-0.17	0.6837	1
RVBD_0460	-	hydrophobic protein	3	3	763	1229	466	0.69	0.2775	1
RVBD_0461	-	transmembrane protein	17	17	23985.5	23190.8	-794.7	-0.05	0.9188	1
RVBD_0462	-	dihydrolipoamide dehydrogenase LpdC	27	5	5.9	0	-5.9	-0.97	0.0451	0.958	*
RVBD_0463	-	membrane protein	4	4	4030.4	4867.1	836.6	0.27	0.6877	1
RVBD_0464c	-	alkylhydroperoxidase AhpD family core domain-containing protein	15	11	22151.6	17447	-4704.6	-0.34	0.3802	1	*
RVBD_0465c	-	transcriptional regulator	27	26	10882.7	4071.5	-6811.2	-1.42	0.0026	0.2595
RVBD_0466	-	hypothetical protein	8	7	11516.5	7759.9	-3756.7	-0.57	0.0986	1
RVBD_0467	-	isocitrate lyase Icl	19	6	570.9	612.8	41.9	0.1	0.9606	1
RVBD_0468	-	3-hydroxybutyryl-CoA dehydrogenase FadB	13	12	2974.4	2183.1	-791.3	-0.45	0.3701	1
RVBD_0469	-	mycolic acid synthase UmaA	25	18	11027	13160.4	2133.4	0.26	0.5986	1
RVBD_0470A	-	mycolic acid synthase PcaA	11	10	17722	17195.5	-526.4	-0.04	0.9263	1
RVBD_0470c	-	mycolic acid synthase PcaA	12	9	34.5	142.6	108.1	2.05	0.1363	1
RVBD_0471c	-	hypothetical protein	12	10	31127	22798	-8329	-0.45	0.6212	1
RVBD_0472c	-	transcriptional regulator TetR-family	10	8	13487.7	4015.7	-9472	-1.75	0.0048	0.3459
RVBD_0473	-	transmembrane protein	16	15	59003.7	64943.8	5940	0.14	0.7732	1
RVBD_0474	-	transcriptional regulator	8	8	18480.1	14008.1	-4472	-0.4	0.525	1
RVBD_0475	-	iron-regulated heparin binding hemagglutinin HbhA	10	10	6791	6550.8	-240.1	-0.05	0.9534	1
RVBD_0476	-	transmembrane protein	7	6	9455.6	7460.7	-1994.9	-0.34	0.5831	1
RVBD_0477	-	secreted protein	6	6	18410.4	20046	1635.5	0.12	0.8433	1
RVBD_0478	-	deoxyribose-phosphate aldolase DeoC	3	2	1834.4	3564.8	1730.3	0.96	0.029	0.8479
RVBD_0479c	-	membrane protein	13	2	11.8	60.4	48.6	2.36	0.7261	1
RVBD_0480c	-	hydrolase	16	12	20095.5	16297.3	-3798.3	-0.3	0.4406	1
RVBD_0481c	-	hypothetical protein	12	12	20849	17899.7	-2949.3	-0.22	0.607	1
RVBD_0482	-	UDP-N-acetylenolpyruvoylglucosamine reductase MurB	14	4	7839.5	3749.7	-4089.7	-1.06	0.4014	1
RVBD_0483	-	lipoprotein LprQ	30	27	38310.8	27656.5	-10654.3	-0.47	0.1272	1
RVBD_0484c	-	oxidoreductase	10	7	8310.5	8016.4	-294.1	-0.05	0.9013	1
RVBD_0485	-	transcriptional regulator	23	20	18933	16190.4	-2742.6	-0.23	0.5123	1
RVBD_0486	-	glycosyltransferase MshA	13	5	1587.5	545.9	-1041.6	-1.54	0.4425	1
RVBD_0487	-	hypothetical protein	10	10	6555.4	7665.1	1109.7	0.23	0.5114	1
RVBD_0488	-	l-lysine exporter	9	9	6019.8	5567.1	-452.7	-0.11	0.8827	1
RVBD_0489	-	phosphoglycerate mutase Gpm1	12	8	1345.3	1167.1	-178.2	-0.21	0.8819	1
RVBD_0490	-	two-component system sensor histidine kinase SenX3	16	14	4811.7	5827	1015.4	0.28	0.6157	1
RVBD_0491	-	two-component system sensory transduction protein RegX3	10	8	17082.8	10770.8	-6312	-0.67	0.3918	1
RVBD_0492A	-	hypothetical protein	4	4	5341.3	4746.8	-594.5	-0.17	0.7362	1
RVBD_0492c	-	oxidoreductase	18	15	21098.6	20458.7	-639.9	-0.04	0.8984	1
RVBD_0493c	-	hypothetical protein	19	17	16811.6	17680.1	868.5	0.07	0.8783	1
RVBD_0494	-	transcriptional regulator GntR-family	8	8	3448.3	6767	3318.7	0.97	0.0752	1
RVBD_0495c	-	hypothetical protein	13	7	1704.6	3482.4	1777.8	1.03	0.497	1
RVBD_0496	-	exopolyphosphatase	8	7	8637.8	4816.3	-3821.4	-0.84	0.6026	1
RVBD_0497	-	transmembrane protein	15	13	4819.7	13541.8	8722.1	1.49	0.0067	0.4361
RVBD_0498	-	hypothetical protein	12	11	11600.8	13422.3	1821.5	0.21	0.5913	1
RVBD_0499	-	hypothetical protein	6	6	5526.3	5349.5	-176.8	-0.05	0.9411	1
RVBD_0500	-	pyrroline-5-carboxylate reductase ProC	13	5	3	3.8	0.8	0.35	0.6803	1
RVBD_0500A	-	excisionase	5	4	2908	3693.5	785.4	0.34	0.6527	1
RVBD_0500B	-	hypothetical protein	2	2	193.3	431	237.8	1.16	0.3921	1
RVBD_0501	-	UDP-glucose 4-epimerase GalE2	26	20	15112.1	9390.9	-5721.2	-0.69	0.1827	1
RVBD_0502	-	hypothetical protein	19	15	22029.4	13924.4	-8105	-0.66	0.1465	1
RVBD_0503c	-	cyclopropane mycolic acid synthase 2 CmaA2	20	20	107529	66933.8	-40595.1	-0.68	0.1071	1
RVBD_0504c	-	hypothetical protein	8	6	18.7	1.3	-17.4	-3.83	0.0288	0.8479
RVBD_0505c	-	phosphoserine phosphatase SerB1	22	9	2529.8	1850.1	-679.6	-0.45	0.5081	1
RVBD_0506	-	membrane protein MmpS2	9	8	10809.5	12236.5	1426.9	0.18	0.769	1
RVBD_0507	-	transmembrane transporter MmpL2	82	53	52061.6	53469.1	1407.5	0.04	0.8783	1
RVBD_0508	-	hypothetical protein	9	8	8325.7	6401.8	-1923.9	-0.38	0.5605	1
RVBD_0509	-	glutamyl-tRNA reductase HemA	22	10	5.9	6	0.1	0.03	0.9986	1
RVBD_0510	-	porphobilinogen deaminase HemC	13	5	3.9	1.3	-2.6	-1.59	0.299	1
RVBD_0511	-	uroporphyrin-III C-methyltransferase HemD	19	10	10	5.1	-4.9	-0.97	0.1856	1
RVBD_0512	-	delta-aminolevulinic acid dehydratase HemB	22	8	1502	1241.2	-260.8	-0.28	0.7668	1
RVBD_0513	-	transmembrane protein	7	6	6631.6	4889.8	-1741.9	-0.44	0.6637	1
RVBD_0514	-	transmembrane protein	2	1	3096.8	4174.9	1078.2	0.43	0.5055	1
RVBD_0515	-	13E12 repeat family protein	19	16	8971	11312.5	2341.5	0.33	0.5715	1
RVBD_0516c	-	anti-anti-sigma factor	9	9	14236.1	10354.7	-3881.4	-0.46	0.4359	1
RVBD_0517	-	membrane acyltransferase	21	21	50088.1	48440.4	-1647.8	-0.05	0.8741	1
RVBD_0518	-	exported protein	12	10	20461.4	23277.9	2816.5	0.19	0.7465	1
RVBD_0519c	-	mycolyltransferase II	9	8	6639.7	6825.6	185.9	0.04	0.9445	1
RVBD_0520	-	methyltransferase	5	5	8798.6	10483.6	1685	0.25	0.6791	1
RVBD_0521	-	methyltransferase	5	4	8305.5	4924.7	-3380.8	-0.75	0.1928	1
RVBD_0522	-	GABA permease GabP	23	17	21328.1	23975.1	2646.9	0.17	0.7198	1
RVBD_0523c	-	deazaflavin-dependent nitroreductase	9	8	8875.9	5963.5	-2912.4	-0.57	0.5546	1
RVBD_0524	-	glutamate-1-semialdehyde 2,1-aminomutase HemL	21	8	10.8	2.4	-8.5	-2.2	0.0133	0.6031
RVBD_0525	-	phosphoglycerate mutase	10	3	720	731	11	0.02	0.9663	1
RVBD_0526	-	thioredoxin	7	1	1	0	-1	1.56	1	1
RVBD_0527	-	cytochrome C-type biogenesis protein CcdA	5	0	0	0	0	0	1	1
RVBD_0528	-	cytochrome C biogenesis protein	16	6	6	3.7	-2.4	-0.72	0.5224	1
RVBD_0529	-	cytochrome C-type biogenesis protein CcsA	18	5	7	0	-7	-1.22	0.0143	0.6342
RVBD_0530	-	hypothetical protein	18	14	31351.4	21724.7	-9626.7	-0.53	0.0891	1
RVBD_0530Ac	-	hypothetical protein	3	3	2439.1	1357.4	-1081.7	-0.85	0.4886	1
RVBD_0531	-	membrane protein	4	4	14.7	199.6	184.9	3.76	0.1854	1
RVBD_0532	-	PE-PGRS family protein PE_PGRS6	21	18	15408.4	10786.8	-4621.6	-0.51	0.2016	1
RVBD_0533c	-	3-oxoacyl-[acyl-carrier-protein] synthase 3 FabH	16	12	21286.9	19310.9	-1976	-0.14	0.8007	1
RVBD_0534c	-	1,4-dihydroxy-2-naphthoate octaprenyltransferase MenA	11	4	3.9	0	-3.9	-0.4	0.0904	1
RVBD_0535	-	5'-methylthioadenosine phosphorylase Pnp	9	8	12962.5	7332.3	-5630.2	-0.82	0.2485	1
RVBD_0536	-	UDP-glucose 4-epimerase GalE3	12	10	3384.7	3345.2	-39.5	-0.02	0.9801	1
RVBD_0537c	-	membrane protein	19	17	27948.1	23486.5	-4461.6	-0.25	0.5227	1
RVBD_0538	-	membrane protein	15	14	10222.9	10833.7	610.8	0.08	0.8707	1
RVBD_0539	-	glycosyltransferase	6	3	5507.6	3678	-1829.6	-0.58	0.6296	1
RVBD_0540	-	hypothetical protein	11	8	8410.9	4075.3	-4335.6	-1.05	0.089	1
RVBD_0541c	-	integral membrane protein	18	11	2508.9	130.4	-2378.5	-4.27	0.0037	0.2987
RVBD_0542c	-	O-succinylbenzoic acid-CoA ligase MenE	14	4	6	4.1	-1.9	-0.55	0.5393	1
RVBD_0543c	-	hypothetical protein	2	0	0	0	0	0	1	1
RVBD_0544c	-	transmembrane protein	6	5	3203.7	2141	-1062.7	-0.58	0.368	1
RVBD_0545c	-	inorganic phosphate transporter integral membrane protein PitA	14	13	4313.1	1966.1	-2347	-1.13	0.0673	1
RVBD_0546c	-	lactoylglutathione lyase	8	7	3728	2743.1	-984.9	-0.44	0.5238	1
RVBD_0547c	-	oxidoreductase	10	10	25261.7	14839.6	-10422.1	-0.77	0.1579	1
RVBD_0548c	-	1,4-Dihydroxy-2-naphthoyl-CoA synthase	12	4	851.5	419.2	-432.3	-1.02	0.6022	1
RVBD_0549c	-	toxin VapC3	4	4	5037.8	3825.4	-1212.4	-0.4	0.5821	1
RVBD_0550c	-	antitoxin VapB3	3	2	6512.1	6356	-156.1	-0.04	0.9849	1
RVBD_0551c	-	fatty-acid-CoA ligase FadD8	32	30	38584.2	39932	1347.8	0.05	0.8431	1
RVBD_0552	-	hypothetical protein	19	14	14238.2	15669.1	1430.9	0.14	0.676	1
RVBD_0553	-	muconate cycloisomerase MenC	12	5	1281.9	1637.7	355.8	0.35	0.7074	1
RVBD_0554	-	peroxidase BpoC	14	12	97.9	290.4	192.5	1.57	0.0018	0.227	*
RVBD_0555	-	bifunctional menaquinone biosynthesis protein MenD	15	4	4	1.2	-2.8	-1.76	0.3043	1
RVBD_0556	-	transmembrane protein	13	5	2.9	5.6	2.7	0.94	0.4905	1
RVBD_0557	-	mannosyltransferase MgtA	15	11	3124.2	3913.1	788.9	0.32	0.614	1
RVBD_0558	-	ubiquinone/menaquinone biosynthesis methyltransferase MenH	14	5	2	3.8	1.8	0.94	0.3888	1
RVBD_0559c	-	secreted protein	7	7	15493.6	11131.1	-4362.6	-0.48	0.5156	1
RVBD_0560c	-	benzoquinone methyltransferase	15	9	7024.9	8330.9	1306	0.25	0.6754	1
RVBD_0561c	-	oxidoreductase	18	5	8.9	46	37.1	2.37	0.1671	1
RVBD_0562	-	polyprenyl-diphosphate synthase GrcC1	15	4	2347.5	861.4	-1486	-1.45	0.4094	1
RVBD_0563	-	protease transmembrane protein heat shock protein HtpX	11	8	142.6	886.4	743.8	2.64	0.0185	0.675
RVBD_0564c	-	glycerol-3-phosphate dehydrogenase GpdA1	11	11	15261.6	14258.6	-1003	-0.1	0.7472	1
RVBD_0565c	-	monooxygenase	36	34	36372.6	44447	8074.3	0.29	0.2798	1
RVBD_0566c	-	hypothetical protein	5	4	7421.7	6982.6	-439.1	-0.09	0.904	1
RVBD_0567	-	methyltransferase	20	19	33041.8	22463.5	-10578.3	-0.56	0.1921	1
RVBD_0568	-	cytochrome P450 135B1 Cyp135B1	12	11	12389.3	10046	-2343.3	-0.3	0.4753	1
RVBD_0569	-	hypothetical protein	4	4	10540.6	5803.6	-4737	-0.86	0.3279	1
RVBD_0570	-	ribonucleoside-diphosphate reductase NrdZ	37	31	33950.6	32051.8	-1898.8	-0.08	0.7593	1
RVBD_0571c	-	hypothetical protein	13	11	5172.9	5580.5	407.6	0.11	0.8243	1
RVBD_0572c	-	hypothetical protein	7	7	10383	11145.7	762.8	0.1	0.8503	1
RVBD_0573c	-	nicotinate phosphoribosyltransferase PncB2	16	14	13949.8	12676.1	-1273.7	-0.14	0.7129	1
RVBD_0574c	-	poly-gamma-glutamate synthesis protein (capsule biosynthesis protein)	20	18	24843.1	26069.2	1226.1	0.07	0.8081	1
RVBD_0575c	-	oxidoreductase	14	14	19272.2	16416.4	-2855.8	-0.23	0.5646	1
RVBD_0576	-	transcriptional regulator ArsR-family	20	18	9415.5	8796.5	-619	-0.1	0.8125	1
RVBD_0577	-	antigen Cfp30B	14	13	18004.5	23556.6	5552.2	0.39	0.3883	1
RVBD_0578c	-	PE-PGRS family protein PE_PGRS7	27	20	8721.8	7661.6	-1060.1	-0.19	0.6756	1
RVBD_0579	-	hypothetical protein	15	12	12173.6	15059.8	2886.2	0.31	0.4009	1
RVBD_0580c	-	hypothetical protein	9	8	7352.5	8029	676.5	0.13	0.7731	1
RVBD_0581	-	antitoxin VapB26	4	4	4313.4	9680.6	5367.1	1.17	0.0191	0.6762
RVBD_0582	-	toxin VapC26	10	9	14266.1	8219.2	-6046.9	-0.8	0.6063	1
RVBD_0583c	-	lipoprotein LpqN	7	7	11995.6	12753.8	758.2	0.09	0.8486	1
RVBD_0584	-	exported protein	62	54	82015.5	69626.9	-12388.6	-0.24	0.3329	1
RVBD_0585c	-	integral membrane protein	41	30	31250.9	26262.1	-4988.9	-0.25	0.568	1
RVBD_0586	-	transcriptional regulator Mce2R	12	6	2192.2	2100	-92.2	-0.06	0.9703	1
RVBD_0587	-	ABC transporter permease YrbE2A	13	11	11523.2	6751.9	-4771.4	-0.77	0.2152	1
RVBD_0588	-	ABC transporter permease YrbE2B	16	12	11031.6	13571.5	2539.9	0.3	0.5552	1
RVBD_0589	-	MCE-family protein Mce2A	27	22	15166.9	13427.4	-1739.5	-0.18	0.7961	1
RVBD_0590	-	MCE-family protein Mce2B	11	8	2275.3	3396.1	1120.8	0.58	0.3495	1
RVBD_0590A	-	ABC transporter substrate-binding protein	7	5	3095.1	4410.5	1315.4	0.51	0.1993	1
RVBD_0591	-	MCE-family protein Mce2C	22	19	23742.9	15006.6	-8736.3	-0.66	0.1482	1
RVBD_0592	-	MCE-family protein Mce2D	29	20	19953.4	11134.4	-8819.1	-0.84	0.1712	1
RVBD_0593	-	MCE-family lipoprotein LprL	19	15	8530.4	12362.2	3831.7	0.54	0.1106	1
RVBD_0594	-	MCE-family protein Mce2F	30	28	49874.2	47282.7	-2591.5	-0.08	0.8187	1
RVBD_0595c	-	toxin VapC4	8	6	5131.9	5943.6	811.7	0.21	0.5941	1
RVBD_0596c	-	antitoxin VapB4	6	3	1086.9	217.4	-869.5	-2.32	0.1883	1
RVBD_0597c	-	ATPase	13	11	9220.4	7412.3	-1808.1	-0.31	0.5149	1
RVBD_0598c	-	toxin VapC27	7	6	5303.6	6166.2	862.6	0.22	0.629	1
RVBD_0599c	-	antitoxin VapB27	6	4	2155.8	1221	-934.9	-0.82	0.5159	1
RVBD_0600c	-	two-component system sensor histidine kinase	3	3	3057.4	3609.7	552.2	0.24	0.6568	1
RVBD_0601c	-	two-component system sensor histidine kinase	4	3	5027.4	3290.8	-1736.6	-0.61	0.4417	1
RVBD_0602c	-	two-component system transcriptional regulator TcrA	11	10	10021.2	7050.6	-2970.7	-0.51	0.4658	1
RVBD_0603	-	exported protein	2	1	1528.5	940.5	-588	-0.7	0.3016	1
RVBD_0604	-	lipoprotein LpqO	7	6	10276.6	7469.8	-2806.7	-0.46	0.4415	1
RVBD_0605	-	resolvase	10	9	19056	22290.3	3234.3	0.23	0.5686	1
RVBD_0606	-	transposase	9	6	8501.9	6358.1	-2143.7	-0.42	0.4179	1
RVBD_0607	-	hypothetical protein	1	1	772.3	965	192.7	0.32	0.604	1
RVBD_0608	-	antitoxin VapB28	2	1	223.5	303.1	79.6	0.44	0.3985	1
RVBD_0609	-	toxin VapC28	7	6	3498.1	2897.2	-600.9	-0.27	0.8057	1
RVBD_0609A	-	hypothetical protein	2	2	2124.7	1116.6	-1008.1	-0.93	0.1085	1
RVBD_0610c	-	hypothetical protein	11	9	10635	10068.7	-566.4	-0.08	0.8695	1
RVBD_0611c	-	hypothetical protein	12	10	3518.4	7145.3	3626.9	1.02	0.1445	1
RVBD_0612	-	hypothetical protein	6	6	12897	12309.3	-587.7	-0.07	0.8576	1
RVBD_0613c	-	hypothetical protein	16	14	16691.8	20419.8	3728	0.29	0.5293	1
RVBD_0614	-	galactose-1-phosphate uridylyltransferase	14	13	9865.8	11636.9	1771.1	0.24	0.502	1
RVBD_0615	-	membrane protein	5	5	4420.1	9196.2	4776.1	1.06	0.0614	1
RVBD_0616A	-	antitoxin VapB29	4	4	849.4	869.9	20.6	0.03	0.9677	1
RVBD_0616c	-	hypothetical protein	6	5	1554.1	1903.2	349.2	0.29	0.7253	1
RVBD_0617	-	toxin VapC29	3	3	2624.3	3516.2	891.9	0.42	0.6549	1
RVBD_0618	-	galactose-1-phosphate uridylyltransferase GalTa	9	7	3267.5	3039.8	-227.6	-0.1	0.8687	1
RVBD_0619	-	galactose-1-phosphate uridylyltransferase GalTb	9	5	1694.3	1829.7	135.3	0.11	0.8332	1
RVBD_0620	-	galactokinase GalK	9	8	3339.1	2094.4	-1244.7	-0.67	0.4493	1
RVBD_0621	-	membrane protein	9	8	13639	11627.3	-2011.7	-0.23	0.7807	1
RVBD_0622	-	membrane protein	13	9	8136.9	8878.9	742.1	0.13	0.8635	1
RVBD_0623	-	antitoxin VapB30	3	2	5599.9	2377.5	-3222.3	-1.24	0.2418	1
RVBD_0624	-	toxin VapC30	7	7	6663.2	4124.4	-2538.8	-0.69	0.2991	1
RVBD_0625c	-	TVP38/TMEM64 family membrane protein	10	8	13614.3	8579	-5035.3	-0.67	0.3487	1
RVBD_0626	-	antitoxin VapB5	4	2	970.5	1252.4	281.9	0.37	0.4829	1
RVBD_0627	-	toxin VapC5	1	0	0	0	0	0	1	1
RVBD_0628c	-	hypothetical protein	4	4	6384.6	5758.3	-626.3	-0.15	0.8398	1
RVBD_0629c	-	exonuclease V alpha chain RecD	16	14	3254	7359	4104.9	1.18	0.0444	0.9553
RVBD_0630c	-	exonuclease V beta chain RecB	34	27	15122.5	20795.5	5673	0.46	0.1103	1
RVBD_0631c	-	exonuclease V gamma chain RecC	19	14	16999.7	11942.3	-5057.4	-0.51	0.3874	1
RVBD_0632c	-	enoyl-CoA hydratase EchA3	13	12	20998.5	19078.2	-1920.3	-0.14	0.8133	1
RVBD_0633c	-	exported protein	13	12	15959.8	16086	126.3	0.01	0.9813	1
RVBD_0634A	-	hypothetical protein	6	6	891.5	1440.5	549	0.69	0.5512	1
RVBD_0634B	-	50S ribosomal protein L33 RpmG2	4	1	0	2.6	2.6	-0.19	1	1
RVBD_0634c	-	hydroxyacylglutathione hydrolase	13	11	3690.4	4918.2	1227.8	0.41	0.2393	1
RVBD_0635	-	(3R)-hydroxyacyl-ACP dehydratase subunit HadA	14	5	6	0	-6	-1	0.0112	0.5318
RVBD_0636	-	(3R)-hydroxyacyl-ACP dehydratase subunit HadB	8	3	138.1	9.9	-128.2	-3.81	0.3568	1
RVBD_0637	-	(3R)-hydroxyacyl-ACP dehydratase subunit HadC	8	3	216.5	244.9	28.3	0.18	0.8724	1
RVBD_0638	-	preprotein translocase subunit SecE1	9	4	3	3.7	0.7	0.28	0.6835	1
RVBD_0639	-	transcription antitermination protein NusG	13	3	2	1.3	-0.7	-0.61	1	1
RVBD_0640	-	50S ribosomal protein L11 RplK	6	3	3.9	32.8	28.9	3.06	0.1522	1
RVBD_0641	-	50S ribosomal protein L1 RplA	8	3	1432.5	1468.9	36.5	0.04	0.9781	1
RVBD_0642c	-	methoxy mycolic acid synthase 4 MmaA4	18	17	17736.7	24462.9	6726.2	0.46	0.364	1
RVBD_0643c	-	methoxy mycolic acid synthase 3 MmaA3	22	20	53380.1	30568.5	-22811.6	-0.8	0.0433	0.9446
RVBD_0644c	-	methoxy mycolic acid synthase 2 MmaA2	11	11	91368.3	82723.7	-8644.6	-0.14	0.693	1
RVBD_0645c	-	methoxy mycolic acid synthase 1 MmaA1	20	20	99853.7	110136	10282	0.14	0.4616	1
RVBD_0646c	-	lipase/esterase LipG	10	8	24975.5	14338.8	-10636.7	-0.8	0.1245	1
RVBD_0647c	-	hypothetical protein	15	7	5617.1	5573.9	-43.2	-0.01	0.9874	1
RVBD_0648	-	alpha-mannosidase	38	34	58294	53380.4	-4913.6	-0.13	0.641	1
RVBD_0649	-	malonyl CoA-acyl carrier protein transacylase FabD2	4	4	1410.1	2551.9	1141.7	0.86	0.4367	1
RVBD_0650	-	glucokinase	6	6	11144.1	8631.5	-2512.7	-0.37	0.4009	1
RVBD_0651	-	50S ribosomal protein L10 RplJ	6	0	0	0	0	0	1	1
RVBD_0652	-	50S ribosomal protein L7/L12 RplL	1	1	4676.9	3857.7	-819.3	-0.28	0.6039	1
RVBD_0653c	-	transcriptional regulator TetR-family	10	8	12515.8	11436.8	-1079	-0.13	0.7977	1
RVBD_0654	-	oxidoreductase	27	27	69864.8	56630.2	-13234.7	-0.3	0.4408	1
RVBD_0655	-	ribonucleotide-transport ABC transporter ATP-binding protein Mkl	15	12	20321.7	9284.6	-11037	-1.13	0.0099	0.5057
RVBD_0656c	-	toxin VapC6	4	4	23227.9	8706.4	-14521.5	-1.42	0.4562	1
RVBD_0657c	-	antitoxin VapB6	1	1	3020.9	651.7	-2369.2	-2.21	0.1982	1
RVBD_0658c	-	integral membrane protein	17	13	8089.2	7886.9	-202.3	-0.04	0.9263	1
RVBD_0659c	-	toxin MazF2	4	4	3435	5569.7	2134.7	0.7	0.3012	1
RVBD_0660c	-	antitoxin MazE2	2	2	2007.6	798.4	-1209.3	-1.33	0.1255	1
RVBD_0661c	-	toxin VapC7	5	5	5620.7	9302.9	3682.2	0.73	0.2922	1
RVBD_0662c	-	antitoxin VapB7	1	1	858	1452.5	594.6	0.76	0.2978	1
RVBD_0663	-	arylsulfatase AtsD	47	42	29125.8	29850	724.2	0.04	0.9014	1
RVBD_0664	-	antitoxin VapB8	3	3	1875.8	2502	626.2	0.42	0.6741	1
RVBD_0665	-	toxin VapC8	5	4	2614.8	2560.6	-54.2	-0.03	0.9727	1
RVBD_0666	-	membrane protein	0	0	0	0	0	0	1	1
RVBD_0667	-	DNA-directed RNA polymerase RpoB	39	6	3	4.7	1.7	0.66	0.4147	1
RVBD_0668	-	DNA-directed RNA polymerase RpoC	52	15	7048.4	3424.2	-3624.2	-1.04	0.075	1
RVBD_0669c	-	hydrolase	37	31	49074.3	35118.3	-13956	-0.48	0.0644	1
RVBD_0670	-	endonuclease IV End	5	5	11237.3	9139.2	-2098.2	-0.3	0.7321	1
RVBD_0671	-	lipoprotein LpqP	13	13	15592.1	12213.3	-3378.8	-0.35	0.4836	1
RVBD_0672	-	acyl-CoA dehydrogenase FadE8	27	23	15811.2	20569.6	4758.4	0.38	0.2686	1
RVBD_0673	-	enoyl-CoA hydratase EchA4	10	7	7581.7	8579	997.3	0.18	0.7358	1
RVBD_0674	-	phenylacetic acid degradation operon negative regulatory protein	7	4	156.6	155	-1.6	-0.01	0.9841	1
RVBD_0675	-	enoyl-CoA hydratase EchA5	5	5	880.4	477.9	-402.6	-0.88	0.4739	1
RVBD_0676c	-	transmembrane transporter MmpL5	32	30	37161.1	45063.8	7902.7	0.28	0.3454	1
RVBD_0677c	-	membrane protein MmpS5	6	5	9336.6	8355.8	-980.8	-0.16	0.7716	1
RVBD_0678	-	hypothetical protein	5	4	2905	3759.5	854.5	0.37	0.3984	1
RVBD_0679c	-	threonine rich protein	6	5	3563.1	5532.8	1969.7	0.63	0.1517	1
RVBD_0680c	-	transmembrane protein	3	3	4006.7	5651.5	1644.7	0.5	0.4792	1
RVBD_0681	-	transcriptional regulator TetR-family	13	12	5512.6	4877.9	-634.7	-0.18	0.7017	1
RVBD_0682	-	30S ribosomal protein S12 RpsL	8	3	4	0	-4	-0.41	0.0813	1
RVBD_0683	-	30S ribosomal protein S7 RpsG	5	1	0	1.2	1.2	-1.34	1	1
RVBD_0684	-	elongation factor G FusA1	34	7	7	2.6	-4.4	-1.42	0.3065	1
RVBD_0685	-	iron-regulated elongation factor TU Tuf	12	5	95.3	262.1	166.8	1.46	0.4743	1
RVBD_0686	-	membrane protein	12	11	12494.5	14489.3	1994.8	0.21	0.5721	1
RVBD_0687	-	SDR family oxidoreductase	17	13	7550.5	8003.1	452.6	0.08	0.8721	1
RVBD_0688	-	oxidoreductase	19	17	22975	17669.9	-5305.1	-0.38	0.3416	1
RVBD_0689c	-	hypothetical protein	4	2	8770.3	7497.8	-1272.4	-0.23	0.5792	1
RVBD_0690c	-	hypothetical protein	17	12	14506.1	14469.9	-36.2	0	0.9936	1
RVBD_0691A	-	mycofactocin protein	4	3	1102.3	2359.7	1257.4	1.1	0.271	1
RVBD_0691c	-	mycofactocin system transcriptional regulator	9	7	2343.7	3124.4	780.7	0.41	0.3815	1
RVBD_0692	-	mycofactocin system RPExFGAL protein	7	7	8509.6	10153.6	1644	0.25	0.6529	1
RVBD_0693	-	coenzyme PQQ synthesis protein E PqqE	19	16	6660.9	7444.1	783.1	0.16	0.6015	1
RVBD_0694	-	l-lactate dehydrogenase LldD1	18	11	3177.2	2443.4	-733.8	-0.38	0.5334	1
RVBD_0695	-	creatinine amidohydrolase, mycofactocin system protein	12	9	2591.6	5598.7	3007.1	1.11	0.1591	1
RVBD_0696	-	mycofactocin system glycosyltransferase	27	22	15811.9	12266.3	-3545.5	-0.37	0.3536	1
RVBD_0697	-	dehydrogenase	27	15	4097.2	3743.8	-353.4	-0.13	0.83	1
RVBD_0698	-	hypothetical protein	12	7	1323.6	1424.4	100.8	0.11	0.8916	1
RVBD_0699	-	hypothetical protein	3	3	342.4	511.4	169	0.58	0.615	1
RVBD_0700	-	30S ribosomal protein S10 RpsJ	7	5	1294.6	1026.9	-267.7	-0.33	0.8337	1
RVBD_0701	-	50S ribosomal protein L3 RplC	16	4	1	3.8	2.8	1.91	0.2216	1
RVBD_0702	-	50S ribosomal protein L4 RplD	11	2	2	1.6	-0.4	-0.31	1	1
RVBD_0703	-	50S ribosomal protein L23 RplW	5	2	2	0	-2	0.6	0.4483	1
RVBD_0704	-	50S ribosomal protein L2 RplB	18	5	4	2.6	-1.4	-0.62	0.6601	1
RVBD_0705	-	30S ribosomal protein S19 RpsS	2	0	0	0	0	0	1	1
RVBD_0706	-	50S ribosomal protein L22 RplV	9	3	2	1.2	-0.8	-0.77	1	1
RVBD_0707	-	30S ribosomal protein S3 RpsC	14	3	2	1.2	-0.8	-0.75	1	1
RVBD_0708	-	50S ribosomal protein L16 RplP	10	4	8	0	-8	-1.42	0.0047	0.3449
RVBD_0709	-	50S ribosomal protein L29 RpmC	4	1	1	0	-1	1.56	1	1
RVBD_0710	-	30S ribosomal protein S17 RpsQ	12	4	2088.3	1730.1	-358.2	-0.27	0.8067	1
RVBD_0711	-	arylsulfatase AtsA	46	40	56953.2	61346.9	4393.7	0.11	0.6512	1
RVBD_0712	-	hypothetical protein	20	13	12366.1	11314.2	-1051.9	-0.13	0.7927	1
RVBD_0713	-	transmembrane protein	20	18	34964.6	29940.2	-5024.4	-0.22	0.6382	1
RVBD_0714	-	50S ribosomal protein L14 RplN	5	2	1	1.3	0.3	0.37	1	1
RVBD_0715	-	50S ribosomal protein L24 RplX	5	1	0	1.3	1.3	-1.19	1	1
RVBD_0716	-	50S ribosomal protein L5 RplE	4	2	2	0	-2	0.62	0.4504	1
RVBD_0717	-	30S ribosomal protein S14 RpsN1	3	1	1	0	-1	1.58	1	1
RVBD_0718	-	30S ribosomal protein S8 RpsH	10	4	3	4.1	1.1	0.46	0.677	1
RVBD_0719	-	50S ribosomal protein L6 RplF	16	2	1	1.3	0.3	0.37	1	1
RVBD_0720	-	50S ribosomal protein L18 RplR	4	2	2	0	-2	0.62	0.4596	1
RVBD_0721	-	30S ribosomal protein S5 RpsE	13	6	9	5.5	-3.5	-0.71	0.5216	1
RVBD_0722	-	50S ribosomal protein L30 RpmD	2	1	0	1.2	1.2	-1.34	1	1
RVBD_0723	-	50S ribosomal protein L15 RplO	3	3	193.9	641.4	447.6	1.73	0.3299	1
RVBD_0724	-	signal peptide peptidase SppA	31	23	19308.1	17642.3	-1665.8	-0.13	0.663	1
RVBD_0725c	-	hypothetical protein	15	11	8208	5043.1	-3164.9	-0.7	0.2817	1
RVBD_0726c	-	s-adenosylmethionine-dependent methyltransferase	16	15	14716.8	17590	2873.2	0.26	0.7561	1
RVBD_0727c	-	l-fuculose phosphate aldolase FucA	12	11	12265.8	11797.2	-468.7	-0.06	0.8947	1
RVBD_0728c	-	d-3-phosphoglycerate dehydrogenase SerA2	9	9	9083.5	10678	1594.5	0.23	0.5952	1
RVBD_0729	-	xylulokinase XylB	19	15	35692.6	34211.8	-1480.8	-0.06	0.8825	1
RVBD_0730	-	N-acetyltransferase	4	3	11460.5	12555	1094.5	0.13	0.8131	1
RVBD_0731c	-	s-adenosylmethionine-dependent methyltransferase	10	9	10301.2	14943.6	4642.3	0.54	0.2502	1
RVBD_0732	-	preprotein translocase subunit SecY	28	7	338.4	206.6	-131.8	-0.71	0.6212	1
RVBD_0733	-	adenylate kinase Adk	6	4	1119	518.3	-600.7	-1.11	0.6802	1
RVBD_0734	-	methionine aminopeptidase MapA	10	9	6023.2	2806	-3217.2	-1.1	0.2319	1
RVBD_0735	-	alternative RNA polymerase sigma factor SigL	7	7	7017	6164	-853	-0.19	0.829	1
RVBD_0736	-	anti-sigma factor RslA	9	5	64.6	341	276.4	2.4	0.0473	0.9606
RVBD_0737	-	transcriptional regulator	5	3	1012	1418	406	0.49	0.4952	1
RVBD_0738	-	hypothetical protein	1	1	1955.4	2545.3	589.9	0.38	0.7083	1
RVBD_0739	-	hypothetical protein	18	16	14342.5	18670.9	4328.4	0.38	0.3021	1
RVBD_0740	-	hypothetical protein	10	9	7044.7	6203.2	-841.5	-0.18	0.6335	1
RVBD_0741	-	transposase	4	4	2542.8	4213.3	1670.5	0.73	0.3121	1
RVBD_0742	-	PE-PGRS family protein PE_PGRS8	5	3	3673.1	2135.7	-1537.4	-0.78	0.1895	1
RVBD_0743c	-	hypothetical protein	9	9	22944.9	17103.3	-5841.6	-0.42	0.306	1
RVBD_0744Ac	-	mycolyltransferase II	1	1	1404.6	848.2	-556.3	-0.73	0.3655	1
RVBD_0744c	-	transcriptional regulator	9	6	1482	1068.2	-413.8	-0.47	0.6216	1
RVBD_0745	-	hypothetical protein	7	5	6137.1	6216.9	79.8	0.02	0.9768	1
RVBD_0746	-	PE-PGRS family protein PE_PGRS9	16	11	5503.1	4071.9	-1431.2	-0.43	0.5129	1
RVBD_0747	-	PE-PGRS family protein PE_PGRS10	17	15	14803.3	5048.6	-9754.7	-1.55	0.0027	0.2595
RVBD_0748	-	antitoxin VapB31	3	3	8032.3	2896.6	-5135.7	-1.47	0.177	1
RVBD_0749	-	toxin VapC31	5	5	4458.9	6639.1	2180.2	0.57	0.1563	1
RVBD_0749A	-	hypothetical protein	1	1	120.5	17.1	-103.4	-2.82	0.7021	1
RVBD_0750	-	hypothetical protein	5	4	1342.4	1866.8	524.4	0.48	0.4223	1
RVBD_0751c	-	3-hydroxyisobutyrate dehydrogenase MmsB	7	6	16575.5	7738.4	-8837	-1.1	0.1516	1
RVBD_0752c	-	acyl-CoA dehydrogenase FadE9	15	13	8433.4	9199.8	766.4	0.13	0.8269	1
RVBD_0753c	-	methylmalonate-semialdehyde dehydrogenase MmsA	18	17	14460.8	23402.5	8941.7	0.69	0.0382	0.9198
RVBD_0754	-	PE-PGRS family protein PE_PGRS11	31	29	30173.3	29457.4	-715.9	-0.03	0.9161	1
RVBD_0755A	-	transposase	5	3	5920.8	5348.5	-572.4	-0.15	0.7657	1
RVBD_0755c	-	PPE family protein PPE12	55	19	11550.8	10404	-1146.8	-0.15	0.7886	1
RVBD_0756c	-	hypothetical protein	7	7	10403.8	9926.6	-477.1	-0.07	0.8898	1
RVBD_0757	-	OmpR family two-component system response regulator	12	5	4.9	1.2	-3.7	-2.05	0.2692	1
RVBD_0758	-	OmpR family two-component system sensor histidine kinase	18	12	143.9	6.4	-137.5	-4.48	0.0001	0.0237
RVBD_0759c	-	hit-like protein	2	2	181.8	162.8	-18.9	-0.16	0.8542	1
RVBD_0760c	-	steroid delta-isomerase	6	5	2922.8	4382.1	1459.3	0.58	0.2411	1
RVBD_0761c	-	NAD-dependent zinc-type alcohol dehydrogenase AdhB	13	10	18281.9	15632.9	-2649	-0.23	0.6417	1
RVBD_0762c	-	hypothetical protein	13	11	15579.7	9792.4	-5787.3	-0.67	0.2412	1
RVBD_0763c	-	ferredoxin	2	1	276.1	473.2	197.1	0.78	0.2041	1
RVBD_0764c	-	cytochrome P450 51 Cyp51	19	16	19522	13473.2	-6048.8	-0.54	0.3064	1
RVBD_0765c	-	oxidoreductase	12	10	6211.3	8359.1	2147.9	0.43	0.4245	1
RVBD_0766c	-	cytochrome P450 123 Cyp123	25	18	15407.1	13721.5	-1685.6	-0.17	0.6363	1
RVBD_0767c	-	hypothetical protein	14	13	4963.6	4449.3	-514.3	-0.16	0.816	1
RVBD_0768	-	aldehyde dehydrogenase (NAD+)	28	21	13568.5	14278.6	710.1	0.07	0.8418	1
RVBD_0769	-	3-oxoacyl-[acyl-carrier protein] reductase	17	12	9318.3	7181.5	-2136.9	-0.38	0.4786	1
RVBD_0770	-	dehydrogenase/reductase	10	8	8435	5083	-3352	-0.73	0.1971	1
RVBD_0771	-	4-carboxymuconolactone decarboxylase	11	11	11953.3	13523.1	1569.8	0.18	0.6629	1
RVBD_0772	-	phosphoribosylamine glycine ligase PurD	25	7	6	7.2	1.2	0.26	0.8949	1
RVBD_0773c	-	bifunctional acylase GgtA	20	15	7593.1	11317	3723.9	0.58	0.3062	1
RVBD_0774c	-	exported protein	10	5	5852.2	6382.2	529.9	0.13	0.8404	1
RVBD_0775	-	hypothetical protein	9	8	14817.3	15376.6	559.3	0.05	0.9328	1
RVBD_0776c	-	hypothetical protein	15	13	17921.1	19163.7	1242.6	0.1	0.7581	1
RVBD_0777	-	adenylosuccinate lyase PurB	19	5	1769.5	2133.5	364	0.27	0.8894	1
RVBD_0778	-	cytochrome P450 126 Cyp126	22	19	19188.4	17736.6	-1451.8	-0.11	0.7041	1
RVBD_0779c	-	transmembrane protein	8	7	3061.1	2614.8	-446.3	-0.23	0.7034	1
RVBD_0780	-	phosphoribosylaminoimidazole-succinocarboxamide synthase PurC	26	5	4	9.5	5.4	1.23	0.1833	1
RVBD_0781	-	protease II PtrB	26	11	6741.6	7270.9	529.3	0.11	0.8118	1
RVBD_0782	-	protease II PtrB	46	23	14963.2	16303.5	1340.3	0.12	0.751	1
RVBD_0783c	-	multidrug resistance integral membrane efflux protein EmrB	27	17	18219.7	13883.6	-4336.1	-0.39	0.3818	1
RVBD_0784	-	hypothetical protein	10	8	1805.7	2371.8	566.1	0.39	0.5672	1
RVBD_0785	-	KsdD-like steroid dehydrogenase	36	26	21416.4	21821.7	405.3	0.03	0.9322	1
RVBD_0786c	-	hypothetical protein	14	11	14266.6	13100.2	-1166.4	-0.12	0.8178	1
RVBD_0787	-	hypothetical protein	16	14	9927.6	9100	-827.6	-0.13	0.8088	1
RVBD_0787A	-	phosphoribosylformylglycinamidine synthase	2	2	3	0	-3	-0.01	0.1835	1
RVBD_0788	-	phosphoribosylformylglycinamidine synthase I PURG	12	3	5	3.8	-1.2	-0.39	0.7906	1
RVBD_0789c	-	hypothetical protein	7	6	3303.6	5669.6	2366	0.78	0.1241	1
RVBD_0790c	-	hypothetical protein	21	16	42519.9	33410.4	-9109.5	-0.35	0.3812	1
RVBD_0791c	-	hypothetical protein	13	12	10236.8	7742.4	-2494.4	-0.4	0.4088	1
RVBD_0792c	-	transcriptional regulator GntR-family	19	16	12023.7	14420.3	2396.6	0.26	0.6163	1
RVBD_0793	-	monooxygenase	9	9	9818.5	6615.7	-3202.9	-0.57	0.3436	1
RVBD_0794c	-	dihydrolipoamide dehydrogenase	19	17	14345.9	16203.8	1857.9	0.18	0.6585	1
RVBD_0795	-	transposase	5	5	1229.2	2031.3	802.1	0.72	0.3403	1
RVBD_0796	-	transposase	23	7	10.9	23.2	12.3	1.09	0.1894	1
RVBD_0797	-	transposase	13	10	4276.4	4083.5	-192.9	-0.07	0.8854	1
RVBD_0798c	-	antigen Cfp29	16	13	4820.2	2258.7	-2561.6	-1.09	0.0732	1
RVBD_0799c	-	dyp-type peroxidase	10	6	10654	1268	-9386	-3.07	0.0024	0.2595	*
RVBD_0800	-	aminopeptidase PepC	17	13	7927.3	7364.6	-562.8	-0.11	0.8251	1
RVBD_0801	-	hypothetical protein	2	1	2307.2	4217.3	1910.1	0.87	0.0994	1
RVBD_0802c	-	succinyltransferase	15	12	12225	12506.3	281.3	0.03	0.9508	1
RVBD_0803	-	phosphoribosylformylglycinamidine synthase II PurL	35	9	12.8	2.4	-10.4	-2.44	0.0313	0.8594
RVBD_0804	-	hypothetical protein	7	6	6770.7	6522.9	-247.8	-0.05	0.8961	1
RVBD_0805	-	cyclic nucleotide phosphodiesterase	18	15	1535.7	1420.2	-115.5	-0.11	0.8498	1
RVBD_0806c	-	UDP-glucose-4-epimerase CpsY	42	29	3926.4	1929.9	-1996.4	-1.02	0.0365	0.9087
RVBD_0807	-	hypothetical protein	2	0	0	0	0	0	1	1
RVBD_0808	-	amidophosphoribosyltransferase PurF	27	11	263.8	147.8	-116	-0.84	0.9237	1
RVBD_0809	-	phosphoribosylformylglycinamidine CYCLO-ligase PurM	15	6	2907.8	2685.7	-222.1	-0.11	0.922	1
RVBD_0810c	-	hypothetical protein	4	1	1	0	-1	1.62	1	1
RVBD_0811c	-	folate-binding protein YgfZ	17	8	4	47.6	43.6	3.56	0.0389	0.9198
RVBD_0812	-	amino acid aminotransferase	17	12	129	1080.5	951.5	3.07	0.2453	1
RVBD_0813c	-	fatty acid-binding protein-like protein	13	13	13259.1	10451.8	-2807.4	-0.34	0.3743	1
RVBD_0814c	-	hypothetical protein	3	3	265	1025.4	760.4	1.95	0.1223	1
RVBD_0815c	-	thiosulfate sulfurtransferase CysA2	15	12	3883.3	6675.1	2791.7	0.78	0.0224	0.741
RVBD_0816c	-	thioredoxin ThiX	3	3	1178.6	1582.3	403.6	0.42	0.7591	1
RVBD_0817c	-	exported protein	16	8	764.9	785.4	20.4	0.04	0.9739	1
RVBD_0818	-	transcriptional regulator	11	11	18924.4	30333	11408.6	0.68	0.2128	1
RVBD_0819	-	N-acetyltransferase MshD	14	10	1073.3	791.2	-282.1	-0.44	0.76	1
RVBD_0820	-	phosphate-transport ABC transporter ATP-binding protein PhoT	13	13	335777	252776	-83000.8	-0.41	0.2052	1
RVBD_0821c	-	phosphate-transport system transcriptional regulator PhoY2	6	5	13978.9	30485.5	16506.6	1.12	0.1805	1
RVBD_0822c	-	hypothetical protein	29	26	43447.8	60859.5	17411.7	0.49	0.0483	0.965
RVBD_0823c	-	transcriptional regulator	17	17	43822.4	47702.6	3880.2	0.12	0.7876	1
RVBD_0824c	-	acyl carrier protein desaturase DesA1	19	5	4.9	3.1	-1.8	-0.65	0.6328	1
RVBD_0825c	-	hypothetical protein	10	10	15037.5	19924.9	4887.4	0.41	0.5697	1
RVBD_0826	-	hypothetical protein	22	22	63290	51568.5	-11721.5	-0.3	0.2001	1
RVBD_0827c	-	ArsR family transcriptional regulator KmtR	7	6	907.6	2585.9	1678.3	1.51	0.0074	0.4387
RVBD_0828c	-	deaminase	10	10	27710.6	21421	-6289.7	-0.37	0.2951	1
RVBD_0829	-	transposase	4	4	4443.5	5146.3	702.8	0.21	0.6495	1
RVBD_0830	-	s-adenosylmethionine-dependent methyltransferase	21	20	29379.5	34108	4728.5	0.22	0.4243	1
RVBD_0831c	-	hypothetical protein	19	19	23762.9	33412.3	9649.4	0.49	0.0515	1
RVBD_0832	-	PE-PGRS family protein PE_PGRS12	4	4	6456.3	6627.6	171.4	0.04	0.9579	1
RVBD_0833	-	PE-PGRS family protein PE_PGRS13	12	9	2588.8	815	-1773.9	-1.67	0.0696	1
RVBD_0834c	-	PE-PGRS family protein PE_PGRS14	27	25	19391.8	21138.8	1747	0.12	0.6898	1
RVBD_0835	-	lipoprotein LpqQ	15	14	17281.3	18750.4	1469.1	0.12	0.7375	1
RVBD_0836c	-	hypothetical protein	9	8	8820.5	11604.3	2783.8	0.4	0.4087	1
RVBD_0837c	-	hypothetical protein	22	21	23975.6	21226	-2749.6	-0.18	0.6661	1
RVBD_0838	-	lipoprotein LpqR	7	7	5284	3607	-1677	-0.55	0.3891	1
RVBD_0839	-	hypothetical protein	15	13	21069.1	13658.9	-7410.2	-0.63	0.08	1
RVBD_0840c	-	proline iminopeptidase Pip	8	6	13996.3	12199.6	-1796.7	-0.2	0.5423	1
RVBD_0841	-	transmembrane protein	3	2	942.9	1272.2	329.3	0.43	0.4398	1
RVBD_0842	-	integral membrane protein	24	20	9397.4	10683.3	1285.9	0.19	0.6242	1
RVBD_0843	-	pyruvate dehydrogenase E1 component	18	16	21220.7	20053.5	-1167.2	-0.08	0.7971	1
RVBD_0844c	-	nitrate/nitrite response transcriptional regulator NarL	9	9	24401.5	24673.9	272.4	0.02	0.9752	1
RVBD_0845	-	NarL family two-component system sensor histidine kinase	27	24	20597.8	19840.6	-757.2	-0.05	0.8933	1
RVBD_0846c	-	oxidoreductase	31	23	17252.3	20254.8	3002.5	0.23	0.514	1
RVBD_0847	-	lipoprotein LpqS	6	6	6698	5196.4	-1501.6	-0.37	0.6415	1
RVBD_0848	-	cysteine synthase A CysK2	29	22	19187.6	16520.9	-2666.7	-0.22	0.5997	1
RVBD_0849	-	integral membrane transporter	23	19	16467.9	18293.8	1825.9	0.15	0.7321	1
RVBD_0850	-	transposase	10	8	9518.9	5716	-3802.9	-0.74	0.0978	1
RVBD_0851c	-	oxidoreductase	9	7	3552.4	4692	1139.6	0.4	0.3311	1
RVBD_0852	-	fatty-acid-CoA ligase FadD16	15	10	8821.9	7335.7	-1486.2	-0.27	0.6207	1
RVBD_0853c	-	pyruvate or indole-3-pyruvate decarboxylase Pdc	26	24	39751.5	32060.7	-7690.8	-0.31	0.4758	1
RVBD_0854	-	hypothetical protein	7	7	15071.6	14971.3	-100.3	-0.01	0.9759	1
RVBD_0855	-	fatty-acid-CoA racemase Far	14	12	18882.4	18224	-658.4	-0.05	0.918	1
RVBD_0856	-	hypothetical protein	5	4	4112	3636	-476	-0.18	0.7933	1
RVBD_0857	-	hypothetical protein	9	9	9487.1	6313.4	-3173.7	-0.59	0.3089	1
RVBD_0858c	-	n-succinyldiaminopimelate aminotransferase DapC	20	16	7958.4	6807.5	-1150.9	-0.23	0.5442	1
RVBD_0859	-	acyl-CoA thiolase FadA	9	5	4	7.2	3.2	0.86	0.6388	1
RVBD_0860	-	fatty oxidation protein FadB	27	10	10	22.6	12.6	1.18	0.4613	1
RVBD_0861c	-	DNA helicase Ercc3	27	25	10995.2	7235.3	-3759.9	-0.6	0.1998	1
RVBD_0862c	-	hypothetical protein	29	19	9022.7	9457.8	435.1	0.07	0.8641	1
RVBD_0863	-	hypothetical protein	7	7	6518.5	5495.3	-1023.2	-0.25	0.632	1
RVBD_0864	-	molybdenum cofactor biosynthesis protein C2 MoaC2	11	8	12560.4	8434.9	-4125.5	-0.57	0.2645	1
RVBD_0865	-	molybdopterin biosynthesis protein Mog	8	8	8048.7	8565.2	516.5	0.09	0.8826	1
RVBD_0866	-	molybdenum cofactor biosynthesis protein E2 MoaE2	4	3	5028.5	3507.3	-1521.3	-0.52	0.5699	1
RVBD_0867c	-	resuscitation-promoting factor RpfA	12	12	22810.1	29789.9	6979.8	0.39	0.4668	1
RVBD_0868c	-	molybdenum cofactor biosynthesis protein D2 MoaD2	6	6	17107	13724.4	-3382.6	-0.32	0.5732	1
RVBD_0869c	-	molybdenum cofactor biosynthesis protein A2 MoaA2	14	12	13453.3	10988.4	-2465	-0.29	0.5677	1
RVBD_0870c	-	integral membrane protein	6	6	5030.7	3259.7	-1771	-0.63	0.1537	1
RVBD_0871	-	cold shock protein B CspB	5	4	12896.4	12304.5	-591.9	-0.07	0.8969	1
RVBD_0872c	-	PE-PGRS family protein PE_PGRS15	27	23	35422.7	41244.4	5821.7	0.22	0.5781	1
RVBD_0873	-	acyl-CoA dehydrogenase FadE10	35	29	32515.9	30238.9	-2277	-0.1	0.679	1
RVBD_0874c	-	hypothetical protein	9	9	23741.3	17410.8	-6330.5	-0.45	0.4453	1
RVBD_0875c	-	exported protein	12	7	309.1	517.4	208.3	0.74	0.6239	1
RVBD_0876c	-	transmembrane protein	26	16	4323.9	3803.3	-520.5	-0.19	0.8704	1
RVBD_0877	-	hypothetical protein	16	15	101734	102148	413.5	0.01	0.9821	1
RVBD_0878c	-	PPE family protein PPE13	19	19	25789.3	37145.5	11356.2	0.53	0.1224	1
RVBD_0879c	-	transmembrane protein	3	2	819.5	3286.8	2467.3	2	0.1006	1
RVBD_0880	-	transcriptional regulator MarR-family	1	1	181.1	21.7	-159.4	-3.06	0.694	1
RVBD_0881	-	methyltransferase	15	14	12573.5	9071.2	-3502.3	-0.47	0.2515	1
RVBD_0882	-	transmembrane protein	2	1	859.3	653.8	-205.6	-0.39	0.634	1
RVBD_0883c	-	hypothetical protein	6	0	0	0	0	0	1	1
RVBD_0884c	-	phosphoserine aminotransferase SerC	12	3	3	1.3	-1.7	-1.21	0.5769	1
RVBD_0885	-	hypothetical protein	15	11	7364	7228.3	-135.7	-0.03	0.9573	1
RVBD_0886	-	NADPH:adrenodoxin oxidoreductase FprB	26	22	26394.7	19105.2	-7289.5	-0.47	0.1329	1
RVBD_0887c	-	protein PhnB	4	4	1915.7	3439.9	1524.2	0.84	0.7285	1
RVBD_0888	-	exported protein	31	25	44447.2	41756	-2691.2	-0.09	0.7842	1
RVBD_0889c	-	citrate synthase II CitA	13	12	9265.3	13365.2	4099.9	0.53	0.1458	1
RVBD_0890c	-	transcriptional regulator LuxR-family	48	44	78374.5	60172.9	-18201.5	-0.38	0.3571	1
RVBD_0891c	-	transcriptional regulator	26	22	13450	19316.8	5866.8	0.52	0.0946	1
RVBD_0892	-	monooxygenase	43	32	11668.8	14072.6	2403.8	0.27	0.4299	1
RVBD_0893c	-	s-adenosylmethionine-dependent methyltransferase	24	14	4771.5	2732.3	-2039.1	-0.8	0.2519	1
RVBD_0894	-	transcriptional regulator LuxR-family	18	10	7264.8	9456.9	2192.1	0.38	0.4989	1
RVBD_0895	-	diacylglycerol acyltransferase	29	24	31769.5	31379.7	-389.8	-0.02	0.9444	1
RVBD_0896	-	citrate synthase I GltA2	29	11	31.8	357.7	326	3.49	0.1957	1
RVBD_0897c	-	oxidoreductase	20	17	12757.3	12136.9	-620.4	-0.07	0.8447	1
RVBD_0898c	-	hypothetical protein	1	1	1878.2	1872.2	-6	0	1	1
RVBD_0899	-	outer membrane protein A OmpA	20	14	8148.7	8495.6	346.9	0.06	0.904	1
RVBD_0900	-	membrane protein	2	2	583.1	1188.5	605.3	1.03	0.0912	1
RVBD_0901	-	exported or membrane protein	9	9	11364.5	11039.7	-324.7	-0.04	0.9258	1
RVBD_0902c	-	two-component system sensor histidine kinase PrrB	14	4	2098.7	2267.8	169.1	0.11	0.8928	1
RVBD_0903c	-	two-component system transcriptional regulator PrrA	10	6	322.2	311	-11.2	-0.05	0.8947	1
RVBD_0904c	-	acetyl-CoA carboxylase carboxyl transferase AccD3	24	19	13149.1	13042.8	-106.3	-0.01	0.9792	1
RVBD_0905	-	enoyl-CoA hydratase EchA6	10	7	5048.7	8111.8	3063.1	0.68	0.2684	1
RVBD_0906	-	hypothetical protein	16	14	13748.7	14438.7	689.9	0.07	0.8689	1
RVBD_0907	-	beta-lactamase	43	35	21160.6	16995.1	-4165.5	-0.32	0.2843	1
RVBD_0908	-	metal cation transporter P-type ATPase CtpE	31	24	17786.8	19762.1	1975.2	0.15	0.6275	1
RVBD_0909	-	hypothetical protein	3	3	234.5	87	-147.5	-1.43	0.4717	1
RVBD_0910	-	hypothetical protein	7	4	79.1	27.8	-51.3	-1.51	1	1
RVBD_0911	-	hypothetical protein	16	15	10846.5	11664.8	818.3	0.1	0.827	1
RVBD_0912	-	transmembrane protein	5	3	19163.9	20346.8	1182.9	0.09	0.9518	1
RVBD_0913c	-	carotenoid cleavage dioxygenase	40	26	10499.6	12182.9	1683.4	0.21	0.6149	1
RVBD_0914c	-	acetyl-CoA acetyltransferase	17	14	10988.3	10336.8	-651.5	-0.09	0.8754	1
RVBD_0915c	-	PPE family protein PPE14	19	16	27975.8	23539.6	-4436.2	-0.25	0.4979	1
RVBD_0916c	-	PE family protein PE7	5	4	4048.3	5900.4	1852.1	0.54	0.3162	1
RVBD_0917	-	glycine betaine transport integral membrane protein BetP	42	35	58557.2	67212.6	8655.4	0.2	0.7427	1
RVBD_0918	-	hypothetical protein	8	7	5444.6	3296.3	-2148.3	-0.72	0.2235	1
RVBD_0919	-	N-acetyltransferase	10	9	19871.1	14966.3	-4904.7	-0.41	0.2863	1
RVBD_0920c	-	transposase	22	19	7530.2	9968.3	2438	0.4	0.3368	1
RVBD_0921	-	resolvase	7	6	7779.2	8213.3	434.1	0.08	0.8355	1
RVBD_0922	-	transposase	18	15	41900.5	33652.6	-8247.9	-0.32	0.3636	1
RVBD_0923c	-	hypothetical protein	21	18	12170.1	12104.9	-65.2	-0.01	0.9791	1
RVBD_0924c	-	divalent cation-transport integral membrane protein MntH	20	19	20268.2	24173.3	3905.1	0.25	0.6	1
RVBD_0925c	-	manganese transporter	17	17	15229.6	19682.3	4452.7	0.37	0.563	1
RVBD_0926c	-	dihydrodipicolinate reductase	21	21	10687	16482.2	5795.2	0.63	0.0696	1
RVBD_0927c	-	7-alpha-hydroxysteroid dehydrogenase	6	5	9031.8	9923.2	891.4	0.14	0.8013	1
RVBD_0928	-	periplasmic phosphate-binding lipoprotein PstS3	22	20	256949	210819	-46130	-0.29	0.4537	1
RVBD_0929	-	phosphate-transport ABC transporter integral membrane protein PstC2	17	12	128794	93221.3	-35572.5	-0.47	0.2682	1
RVBD_0930	-	phosphate-transport ABC transporter integral membrane protein PstA1	16	14	226970	180254	-46715.3	-0.33	0.3736	1
RVBD_0931c	-	transmembrane serine/threonine-protein kinase D PknD	45	40	93225.9	96275.4	3049.5	0.05	0.8332	1
RVBD_0932c	-	periplasmic phosphate-binding lipoprotein PstS2	25	22	30139.4	42800.1	12660.7	0.51	0.1371	1
RVBD_0933	-	phosphate-transport ABC transporter ATP-binding protein PstB	12	10	9734	7919.5	-1814.5	-0.3	0.5715	1
RVBD_0934	-	periplasmic phosphate-binding lipoprotein PstS1	22	20	26528.3	45992.1	19463.9	0.79	0.3868	1
RVBD_0935	-	phosphate-transport ABC transporter integral membrane protein PstC1	12	11	11108.9	11136.7	27.8	0	0.9927	1
RVBD_0936	-	phosphate-transport ABC transporter integral membrane protein PstA2	20	18	22400.1	17639.5	-4760.6	-0.34	0.3265	1
RVBD_0937c	-	DNA end-binding protein Mku	13	10	10496.9	9578	-918.9	-0.13	0.8431	1
RVBD_0938	-	ATP dependent DNA ligase LigD	43	31	21490.5	20982.6	-507.9	-0.03	0.9276	1
RVBD_0939	-	bifunctional enzyme 2-hydroxyhepta-2,4-diene-1,7-dioate isomerase	32	24	19719.5	16625.3	-3094.1	-0.25	0.4661	1
RVBD_0940c	-	oxidoreductase	15	11	6236.3	4745.3	-1491	-0.39	0.5425	1
RVBD_0941c	-	anti-anti-sigma factor	9	9	9848.9	9961.5	112.6	0.02	0.9707	1
RVBD_0942	-	hypothetical protein	8	8	10582	10018	-564	-0.08	0.8802	1
RVBD_0943c	-	oxidoreductase	17	15	19800	22488.8	2688.8	0.18	0.5397	1
RVBD_0944	-	formamidopyrimidine-DNA glycosylase	9	6	9812.7	9832.1	19.4	0	0.9944	1
RVBD_0945	-	oxidoreductase	8	6	9889.6	4112.3	-5777.3	-1.27	0.1561	1
RVBD_0946c	-	glucose-6-phosphate isomerase Pgi	19	10	13	3.8	-9.2	-1.77	0.0333	0.8869
RVBD_0948c	-	chorismate mutase	6	1	445.8	324.3	-121.4	-0.46	0.8573	1
RVBD_0949	-	ATP-dependent DNA helicase II UvrD1	45	32	2068.6	3021.5	952.9	0.55	0.5724	1
RVBD_0950c	-	hypothetical protein	21	18	6564.1	13790.6	7226.5	1.07	0.0157	0.6466
RVBD_0951	-	succinyl-CoA synthetase beta chain SucC	16	4	5	0	-5	-0.73	0.0362	0.9087
RVBD_0952	-	succinyl-CoA synthetase alpha chain SucD	12	3	351.8	78.2	-273.6	-2.17	0.8805	1
RVBD_0953c	-	oxidoreductase	12	11	6312	7737.6	1425.6	0.29	0.4818	1
RVBD_0954	-	transmembrane protein	29	24	19875	20176	301	0.02	0.9533	1
RVBD_0955	-	integral membrane protein	19	16	3958.1	993.2	-2964.9	-1.99	0.011	0.5285
RVBD_0956	-	5'-phosphoribosylglycinamide formyltransferase PurN	15	6	1425	1585	160	0.15	0.9134	1
RVBD_0957	-	bifunctional purine biosynthesis protein PurH	24	4	3	2.5	-0.5	-0.25	0.9763	1
RVBD_0958	-	magnesium chelatase	16	13	18351.4	15624.4	-2726.9	-0.23	0.4968	1
RVBD_0959	-	hypothetical protein	20	17	8122.9	9302.2	1179.3	0.2	0.6659	1
RVBD_0959A	-	antitoxin VapB9	3	2	2150.3	1894.7	-255.6	-0.18	0.8753	1
RVBD_0960	-	toxin VapC9	7	6	3732.7	5698.9	1966.2	0.61	0.3739	1
RVBD_0961	-	membrane protein	7	6	1896.6	3548.8	1652.2	0.9	0.119	1
RVBD_0962c	-	lipoprotein LprP	14	11	7517.2	8780.8	1263.6	0.22	0.6681	1
RVBD_0963c	-	hypothetical protein	10	9	15513.2	13929.7	-1583.5	-0.16	0.7521	1
RVBD_0964c	-	hypothetical protein	5	4	5246.3	4509.2	-737.1	-0.22	0.7572	1
RVBD_0965c	-	hypothetical protein	6	5	2723.4	3552.4	829.1	0.38	0.4772	1
RVBD_0966c	-	hypothetical protein	9	9	9593	7818	-1775	-0.3	0.5372	1
RVBD_0967	-	copper-sensing transcriptional repressor CsoR	1	1	603.8	1344.8	741	1.16	0.2743	1
RVBD_0968	-	hypothetical protein	6	5	10325.7	6339.3	-3986.3	-0.7	0.3123	1
RVBD_0969	-	metal cation transporter P-type ATPase CtpV	21	18	15773.7	19399	3625.3	0.3	0.3703	1
RVBD_0970	-	integral membrane protein	12	9	6582.9	8536.3	1953.5	0.37	0.5523	1
RVBD_0971c	-	enoyl-CoA hydratase EchA7	7	7	7267.7	10525.7	3257.9	0.53	0.3512	1
RVBD_0972c	-	acyl-CoA dehydrogenase FadE12	17	11	1488.8	1722.6	233.8	0.21	0.6767	1
RVBD_0973c	-	acetyl-/propionyl-coenzyme A carboxylase alpha chain alpha subunit AccA2	25	15	3273.5	2753.3	-520.2	-0.25	0.5869	1
RVBD_0974c	-	acetyl-/propionyl-CoA carboxylase beta subunit AccD2	20	12	2649.9	5035.9	2386	0.93	0.0545	1
RVBD_0975c	-	acyl-CoA dehydrogenase FadE13	20	15	24737.3	26616.1	1878.7	0.11	0.8178	1
RVBD_0976c	-	hypothetical protein	20	18	16522.5	15294.8	-1227.7	-0.11	0.7815	1
RVBD_0977	-	PE-PGRS family protein PE_PGRS16	32	30	51925.1	52891.8	966.7	0.03	0.9328	1
RVBD_0978c	-	PE-PGRS family protein PE_PGRS17	10	9	11340.2	13368.5	2028.3	0.24	0.6683	1
RVBD_0979A	-	50S ribosomal protein L32 RpmF	2	1	83.8	325.2	241.4	1.96	0.4038	1
RVBD_0979c	-	hypothetical protein	2	2	198.5	82.2	-116.3	-1.27	0.921	1
RVBD_0980c	-	PE-PGRS family protein PE_PGRS18	16	14	24342.8	20712.7	-3630.1	-0.23	0.5816	1
RVBD_0981	-	mycobacterial persistence regulator MRPA	11	10	10632.6	4774.1	-5858.5	-1.16	0.0235	0.7527
RVBD_0982	-	two-component system sensor histidine kinase MprB	23	14	3851	5116.6	1265.6	0.41	0.6758	1
RVBD_0983	-	serine protease PepD	19	16	4390.6	3913	-477.5	-0.17	0.7754	1
RVBD_0984	-	pterin-4-alpha-carbinolamine dehydratase MoaB2	5	3	3361.4	2655.1	-706.3	-0.34	0.687	1
RVBD_0985c	-	large-conductance mechanosensitive channel MscL	9	8	15599.4	14160	-1439.5	-0.14	0.7421	1
RVBD_0986	-	adhesion component transport ABC transporter ATP-binding protein	25	13	2531.7	5694.7	3163	1.17	0.0099	0.5057
RVBD_0987	-	adhesion component transport ABC transporter transmembrane protein	94	38	7774.4	8101.4	327.1	0.06	0.9045	1
RVBD_0988	-	exported protein	41	14	3383.6	2657.8	-725.8	-0.35	0.778	1
RVBD_0989c	-	polyprenyl-diphosphate synthase GrcC2	18	15	19720.8	23778.2	4057.4	0.27	0.4278	1
RVBD_0990c	-	hypothetical protein	8	8	5431.7	4411.9	-1019.7	-0.3	0.6942	1
RVBD_0991c	-	serine rich protein	3	3	19046	14660.4	-4385.7	-0.38	0.4915	1
RVBD_0992c	-	5-formyltetrahydrofolate cyclo-ligase	6	6	20428.9	15849.7	-4579.2	-0.37	0.5396	1
RVBD_0993	-	glucose-1-phosphate uridylyltransferase GalU	15	7	2721.4	3407.4	686.1	0.32	0.8259	1
RVBD_0994	-	molybdopterin biosynthesis protein MoeA1	14	10	2533.4	4321.8	1788.4	0.77	0.0847	1
RVBD_0995	-	ribosomal-protein-alanine acetyltransferase RimJ	6	3	182.3	186.2	3.9	0.03	0.9875	1
RVBD_0996	-	transmembrane protein	18	16	5436.6	4922.2	-514.4	-0.14	0.8408	1
RVBD_0997	-	hypothetical protein	7	6	7907.8	9041.4	1133.6	0.19	0.6977	1
RVBD_0998	-	hypothetical protein	13	3	3	0	-3	-0.01	0.2067	1
RVBD_0999	-	hypothetical protein	11	11	12098.6	10452.6	-1646	-0.21	0.6429	1
RVBD_1000c	-	hypothetical protein	8	7	17328.8	21937.5	4608.7	0.34	0.4784	1
RVBD_1001	-	arginine deiminase ArcA	21	19	27224.9	23309.5	-3915.4	-0.22	0.566	1
RVBD_1002c	-	protein O-mannosyltransferase	24	8	7.9	1.2	-6.7	-2.74	0.0251	0.7853
RVBD_1003	-	ribosomal RNA small subunit methyltransferase I	9	8	4091.9	4514.2	422.3	0.14	0.813	1
RVBD_1004c	-	membrane protein	12	11	17723.5	17251.4	-472.1	-0.04	0.9154	1
RVBD_1005c	-	para-aminobenzoate synthase component I PABD	24	11	3825.6	4074.9	249.3	0.09	0.9108	1
RVBD_1006	-	hypothetical protein	42	38	10766.2	15378.7	4612.6	0.51	0.1028	1
RVBD_1007c	-	methionyl-tRNA synthetase MetS	31	7	5.9	1.6	-4.4	-1.92	0.0969	1
RVBD_1008	-	deoxyribonuclease TatD	13	11	14098.8	14240.7	141.8	0.01	0.9768	1
RVBD_1009	-	resuscitation-promoting factor RpfB	12	11	4026.5	6607.2	2580.7	0.71	0.3772	1
RVBD_1010	-	ribosomal RNA small subunit methyltransferase A	12	9	146.2	87.5	-58.6	-0.74	0.3447	1
RVBD_1011	-	4-diphosphocytidyl-2-C-methyl-D-erythritol kinase IspE	13	7	5	3.7	-1.3	-0.43	0.6938	1
RVBD_1012	-	hypothetical protein	6	5	4157.2	4527.5	370.3	0.12	0.859	1
RVBD_1013	-	polyketide synthase Pks16	22	22	29977.9	22390.9	-7587	-0.42	0.1855	1
RVBD_1014c	-	peptidyl-tRNA hydrolase Pth	11	5	4.9	3.7	-1.2	-0.42	0.7367	1
RVBD_1015c	-	50S ribosomal protein L25 RplY	10	5	3	4.2	1.2	0.5	0.6675	1
RVBD_1016c	-	lipoprotein LpqT	6	5	10454.4	8036.6	-2417.8	-0.38	0.4925	1
RVBD_1017c	-	ribose-phosphate pyrophosphokinase PrsA	12	5	15.1	0	-15.1	-2.33	0.016	0.6523
RVBD_1018c	-	UDP-N-acetylglucosamine pyrophosphorylase GlmU	24	11	9.9	6.4	-3.4	-0.62	0.3662	1
RVBD_1019	-	transcriptional regulator TetR-family	9	7	18036.3	18353.4	317.1	0.03	0.9318	1
RVBD_1020	-	transcription-repair coupling factor Mfd	40	37	55866.4	41118.4	-14748	-0.44	0.125	1
RVBD_1021	-	nucleoside triphosphate pyrophosphohydrolase	14	11	10498.7	11761.2	1262.5	0.16	0.8197	1
RVBD_1022	-	lipoprotein LpqU	15	11	5384.4	6293.7	909.4	0.23	0.6641	1
RVBD_1023	-	enolase Eno	17	4	772.8	645	-127.7	-0.26	0.7971	1
RVBD_1024	-	cell division protein DivIC	8	2	1	1.3	0.3	0.37	1	1
RVBD_1025	-	hypothetical protein	7	2	0	2.6	2.6	-0.19	0.4581	1
RVBD_1026	-	exopolyphosphatase	9	7	3130.1	3508.1	378	0.16	0.808	1
RVBD_1027c	-	potassium-transporting transcriptional regulator KdpE	11	8	5713.3	2675.3	-3038	-1.09	0.1259	1
RVBD_1028A	-	potassium-transporting membrane protein KdpF	3	1	508.9	791.9	283	0.64	0.4007	1
RVBD_1028c	-	potassium channel sensor histidine kinase KdpD	28	23	7734.3	7332.8	-401.5	-0.08	0.8774	1
RVBD_1029	-	potassium-transporting P-type ATPase A chain KdpA	28	24	33504.2	36748.9	3244.7	0.13	0.6679	1
RVBD_1030	-	potassium-transporting P-type ATPase B chain KdpB	15	13	5580.9	7280.3	1699.4	0.38	0.3795	1
RVBD_1031	-	potassium-transporting P-type ATPase C chain KdpC	10	10	5400.4	7687.7	2287.3	0.51	0.367	1
RVBD_1032c	-	two-component system sensor histidine kinase TrcS	25	23	10280	11011	731	0.1	0.8377	1
RVBD_1033c	-	two-component system transcriptional regulator TrcR	15	14	14677.9	9725.1	-4952.8	-0.59	0.1817	1
RVBD_1034c	-	transposase	2	2	252.8	707.2	454.4	1.48	0.105	1
RVBD_1035c	-	transposase	4	4	2260.7	2564.1	303.4	0.18	0.8718	1
RVBD_1036c	-	transposase	5	4	1886.2	2516.2	630.1	0.42	0.4643	1
RVBD_1037c	-	ESAT-6 like protein EsxI	4	4	2869.5	3448.9	579.4	0.27	0.6842	1
RVBD_1038c	-	ESAT-6 like protein EsxJ	3	3	2181.3	3122.4	941	0.52	0.4911	1
RVBD_1039c	-	PPE family protein PPE15	24	22	34589	40126.8	5537.7	0.21	0.4659	1
RVBD_1040c	-	PE family protein PE8	8	8	8836.3	8339.4	-496.9	-0.08	0.8601	1
RVBD_1041c	-	transposase	18	17	6534.8	8364.9	1830.1	0.36	0.2765	1
RVBD_1042c	-	transposase	6	6	1144.6	2332.5	1187.8	1.03	0.2062	1
RVBD_1043c	-	hypothetical protein	14	13	28670	29999.7	1329.8	0.07	0.9099	1
RVBD_1044	-	hypothetical protein	13	5	2007	1848.8	-158.2	-0.12	0.9046	1
RVBD_1045	-	hypothetical protein	12	10	18614.8	16962.4	-1652.4	-0.13	0.7906	1
RVBD_1046c	-	hypothetical protein	6	6	5649.9	6775	1125	0.26	0.5824	1
RVBD_1047	-	transposase	17	11	3827.3	3557	-270.4	-0.11	0.8571	1
RVBD_1048c	-	hypothetical protein	24	18	21418	21615	197	0.01	0.9749	1
RVBD_1049	-	transcriptional repressor	4	4	6014.5	6372.3	357.8	0.08	0.9323	1
RVBD_1050	-	oxidoreductase	12	10	11037.1	13848.2	2811.1	0.33	0.3622	1
RVBD_1051c	-	hypothetical protein	8	4	1581.8	1604.8	23.1	0.02	0.9867	1
RVBD_1052	-	hypothetical protein	7	7	3896.6	6648.7	2752	0.77	0.1733	1
RVBD_1053c	-	hypothetical protein	6	5	2287	4066.3	1779.3	0.83	0.413	1
RVBD_1054	-	integrase	5	4	2976.5	3871.2	894.6	0.38	0.5518	1
RVBD_1055	-	integrase	3	2	1386.9	589.2	-797.7	-1.23	0.9499	1
RVBD_1056	-	hypothetical protein	23	23	23265.3	34217.7	10952.4	0.56	0.0714	1
RVBD_1057	-	hypothetical protein	20	20	36580.3	39273.5	2693.2	0.1	0.7415	1
RVBD_1058	-	fatty-acid-CoA ligase FadD14	29	23	42014.1	17986.5	-24027.6	-1.22	0.0033	0.2883
RVBD_1059	-	dihydrodipicolinate reductase	10	6	1747.8	2376.2	628.3	0.44	0.4685	1
RVBD_1060	-	hypothetical protein	5	4	2493.3	3023.7	530.3	0.28	0.8204	1
RVBD_1061	-	hypothetical protein	14	13	15316.2	15587.3	271.1	0.03	0.9595	1
RVBD_1062	-	hypothetical protein	6	6	4281.5	2924.9	-1356.6	-0.55	0.7375	1
RVBD_1063c	-	hypothetical protein	15	12	21154.5	14383.4	-6771.1	-0.56	0.1806	1
RVBD_1064c	-	lipoprotein LpqV	6	6	6631.5	6218.8	-412.7	-0.09	0.8444	1
RVBD_1065	-	hypothetical protein	10	10	14552.1	13702.8	-849.3	-0.09	0.8217	1
RVBD_1066	-	hypothetical protein	5	5	1133.5	689.2	-444.3	-0.72	0.4403	1
RVBD_1067c	-	PE-PGRS family protein PE_PGRS19	15	10	9392.1	5226	-4166.1	-0.85	0.2624	1
RVBD_1068c	-	PE-PGRS family protein PE_PGRS20	13	10	2865.2	3640	774.7	0.35	0.4633	1
RVBD_1069c	-	hypothetical protein	20	20	28006.5	31690.1	3683.6	0.18	0.6633	1
RVBD_1070c	-	enoyl-CoA hydratase EchA8	9	7	2287.8	4615.8	2328	1.01	0.0614	1
RVBD_1071c	-	enoyl-CoA hydratase EchA9	12	12	7393.5	12851.4	5457.9	0.8	0.0275	0.8433
RVBD_1072	-	transmembrane protein	18	15	1803	5051.3	3248.4	1.49	0.1403	1
RVBD_1073	-	hypothetical protein	19	17	16996.4	14301.9	-2694.5	-0.25	0.4583	1
RVBD_1074c	-	beta-ketoacyl CoA thiolase FadA3	11	10	17097.5	16388.4	-709.1	-0.06	0.9265	1
RVBD_1075c	-	exported protein	18	17	20007.3	25210.6	5203.2	0.33	0.3806	1
RVBD_1076	-	lipase LipU	22	11	10972.1	14524	3551.9	0.4	0.4522	1
RVBD_1077	-	cystathionine beta-synthase Cbs	28	25	60478.5	56819.7	-3658.8	-0.09	0.8754	1
RVBD_1078	-	proline rich antigen Pra	18	4	30.9	120.1	89.2	1.96	0.2154	1
RVBD_1079	-	cystathionine gamma-synthase MetB	20	17	9059	10277.7	1218.7	0.18	0.7291	1
RVBD_1080c	-	transcription elongation factor GreA	9	4	1620.8	465.2	-1155.6	-1.8	0.1896	1
RVBD_1081c	-	membrane protein	7	2	7.9	38.9	31.1	2.31	0.8763	1
RVBD_1082	-	mycothiol conjugate amidase Mca	13	12	13676.2	11289.7	-2386.5	-0.28	0.5449	1
RVBD_1083	-	hypothetical protein	4	4	2878.1	466.5	-2411.6	-2.63	0.0676	1
RVBD_1084	-	hypothetical protein	27	22	24372.9	23378.7	-994.2	-0.06	0.8591	1
RVBD_1085c	-	hemolysin-like protein	11	10	28502.9	22269.9	-6233	-0.36	0.3886	1
RVBD_1086	-	short-chain Z-isoprenyl diphosphate synthase	15	11	6493.5	1598.2	-4895.3	-2.02	0.0001	0.0237
RVBD_1087	-	PE-PGRS family protein PE_PGRS21	22	21	19543	11140.8	-8402.2	-0.81	0.077	1
RVBD_1087A	-	short-chain Z-isoprenyl diphosphate synthase	8	7	6632.4	9964.9	3332.5	0.59	0.2122	1
RVBD_1088	-	PE family protein PE9	6	5	4316.8	6728.4	2411.7	0.64	0.5296	1
RVBD_1089	-	PE family protein PE10	5	4	456.8	570.3	113.5	0.32	0.7362	1
RVBD_1089A	-	cellulase CelA2a	2	2	1941.6	1975.6	34	0.03	0.9716	1
RVBD_1090	-	cellulase CelA2b	8	8	20541.7	16925.5	-3616.1	-0.28	0.4758	1
RVBD_1091	-	PE-PGRS family protein PE_PGRS22	27	21	22275	17919.9	-4355.2	-0.31	0.4292	1
RVBD_1092c	-	pantothenate kinase CoaA	19	7	3	6.3	3.3	1.08	0.2456	1
RVBD_1093	-	serine hydroxymethyltransferase 1 GlyA1	14	4	6	1.2	-4.8	-2.34	0.1117	1
RVBD_1094	-	acyl carrier protein desaturase DesA2	13	4	105.4	475.8	370.4	2.17	0.4029	1
RVBD_1095	-	PHOH-like protein PhoH2	13	11	7702.9	6476.1	-1226.8	-0.25	0.6908	1
RVBD_1096	-	glycosyl hydrolase	20	17	8645.7	8998.9	353.1	0.06	0.8661	1
RVBD_1097c	-	glycine and proline rich membrane protein	18	10	4079.3	3741.9	-337.4	-0.12	0.8327	1
RVBD_1098c	-	fumarase Fum	12	4	2	5.4	3.4	1.46	0.3279	1
RVBD_1099c	-	fructose 1,6-bisphosphatase GlpX	13	10	3282.4	6026.4	2743.9	0.88	0.1743	1
RVBD_1100	-	hypothetical protein	10	9	10977.2	5893.2	-5084	-0.9	0.0234	0.7527
RVBD_1101c	-	membrane protein	18	16	15048.5	15905.9	857.4	0.08	0.7941	1
RVBD_1102c	-	toxin MazF3	8	5	4372.8	5506.9	1134.1	0.33	0.662	1
RVBD_1103c	-	antitoxin MazE3	8	7	3451.1	3097.9	-353.1	-0.16	0.6994	1
RVBD_1104	-	esterase/lipase	11	11	14261.2	15115.5	854.3	0.08	0.868	1
RVBD_1105	-	esterase/lipase	11	8	9735.9	10165.2	429.2	0.06	0.9162	1
RVBD_1106c	-	3-beta-hydroxysteroid dehydrogenase	18	17	28738.8	19460.1	-9278.7	-0.56	0.0715	1
RVBD_1107c	-	exodeoxyribonuclease VII small subunit XseB	2	2	1849.1	1345.6	-503.6	-0.46	0.5501	1
RVBD_1108c	-	exodeoxyribonuclease VII large subunit XseA	10	10	7219.3	7118.4	-101	-0.02	0.9801	1
RVBD_1109c	-	hypothetical protein	9	8	4431.5	4244.8	-186.6	-0.06	0.9139	1
RVBD_1110	-	LYTB2 protein	14	8	5.9	2.5	-3.4	-1.25	0.246	1
RVBD_1111c	-	hypothetical protein	24	18	15850.3	22231.6	6381.3	0.49	0.2327	1
RVBD_1112	-	GTP-binding protein YchF	11	10	505.4	662.9	157.5	0.39	0.6814	1
RVBD_1113	-	antitoxin VapB32	2	1	632.6	746.2	113.6	0.24	0.9026	1
RVBD_1114	-	toxin VapC32	3	3	5855.1	3890.1	-1965	-0.59	0.4049	1
RVBD_1115	-	exported protein	18	11	16264.9	11293.7	-4971.2	-0.53	0.1209	1
RVBD_1116	-	hypothetical protein	3	3	5470.6	2231.9	-3238.7	-1.29	0.1034	1
RVBD_1116A	-	hypothetical protein	6	5	21521.6	14869.4	-6652.3	-0.53	0.556	1
RVBD_1117	-	hypothetical protein	4	4	4935.8	4919.7	-16.2	0	0.9961	1
RVBD_1118c	-	hypothetical protein	12	11	22837.6	17532.8	-5304.8	-0.38	0.4476	1
RVBD_1119c	-	hypothetical protein	3	2	2159.9	2555.7	395.8	0.24	0.6742	1
RVBD_1120c	-	hypothetical protein	4	2	365.9	446.5	80.6	0.29	0.6847	1
RVBD_1121	-	glucose-6-phosphate 1-dehydrogenase Zwf1	24	19	11058.8	10740	-318.8	-0.04	0.9125	1
RVBD_1122	-	6-phosphogluconate dehydrogenase,decarboxylating Gnd2	15	11	3669.8	3516.5	-153.3	-0.06	0.9581	1
RVBD_1123c	-	peroxidase BpoB	8	7	12621.7	10410.2	-2211.4	-0.28	0.5713	1	*
RVBD_1124	-	epoxide hydrolase EphC	12	11	4869.8	4891.1	21.3	0.01	0.9931	1
RVBD_1125	-	hypothetical protein	23	19	5197.3	6713.3	1516	0.37	0.3399	1
RVBD_1126c	-	hypothetical protein	10	7	261.8	983.5	721.7	1.91	0.3697	1
RVBD_1127c	-	pyruvate, phosphate dikinase PpdK	19	13	3484.4	4671.5	1187.1	0.42	0.462	1
RVBD_1128c	-	hypothetical protein	29	22	7005.1	7092.9	87.8	0.02	0.98	1
RVBD_1129c	-	transcriptional regulator	27	22	16895.7	12549.7	-4346	-0.43	0.66	1
RVBD_1130	-	2-methylcitrate dehydratase PrpD	27	21	31162.4	19988.3	-11174	-0.64	0.1558	1
RVBD_1131	-	methylcitrate synthase PrpC	17	15	9750.6	9689.7	-60.9	-0.01	0.9854	1
RVBD_1132	-	hypothetical protein	27	20	22666	17194.8	-5471.2	-0.4	0.2346	1
RVBD_1133c	-	5-methyltetrahydropteroyltriglutamate- homocysteine methyltransferase MetE	35	11	11.9	2.9	-9	-2.04	0.0092	0.5018
RVBD_1134	-	hypothetical protein	6	6	5208.1	5567.4	359.3	0.1	0.8691	1
RVBD_1135A	-	acetyl-CoA acetyltransferase	6	5	6034.3	3330.7	-2703.6	-0.86	0.2213	1
RVBD_1135c	-	PPE family protein PPE16	25	21	17560.8	23060	5499.2	0.39	0.2406	1
RVBD_1136	-	enoyl-CoA hydratase	4	4	3840.1	3533.4	-306.7	-0.12	0.83	1
RVBD_1137c	-	hypothetical protein	2	2	1517.7	2381.3	863.6	0.65	0.5033	1
RVBD_1138c	-	oxidoreductase	17	13	23832.4	23447.2	-385.2	-0.02	0.9558	1
RVBD_1139c	-	hypothetical protein	11	9	20789.2	17288.9	-3500.3	-0.27	0.5774	1
RVBD_1140	-	membrane protein	11	7	2531	4255.8	1724.8	0.75	0.4373	1
RVBD_1141c	-	enoyl-CoA hydratase EchA11	14	11	15232.7	14632.8	-599.9	-0.06	0.8827	1
RVBD_1142c	-	enoyl-CoA hydratase EchA10	8	6	12198.8	10121.9	-2076.9	-0.27	0.675	1
RVBD_1143	-	alpha-methylacyl-CoA racemase Mcr	16	15	28204.6	26750.3	-1454.3	-0.08	0.8614	1
RVBD_1144	-	3-hydroxyacyl-CoA dehydrogenase/3-hydroxy-2-methylbutyryl-CoA dehydrogenase	12	10	15454.5	14839.4	-615.1	-0.06	0.9014	1
RVBD_1144Ac	-	hypothetical protein	4	4	1192	1829.4	637.4	0.62	0.2962	1
RVBD_1145	-	transmembrane transporter MmpL13a	11	9	6156	8113.4	1957.4	0.4	0.4644	1
RVBD_1146	-	transmembrane transporter MmpL13b	23	21	39309.6	39472.3	162.7	0.01	0.9821	1
RVBD_1147	-	hypothetical protein	11	9	25046.6	17887.1	-7159.5	-0.49	0.4417	1
RVBD_1148c	-	hypothetical protein	23	18	15857.1	19169.4	3312.3	0.27	0.5595	1
RVBD_1151c	-	transcriptional regulator	9	8	23851.8	22621.2	-1230.6	-0.08	0.8684	1
RVBD_1152	-	transcriptional regulator	5	5	5700.9	6128.6	427.7	0.1	0.9235	1
RVBD_1153c	-	O-methyltransferase Omt	19	17	17909.6	19699.5	1790	0.14	0.7389	1
RVBD_1154c	-	hypothetical protein	16	15	17061.9	23368.8	6306.9	0.45	0.1961	1
RVBD_1155	-	pyridoxamine 5'-phosphate oxidase	12	11	17111.7	20172.9	3061.1	0.24	0.6237	1
RVBD_1156	-	hypothetical protein	12	12	7595.4	11073.4	3478	0.54	0.4943	1
RVBD_1157c	-	alanine and proline rich protein	8	4	4	3.9	-0.1	-0.02	0.9925	1
RVBD_1158c	-	alanine and proline rich protein	11	4	4	11.4	7.4	1.51	0.3349	1
RVBD_1159	-	mannosyltransferase PimE	29	24	4153	5180.9	1028	0.32	0.6422	1
RVBD_1159A	-	4a-hydroxytetrahydrobiopterin dehydratase	13	7	4450.5	4042.2	-408.3	-0.14	0.7895	1
RVBD_1160	-	mutator protein MutT2	5	4	1806.9	2320	513.2	0.36	0.577	1
RVBD_1161	-	respiratory nitrate reductase alpha chain NarG	75	67	50104.5	59840	9735.5	0.26	0.2551	1
RVBD_1162	-	respiratory nitrate reductase beta chain NarH	35	31	37237.5	41145.1	3907.5	0.14	0.6372	1
RVBD_1163	-	respiratory nitrate reductase delta chain NarJ	15	13	13944.4	13605.5	-338.9	-0.04	0.9348	1
RVBD_1164	-	respiratory nitrate reductase gamma chain NarI	19	19	24911.8	28869.8	3958	0.21	0.5415	1
RVBD_1165	-	GTP-binding protein TypA/BipA	16	14	16141.6	13476.1	-2665.4	-0.26	0.4729	1
RVBD_1166	-	lipoprotein LpqW	24	12	16.9	384	367.1	4.51	0.2399	1
RVBD_1167c	-	transcriptional regulator	9	4	4226.7	1990.9	-2235.9	-1.09	0.1799	1
RVBD_1168c	-	PPE family protein PPE17	16	16	18605.7	21035.8	2430	0.18	0.5965	1
RVBD_1169c	-	PE family protein lipase LipX	3	2	3557.3	5353.9	1796.6	0.59	0.2966	1
RVBD_1170	-	1-D-myo-inositol 2-acetamido-2-deoxy-alpha-D-glucopyranoside deacetylase	12	11	692.2	887.8	195.6	0.36	0.7557	1
RVBD_1171	-	hypothetical protein	7	7	10712.6	10490.1	-222.5	-0.03	0.9674	1
RVBD_1172c	-	PE family protein PE12	16	13	15734.4	12123.8	-3610.6	-0.38	0.3584	1
RVBD_1173	-	F420 biosynthesis protein FbiC	44	16	1532.5	1546.5	14	0.01	0.9877	1
RVBD_1174c	-	t-cell antigen	8	8	10922.7	12258	1335.3	0.17	0.7333	1
RVBD_1175c	-	NADPH dependent 2,4-dienoyl-CoA reductase FadH	27	24	29369.2	25021.4	-4347.7	-0.23	0.5438	1
RVBD_1176c	-	hypothetical protein	15	13	14369.9	14332.3	-37.7	0	0.9932	1
RVBD_1177	-	ferredoxin FdxC	7	1	1	0	-1	1.58	1	1
RVBD_1178	-	succinyldiaminopimelate transaminase	21	17	1676.9	2337.7	660.8	0.48	0.297	1
RVBD_1179c	-	hypothetical protein	41	32	34170.6	27927	-6243.5	-0.29	0.3117	1
RVBD_1181	-	polyketide beta-ketoacyl synthase Pks4	96	69	54626.2	41477.8	-13148.4	-0.4	0.0449	0.958
RVBD_1182	-	polyketide synthase associated protein PapA3	40	27	21038.8	18413	-2625.8	-0.19	0.5575	1
RVBD_1183	-	transmembrane transporter MmpL10	53	37	131570	117602	-13967.8	-0.16	0.4652	1
RVBD_1184c	-	exported protein	22	18	30204.3	28192.9	-2011.4	-0.1	0.788	1
RVBD_1185c	-	fatty-acid-AMP ligase FadD21	32	24	22586.6	19221.1	-3365.5	-0.23	0.43	1
RVBD_1186c	-	hypothetical protein	18	11	10715.3	4116.8	-6598.5	-1.38	0.0606	1
RVBD_1187	-	pyrroline-5-carboxylate dehydrogenase RocA	24	16	5834.3	6623.6	789.3	0.18	0.7678	1
RVBD_1188	-	proline dehydrogenase	21	14	8131.7	7636.5	-495.2	-0.09	0.8568	1
RVBD_1189	-	sigma-70 family RNA polymerase sigma factor SigI	10	10	5931.7	6326.8	395.2	0.09	0.8725	1
RVBD_1190	-	hypothetical protein	9	5	5255.2	6323.1	1067.9	0.27	0.7421	1
RVBD_1191	-	hypothetical protein	9	8	20969.6	16263.5	-4706.1	-0.37	0.5475	1
RVBD_1192	-	hypothetical protein	14	11	12548.2	9721.8	-2826.3	-0.37	0.8083	1
RVBD_1193	-	fatty-acid-CoA ligase FadD36	22	19	814.4	983.9	169.5	0.27	0.7183	1
RVBD_1194c	-	hypothetical protein	18	17	9290.6	6595	-2695.6	-0.49	0.3423	1
RVBD_1195	-	PE family protein PE13	6	6	13761.5	9993.1	-3768.4	-0.46	0.4461	1
RVBD_1196	-	PPE family protein PPE18	11	9	10207.2	16797.8	6590.7	0.72	0.1421	1
RVBD_1197	-	ESAT-6 like protein EsxK	4	4	3514.7	1272.3	-2242.4	-1.47	0.5849	1
RVBD_1198	-	ESAT-6 like protein EsxL	4	4	1172.6	1455.7	283.1	0.31	0.7398	1
RVBD_1199c	-	transposase	16	6	736.5	747.7	11.2	0.02	0.9861	1
RVBD_1200	-	MFS transporter, metabolite:H+ symporter (MHS) family protein	30	28	40487.6	39752.5	-735.1	-0.03	0.9377	1
RVBD_1201c	-	tetrahydrodipicolinate N-succinyltransferase DapD	12	6	2625.1	2968	342.9	0.18	0.9672	1
RVBD_1202	-	succinyl-diaminopimelate desuccinylase DapE	17	5	11.9	0	-11.9	-1.99	0.0157	0.6466
RVBD_1203c	-	hypothetical protein	8	6	5661.9	8002.6	2340.8	0.5	0.3534	1
RVBD_1204c	-	hypothetical protein	16	16	20566.9	28678.3	8111.4	0.48	0.0935	1
RVBD_1205	-	hypothetical protein	13	13	9078	10042.9	964.9	0.15	0.7587	1
RVBD_1206	-	fatty-acid-CoA ligase FadD6	38	32	10768.9	11132	363	0.05	0.8602	1
RVBD_1207	-	dihydropteroate synthase 2 FolP2	10	7	7300.2	7076.9	-223.3	-0.04	0.9514	1
RVBD_1208	-	glucosyl-3-phosphoglycerate synthase GpgS	14	4	3	2.8	-0.2	-0.12	1	1
RVBD_1209	-	DivIVA family protein	5	5	13297.9	19452.1	6154.2	0.55	0.1078	1
RVBD_1210	-	DNA-3-methyladenine glycosylase I TagA	11	9	67846.4	50369.2	-17477.1	-0.43	0.3457	1
RVBD_1211	-	hypothetical protein	5	4	46938	30158.6	-16779.4	-0.64	0.3839	1
RVBD_1212c	-	glycosyltransferase GlgA	32	27	111831	81310.4	-30520.4	-0.46	0.4781	1
RVBD_1213	-	glucose-1-phosphate adenylyltransferase GlgC	31	28	37154.9	75309.8	38154.8	1.02	0.0008	0.1242
RVBD_1214c	-	PE family protein PE14	5	5	4447	2573.9	-1873.2	-0.79	0.2068	1
RVBD_1215c	-	hydrolase	26	20	17120.1	16293.1	-827	-0.07	0.8733	1
RVBD_1216c	-	integral membrane protein	19	14	14785.6	16595.3	1809.7	0.17	0.6338	1
RVBD_1217c	-	antibiotic transporter permease	20	17	8758.7	8872.8	114	0.02	0.9596	1
RVBD_1218c	-	antibiotic transporter ATP-binding protein	6	5	5267.3	5108.2	-159.1	-0.04	0.9267	1
RVBD_1219c	-	transcriptional regulator	10	8	6714.8	7869.1	1154.4	0.23	0.6589	1
RVBD_1220c	-	methyltransferase	10	9	17825.7	17908.1	82.3	0.01	0.9892	1
RVBD_1221	-	RNA polymerase sigma factor SigE	18	6	3918.6	1427.8	-2490.8	-1.46	0.4379	1
RVBD_1222	-	anti-sigma factor RseA	3	2	7556	9293.8	1737.8	0.3	0.6871	1
RVBD_1223	-	serine protease HtrA	22	7	3459.1	3258.2	-200.9	-0.09	0.9239	1
RVBD_1224	-	protein TatB	6	5	1037.7	662.8	-374.9	-0.65	0.7139	1
RVBD_1225c	-	HAD hydrolase, family IIA	7	6	8911.1	7534.4	-1376.7	-0.24	0.6173	1
RVBD_1226c	-	transmembrane protein	15	13	19821.3	16729.5	-3091.8	-0.24	0.6208	1
RVBD_1227c	-	transmembrane protein	6	5	8988.4	3634.6	-5353.8	-1.31	0.0752	1
RVBD_1228	-	lipoprotein LpqX	9	8	23676.5	21761.8	-1914.7	-0.12	0.7992	1
RVBD_1229c	-	mrp protein	16	3	2461.3	1290.5	-1170.8	-0.93	0.7723	1
RVBD_1230c	-	membrane protein	20	16	16891.7	19503.5	2611.8	0.21	0.4804	1
RVBD_1231c	-	membrane protein	7	6	8956.6	7610.4	-1346.3	-0.23	0.6331	1
RVBD_1232c	-	hypothetical protein	11	10	22274.6	19535.5	-2739.1	-0.19	0.5944	1
RVBD_1233c	-	hypothetical protein	18	10	12701.1	9093.9	-3607.2	-0.48	0.4631	1
RVBD_1234	-	transmembrane protein	8	5	8093.1	8265.8	172.7	0.03	0.961	1
RVBD_1235	-	sugar-binding lipoprotein LpqY	30	18	15182.8	26552.1	11369.3	0.81	0.0406	0.9417
RVBD_1236	-	sugar-transport ABC transporter integral membrane protein SugA	19	15	19531	31032.9	11501.9	0.67	0.1743	1
RVBD_1237	-	sugar-transport ABC transporter integral membrane protein SugB	13	11	11849.8	18661.3	6811.5	0.66	0.2371	1
RVBD_1238	-	sugar-transport ABC transporter ATP-binding protein	26	20	12526.5	19953.4	7426.9	0.67	0.0579	1
RVBD_1239c	-	magnesium and cobalt transporter CorA	25	20	20084.6	16976.7	-3107.9	-0.24	0.3998	1
RVBD_1240	-	malate dehydrogenase Mdh	5	1	1	1.2	0.2	0.28	1	1
RVBD_1241	-	antitoxin VapB33	1	1	80.9	296.2	215.4	1.87	0.1007	1
RVBD_1242	-	toxin VapC33	10	9	5349.5	5480	130.4	0.03	0.9369	1
RVBD_1243c	-	PE-PGRS family protein PE_PGRS23	19	17	16102.4	21627.2	5524.8	0.43	0.165	1
RVBD_1244	-	lipoprotein LpqZ	8	8	9762.7	17264	7501.3	0.82	0.0171	0.6701
RVBD_1245c	-	oxidoreductase	15	14	17290	25148.7	7858.7	0.54	0.1721	1
RVBD_1246c	-	toxin RelE	7	6	11402.9	12567.3	1164.4	0.14	0.8286	1
RVBD_1247c	-	antitoxin RelB	6	5	1551.7	1648.2	96.4	0.09	0.9437	1
RVBD_1248c	-	2-oxoglutarate decarboxylase	46	13	13	3.7	-9.3	-1.82	0.0102	0.5057
RVBD_1249c	-	membrane protein	12	11	22684.3	17723.1	-4961.2	-0.36	0.5488	1
RVBD_1250	-	drug:H+ antiporter-2 (14 Spanner) (DHA2) family drug resistance MFS transporter	31	26	22906.3	22519.2	-387.1	-0.02	0.9567	1
RVBD_1251c	-	hypothetical protein	61	43	32116.6	38996.8	6880.2	0.28	0.3216	1
RVBD_1252c	-	lipoprotein LprE	8	7	9698.9	9868.9	169.9	0.03	0.9458	1
RVBD_1253	-	cold shock DeaD-box protein A DeaD	35	24	20060.9	16026.7	-4034.3	-0.32	0.5427	1
RVBD_1254	-	acyltransferase	27	6	111.4	56.8	-54.6	-0.97	0.619	1
RVBD_1255c	-	transcriptional regulator	10	9	6596.7	5064.1	-1532.6	-0.38	0.4261	1
RVBD_1256c	-	cytochrome P450 130 Cyp130	17	16	22480.6	20862.5	-1618	-0.11	0.7668	1
RVBD_1257c	-	glycolate oxidase subunit GlcD	16	11	9553.7	7728.5	-1825.2	-0.31	0.432	1
RVBD_1258c	-	H+ antiporter protein	23	21	26780	26894.6	114.6	0.01	0.9845	1
RVBD_1259	-	uracil DNA glycosylase UdgB	13	8	6148	3356	-2792.1	-0.87	0.2395	1
RVBD_1260	-	oxidoreductase	28	20	8229.7	10843.3	2613.6	0.4	0.4436	1
RVBD_1261c	-	deazaflavin-dependent nitroreductase	11	11	4050	6003.9	1953.9	0.57	0.1709	1
RVBD_1262c	-	hypothetical protein	5	4	1223.2	1504.9	281.7	0.3	0.6915	1
RVBD_1263	-	amidase AmiB2	22	21	22898.4	17625	-5273.4	-0.38	0.3475	1
RVBD_1264	-	adenylate cyclase	14	12	12275	12326.8	51.9	0.01	0.988	1
RVBD_1265	-	hypothetical protein	12	5	252.6	565.5	312.9	1.16	0.1529	1
RVBD_1266c	-	transmembrane serine/threonine-protein kinase H PknH	29	28	31910	32464.4	554.4	0.02	0.9271	1
RVBD_1267c	-	transcriptional regulator EmbR	20	15	28432.1	22539.5	-5892.6	-0.34	0.3928	1
RVBD_1268c	-	hypothetical protein	11	11	20056.6	19345.2	-711.4	-0.05	0.8913	1
RVBD_1269c	-	secreted protein	8	8	7153.7	6182.4	-971.3	-0.21	0.6285	1
RVBD_1270c	-	lipoprotein LprA	11	11	8432.5	5303.8	-3128.7	-0.67	0.1445	1
RVBD_1271c	-	secreted protein	7	5	7068	3604.7	-3463.3	-0.97	0.8424	1
RVBD_1272c	-	ABC transporter membrane protein	31	27	24081.5	15652	-8429.5	-0.62	0.117	1
RVBD_1273c	-	ABC transporter membrane protein	32	29	19226.8	16584.7	-2642.1	-0.21	0.5397	1
RVBD_1274	-	lipoprotein LprB	4	2	2	0	-2	0.58	0.4597	1
RVBD_1275	-	lipoprotein LprC	7	0	0	0	0	0	1	1
RVBD_1276c	-	phosphohistidine phosphatase	7	3	601.3	415.1	-186.2	-0.53	0.6255	1
RVBD_1277	-	hypothetical protein	20	18	11332.9	10624.5	-708.5	-0.09	0.763	1
RVBD_1278	-	hypothetical protein	28	21	10480.5	9498.6	-981.9	-0.14	0.8552	1
RVBD_1279	-	dehydrogenase FAD flavoprotein gmc oxidoreductase	30	26	39555.5	32780.2	-6775.2	-0.27	0.4448	1
RVBD_1280c	-	periplasmic oligopeptide-binding lipoprotein OppA	26	23	28721.5	16894.1	-11827.4	-0.77	0.0127	0.5892
RVBD_1281c	-	oligopeptide-transport ABC transporter ATP-binding protein OppD	28	20	17432.8	10864.9	-6567.9	-0.68	0.0619	1
RVBD_1282c	-	oligopeptide-transport ABC transporter integral membrane protein OppC	16	14	9443	11218.9	1775.9	0.25	0.9013	1
RVBD_1283c	-	oligopeptide-transport ABC transporter integral membrane protein OppB	21	13	5521	4948	-573	-0.16	0.7215	1
RVBD_1284	-	beta-carbonic anhydrase	7	5	7637	4409.7	-3227.3	-0.79	0.2839	1
RVBD_1285	-	sulfate adenylyltransferase subunit 2 CysD	16	5	1095.3	1231.3	135.9	0.17	0.8732	1
RVBD_1286	-	bifunctional enzyme CysN/CysC	35	22	2359.2	2163.9	-195.4	-0.12	0.8706	1
RVBD_1287	-	Rrf2 family protein	13	12	1330.1	2940.7	1610.7	1.14	0.0723	1
RVBD_1288	-	mycolyltransferase II	34	33	43725.6	50014	6288.4	0.19	0.3661	1
RVBD_1289	-	hypothetical protein	11	8	6961.9	5938.9	-1023	-0.23	0.75	1
RVBD_1290A	-	hypothetical protein	7	6	2534.8	3891.2	1356.4	0.62	0.3446	1
RVBD_1290c	-	hypothetical protein	34	33	38812.8	43634	4821.2	0.17	0.5261	1
RVBD_1291c	-	secreted protein	3	3	942.3	3045.1	2102.8	1.69	0.0696	1
RVBD_1292	-	arginyl-tRNA synthetase ArgS	34	10	7	6.2	-0.8	-0.17	0.7706	1
RVBD_1293	-	diaminopimelate decarboxylase LysA	27	10	4	7.5	3.5	0.9	0.308	1
RVBD_1294	-	homoserine dehydrogenase ThrA	24	5	5	2.5	-2.5	-0.99	0.3891	1
RVBD_1295	-	threonine synthase ThrC	21	6	5	18.2	13.2	1.87	0.7771	1
RVBD_1296	-	homoserine kinase ThrB	16	5	10	108.2	98.2	3.44	0.1932	1
RVBD_1297	-	transcription termination factor Rho	22	7	3	6.3	3.4	1.09	0.3435	1
RVBD_1298	-	50S ribosomal protein L31 RpmE	7	5	665.2	163.1	-502.1	-2.03	0.3955	1
RVBD_1299	-	peptide chain release factor 1 PrfA	14	5	5.9	1.2	-4.7	-2.32	0.0772	1
RVBD_1300	-	HemK protein	14	4	3.9	1.2	-2.8	-1.74	0.3175	1
RVBD_1301	-	Sua5/YciO/YrdC/YwlC family protein	11	4	4	0	-4	-0.42	0.0851	1
RVBD_1302	-	undecaprenyl-phosphate alpha-N-acetylglucosaminyltransferase Rfe	20	7	14304.1	8304.2	-5999.9	-0.78	0.7803	1
RVBD_1303	-	hypothetical protein	4	2	3	214.1	211.1	6.16	0.1824	1
RVBD_1304	-	ATP synthase A chain AtpB	12	4	242.8	527.5	284.7	1.12	0.5124	1
RVBD_1305	-	ATP synthase C chain AtpE	8	3	2	1.6	-0.4	-0.34	1	1
RVBD_1306	-	ATP synthase B chain AtpF	4	2	1	1.6	0.6	0.69	1	1
RVBD_1307	-	ATP synthase delta chain AtpH	20	7	7	1.2	-5.8	-2.57	0.0409	0.9433
RVBD_1308	-	ATP synthase alpha chain AtpA	27	8	707	1178	470.9	0.74	0.6497	1
RVBD_1309	-	ATP synthase gamma chain AtpG	19	6	524	430.7	-93.3	-0.28	0.8868	1
RVBD_1310	-	ATP synthase beta chain AtpD	19	5	3.9	1.3	-2.6	-1.59	0.3269	1
RVBD_1311	-	ATP synthase epsilon chain AtpC	2	0	0	0	0	0	1	1
RVBD_1312	-	secreted protein	10	9	721.6	716.7	-4.9	-0.01	0.9918	1
RVBD_1313c	-	transposase	16	10	2117.7	1493.3	-624.5	-0.5	0.482	1
RVBD_1314c	-	cob(I)yrinic acid a,c-diamide adenosyltransferase	15	11	16717.2	14902.1	-1815.1	-0.17	0.6396	1
RVBD_1315	-	UDP-N-acetylglucosamine 1-carboxyvinyltransferase MurA	17	6	9	4.3	-4.7	-1.05	0.2802	1
RVBD_1316c	-	methylated-DNA-protein-cysteine methyltransferase Ogt	9	5	6447.7	9109.9	2662.2	0.5	0.5849	1
RVBD_1317c	-	bifunctional regulatory protein and DNA repair enzyme AlkA	13	12	16035.5	15646.2	-389.3	-0.04	0.9276	1
RVBD_1318c	-	adenylate cyclase	18	17	28353.5	35005.9	6652.4	0.3	0.5015	1
RVBD_1319c	-	adenylate cyclase	28	28	40959.3	34691.8	-6267.5	-0.24	0.4969	1
RVBD_1320c	-	adenylate cyclase	29	27	28977.5	22041.5	-6936.1	-0.39	0.1934	1
RVBD_1321	-	hypothetical protein	12	11	9880.7	12056.1	2175.4	0.29	0.4972	1
RVBD_1322	-	hypothetical protein	6	5	8346.3	9431.3	1085	0.18	0.6435	1
RVBD_1322A	-	methylmalonyl-CoA epimerase	6	6	3965.6	3486.6	-479	-0.19	0.7458	1
RVBD_1323	-	acetyl-CoA acetyltransferase FadA4	15	13	4452.6	6192.4	1739.7	0.48	0.3726	1
RVBD_1324	-	thioredoxin	6	0	0	0	0	0	1	1
RVBD_1325c	-	PE-PGRS family protein PE_PGRS24	10	8	1037.3	1514.2	476.9	0.55	0.3248	1
RVBD_1326c	-	1,4-alpha-glucan-branching enzyme GlgB	42	12	11	6.7	-4.3	-0.71	0.2967	1
RVBD_1327c	-	glucanase GlgE	39	8	5	4.3	-0.7	-0.22	0.8288	1
RVBD_1328	-	glycogen phosphorylase GlgP	45	41	9234.2	3546.6	-5687.7	-1.38	0	0
RVBD_1329c	-	ATP-dependent DNA helicase DinG	24	18	17437.2	22687.3	5250.1	0.38	0.3268	1
RVBD_1330c	-	nicotinate phosphoribosyltransferase PncB1	23	21	37013	37423.5	410.4	0.02	0.9771	1
RVBD_1331	-	ATP-dependent Clp protease adapter protein ClpS	5	4	2720.9	3107.2	386.2	0.19	0.7471	1
RVBD_1332	-	transcriptional regulator	7	4	2524.3	1809.4	-714.9	-0.48	0.5897	1
RVBD_1333	-	hydrolase	13	9	22516.4	18883.9	-3632.6	-0.25	0.4997	1
RVBD_1334	-	hydrolase	12	12	53280.3	40034.3	-13246	-0.41	0.1866	1
RVBD_1335	-	sulfur carrier protein CysO	5	5	19326	25567.3	6241.3	0.4	0.5463	1
RVBD_1336	-	cysteine synthase B CysM	19	17	126476	99986.2	-26490	-0.34	0.1877	1
RVBD_1337	-	membrane protein	13	12	72197	68209.4	-3987.6	-0.08	0.8759	1
RVBD_1338	-	glutamate racemase MurI	17	4	10925.5	7862.8	-3062.7	-0.47	0.6674	1
RVBD_1339	-	hypothetical protein	20	12	44509.4	34257.4	-10251.9	-0.38	0.6212	1
RVBD_1340	-	ribonuclease RphA	13	4	980.8	982.9	2.1	0	0.996	1
RVBD_1341	-	nucleoside-triphosphatase	6	5	16807.8	15770.7	-1037.2	-0.09	0.9114	1
RVBD_1342c	-	integral membrane protein	5	1	1	0	-1	1.58	1	1
RVBD_1343c	-	lipoprotein LprD	12	1	1075.7	127	-948.6	-3.08	0.0677	1
RVBD_1344	-	acyl carrier protein MbtL	10	5	10474.2	8165.8	-2308.4	-0.36	0.8028	1
RVBD_1345	-	fatty acyl-AMP ligase MbtM	23	21	2610.8	3470.7	859.9	0.41	0.4725	1
RVBD_1346	-	acyl-CoA dehydrogenase MbtN	15	13	9545.6	11389.7	1844.1	0.25	0.5365	1
RVBD_1347c	-	lysine N-acetyltransferase MbtK	14	7	5	64.7	59.7	3.69	0.0185	0.675
RVBD_1348	-	iron-regulated transporter IrtA	38	15	477	103.9	-373.1	-2.2	0.0948	1
RVBD_1349	-	iron-regulated transporter IrtB	20	10	41.4	10.4	-31	-2	0.3856	1
RVBD_1350	-	3-oxoacyl-[acyl-carrier protein] reductase FabG2	15	11	3655.9	3682.8	27	0.01	0.9876	1
RVBD_1351	-	hypothetical protein	10	7	6344.5	6523.3	178.8	0.04	0.9348	1
RVBD_1352	-	hypothetical protein	6	6	9408.5	6793.8	-2614.7	-0.47	0.4741	1
RVBD_1353c	-	transcriptional regulator	13	10	3692.2	9482.9	5790.6	1.36	0.0234	0.7527
RVBD_1354c	-	diguanylate cyclase (GGDEF) domain-containing protein	43	35	24136.3	21899.1	-2237.2	-0.14	0.7961	1
RVBD_1355c	-	molybdopterin biosynthesis protein MoeY	40	27	11119	10122.7	-996.3	-0.14	0.7186	1
RVBD_1356c	-	hypothetical protein	28	18	15049.1	12832.3	-2216.8	-0.23	0.7488	1
RVBD_1357c	-	hypothetical protein	13	13	5010.3	6002.4	992.1	0.26	0.5447	1
RVBD_1358	-	transcriptional regulator	74	58	53031.2	53639.6	608.3	0.02	0.9293	1
RVBD_1359	-	transcriptional regulator	17	12	5750.8	5841.8	91	0.02	0.9637	1
RVBD_1360	-	oxidoreductase	14	12	30676	24145.5	-6530.5	-0.35	0.4996	1
RVBD_1361c	-	PPE family protein PPE19	15	13	21467	21996.8	529.8	0.04	0.9339	1
RVBD_1362c	-	membrane protein	15	12	10564.6	11938.1	1373.5	0.18	0.7249	1
RVBD_1363c	-	membrane protein	7	7	4954.7	7346.5	2391.8	0.57	0.359	1
RVBD_1364c	-	anti-anti-sigma factor	32	29	14279.9	12497	-1782.9	-0.19	0.6394	1
RVBD_1365c	-	anti-anti-sigma factor RsfA	5	5	4775.1	5036.9	261.8	0.08	0.9178	1
RVBD_1366	-	hypothetical protein	19	17	23079.6	16832.7	-6246.9	-0.46	0.1625	1
RVBD_1366A	-	hypothetical protein	6	6	5665.2	6131.8	466.6	0.11	0.8382	1
RVBD_1367c	-	hypothetical protein	17	12	16561.3	19070	2508.7	0.2	0.5586	1
RVBD_1368	-	lipoprotein LprF	8	7	21658.7	18325.6	-3333.1	-0.24	0.5429	1
RVBD_1369c	-	transposase	23	15	3844.9	4927.7	1082.7	0.36	0.5145	1
RVBD_1370c	-	transposase	4	4	1278.5	1667.9	389.4	0.38	0.6621	1
RVBD_1371	-	membrane protein	30	22	9020.5	7702.1	-1318.5	-0.23	0.6126	1
RVBD_1372	-	hypothetical protein	18	11	9346.9	6125.1	-3221.9	-0.61	0.4563	1
RVBD_1373	-	glycolipid sulfotransferase	19	19	35217.6	41671.3	6453.7	0.24	0.3709	1
RVBD_1374c	-	hypothetical protein	14	13	26763.2	23268.2	-3495	-0.2	0.5772	1
RVBD_1375	-	hypothetical protein	22	18	42656.1	40310	-2346.1	-0.08	0.8014	1
RVBD_1376	-	hypothetical protein	17	14	26370	26995.1	625.1	0.03	0.9417	1
RVBD_1377c	-	transferase	13	11	5957.6	8593.2	2635.6	0.53	0.2982	1
RVBD_1378c	-	hypothetical protein	24	16	27011.4	26248.2	-763.1	-0.04	0.8794	1
RVBD_1379	-	pyrimidine operon regulatory protein PyrR	7	1	0	7.2	7.2	1.27	0.1003	1
RVBD_1380	-	aspartate carbamoyltransferase PyrB	13	7	3.9	12.9	8.9	1.71	0.1883	1
RVBD_1381	-	dihydroorotase PyrC	11	2	2.9	0	-2.9	0.03	0.4637	1
RVBD_1382	-	exported or membrane protein	6	0	0	0	0	0	1	1
RVBD_1383	-	carbamoyl-phosphate synthase small chain CarA	13	6	6	3.9	-2.1	-0.61	0.5497	1
RVBD_1384	-	carbamoyl-phosphate synthase large chain CarB	46	16	15.9	5.3	-10.6	-1.59	0.0215	0.7265
RVBD_1385	-	orotidine 5'-phosphate decarboxylase PyrF	7	3	228.2	449.6	221.4	0.98	0.4664	1
RVBD_1386	-	PE family protein PE15	6	6	12662.8	17671.1	5008.3	0.48	0.475	1
RVBD_1387	-	PPE family protein PPE20	27	24	79690.5	75617.6	-4072.9	-0.08	0.7844	1
RVBD_1388	-	integration host factor MihF	7	1	2	0	-2	0.57	0.4112	1
RVBD_1389	-	guanylate kinase Gmk	6	2	2	1.2	-0.8	-0.75	1	1
RVBD_1390	-	DNA-directed RNA polymerase omega chain RpoZ	7	2	2	0	-2	0.56	0.4517	1
RVBD_1391	-	DNA/pantothenate metabolism flavoprotein Dfp	21	8	244.9	200	-44.8	-0.29	0.911	1
RVBD_1392	-	s-adenosylmethionine synthetase MetK	20	7	975.7	891.4	-84.2	-0.13	0.7856	1
RVBD_1393c	-	cyclohexanone monooxygenase	27	23	27902	28724.6	822.6	0.04	0.8986	1
RVBD_1394c	-	cytochrome P450 132 Cyp132	19	17	21634.6	26487	4852.4	0.29	0.4175	1
RVBD_1395	-	transcriptional regulator	18	14	10522.7	12645.4	2122.6	0.27	0.5456	1
RVBD_1396c	-	PE-PGRS family protein PE_PGRS25	12	11	7831.9	5067.5	-2764.4	-0.63	0.1798	1
RVBD_1397c	-	toxin VapC10	6	4	2068.9	2708.9	640.1	0.39	0.4285	1
RVBD_1398c	-	antitoxin VapB10	4	4	4196.8	4591.6	394.8	0.13	0.9427	1
RVBD_1399c	-	lipase LipH	16	12	6621.4	9835.2	3213.7	0.57	0.2414	1
RVBD_1400c	-	lipase LipH	19	14	9169.4	8620.6	-548.8	-0.09	0.8694	1
RVBD_1401	-	membrane protein	9	7	831	738.5	-92.6	-0.17	0.8938	1
RVBD_1402	-	primosomal protein N' PriA	28	9	10	6.3	-3.7	-0.67	0.3598	1
RVBD_1403c	-	methyltransferase	16	13	17606.4	14601.7	-3004.7	-0.27	0.5611	1
RVBD_1404	-	transcriptional regulator	9	6	3187.4	1727	-1460.4	-0.88	0.4618	1
RVBD_1405c	-	methyltransferase	12	11	37224.7	28028	-9196.6	-0.41	0.2823	1
RVBD_1406	-	methionyl-tRNA formyltransferase Fmt	9	4	3.9	1.6	-2.3	-1.31	0.4655	1
RVBD_1407	-	protein Fmu	21	17	6559	4941.8	-1617.2	-0.41	0.3364	1
RVBD_1408	-	ribulose-phosphate 3-epimerase Rpe	13	6	437.5	322.1	-115.3	-0.44	0.6401	1
RVBD_1409	-	bifunctional riboflavin biosynthesis protein RibG	14	5	588.7	389.5	-199.2	-0.6	0.923	1
RVBD_1410c	-	MFS drug efflux transporter P55	30	24	21803.4	13653.7	-8149.7	-0.68	0.2015	1
RVBD_1411c	-	lipoprotein LprG	9	8	3203.7	1647.1	-1556.6	-0.96	0.1364	1
RVBD_1412	-	riboflavin synthase alpha chain RibC	7	2	344.7	232.4	-112.3	-0.57	0.5729	1
RVBD_1413	-	hypothetical protein	6	6	15428.2	17652.2	2224	0.19	0.734	1
RVBD_1414	-	hypothetical protein	4	4	1135.6	1637.8	502.2	0.53	0.419	1
RVBD_1415	-	riboflavin biosynthesis protein RibA2	15	7	4	3.8	-0.2	-0.08	1	1
RVBD_1416	-	riboflavin synthase beta chain RibH	4	3	2	1.2	-0.8	-0.72	1	1
RVBD_1417	-	membrane protein	8	3	1036	1090.5	54.5	0.07	0.9578	1
RVBD_1418	-	lipoprotein LprH	15	13	16031.9	14364.1	-1667.8	-0.16	0.7742	1
RVBD_1419	-	lectin	6	5	4596.7	2861.9	-1734.8	-0.68	0.4105	1
RVBD_1420	-	excinuclease ABC UvrC	29	23	16512.8	7965.2	-8547.6	-1.05	0.0298	0.8517
RVBD_1421	-	nucleotide-binding protein	20	19	8590.9	12145.9	3555	0.5	0.1621	1
RVBD_1422	-	hypothetical protein	11	11	6320.2	5369.4	-950.7	-0.24	0.7143	1
RVBD_1423	-	transcriptional regulator WhiA	12	9	62.5	1244.7	1182.2	4.32	0.2382	1
RVBD_1424c	-	membrane protein	19	15	12595.7	15830.4	3234.7	0.33	0.4732	1
RVBD_1425	-	diacylglycerol acyltransferase	19	17	36990.1	37847.2	857	0.03	0.9327	1
RVBD_1426c	-	esterase LipO	29	21	14294.9	13603.7	-691.2	-0.07	0.8549	1
RVBD_1427c	-	long-chain-fatty-acid-CoA ligase FadD12	20	18	17173.7	14756.3	-2417.4	-0.22	0.5603	1
RVBD_1428c	-	hypothetical protein	18	15	17847.8	17776.3	-71.5	-0.01	0.985	1
RVBD_1429	-	hypothetical protein	23	17	18882.3	17955.7	-926.5	-0.07	0.8254	1
RVBD_1430	-	PE family protein PE16	40	36	28741.9	37871.3	9129.4	0.4	0.137	1
RVBD_1431	-	hypothetical protein	25	21	25649.6	20133	-5516.6	-0.35	0.3352	1
RVBD_1432	-	oxidoreductase	16	8	11	10.4	-0.6	-0.09	0.9315	1
RVBD_1433	-	exported protein	18	16	29334.7	33043.8	3709.1	0.17	0.4193	1
RVBD_1434	-	hypothetical protein	1	1	2057.6	99	-1958.6	-4.38	0.1988	1
RVBD_1435c	-	proline and glycine and valine rich secreted protein	16	10	7220.4	9556	2335.6	0.4	0.353	1
RVBD_1436	-	glyceraldehyde 3-phosphate dehydrogenase Gap	15	2	158	178.6	20.6	0.18	0.8384	1
RVBD_1437	-	phosphoglycerate kinase Pgk	16	4	3	1.6	-1.4	-0.91	0.5972	1
RVBD_1438	-	triosephosphate isomerase Tpi	16	7	5	3.7	-1.3	-0.44	0.7008	1
RVBD_1439c	-	hypothetical protein	7	7	9735.2	7851.6	-1883.7	-0.31	0.4542	1
RVBD_1440	-	preprotein translocase subunit SecG	6	1	502.1	285.8	-216.2	-0.81	0.1661	1
RVBD_1441c	-	PE-PGRS family protein PE_PGRS26	18	16	10577.8	9623.3	-954.5	-0.14	0.8242	1
RVBD_1442	-	biotin sulfoxide reductase BisC	38	34	31689.7	36448.6	4758.9	0.2	0.4397	1
RVBD_1443c	-	hypothetical protein	2	2	543.1	721.7	178.6	0.41	0.5422	1
RVBD_1444c	-	hypothetical protein	4	4	9012.3	9027.8	15.5	0	0.9959	1
RVBD_1445c	-	6-phosphogluconolactonase DevB (6PGL)	10	5	3828.2	4260.7	432.5	0.15	0.8044	1
RVBD_1446c	-	OXPP cycle protein OpcA	14	11	5429.8	3220.8	-2209	-0.75	0.3284	1
RVBD_1447c	-	glucose-6-phosphate 1-dehydrogenase Zwf2	19	17	6285	7021.5	736.5	0.16	0.8981	1
RVBD_1448c	-	transaldolase Tal	14	11	7988.5	8329.1	340.6	0.06	0.9203	1
RVBD_1449c	-	transketolase Tkt	25	10	8	6.4	-1.5	-0.31	0.6702	1
RVBD_1450c	-	PE-PGRS family protein PE_PGRS27	32	22	17932.5	13845.1	-4087.4	-0.37	0.6359	1
RVBD_1451	-	cytochrome C oxidase assembly factor CtaB	16	5	6	4.1	-1.9	-0.56	0.6813	1
RVBD_1452c	-	PE-PGRS family protein PE_PGRS28	17	14	11276.8	9886.8	-1389.9	-0.19	0.66	1
RVBD_1453	-	transcriptional activator	12	12	18409.7	17158.7	-1251	-0.1	0.7723	1
RVBD_1454c	-	quinone reductase Qor	17	15	25429.8	36629.7	11199.9	0.53	0.0671	1
RVBD_1455	-	hypothetical protein	13	10	30974.1	15603.4	-15370.6	-0.99	0.2364	1
RVBD_1456c	-	cytochrome C oxidase subunit XV assembly protein	15	5	3385.9	3032.2	-353.7	-0.16	0.8211	1
RVBD_1457c	-	ABC transporter efflux protein DrrB	8	6	7	5.3	-1.7	-0.41	0.6329	1
RVBD_1458c	-	antibiotic transporter ATP-binding protein	14	5	8.1	1.6	-6.5	-2.36	0.2188	1
RVBD_1459c	-	integral membrane protein	26	12	8197.9	6203.5	-1994.4	-0.4	0.6209	1
RVBD_1460	-	transcriptional regulator	9	6	568.1	548.9	-19.2	-0.05	0.97	1
RVBD_1461	-	Fe-S cluster assembly protein SufB	59	6	8.9	0	-8.9	-1.58	0.0022	0.2537
RVBD_1462	-	Fe-S cluster assembly protein SufD	14	4	4	0	-4	-0.41	0.0783	1
RVBD_1463	-	ABC transporter ATP-binding protein	12	5	2	3.7	1.7	0.89	0.3978	1
RVBD_1464	-	cysteine desulfurase Csd	15	7	4	5.3	1.2	0.39	0.6886	1
RVBD_1465	-	nitrogen fixation protein	8	5	6	67.9	61.9	3.51	0.2018	1
RVBD_1466	-	hypothetical protein	1	0	0	0	0	0	1	1
RVBD_1467c	-	acyl-CoA dehydrogenase FadE15	28	26	35141	32818.4	-2322.6	-0.1	0.6923	1
RVBD_1468c	-	PE-PGRS family protein PE_PGRS29	10	10	4902.4	4478.1	-424.4	-0.13	0.8198	1
RVBD_1469	-	cation transporter P-type ATPase CtpD	21	17	15426.8	11774.9	-3652	-0.39	0.3574	1
RVBD_1470	-	thioredoxin TrxA	5	5	6126.8	4283.1	-1843.7	-0.52	0.4707	1
RVBD_1471	-	thioredoxin TrxB1	2	1	148	502.6	354.5	1.76	0.0321	0.8749
RVBD_1472	-	enoyl-CoA hydratase EchA12	16	15	19836.6	21496.5	1659.8	0.12	0.7768	1
RVBD_1473	-	ABC transporter ATP-binding protein	26	18	1197.5	1308.9	111.3	0.13	0.9029	1
RVBD_1473A	-	transcriptional regulator	4	3	4394.9	3357.7	-1037.2	-0.39	0.6927	1
RVBD_1474c	-	transcriptional regulator	8	4	1534	2112.4	578.4	0.46	0.6253	1
RVBD_1475c	-	iron-regulated aconitate hydratase Can	56	21	167.3	217.2	49.9	0.38	0.7848	1
RVBD_1476	-	membrane protein	7	3	370.7	776.6	405.9	1.07	0.591	1
RVBD_1477	-	peptidoglycan hydrolase	25	9	2702.8	2509.2	-193.5	-0.11	0.882	1
RVBD_1478	-	invasion-associated protein	9	8	15035.7	15980.1	944.5	0.09	0.8602	1
RVBD_1479	-	transcriptional regulator MoxR1	14	6	9	0	-9	-1.58	0.0032	0.287
RVBD_1480	-	hypothetical protein	6	2	468.4	52.3	-416.1	-3.16	0.3466	1
RVBD_1481	-	membrane protein	14	8	2330.2	3416.8	1086.6	0.55	0.6529	1
RVBD_1482c	-	hypothetical protein	14	12	24173.5	21432.5	-2741	-0.17	0.7127	1
RVBD_1483	-	3-oxoacyl-[acyl-carrier-protein] reductase FabG	13	3	1	2.9	1.9	1.51	0.4667	1
RVBD_1484	-	NADH-dependent enoyl-[acyl-carrier-protein] reductase InhA	10	2	2.9	1.6	-1.4	-0.9	0.7273	1
RVBD_1485	-	ferrochelatase HemZ	25	11	11	6.8	-4.2	-0.69	0.4145	1
RVBD_1486c	-	hypothetical protein	8	7	14991.8	14548.1	-443.7	-0.04	0.9154	1
RVBD_1487	-	hypothetical protein	4	4	8147.7	6778.4	-1369.3	-0.27	0.6793	1
RVBD_1488	-	exported protein	16	14	27133.8	37319.5	10185.7	0.46	0.1107	1
RVBD_1489	-	hypothetical protein	7	7	22961.5	18107.7	-4853.7	-0.34	0.5101	1
RVBD_1489A	-	methylmalonyl-CoA mutase	4	4	5164.7	5098.1	-66.6	-0.02	0.9734	1
RVBD_1490	-	membrane protein	38	19	11754.8	10913	-841.8	-0.11	0.8448	1
RVBD_1491c	-	TVP38/TMEM64 family membrane protein	15	12	26719.6	24410.3	-2309.3	-0.13	0.7482	1
RVBD_1492	-	methylmalonyl-CoA mutase small subunit MutA	17	15	12002.2	13186.9	1184.7	0.14	0.7629	1
RVBD_1493	-	methylmalonyl-CoA mutase large subunit MutB	32	27	37516.2	36336.7	-1179.5	-0.05	0.8755	1
RVBD_1494	-	antitoxin MazE4	8	5	961.9	1609.6	647.6	0.74	0.4792	1
RVBD_1495	-	toxin MazF4	6	6	5342.6	2890.3	-2452.3	-0.89	0.3588	1
RVBD_1496	-	LAO/AO transporter ATPase	10	10	10220.6	6824.2	-3396.4	-0.58	0.4393	1
RVBD_1497	-	esterase LipL	17	14	23775.7	22929.6	-846.1	-0.05	0.8942	1
RVBD_1498A	-	hypothetical protein	3	3	8127.2	6336	-1791.2	-0.36	0.4279	1
RVBD_1498c	-	methyltransferase	16	14	21751.6	25966.5	4214.9	0.26	0.4071	1
RVBD_1499	-	hypothetical protein	5	5	10568	11133.3	565.3	0.08	0.8523	1
RVBD_1500	-	glycosyltransferase	37	15	22958.6	18372.5	-4586.1	-0.32	0.5319	1
RVBD_1501	-	hypothetical protein	34	21	15763.1	12591.9	-3171.2	-0.32	0.4893	1
RVBD_1502	-	hypothetical protein	33	13	3549	1579.5	-1969.5	-1.17	0.2689	1
RVBD_1505c	-	sialic acid O-acetyltransferase NeuD	26	13	8080.4	7151.8	-928.6	-0.18	0.7471	1
RVBD_1506c	-	hypothetical protein	20	10	5586.5	4200.7	-1385.8	-0.41	0.4364	1
RVBD_1507A	-	hypothetical protein	18	7	5203.1	5604.2	401.1	0.11	0.8677	1
RVBD_1507c	-	hypothetical protein	29	8	8359	4631	-3728	-0.85	0.2111	1
RVBD_1508A	-	hypothetical protein	15	11	13439.9	10047.9	-3391.9	-0.42	0.3872	1
RVBD_1508c	-	membrane protein	43	41	90870.6	80191.1	-10679.5	-0.18	0.4535	1
RVBD_1509	-	hypothetical protein	21	14	15460.9	11624.2	-3836.7	-0.41	0.4859	1
RVBD_1510	-	membrane protein	22	22	25601.1	40688.2	15087.1	0.67	0.3276	1
RVBD_1511	-	GDP-D-mannose dehydratase GmdA	20	18	30579.5	31948.7	1369.1	0.06	0.8235	1
RVBD_1512	-	nucleotide-sugar epimerase EpiA	13	9	321.7	139.9	-181.7	-1.2	0.1657	1
RVBD_1513	-	FkbM family methyltransferase	7	7	3312.4	4250.5	938.1	0.36	0.4985	1
RVBD_1514c	-	hypothetical protein	18	14	13568	7401.4	-6166.6	-0.87	0.2533	1
RVBD_1515c	-	hypothetical protein	18	12	6514.6	8672.3	2157.7	0.41	0.2195	1
RVBD_1516c	-	sugar transferase	11	10	7819.4	5908.2	-1911.2	-0.4	0.487	1
RVBD_1517	-	hypothetical protein	15	9	3568.5	6227.2	2658.7	0.8	0.1328	1
RVBD_1518	-	hypothetical protein	13	11	12208.2	10692.4	-1515.7	-0.19	0.768	1
RVBD_1519	-	hypothetical protein	3	2	5376.6	4944.8	-431.8	-0.12	0.8498	1
RVBD_1520	-	sugar transferase	25	23	53305.9	53151.3	-154.7	0	0.9859	1
RVBD_1521	-	fatty-acid-AMP ligase FadD25	39	31	33275.1	32094.2	-1180.9	-0.05	0.9369	1
RVBD_1522c	-	transmembrane transporter MmpL12	53	39	46961.5	42791.9	-4169.6	-0.13	0.4968	1
RVBD_1523	-	methyltransferase	21	18	22706.9	26500.1	3793.1	0.22	0.4543	1
RVBD_1524	-	glycosyltransferase	14	11	5972.5	4563.7	-1408.7	-0.39	0.5542	1
RVBD_1525	-	rhamnosyl transferase WbbL2	22	17	5310.5	5622.1	311.6	0.08	0.8284	1
RVBD_1526c	-	glycosyltransferase	19	16	14087.3	16506.7	2419.4	0.23	0.5402	1
RVBD_1527c	-	polyketide synthase Pks5	100	81	83899.6	84836.1	936.4	0.02	0.9306	1
RVBD_1528c	-	polyketide synthase associated protein PapA4	7	6	13700.1	12557.3	-1142.8	-0.13	0.9014	1
RVBD_1529	-	fatty-acid-AMP ligase FadD24	37	28	23969.9	19922.7	-4047.2	-0.27	0.5213	1
RVBD_1530	-	alcohol dehydrogenase Adh	25	21	3930.6	5810.3	1879.7	0.56	0.3481	1
RVBD_1531	-	4-carboxymuconolactone decarboxylase	8	5	7889	6596.6	-1292.4	-0.26	0.7184	1
RVBD_1532c	-	hypothetical protein	5	4	2170.3	3163.4	993.1	0.54	0.4149	1
RVBD_1533	-	hypothetical protein	11	9	9001.9	5372.8	-3629.1	-0.74	0.4142	1
RVBD_1534	-	transcriptional regulator	17	15	4615.7	3325.4	-1290.3	-0.47	0.5927	1
RVBD_1535	-	hypothetical protein	5	5	5933	6240.6	307.6	0.07	0.88	1
RVBD_1536	-	isoleucyl-tRNA synthetase IleS	79	26	20.9	11.8	-9.1	-0.82	0.1294	1
RVBD_1537	-	DNA polymerase IV DinX	14	12	8527.4	8328.7	-198.8	-0.03	0.9291	1
RVBD_1538c	-	L-asparaginase AnsA	14	13	11030.1	5042.9	-5987.1	-1.13	0.0074	0.4387
RVBD_1539	-	lipoprotein signal peptidase LspA	9	1	59.1	39.4	-19.7	-0.59	0.8018	1
RVBD_1540	-	RluA family pseudouridine synthase	14	1	1	0	-1	1.62	1	1
RVBD_1541c	-	lipoprotein LprI	9	9	2899.3	3553.3	653.9	0.29	0.6438	1
RVBD_1542c	-	hemoglobin GlbN	8	8	3146.5	3958.8	812.3	0.33	0.5425	1
RVBD_1543	-	fatty-acyl-CoA reductase	15	14	41787.4	39854.6	-1932.8	-0.07	0.795	1
RVBD_1544	-	ketoacyl reductase	11	10	19422	26567.1	7145.1	0.45	0.3137	1
RVBD_1545	-	hypothetical protein	4	2	4635.4	5211.7	576.3	0.17	0.6906	1
RVBD_1546	-	hypothetical protein	6	5	14959.9	20738.6	5778.7	0.47	0.1756	1
RVBD_1547	-	DNA polymerase III alpha subunit DnaE1	48	7	1271.6	456.1	-815.5	-1.48	0.7181	1
RVBD_1548c	-	PPE family protein PPE21	42	27	24560.4	25366.4	806	0.05	0.8673	1
RVBD_1549	-	fatty-acid-CoA ligase	9	8	14771.2	15829.8	1058.6	0.1	0.8558	1
RVBD_1550	-	fatty-acid-CoA ligase FadD11	28	27	50883.2	45166.8	-5716.3	-0.17	0.5213	1
RVBD_1551	-	glycerol-3-phosphate O-acyltransferase PlsB1	33	27	42726.2	30899.6	-11826.6	-0.47	0.1786	1
RVBD_1552	-	fumarate reductase FrdA	41	32	23183.5	22736.2	-447.3	-0.03	0.9271	1
RVBD_1553	-	fumarate reductase FrdB	14	12	23462.3	12388.3	-11074	-0.92	0.0918	1
RVBD_1554	-	fumarate reductase FrdC	10	9	7836.1	9780.8	1944.7	0.32	0.256	1
RVBD_1555	-	fumarate reductase FrdD	5	5	9307.7	7390.2	-1917.4	-0.33	0.4528	1
RVBD_1556	-	regulatory protein	13	11	20910.5	13808	-7102.5	-0.6	0.3288	1
RVBD_1557	-	transmembrane transporter MmpL6	21	18	22788.1	20947.6	-1840.5	-0.12	0.732	1
RVBD_1558	-	deazaflavin-dependent nitroreductase	10	9	18784.1	19510.3	726.2	0.05	0.9263	1
RVBD_1559	-	threonine dehydratase IlvA	27	12	871.2	1292.7	421.5	0.57	0.6513	1
RVBD_1560	-	antitoxin VapB11	2	2	31.4	424.6	393.2	3.76	0.1241	1
RVBD_1561	-	toxin VapC11	9	8	4586.2	3829	-757.1	-0.26	0.6138	1
RVBD_1562c	-	maltooligosyltrehalose trehalohydrolase TreZ	37	27	14919.5	13534	-1385.4	-0.14	0.7183	1
RVBD_1563c	-	maltooligosyltrehalose synthase TreY	36	22	4150.6	3101	-1049.7	-0.42	0.4372	1
RVBD_1564c	-	maltooligosyltrehalose synthase TreX	49	37	48630.4	29517	-19113.4	-0.72	0.0193	0.6773
RVBD_1565c	-	hypothetical protein	46	39	3662.7	6737.1	3074.4	0.88	0.0145	0.6361
RVBD_1566c	-	invasion-associated protein	10	10	3500.5	6738	3237.4	0.94	0.0303	0.8517
RVBD_1567c	-	membrane protein	9	7	24441.4	34132.7	9691.4	0.48	0.1998	1
RVBD_1568	-	adenosylmethionine-8-amino-7-oxononanoate aminotransferase BioA	16	14	23180.2	18222.8	-4957.4	-0.35	0.3644	1
RVBD_1569	-	8-amino-7-oxononanoate synthase BioF1	7	7	8848.2	4935.4	-3912.8	-0.84	0.6066	1
RVBD_1570	-	dethiobiotin synthetase BioD	2	1	2736.3	2696.5	-39.8	-0.02	1	1
RVBD_1571	-	hypothetical protein	3	2	42.5	8.9	-33.6	-2.25	0.5597	1
RVBD_1572c	-	hypothetical protein	1	1	1	24.9	23.9	4.64	0.3952	1
RVBD_1573	-	prophage PhiRv1 protein	1	1	2	0	-2	0.56	1	1
RVBD_1574	-	prophage PhiRv1 protein	15	8	3245.5	2863.7	-381.7	-0.18	0.7908	1
RVBD_1576c	-	prophage PhiRv1 protein	9	4	762.2	1288.5	526.3	0.76	0.4631	1
RVBD_1577c	-	prophage PhiRv1 protein	8	6	1363.5	1700	336.4	0.32	0.7529	1
RVBD_1578c	-	prophage PhiRv1 protein	4	3	901.3	1678.8	777.4	0.9	0.3803	1
RVBD_1579c	-	prophage PhiRv1 protein	4	4	3148.5	3487.8	339.3	0.15	0.7512	1
RVBD_1580c	-	prophage PhiRv1 protein	5	4	11386.9	10476.7	-910.2	-0.12	0.8456	1
RVBD_1581c	-	prophage PhiRv1 protein	7	6	8478.6	8605.2	126.6	0.02	0.9754	1
RVBD_1582c	-	prophage PhiRv1 protein	32	27	8771.2	8393.2	-377.9	-0.06	0.8795	1
RVBD_1583c	-	prophage PhiRv1 protein	5	4	3569.7	2277.3	-1292.4	-0.65	0.4228	1
RVBD_1584c	-	prophage PhiRv1 protein	3	2	9719.7	7427.1	-2292.5	-0.39	0.575	1
RVBD_1585c	-	prophage PhiRv1 protein	8	7	2712.7	2007.1	-705.6	-0.43	0.4992	1
RVBD_1586c	-	prophage PhiRv1 integrase	24	22	22484.4	25571.8	3087.4	0.19	0.6594	1
RVBD_1587c	-	13E12 repeat family protein	15	12	7216.6	9187.3	1970.7	0.35	0.3425	1
RVBD_1588c	-	13E12 repeat family protein	11	5	39.1	6.6	-32.5	-2.57	0.0909	1
RVBD_1589	-	biotin synthetase BioB	11	9	14968.5	16768.9	1800.4	0.16	0.7383	1
RVBD_1590	-	hypothetical protein	3	3	3546.5	5447.5	1901	0.62	0.1782	1
RVBD_1591	-	transmembrane protein	9	8	12211.6	18253.7	6042.1	0.58	0.156	1
RVBD_1592c	-	triacylglycerol lipase	26	18	146.5	419.6	273.1	1.52	0.0181	0.675
RVBD_1593c	-	hypothetical protein	12	11	9198.3	11939.4	2741	0.38	0.472	1
RVBD_1594	-	quinolinate synthetase NadA	10	2	1	1.2	0.2	0.22	1	1
RVBD_1595	-	l-aspartate oxidase NadB	24	11	8.9	9.6	0.7	0.11	0.8767	1
RVBD_1596	-	nicotinate-nucleotide pyrophosphatase NadC	15	7	3895.3	4771	875.7	0.29	0.7726	1
RVBD_1597	-	hypothetical protein	12	9	16248.5	14599.3	-1649.2	-0.15	0.7597	1
RVBD_1598c	-	deazaflavin-dependent nitroreductase	8	6	7026.7	7458.7	432	0.09	0.8554	1
RVBD_1599	-	histidinol dehydrogenase HisD	16	8	8.9	4.7	-4.2	-0.91	0.2402	1
RVBD_1600	-	histidinol-phosphate aminotransferase HisC1	26	9	1206.6	331.3	-875.3	-1.86	0.655	1
RVBD_1601	-	imidazole glycerol phosphate dehydratase HisB	15	5	4.9	1.3	-3.6	-1.9	0.1666	1
RVBD_1602	-	amidotransferase HisH	11	3	32.3	72.8	40.5	1.17	0.5571	1
RVBD_1603	-	phosphoribosyl isomerase A HisA	10	2	852.4	692	-160.4	-0.3	0.7862	1
RVBD_1604	-	inositol-1-monophosphatase ImpA	13	10	4509.6	5160.3	650.6	0.19	0.7381	1
RVBD_1605	-	imidazole glycerol phosphate synthase subunit HisF	6	0	0	0	0	0	1	1
RVBD_1606	-	phosphoribosyl-AMP 1,6 cyclohydrolase HisI	9	4	787.9	813.3	25.4	0.05	0.9503	1
RVBD_1607	-	ionic transporter integral membrane protein ChaA	10	10	6215.3	7765.7	1550.4	0.32	0.577	1
RVBD_1608c	-	peroxidoxin BcpB	8	6	4954.4	3022.8	-1931.6	-0.71	0.1414	1
RVBD_1609	-	anthranilate synthase component 1 TrpE	26	10	663.8	672.9	9.1	0.02	0.9922	1
RVBD_1610	-	membrane protein	6	6	659.8	671.2	11.4	0.02	0.9837	1
RVBD_1611	-	indole-3-glycerol phosphate synthase TrpC	12	5	16.1	0	-16.1	-2.42	0.006	0.4104
RVBD_1612	-	tryptophan synthase beta subunit TrpB	18	2	2	1.6	-0.4	-0.31	1	1
RVBD_1613	-	tryptophan synthase alpha subunit TrpA	19	5	5	2.4	-2.6	-1.07	0.4872	1
RVBD_1614	-	prolipoprotein diacylglyceryl transferase Lgt	27	10	2432.4	1732.8	-699.6	-0.49	0.7303	1
RVBD_1615	-	membrane protein	10	8	9338.6	14553.1	5214.4	0.64	0.2435	1
RVBD_1616	-	hypothetical protein	12	11	11459.3	16332.6	4873.3	0.51	0.1898	1
RVBD_1617	-	pyruvate kinase PykA	14	7	182.5	3.1	-179.4	-5.86	0.1374	1
RVBD_1618	-	acyl-CoA thioesterase II TesB1	19	19	24562.7	25440.2	877.6	0.05	0.8906	1
RVBD_1619	-	hypothetical protein	23	17	7799.4	6947.5	-851.9	-0.17	0.7505	1
RVBD_1620c	-	thiol reductant ABC exporter subunit CydC	19	11	661.6	175.5	-486.1	-1.91	0.2472	1
RVBD_1621c	-	thiol reductant ABC exporter subunit CydD	20	13	3402.2	264.5	-3137.7	-3.69	0.0884	1
RVBD_1622c	-	integral membrane cytochrome D ubiquinol oxidase CydB	22	14	5365.5	1148.9	-4216.6	-2.22	0.0468	0.9606
RVBD_1623c	-	integral membrane cytochrome D ubiquinol oxidase CydA	22	11	4067.7	519	-3548.7	-2.97	0.0038	0.3007
RVBD_1624c	-	membrane protein	6	5	13256.3	13846.3	590	0.06	0.8615	1
RVBD_1625c	-	adenylyl cyclase Cya	32	28	57524.2	49128.1	-8396.1	-0.23	0.4582	1
RVBD_1626	-	two-component system transcriptional regulator	5	4	54.4	52.1	-2.2	-0.06	0.95	1
RVBD_1627c	-	nonspecific lipid-transfer protein	19	15	15438.4	9251.2	-6187.2	-0.74	0.0832	1
RVBD_1628c	-	hypothetical protein	7	5	16793	11193.9	-5599	-0.59	0.3846	1
RVBD_1629	-	DNA polymerase I PolA	42	16	756.6	843.7	87.2	0.16	0.851	1
RVBD_1630	-	30S ribosomal protein S1 RpsA	17	5	4	1.3	-2.7	-1.6	0.3239	1
RVBD_1631	-	dephospho-CoA kinase CoaE	12	4	4	2.4	-1.7	-0.77	0.6385	1
RVBD_1632c	-	hypothetical protein	12	12	25197.6	17938.6	-7259	-0.49	0.1806	1
RVBD_1633	-	excinuclease ABC UvrB	38	34	21887.5	15706.4	-6181.1	-0.48	0.0645	1
RVBD_1634	-	drug efflux membrane protein	33	32	62854.8	68414.6	5559.8	0.12	0.7761	1
RVBD_1635c	-	polyprenol phosphomannose-dependent ManLAM-capping mannosyltransferase	32	31	78576.6	61281.2	-17295.4	-0.36	0.1769	1
RVBD_1636	-	iron-regulated universal stress protein family protein	10	2	2	0	-2	0.6	0.4504	1
RVBD_1637c	-	hypothetical protein	14	12	22843	19077	-3766	-0.26	0.6674	1
RVBD_1638	-	excinuclease ABC UvrA	39	36	9886.9	6373.9	-3513	-0.63	0.1533	1
RVBD_1638A	-	hypothetical protein	5	2	2053	654.8	-1398.2	-1.65	0.2874	1
RVBD_1639c	-	hypothetical protein	18	14	18366.9	23105.8	4739	0.33	0.5322	1
RVBD_1640c	-	lysyl-tRNA synthetase 2 LysX	65	54	216251	25741.7	-190509	-3.07	0	0
RVBD_1641	-	initiation factor if-3 InfC	12	6	6	1.3	-4.7	-2.19	0.0831	1
RVBD_1642	-	50S ribosomal protein L35 RpmI	2	1	9.1	2.5	-6.6	-1.87	1	1
RVBD_1643	-	50S ribosomal protein L20 RplT	8	2	2	2.5	0.5	0.33	0.7053	1
RVBD_1644	-	23S rRNA methyltransferase TsnR	11	10	34800.3	29327.5	-5472.7	-0.25	0.6101	1
RVBD_1645c	-	hypothetical protein	23	23	49692.4	52721.1	3028.7	0.09	0.7817	1
RVBD_1646	-	PE family protein PE17	19	18	38019.7	32643	-5376.7	-0.22	0.6221	1
RVBD_1647	-	adenylate cyclase	12	11	18518.4	15790.6	-2727.8	-0.23	0.5441	1
RVBD_1648	-	transmembrane protein	13	12	18865.5	14351	-4514.4	-0.39	0.6125	1
RVBD_1649	-	phenylalanyl-tRNA synthetase alpha chain PheS	13	7	3	5.1	2.1	0.76	0.429	1
RVBD_1650	-	phenylalanyl-tRNA synthetase beta chain PheT	37	13	10	7.6	-2.4	-0.4	0.5313	1
RVBD_1651c	-	PE-PGRS family protein PE_PGRS30	54	49	52285.9	46520.1	-5765.8	-0.17	0.5331	1
RVBD_1652	-	N-acetyl-gamma-glutamyl-phosphate reductase ArgC	15	1	0	1.2	1.2	-1.34	1	1
RVBD_1653	-	glutamate N-acetyltransferase ArgJ	5	5	97.1	55.4	-41.7	-0.81	0.5787	1
RVBD_1654	-	acetylglutamate kinase ArgB	4	1	1	0	-1	1.58	1	1
RVBD_1655	-	acetylornithine aminotransferase ArgD	10	4	6	5.3	-0.8	-0.19	0.7914	1
RVBD_1656	-	ornithine carbamoyltransferase, anabolic ArgF	5	0	0	0	0	0	1	1
RVBD_1657	-	arginine repressor ArgR	4	3	4848.3	4349	-499.3	-0.16	0.8427	1
RVBD_1658	-	argininosuccinate synthase ArgG	18	9	8	5	-3	-0.68	0.3765	1
RVBD_1659	-	argininosuccinate lyase ArgH	8	2	2	0	-2	0.59	0.4643	1
RVBD_1660	-	chalcone synthase Pks10	11	10	12936.4	9073.8	-3862.6	-0.51	0.3748	1
RVBD_1661	-	polyketide synthase Pks7	82	52	19557.3	31468.7	11911.4	0.69	0.1035	1
RVBD_1662	-	polyketide synthase Pks8	67	43	23441.3	18157.9	-5283.4	-0.37	0.2812	1
RVBD_1663	-	polyketide synthase Pks17	19	15	17914.1	10859.2	-7054.9	-0.72	0.2869	1
RVBD_1664	-	polyketide synthase Pks9	47	33	10829	15946.2	5117.2	0.56	0.0549	1
RVBD_1665	-	chalcone synthase Pks11	13	13	12406.1	13249.9	843.8	0.09	0.8769	1
RVBD_1666c	-	cytochrome P450 139 Cyp139	20	17	21572.9	24628.5	3055.6	0.19	0.6738	1
RVBD_1667c	-	ABC macrolide transporter ATP-binding protein	11	9	8377.1	9273.3	896.2	0.15	0.8035	1
RVBD_1668c	-	ABC macrolide transporter ATP-binding protein	14	13	8361.4	5544.3	-2817.1	-0.59	0.2531	1
RVBD_1669	-	hypothetical protein	9	7	1679.9	2141.6	461.7	0.35	0.7053	1
RVBD_1670	-	hypothetical protein	11	9	6822.9	7755.3	932.4	0.18	0.7342	1
RVBD_1671	-	membrane protein	16	9	11388.6	9106.4	-2282.2	-0.32	0.4533	1
RVBD_1672c	-	integral membrane transporter	21	19	17365.8	15046.1	-2319.8	-0.21	0.6677	1
RVBD_1673c	-	hypothetical protein	16	12	11314.7	11664.7	350	0.04	0.9168	1
RVBD_1674c	-	transcriptional regulator	9	7	12684.3	5923.4	-6760.8	-1.1	0.1372	1
RVBD_1675c	-	transcriptional regulator Cmr	11	9	47796	5606.5	-42189.5	-3.09	0.638	1
RVBD_1676	-	hypothetical protein	10	5	3251.1	4961.8	1710.7	0.61	0.2528	1
RVBD_1677	-	lipoprotein DsbF	12	8	3659.5	4966.4	1307	0.44	0.4314	1
RVBD_1678	-	membrane protein	10	7	4196.4	5210.2	1013.8	0.31	0.6462	1
RVBD_1679	-	acyl-CoA dehydrogenase FadE16	11	9	5322.3	6995.2	1672.9	0.39	0.4107	1
RVBD_1680	-	hypothetical protein	16	10	10147.6	6191.4	-3956.3	-0.71	0.2837	1
RVBD_1681	-	molybdopterin biosynthesis protein MoeX	16	15	15184.2	14458.5	-725.7	-0.07	0.871	1
RVBD_1682	-	DivIVA family protein	16	13	11685.8	5684	-6001.8	-1.04	0.0347	0.9035
RVBD_1683	-	bifunctional enzyme long-chain acyl-CoA synthase and lipase	41	27	37534.6	27420.3	-10114.3	-0.45	0.2584	1
RVBD_1684	-	hypothetical protein	5	2	2	0	-2	0.57	0.4561	1
RVBD_1685c	-	hypothetical protein	8	2	8.1	12.9	4.8	0.67	0.8524	1
RVBD_1686c	-	ABC transporter efflux protein DrrB	13	9	3475	5942.9	2467.9	0.77	0.2668	1
RVBD_1687c	-	ABC transporter ATP-binding protein	11	9	3311.4	3445.5	134.1	0.06	0.9506	1
RVBD_1688	-	3-methyladenine DNA glycosylase Mpg	9	9	12712	10132.9	-2579.1	-0.33	0.554	1
RVBD_1689	-	tyrosyl-tRNA synthase TyrS	20	5	4	4.3	0.3	0.12	0.9276	1
RVBD_1690	-	lipoprotein LprJ	9	7	3705.3	3754.9	49.6	0.02	0.9736	1
RVBD_1691	-	hypothetical protein	11	9	1442.8	1401.9	-40.9	-0.04	0.9306	1
RVBD_1692	-	HAD hydrolase, family IIA	12	10	4612.2	2667.8	-1944.4	-0.79	0.2846	1
RVBD_1693	-	hypothetical protein	1	1	2967	1161.4	-1805.6	-1.35	0.194	1
RVBD_1694	-	2'-O-methyltransferase TlyA	11	8	6639.5	4927.9	-1711.6	-0.43	0.5383	1
RVBD_1695	-	inorganic polyphosphate/ATP-NAD kinase PpnK	8	4	5	0	-5	-0.73	0.0895	1
RVBD_1696	-	DNA repair protein RecN	22	19	6030.5	5711.6	-318.9	-0.08	0.8732	1
RVBD_1697	-	hypothetical protein	18	9	188.9	696.5	507.6	1.88	0.1921	1
RVBD_1698	-	outer membrane protein MctB	14	8	4927.6	3092	-1835.6	-0.67	0.3593	1
RVBD_1699	-	CTP synthase PyrG	37	7	38.2	208.5	170.2	2.45	0.3639	1
RVBD_1700	-	ADP-ribose pyrophosphatase	11	8	2404.7	2230.2	-174.5	-0.11	0.8769	1
RVBD_1701	-	tyrosine recombinase xerD	15	9	2839.1	1189.6	-1649.5	-1.25	0.2909	1
RVBD_1702c	-	hypothetical protein	24	20	30387	25915.7	-4471.3	-0.23	0.4974	1
RVBD_1703c	-	catechol-O-methyltransferase	16	14	38414.2	29892.9	-8521.3	-0.36	0.3808	1
RVBD_1704c	-	d-serine/alanine/glycine transporter CycA	23	22	30540.5	27069.2	-3471.3	-0.17	0.6415	1
RVBD_1705c	-	PPE family protein PPE22	27	21	36352.9	32043.8	-4309.1	-0.18	0.555	1
RVBD_1706A	-	hypothetical protein	2	2	5207.4	1572	-3635.4	-1.73	0.3781	1
RVBD_1706c	-	PPE family protein PPE23	20	18	38103.9	42903.5	4799.7	0.17	0.6659	1
RVBD_1707	-	SulP family sulfate permease	21	19	34099.5	29225.7	-4873.8	-0.22	0.543	1
RVBD_1708	-	chromosome partitioning protein	19	7	187.2	7	-180.2	-4.75	0.2956	1
RVBD_1709	-	segregation and condensation protein ScpA	11	10	9198	14126.1	4928.1	0.62	0.1944	1
RVBD_1710	-	segregation and condensation protein ScpB	15	12	6604.8	8880.4	2275.6	0.43	0.2257	1
RVBD_1711	-	pseudouridine synthase	10	5	2	4.2	2.2	1.1	0.4013	1
RVBD_1712	-	cytidylate kinase Cmk	13	5	1728.1	3223.6	1495.5	0.9	0.3484	1
RVBD_1713	-	GTP-binding protein EngA	12	4	4	0	-4	-0.41	0.0765	1
RVBD_1714	-	oxidoreductase	8	6	4540.5	4608.1	67.7	0.02	0.9775	1
RVBD_1715	-	3-hydroxybutyryl-CoA dehydrogenase FadB3	10	4	2449.9	2541.2	91.3	0.05	0.9509	1
RVBD_1716	-	arylformamidase	12	11	7155.4	9277.7	2122.3	0.37	0.2897	1
RVBD_1717	-	hypothetical protein	4	4	2924.9	4156.9	1231.9	0.51	0.2602	1
RVBD_1718	-	hypothetical protein	7	7	5267.3	5676.9	409.6	0.11	0.8752	1
RVBD_1719	-	transcriptional regulator	7	7	2167.2	2742.1	574.9	0.34	0.7605	1
RVBD_1720c	-	toxin VapC12	9	8	3727.9	4196.5	468.6	0.17	0.8174	1
RVBD_1721c	-	antitoxin VapB12	3	2	1534.8	2251.4	716.5	0.55	0.4522	1
RVBD_1722	-	carboxylase	23	21	41372.1	36077.5	-5294.6	-0.2	0.5271	1
RVBD_1723	-	hydrolase	18	16	34125	33634.3	-490.7	-0.02	0.9483	1
RVBD_1724c	-	hypothetical protein	13	12	22650.5	22365.7	-284.8	-0.02	0.9542	1
RVBD_1725c	-	hypothetical protein	13	10	16552.2	18034.5	1482.4	0.12	0.7759	1
RVBD_1726	-	oxidoreductase	16	14	34343.4	23665.1	-10678.3	-0.54	0.4082	1
RVBD_1727	-	hypothetical protein	6	6	13754.2	12943.8	-810.3	-0.09	0.8865	1
RVBD_1728c	-	NLP/P60 family protein	20	16	22586.2	19259.7	-3326.5	-0.23	0.636	1
RVBD_1729c	-	s-adenosylmethionine-dependent methyltransferase	22	17	7977.7	7914.5	-63.1	-0.01	0.9816	1
RVBD_1730c	-	penicillin-binding protein	30	12	6883.3	8844.5	1961.1	0.36	0.5674	1
RVBD_1731	-	succinate-semialdehyde dehydrogenase GabD2	25	19	15266.9	11841.1	-3425.8	-0.37	0.2542	1
RVBD_1732c	-	hypothetical protein	8	7	2302.3	2790.6	488.3	0.28	0.5548	1
RVBD_1733c	-	transmembrane protein	5	5	1583.4	2264.5	681.1	0.52	0.5087	1
RVBD_1734c	-	pyruvate dehydrogenase E2 component (dihydrolipoamide acetyltransferase)	2	2	1995.5	1504.9	-490.6	-0.41	0.781	1
RVBD_1735Ac	-	hypothetical protein	4	4	6876.9	3021.3	-3855.5	-1.19	0.1078	1
RVBD_1735c	-	membrane protein	7	6	7740.4	6818.3	-922.1	-0.18	0.7646	1
RVBD_1736c	-	nitrate reductase NarX	42	36	50025.9	42576.3	-7449.6	-0.23	0.6437	1
RVBD_1737c	-	nitrate/nitrite transporter NarK2	15	15	21175.6	18131.3	-3044.4	-0.22	0.8448	1
RVBD_1738	-	hypothetical protein	3	3	2611.3	3832.3	1221	0.55	0.5182	1
RVBD_1739c	-	sulfate-transport ABC transporter transmembrane protein	41	34	33936.4	29262.3	-4674.1	-0.21	0.4675	1
RVBD_1740	-	antitoxin VapB34	4	2	1760	1500.4	-259.7	-0.23	0.5905	1
RVBD_1741	-	toxin VapC34	7	7	14615.5	13743	-872.5	-0.09	0.8826	1
RVBD_1742	-	hypothetical protein	14	13	12414.9	15992.4	3577.5	0.37	0.2629	1
RVBD_1743	-	transmembrane serine/threonine-protein kinase E PknE	34	28	42723.1	41554.1	-1169.1	-0.04	0.8827	1
RVBD_1744c	-	membrane protein	7	7	19804.8	17946.8	-1858	-0.14	0.7877	1
RVBD_1745c	-	isopentenyl-diphosphate delta-isomerase Idi	13	10	3567.3	2180	-1387.4	-0.71	0.3001	1
RVBD_1746	-	serine/threonine-protein kinase PknF	13	11	21443.1	20080.4	-1362.7	-0.09	0.7585	1
RVBD_1747	-	transmembrane ABC transporter ATP-binding protein	34	31	94510.8	76635.5	-17875.3	-0.3	0.3051	1
RVBD_1748	-	hypothetical protein	13	11	26736.4	23828.2	-2908.2	-0.17	0.748	1
RVBD_1749c	-	integral membrane protein	17	17	23467.5	20965.5	-2502	-0.16	0.5819	1
RVBD_1750c	-	fatty-acid-CoA ligase FadD1	39	33	51115.9	50661.2	-454.7	-0.01	0.9663	1
RVBD_1751	-	oxidoreductase	19	15	13449	11211.7	-2237.3	-0.26	0.5407	1
RVBD_1752	-	hypothetical protein	5	5	3341.2	5877.4	2536.2	0.81	0.3733	1
RVBD_1753c	-	PPE family protein PPE24	66	40	27302.4	21184.6	-6117.8	-0.37	0.4636	1
RVBD_1754c	-	hypothetical protein	40	36	34500.1	39297	4796.9	0.19	0.4896	1
RVBD_1755c	-	phospholipase C4 PlcD	19	5	446.2	1078.3	632.1	1.27	0.0333	0.8869
RVBD_1756c	-	transposase	23	1	0	1.6	1.6	-0.93	1	1
RVBD_1757c	-	transposase	4	4	2541.9	2998.7	456.8	0.24	0.6475	1
RVBD_1758	-	cutinase Cut1	12	11	14448.4	11856	-2592.4	-0.29	0.5819	1
RVBD_1759c	-	PE-PGRS family protein Wag22	26	21	29100	19713.4	-9386.6	-0.56	0.4409	1
RVBD_1760	-	diacylglycerol acyltransferase	28	23	55001.1	52970.3	-2030.8	-0.05	0.8874	1
RVBD_1761c	-	exported protein	6	5	5290.7	6295.6	1004.8	0.25	0.7254	1
RVBD_1762c	-	hypothetical protein	10	9	9531.5	13664.1	4132.6	0.52	0.3979	1
RVBD_1763	-	transposase	6	6	2352.5	3004.6	652	0.35	0.6422	1
RVBD_1764	-	transposase	23	14	9217.2	11415	2197.8	0.31	0.5255	1
RVBD_1765A	-	transposase	3	3	4132.6	4361.4	228.9	0.08	0.8966	1
RVBD_1765c	-	hypothetical protein	7	6	1784.9	2911.1	1126.2	0.71	0.421	1
RVBD_1766	-	hypothetical protein	3	3	2185.5	1458.1	-727.4	-0.58	0.5121	1
RVBD_1767	-	alkylhydroperoxidase AhpD family core domain-containing protein	8	7	12164.2	6854.6	-5309.6	-0.83	0.2849	1	*
RVBD_1768	-	PE-PGRS family protein PE_PGRS31	20	20	24794.8	26875.6	2080.8	0.12	0.7078	1
RVBD_1769	-	hypothetical protein	23	17	26832	19671.5	-7160.5	-0.45	0.1429	1
RVBD_1770	-	hypothetical protein	17	15	40675.8	37907.1	-2768.7	-0.1	0.7985	1
RVBD_1771	-	l-gulono-1,4-lactone dehydrogenase	26	24	25830.7	22879.3	-2951.4	-0.18	0.5994	1
RVBD_1772	-	hypothetical protein	5	4	2279.8	1394.9	-884.9	-0.71	0.3938	1
RVBD_1773c	-	transcriptional regulator	11	8	4019.5	6240.3	2220.8	0.63	0.2641	1
RVBD_1774	-	oxidoreductase	30	26	24786.6	31084.6	6298	0.33	0.4361	1
RVBD_1775	-	hypothetical protein	14	13	12091.2	10115.8	-1975.3	-0.26	0.6132	1
RVBD_1776c	-	transcriptional regulator	12	10	4926.7	6404.9	1478.2	0.38	0.6302	1
RVBD_1777	-	cytochrome P450 144 Cyp144	28	23	30125.4	24405.7	-5719.7	-0.3	0.4831	1
RVBD_1778c	-	hypothetical protein	5	5	2887.1	3073.3	186.3	0.09	0.9038	1
RVBD_1779c	-	integral membrane protein	14	10	37206.6	14254.5	-22952.1	-1.38	0.6919	1
RVBD_1780	-	hypothetical protein	14	14	12627.7	6359.9	-6267.8	-0.99	0.164	1
RVBD_1781c	-	4-alpha-glucanotransferase MalQ	27	26	65696.3	59936.7	-5759.6	-0.13	0.6706	1
RVBD_1782	-	ESX-5 secretion system protein EccB5	20	4	16.9	1.3	-15.6	-3.69	0.0361	0.9087
RVBD_1783	-	ESX-5 secretion system protein EccC5	62	16	671	312	-359.1	-1.11	0.5754	1
RVBD_1785c	-	cytochrome P450 143 Cyp143	22	20	14799.6	16433.2	1633.5	0.15	0.6949	1
RVBD_1786	-	oxidoreductase	1	1	4985.3	5986.3	1001	0.26	0.1015	1
RVBD_1787	-	PPE family protein PPE25	20	18	19794.1	19264.1	-529.9	-0.04	0.9344	1
RVBD_1788	-	PE family protein PE18	6	6	9022.1	9042.2	20.2	0	0.994	1
RVBD_1789	-	PPE family protein PPE26	21	18	38172.6	37296.1	-876.5	-0.03	0.9269	1
RVBD_1790	-	PPE family protein PPE27	21	19	32996.4	27191.6	-5804.8	-0.28	0.4496	1
RVBD_1791	-	PE family protein PE19	6	6	243.1	189	-54.1	-0.36	0.6853	1
RVBD_1792	-	ESAT-6-like protein EsxK	3	3	1318.7	530.7	-787.9	-1.31	0.3163	1
RVBD_1792A	-	ESAT-6-like protein EsxM	2	2	2499.1	1337.1	-1162.1	-0.9	0.2256	1
RVBD_1793	-	ESAT-6 like protein EsxN	6	6	2193	1202.1	-990.9	-0.87	0.2746	1
RVBD_1794	-	hypothetical protein	22	7	2	10.5	8.5	2.4	0.0338	0.8911
RVBD_1795	-	ESX-5 secretion system protein EccD5	23	6	8	1.6	-6.4	-2.34	0.0359	0.9087
RVBD_1796	-	proline rich membrane-anchored mycosin MycP5	36	6	6	4.9	-1.1	-0.31	0.7146	1
RVBD_1797	-	ESX-5 secretion system protein EccE5	15	6	2	7.4	5.4	1.9	0.0899	1
RVBD_1798	-	ESX-5 secretion system protein EccA5	31	27	2672.3	2108.2	-564.1	-0.34	0.7696	1
RVBD_1799	-	lipoprotein LppT	2	1	478.9	1330.6	851.6	1.47	0.2986	1
RVBD_1800	-	PPE family protein PPE28	40	36	72900	63076.8	-9823.1	-0.21	0.4262	1
RVBD_1801	-	PPE family protein PPE29	26	24	44182.7	45904.8	1722.1	0.06	0.8799	1
RVBD_1802	-	PPE family protein PPE30	22	21	41780.7	52627.9	10847.1	0.33	0.1609	1
RVBD_1803c	-	PE-PGRS family protein PE_PGRS32	34	30	42348.7	47327.7	4979	0.16	0.5462	1
RVBD_1804c	-	hypothetical protein	10	9	9589.2	12934.3	3345.1	0.43	0.3886	1
RVBD_1805c	-	hypothetical protein	6	3	225.1	555.4	330.3	1.3	0.2654	1
RVBD_1806	-	PE family protein PE20	6	3	633.4	1142.5	509.1	0.85	0.3243	1
RVBD_1807	-	PPE family protein PPE31	21	17	15365.3	14403	-962.3	-0.09	0.8694	1
RVBD_1808	-	PPE family protein PPE32	29	28	70785.6	62702.6	-8083	-0.17	0.511	1
RVBD_1809	-	PPE family protein PPE33	24	20	35803.4	33637.7	-2165.7	-0.09	0.8075	1
RVBD_1810	-	hypothetical protein	13	12	34055	22097.9	-11957.1	-0.62	0.1501	1
RVBD_1811	-	Mg2+ transport P-type ATPase C MgtC	16	16	56753.9	57814.8	1061	0.03	0.9467	1
RVBD_1812c	-	NADH dehydrogenase-like protein	24	22	45456.9	41486.4	-3970.5	-0.13	0.8005	1
RVBD_1813c	-	hypothetical protein	9	9	5314.3	7066.2	1751.9	0.41	0.2565	1
RVBD_1814	-	C-5 sterol desaturase Erg3	25	22	53275	58594.2	5319.3	0.14	0.6532	1
RVBD_1815	-	hypothetical protein	9	9	15837.6	16609.4	771.8	0.07	0.8294	1
RVBD_1816	-	transcriptional regulator	15	12	13172.4	13795.3	623	0.07	0.8857	1
RVBD_1817	-	flavoprotein	30	28	39647.7	39617.7	-30	0	0.9967	1
RVBD_1818c	-	PE-PGRS family protein PE_PGRS33	15	12	11900.2	9910.9	-1989.3	-0.26	0.4937	1
RVBD_1819c	-	drug-transport transmembrane ABC transporter ATP-binding protein BacA	33	30	51368.2	38581.4	-12786.8	-0.41	0.2176	1
RVBD_1820	-	acetolactate synthase IlvG	20	18	29184.9	25198.2	-3986.7	-0.21	0.5622	1
RVBD_1821	-	preprotein translocase ATPase subunit SecA2	39	33	23443.9	11502.5	-11941.4	-1.03	0.0204	0.708
RVBD_1822	-	CDP-diacylglycerol-glycerol-3-phosphate 3-phosphatidyltransferase PgsA2	17	4	1597.7	1089	-508.7	-0.55	0.4992	1
RVBD_1823	-	hypothetical protein	16	13	12603.6	879.1	-11724.5	-3.84	0.0001	0.0237
RVBD_1824	-	hypothetical protein	5	5	5991	125.9	-5865.1	-5.57	0.015	0.6373
RVBD_1825	-	hypothetical protein	11	10	11849.8	3748.9	-8101	-1.66	0.0059	0.4104
RVBD_1826	-	glycine cleavage system H protein GcvH	9	1	3	0	-3	0	0.399	1
RVBD_1827	-	FHA domain-containing protein GarA	8	2	1	1.2	0.2	0.28	1	1
RVBD_1828	-	hypothetical protein	14	4	4	1.2	-2.8	-1.75	0.3207	1
RVBD_1829	-	hypothetical protein	10	8	5043.8	2856.6	-2187.2	-0.82	0.3582	1
RVBD_1830	-	hypothetical protein	12	4	649.4	383.3	-266.1	-0.76	0.6749	1
RVBD_1831	-	hypothetical protein	5	5	13576.2	15572.2	1996	0.2	0.6905	1
RVBD_1832	-	glycine dehydrogenase GcvB	58	23	2285.3	1528.2	-757.1	-0.58	0.8403	1
RVBD_1833c	-	haloalkane dehalogenase 2	15	14	11696.1	13490.9	1794.8	0.21	0.6051	1
RVBD_1834	-	hydrolase	13	11	16833.6	12521	-4312.6	-0.43	0.2537	1
RVBD_1835c	-	hydrolase	41	36	94973.8	90651.1	-4322.7	-0.07	0.7275	1
RVBD_1836c	-	hypothetical protein	43	38	6805.7	7413.5	607.8	0.12	0.7111	1
RVBD_1837c	-	malate synthase G GlcB	26	7	511.9	273.5	-238.4	-0.9	0.7973	1
RVBD_1838c	-	toxin VapC13	10	10	20353.7	26381.1	6027.3	0.37	0.3543	1
RVBD_1839c	-	antitoxin VapB13	3	3	1203.8	2507.8	1304	1.06	0.1604	1
RVBD_1840c	-	PE-PGRS family protein PE_PGRS34	16	11	6340	5359.9	-980.2	-0.24	0.7013	1
RVBD_1841c	-	hypothetical protein	13	11	12064.5	16224.4	4159.9	0.43	0.3204	1
RVBD_1842c	-	hypothetical protein	16	16	15903.9	18559.8	2656	0.22	0.603	1
RVBD_1843c	-	inosine-5'-monophosphate dehydrogenase GuaB1	24	22	56389.6	48995.7	-7393.9	-0.2	0.7072	1
RVBD_1844c	-	6-phosphogluconate dehydrogenase Gnd1	16	15	41020.1	36395.6	-4624.5	-0.17	0.5584	1
RVBD_1845c	-	ensor-transducer protein BlaR	15	11	322.6	23.2	-299.4	-3.8	0.2461	1
RVBD_1846c	-	transcriptional regulator BlaI	3	3	593.8	1385.9	792.1	1.22	0.1003	1
RVBD_1847	-	hypothetical protein	6	6	14608.1	14325.1	-283	-0.03	0.9628	1
RVBD_1848	-	urease gamma subunit UreA	2	2	3192.7	1769.5	-1423.1	-0.85	0.3719	1
RVBD_1849	-	urease beta subunit UreB	6	4	1611	3161	1550	0.97	0.1451	1
RVBD_1850	-	urease alpha subunit UreC	19	17	16474.5	18978.6	2504.1	0.2	0.55	1
RVBD_1851	-	urease accessory protein UreF	2	2	3483	4248.6	765.6	0.29	0.5421	1
RVBD_1852	-	urease accessory protein UreG	6	5	6054.4	5944.9	-109.4	-0.03	0.9805	1
RVBD_1853	-	urease accessory protein UreD	8	7	4165.9	3878	-287.9	-0.1	0.8748	1
RVBD_1854c	-	NADH dehydrogenase Ndh	19	6	2051.7	880.7	-1171	-1.22	0.5321	1
RVBD_1855c	-	oxidoreductase	16	16	26593	22626.2	-3966.8	-0.23	0.5971	1
RVBD_1856c	-	oxidoreductase	5	1	1	0	-1	1.58	1	1
RVBD_1857	-	molybdenum-transport ABC transporter molybdate-binding lipoprotein ModA	6	6	9462.6	6979.7	-2482.9	-0.44	0.2089	1
RVBD_1858	-	molybdenum-transport ABC transporter integral membrane protein ModB	23	22	25043.2	24490.8	-552.4	-0.03	0.9293	1
RVBD_1859	-	molybdenum-transport ABC transporter ATP-binding protein ModC	16	13	20485.6	15414.7	-5070.9	-0.41	0.2785	1
RVBD_1860	-	alanine and proline rich secreted protein Apa	16	14	5363.6	3555.5	-1808.1	-0.59	0.3458	1
RVBD_1861	-	transmembrane protein	8	7	16323.5	13928.4	-2395.1	-0.23	0.8379	1
RVBD_1862	-	alcohol dehydrogenase AdhA	15	14	21336.7	23126.3	1789.6	0.12	0.7942	1
RVBD_1863c	-	integral membrane protein	10	9	30657	22367.6	-8289.4	-0.45	0.3775	1
RVBD_1864c	-	hypothetical protein	10	10	18478.4	19900.1	1421.8	0.11	0.7866	1
RVBD_1865c	-	oxidoreductase	13	12	38693.7	13269.1	-25424.6	-1.54	0.6963	1
RVBD_1866	-	mycolyltransferase antigen 85B	35	22	27154.6	29764.2	2609.6	0.13	0.6359	1
RVBD_1867	-	acetyl-CoA acetyltransferase	21	18	27740.8	25236.4	-2504.4	-0.14	0.714	1
RVBD_1868	-	hypothetical protein	33	26	51655.4	47611	-4044.5	-0.12	0.7095	1
RVBD_1869c	-	oxidoreductase	26	23	33824.9	38875.4	5050.5	0.2	0.5045	1
RVBD_1870c	-	hypothetical protein	12	12	14601	13615.9	-985	-0.1	0.7709	1
RVBD_1871c	-	deazaflavin-dependent nitroreductase	10	9	20693.5	11398.7	-9294.9	-0.86	0.2197	1
RVBD_1872c	-	l-lactate dehydrogenase LldD2	15	12	25366	20495.4	-4870.6	-0.31	0.63	1
RVBD_1873	-	hypothetical protein	11	11	40172.2	40229.8	57.6	0	0.9951	1
RVBD_1874	-	hypothetical protein	12	11	22160.2	22275	114.8	0.01	0.9889	1
RVBD_1875	-	hypothetical protein	5	5	7585.8	9566.4	1980.5	0.33	0.5839	1
RVBD_1876	-	bacterioferritin BfrA	10	9	16427.4	16607.5	180.1	0.02	0.9704	1
RVBD_1877	-	drug:H+ antiporter-2 (14 Spanner) (DHA2) family drug resistance MFS transporter	34	33	52195.1	57086.3	4891.2	0.13	0.4268	1
RVBD_1878	-	glutamine synthetase GlnA3	28	25	23596.8	28343.9	4747	0.26	0.4616	1
RVBD_1879	-	hypothetical protein	20	17	13502.9	17237.5	3734.6	0.35	0.2584	1
RVBD_1880c	-	cytochrome P450 140 Cyp140	15	13	16018.2	11617	-4401.2	-0.46	0.6909	1
RVBD_1881c	-	lipoprotein LppE	8	6	15425.4	14124.2	-1301.2	-0.13	0.8284	1
RVBD_1882c	-	short-chain dehydrogenase/reductase	15	14	34354.2	37437.7	3083.5	0.12	0.7791	1
RVBD_1883c	-	hypothetical protein	7	7	9733.7	10731.8	998.2	0.14	0.7376	1
RVBD_1884c	-	resuscitation-promoting factor RpfC	6	5	8220.6	4202.9	-4017.7	-0.97	0.2882	1
RVBD_1885c	-	chorismate mutase	14	13	21521.7	24036.5	2514.8	0.16	0.7293	1
RVBD_1886c	-	secreted antigen 85-B FbpB	25	24	52087.8	59498.1	7410.2	0.19	0.4716	1
RVBD_1887	-	hypothetical protein	26	21	52183.6	48802.5	-3381.1	-0.1	0.7859	1
RVBD_1888A	-	hypothetical protein	0	0	0	0	0	0	1	1
RVBD_1888c	-	transmembrane protein	18	16	33192.3	28639.6	-4552.7	-0.21	0.6036	1
RVBD_1889c	-	hypothetical protein	3	2	118.8	906.3	787.5	2.93	0.1248	1
RVBD_1890c	-	hypothetical protein	8	8	5952.5	6771	818.5	0.19	0.6947	1
RVBD_1891	-	hypothetical protein	9	8	9114.2	10792.8	1678.7	0.24	0.6436	1
RVBD_1892	-	membrane protein	8	8	34547.6	33676.2	-871.4	-0.04	0.9308	1
RVBD_1893	-	hypothetical protein	1	1	298.4	692.7	394.3	1.21	0.2984	1
RVBD_1894c	-	hypothetical protein	14	11	47918	47027	-891	-0.03	0.9473	1
RVBD_1895	-	dehydrogenase	19	17	20540.6	19305.3	-1235.3	-0.09	0.7952	1
RVBD_1896c	-	hypothetical protein	24	19	17804.2	23058.6	5254.3	0.37	0.3227	1
RVBD_1897c	-	d-tyrosyl-tRNA(Tyr) deacylase	5	4	4917.9	5542.2	624.3	0.17	0.68	1
RVBD_1898	-	hypothetical protein	4	3	5543.7	5375.9	-167.8	-0.04	0.9556	1
RVBD_1899c	-	lipoprotein LppD	14	14	31652.7	29293.9	-2358.9	-0.11	0.6838	1
RVBD_1900c	-	lignin peroxidase LipJ	25	24	39713.8	48263.7	8549.9	0.28	0.5797	1	*
RVBD_1901	-	cinA-like protein CinA	19	17	65379.2	71303.5	5924.3	0.13	0.6068	1
RVBD_1902c	-	sialic acid-transport integral membrane protein NanT	33	31	48119.2	46435.4	-1683.8	-0.05	0.8795	1
RVBD_1903	-	membrane protein	6	5	10339.4	11534.9	1195.5	0.16	0.7548	1
RVBD_1904	-	anti-anti-sigma factor	10	9	40776.1	28552.8	-12223.3	-0.51	0.3934	1
RVBD_1905c	-	d-amino acid oxidase Aao	18	16	34381.5	27533.8	-6847.6	-0.32	0.3731	1
RVBD_1906c	-	hypothetical protein	9	7	16439.9	12762.5	-3677.4	-0.37	0.6089	1
RVBD_1907c	-	hypothetical protein	10	7	9961.3	9204	-757.3	-0.11	0.7698	1
RVBD_1908c	-	catalase-peroxidase-peroxynitritase T KatG	39	28	1786.1	14.4	-1771.7	-6.95	0	0	*
RVBD_1909c	-	ferric uptake regulation protein FurA	12	9	6750	5368.9	-1381.2	-0.33	0.8639	1
RVBD_1910c	-	exported protein	13	13	32884.9	23181.7	-9703.2	-0.5	0.1639	1
RVBD_1911c	-	lipoprotein LppC	9	9	18147.3	11794.3	-6353	-0.62	0.2265	1
RVBD_1912c	-	oxidoreductase	14	12	9577.4	10988.9	1411.5	0.2	0.6571	1
RVBD_1913	-	hypothetical protein	11	9	9570.7	9237.6	-333.2	-0.05	0.9065	1
RVBD_1914c	-	hypothetical protein	8	7	10754	12961.2	2207.1	0.27	0.607	1
RVBD_1915	-	isocitrate lyase AceAa	21	17	32406.6	28876.3	-3530.2	-0.17	0.6602	1
RVBD_1916	-	isocitrate lyase AceAb	17	14	24093.3	15525.5	-8567.8	-0.63	0.0672	1
RVBD_1917c	-	PPE family protein PPE34	121	87	75485.3	67220.9	-8264.4	-0.17	0.4795	1
RVBD_1918c	-	PPE family protein PPE35	75	47	50700.3	55721.5	5021.2	0.14	0.8156	1
RVBD_1919c	-	hypothetical protein	7	5	10493.9	9153.6	-1340.3	-0.2	0.7589	1
RVBD_1920	-	membrane protein	13	11	14085.3	13822.5	-262.7	-0.03	0.9503	1
RVBD_1921c	-	lipoprotein LppF	23	20	52082.8	43787.2	-8295.6	-0.25	0.3875	1
RVBD_1922	-	beta-lactamase	21	20	30627.6	31631.3	1003.7	0.05	0.886	1
RVBD_1923	-	lipase LipD	35	32	71244	66638.9	-4605	-0.1	0.6572	1
RVBD_1924c	-	hypothetical protein	11	10	22615.1	21598.2	-1016.9	-0.07	0.862	1
RVBD_1925	-	acyl-CoA ligase FadD31	40	37	189688	150176	-39511.6	-0.34	0.1493	1
RVBD_1926c	-	immunogenic protein MPT63	8	8	5993.9	12400.4	6406.5	1.05	0.057	1
RVBD_1927	-	hypothetical protein	17	17	32720.1	32344.3	-375.7	-0.02	0.9713	1
RVBD_1928c	-	oxidoreductase	18	17	38831.7	32875.4	-5956.3	-0.24	0.5387	1
RVBD_1929c	-	hypothetical protein	9	7	4975.4	5912.5	937.1	0.25	0.7046	1
RVBD_1930c	-	hypothetical protein	5	5	2959.3	3553	593.7	0.26	0.7784	1
RVBD_1931c	-	transcriptional regulator	5	4	1442.5	873.9	-568.6	-0.72	0.2717	1
RVBD_1932	-	thiol peroxidase Tpx	9	7	6576.7	5903.5	-673.2	-0.16	0.7548	1	*
RVBD_1933c	-	acyl-CoA dehydrogenase FadE18	10	10	13109.8	5550.7	-7559.1	-1.24	0.0808	1
RVBD_1934c	-	acyl-CoA dehydrogenase FadE17	12	10	16275.7	15371.4	-904.4	-0.08	0.87	1
RVBD_1935c	-	enoyl-CoA hydratase EchA13	10	10	15635.7	16428.7	793	0.07	0.875	1
RVBD_1936	-	monooxygenase	18	18	26434.8	26722.8	288.1	0.02	0.9725	1
RVBD_1937	-	oxidoreductase	49	42	36159.4	37551.4	1392.1	0.05	0.8108	1
RVBD_1938	-	epoxide hydrolase EphB	17	13	10604.4	10420.7	-183.7	-0.03	0.9486	1
RVBD_1939	-	oxidoreductase	5	5	2089.9	2635.1	545.2	0.33	0.7287	1
RVBD_1940	-	riboflavin biosynthesis protein RibA1	9	9	11315	12929.3	1614.3	0.19	0.5964	1
RVBD_1941	-	oxidoreductase	4	3	2664.2	6158.4	3494.2	1.21	0.2399	1
RVBD_1942c	-	toxin MazF5	2	2	990.4	649.6	-340.8	-0.61	0.6757	1
RVBD_1943c	-	antitoxin MazE5	10	4	5886.1	4243.4	-1642.7	-0.47	0.7059	1
RVBD_1944c	-	hypothetical protein	8	7	14402	10657	-3745	-0.43	0.4379	1
RVBD_1945	-	hypothetical protein	21	17	11188.1	11189.3	1.2	0	0.9996	1
RVBD_1946c	-	lipoprotein LppG	7	6	3747.8	5248.5	1500.7	0.49	0.5974	1
RVBD_1947	-	hypothetical protein	6	5	11380.2	5148.2	-6232	-1.14	0.1403	1
RVBD_1948c	-	hypothetical protein	16	14	4466.9	3388	-1078.9	-0.4	0.5588	1
RVBD_1949c	-	hypothetical protein	21	15	27037.7	28290.1	1252.4	0.07	0.8371	1
RVBD_1950c	-	hypothetical protein	6	6	8803.4	11303.9	2500.5	0.36	0.4613	1
RVBD_1951c	-	hypothetical protein	5	3	4836.8	1965.4	-2871.4	-1.3	0.1579	1
RVBD_1952	-	antitoxin VapB14	3	3	3513.5	4535	1021.5	0.37	0.6684	1
RVBD_1953	-	toxin VapC14	12	5	5383.3	6046.4	663.1	0.17	0.7454	1
RVBD_1954A	-	hypothetical protein	5	5	10308.5	9922.7	-385.7	-0.06	0.8944	1
RVBD_1954c	-	hypothetical protein	11	8	22264.4	21652.7	-611.7	-0.04	0.9226	1
RVBD_1955	-	toxin	6	4	9138	9319.5	181.5	0.03	0.9642	1
RVBD_1956	-	antitoxin HigA	8	7	11819.1	8408.7	-3410.4	-0.49	0.3683	1
RVBD_1957	-	hypothetical protein	13	11	6112.6	1141.8	-4970.8	-2.42	0.0017	0.2213
[truncated: 2,037 more rows]
