# Supplementary figures and images for: A nanocompartment system contributes to defense against oxidative stress in Mycobacterium tuberculosis
Source: eLife journal article supplement (doi:10.7554/elife.74358), 2021-11-09

### Tn::DypB+DypB

### Tn::DypB+Cfp29

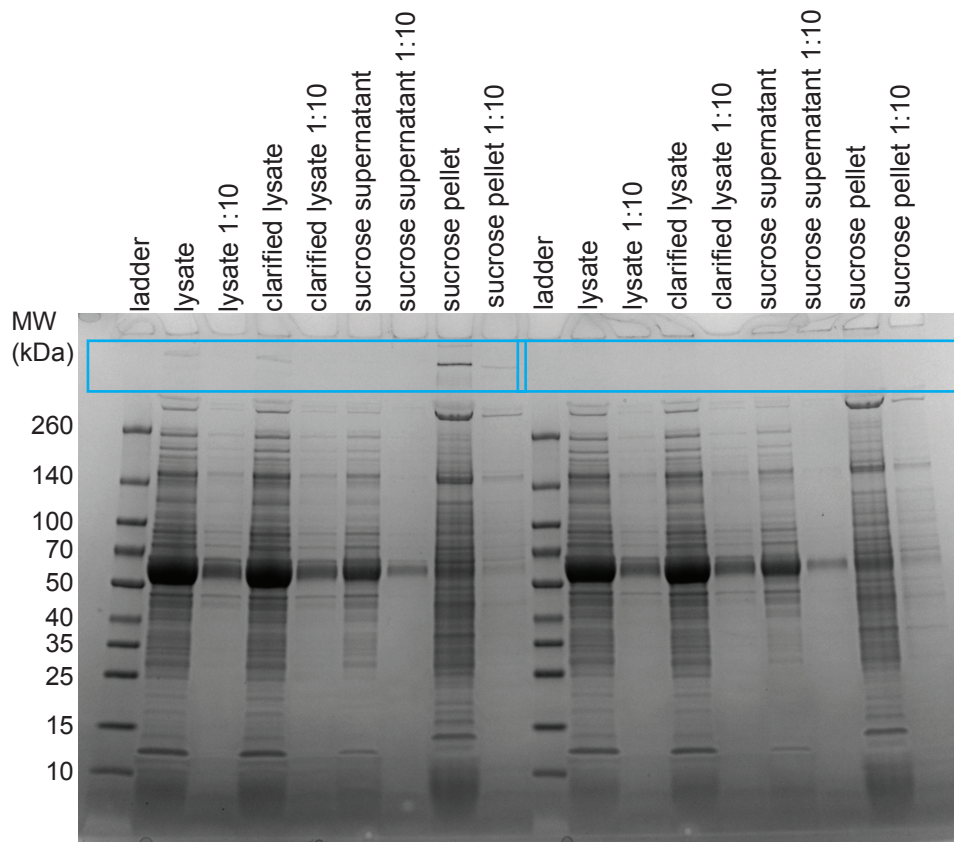

### Tn::DypB+operon

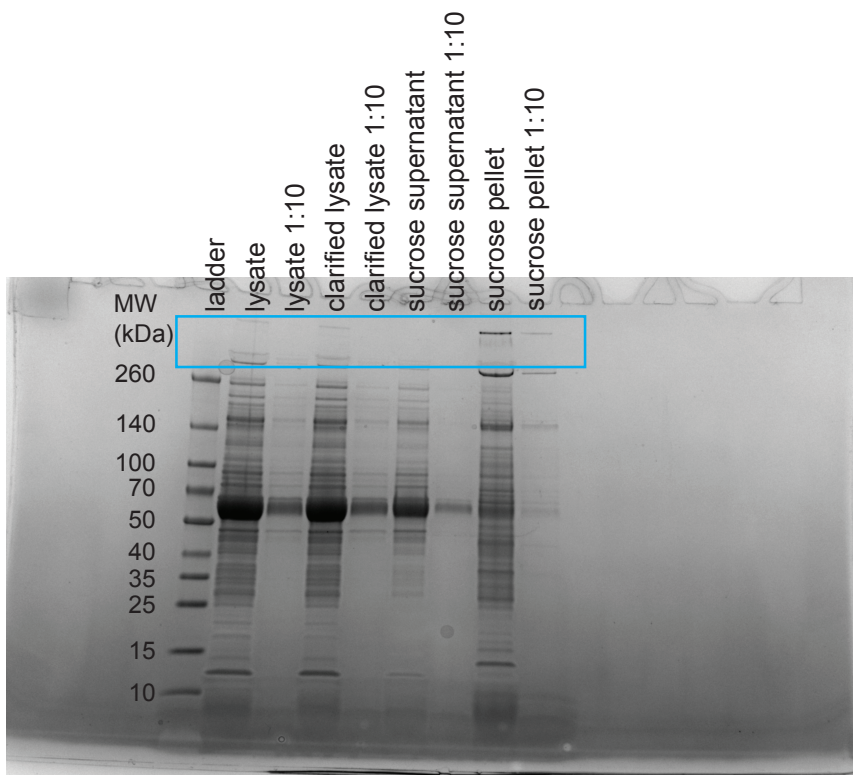

Supplement: supp [file Source Data File 12.pdf › Source Data File 12.pdf]

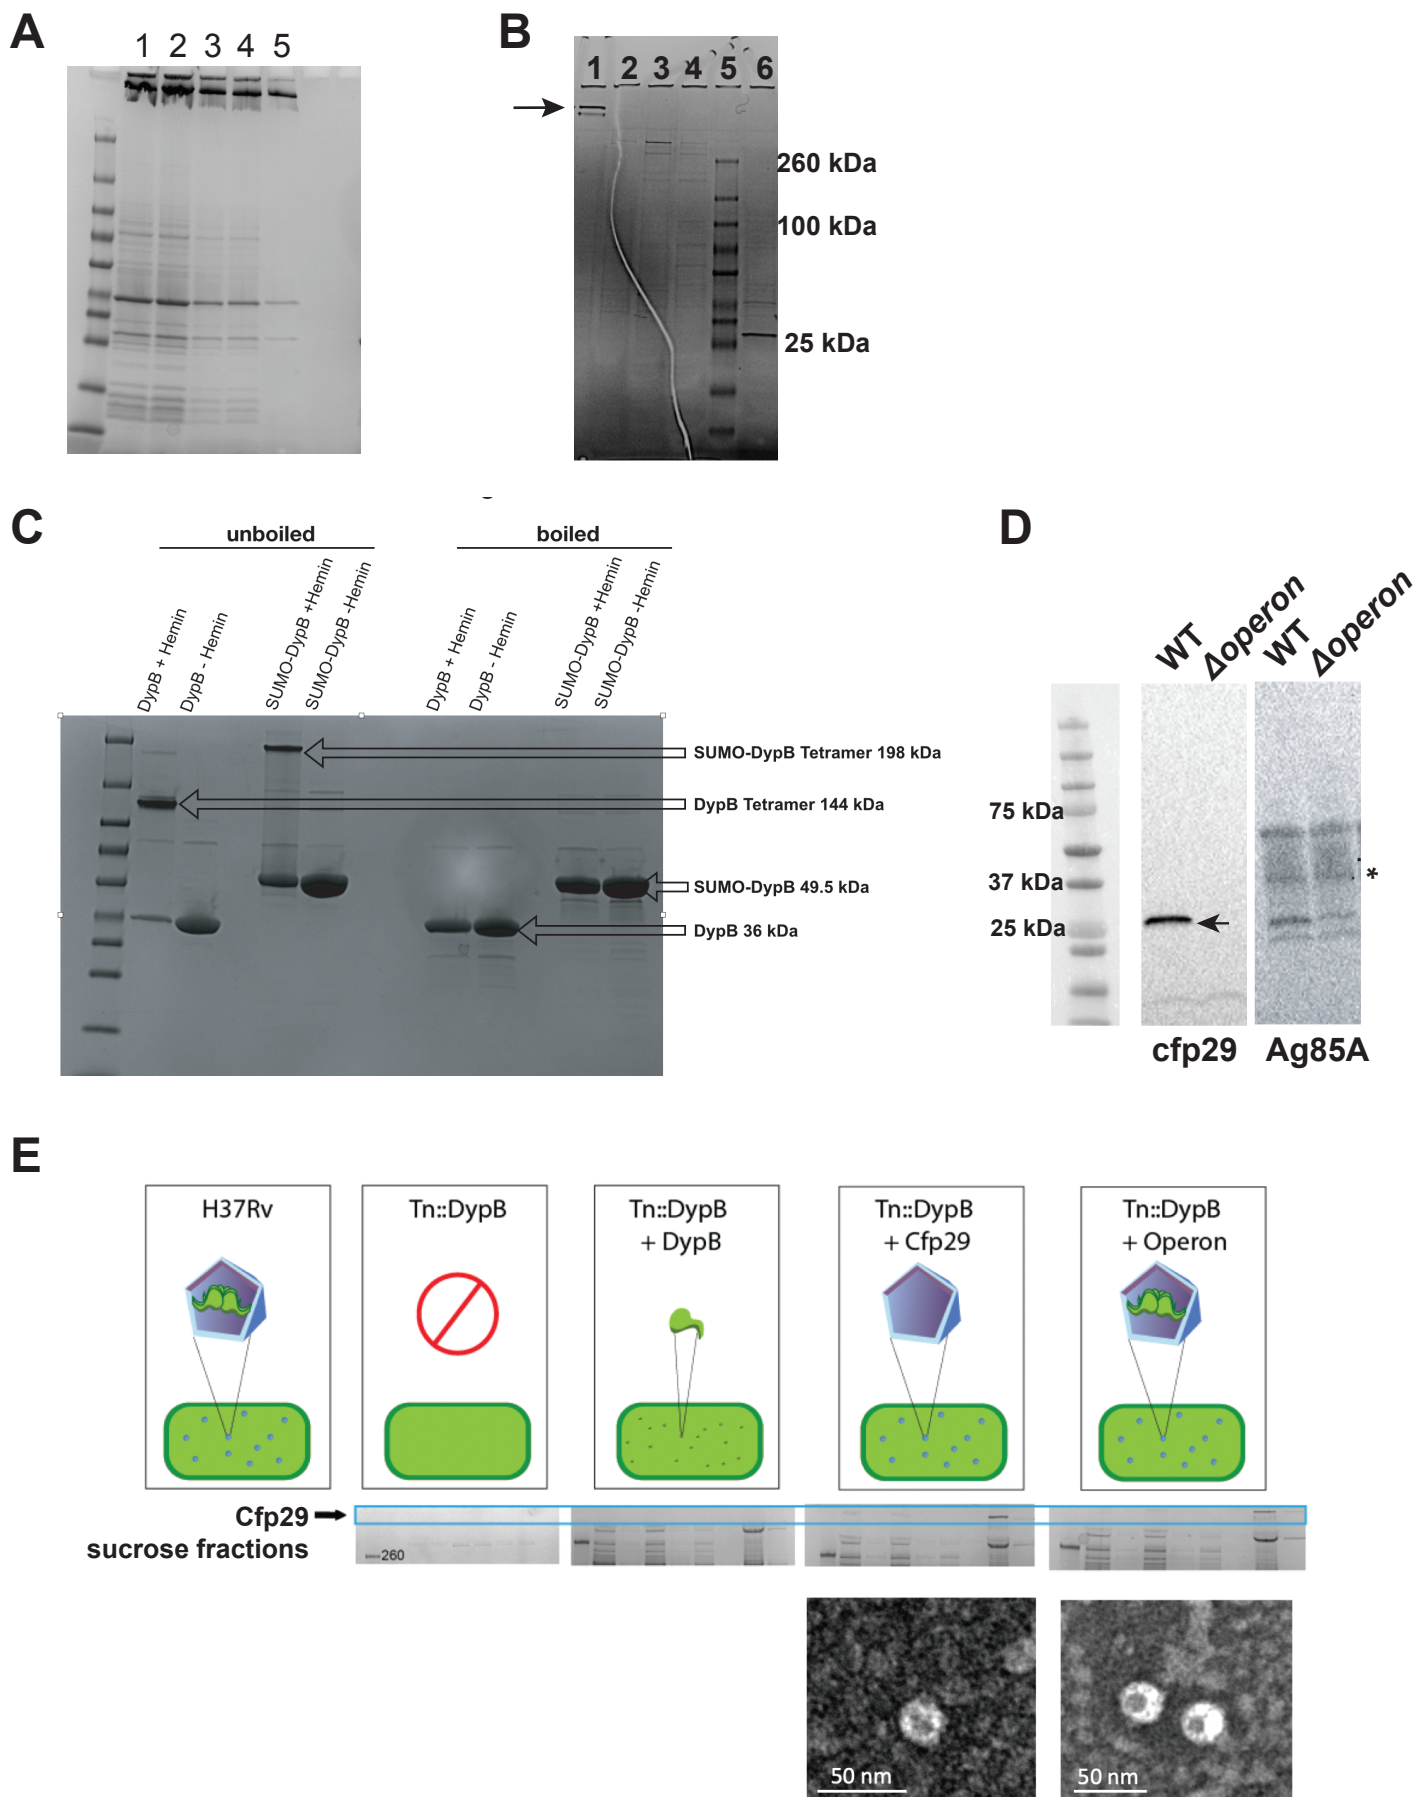

Supplement: supp [file elife_poa_e74358_Figure_1_figure_supplement_1.pdf › elife_poa_e74358_Figure_1_figure_supplement_1.pdf]

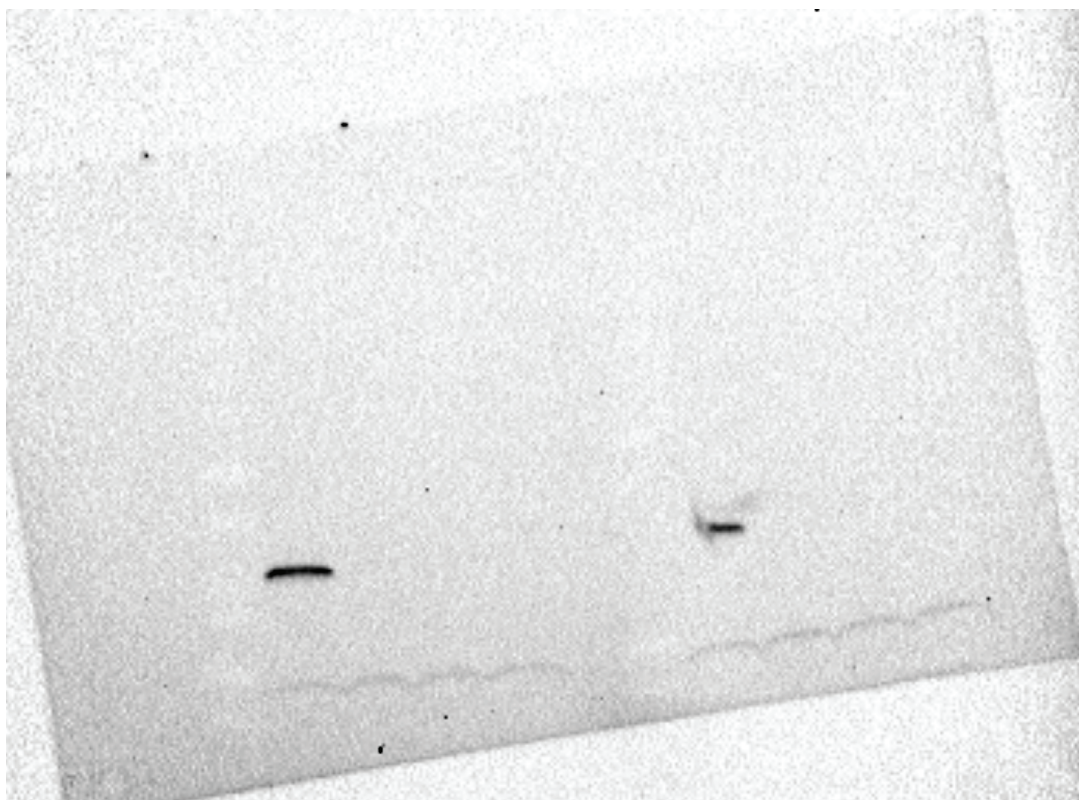

Rv Op 98 99

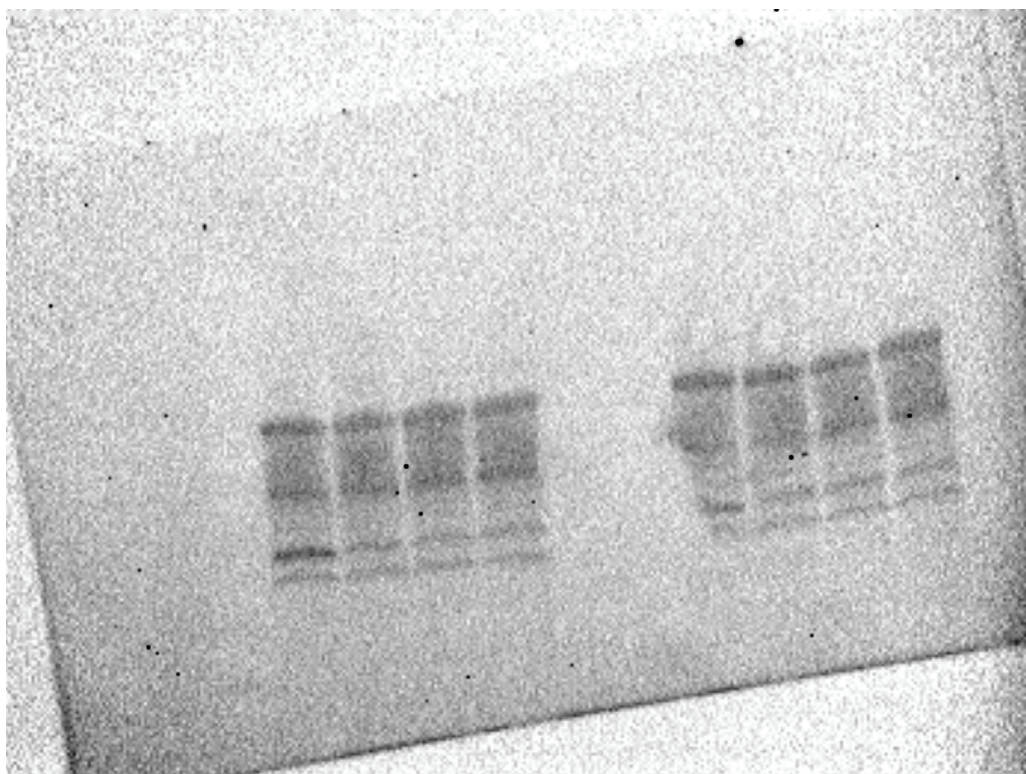

Rv Op 98 99

Supplement: supp10 [file elife-74358-supp10-v2.zip]

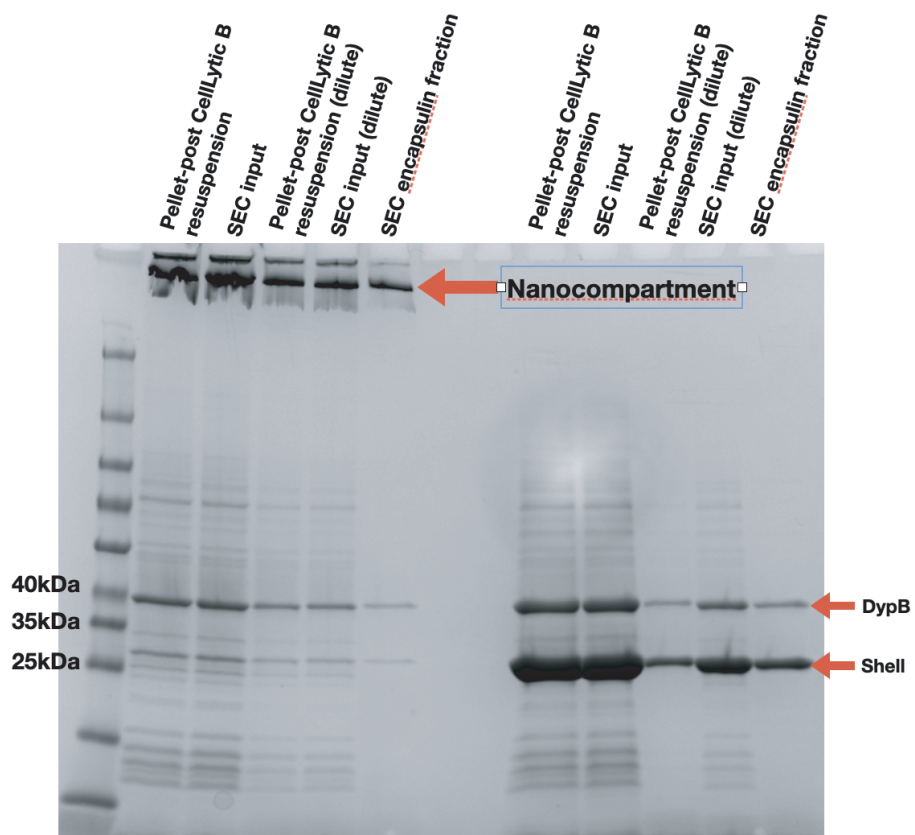

Supplement: supp3 [file elife-74358-supp3-v2.zip]

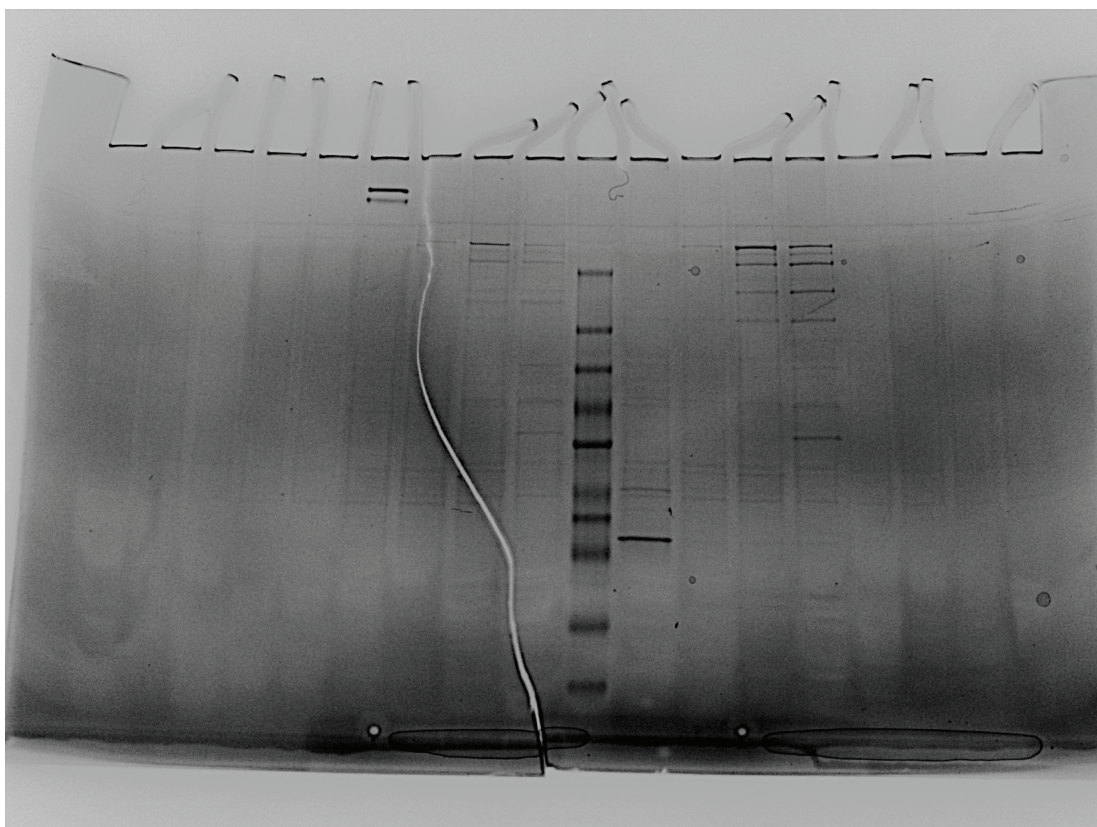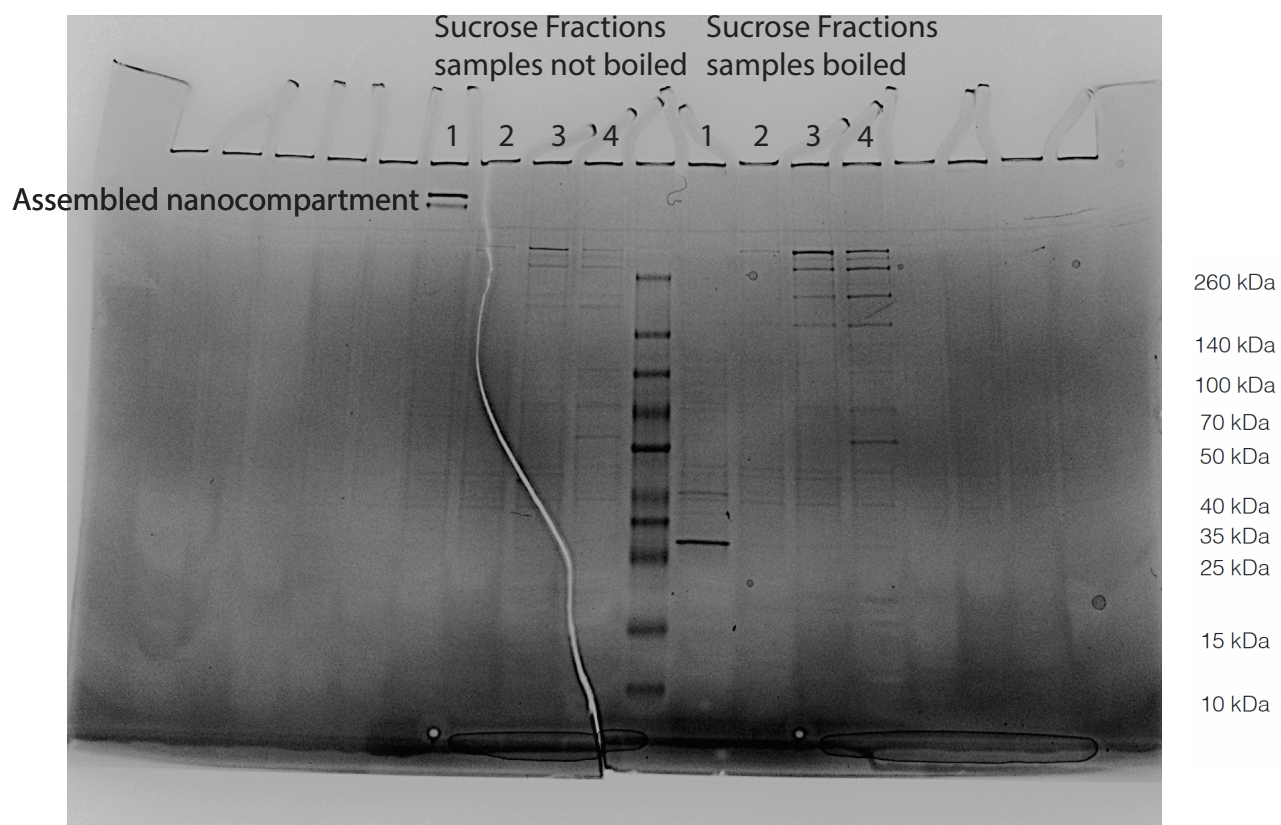

Supplement: supp5 [file elife-74358-supp5-v2.zip]
